# Supplementary material
Source: PubMed Central journal article supplement (PMC2822544)

# Highly Reactive, General and Long-Lived Catalysts for Palladium-Catalyzed Amination of Heteroaryl and Aryl Chlorides, Bromides and Iodides: Scope and Structure-Activity Relationships

Qilong Shen, Tokutaro Ogata and John F. Hartwig\*

Department of Chemistry, Yale University, P.O. Box 208107, New Haven, Connecticut 06520-8107, and Department of Chemistry, University of Illinois, Box 58-6, 600 South Mathews Avenue, Urbana, Illinois 61801

## Supporting Information

**General Methods.** Unless otherwise noted, all manipulation were conducted inside an inert atmosphere glovebox, but procedures for conducting reactions without a glovebox are provided below.  $^1\text{H}$  and  $^{13}\text{C}$  NMR spectra were recorded on a Bruker DPX 400 or 500 MHz Spectrometer and  $^{31}\text{P}$   $\{^1\text{H}\}$  NMR spectra were recorded on a General Electric QE 300 MHz spectrometer with tetramethylsilane or residual protiated solvent as a reference. All  $^{31}\text{P}$   $\{^1\text{H}\}$  NMR chemical shifts are reported in parts per million relative to an 85%  $\text{H}_3\text{PO}_4$  external standard. Shifts downfield of the standard are reported as positive. Elemental analyses were performed by Atlantic Microlabs Inc., Norcross, GA or Robertson Microlab, Inc., Madison, NJ. GC and GC/MS analyses were conducted with an HP-1 methyl silicone column. CyPF-*t*-Bu (CyPF-*t*-Bu = 1-dicyclohexylphosphino-2-di-*t*-butylphosphinoethylferrocene) was obtained from Solvias AG and Strem Chemicals and used without further purification. Ethylene glycol dimethyl ether (DME, 99.9% purity, HPLC grade) was purchased and used without further purification. All other chemicals were used as received from commercial sources.

**Table S1.** Optimization of Palladium-catalyzed Coupling Reaction of 3-Chloropyridine with 1-Octylamine Catalyzed by Palladium Precursors and CyPF-*t*-Bu (1:1).<sup>a</sup>

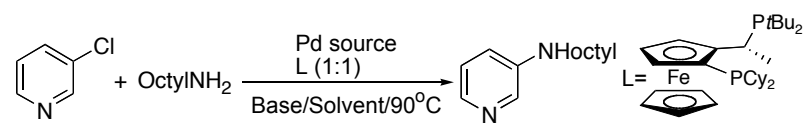

| Entry | Palladium                             | Base                            | Solvent     | Loading (mol %) | Time (h) | Conversion [%] (Yield) <sup>b</sup> |
|-------|---------------------------------------|---------------------------------|-------------|-----------------|----------|-------------------------------------|
| 1     | Pd(dba) <sub>2</sub>                  | NaOtBu                          | DME         | 1               | 10       | 100                                 |
| 2     | PdCl <sub>2</sub> (PhCN) <sub>2</sub> | NaOtBu                          | DME         | 1               | 10       | 96                                  |
| 3     | Pd <sub>2</sub> (dba) <sub>3</sub>    | NaOtBu                          | DME         | 1               | 10       | 100                                 |
| 4     | Pd(OAc) <sub>2</sub>                  | NaOtBu                          | DME         | 1               | 1        | 100 (99)                            |
| 5     | Pd(OAc) <sub>2</sub>                  | NaOtBu                          | DME         | 0.05            | 1        | 100                                 |
| 6     | Pd(OAc) <sub>2</sub>                  | K <sub>3</sub> PO <sub>4</sub>  | DME         | 0.05            | 24       | trace                               |
| 7     | Pd(OAc) <sub>2</sub>                  | Cs <sub>2</sub> CO <sub>3</sub> | DME         | 0.05            | 24       | NR                                  |
| 8     | Pd(OAc) <sub>2</sub>                  | K <sub>2</sub> CO <sub>3</sub>  | DME         | 0.05            | 24       | NR                                  |
| 9     | Pd(OAc) <sub>2</sub>                  | NaOtBu                          | Toluene     | 0.05            | 5        | 100                                 |
| 10    | Pd(OAc) <sub>2</sub>                  | NaOtBu                          | THF         | 0.05            | 1        | 100                                 |
| 11    | Pd(OAc) <sub>2</sub>                  | NaOtBu                          | 1,4-dioxane | 0.05            | 5        | 100                                 |
| 12    | Pd(OAc) <sub>2</sub>                  | NaOtBu                          | DME         | 0.01            | 5        | 100 (99)                            |
| 13    | Pd(OAc) <sub>2</sub>                  | NaOtBu                          | Toluene     | 0.01            | 48       | 81                                  |
| 14    | Pd(OAc) <sub>2</sub>                  | NaOtBu                          | THF         | 0.01            | 48       | 97                                  |
| 15    | Pd(OAc) <sub>2</sub>                  | NaOtBu                          | 1,4-dioxane | 0.01            | 48       | 87                                  |
| 16    | Pd(OAc) <sub>2</sub>                  | NaOtBu                          | DME         | 0.005           | 24       | 100 (93)                            |

<sup>a</sup> All the experiments were conducted with a 1:1 ratio of metal to ligand, 1 mmol of 3-chloropyridine and 1.2 equiv 1-octylamine, and 1.4 equiv base in 1.0 mL solvent. <sup>b</sup> Determined by GC analysis. Isolated yields are indicated in parentheses.

**Stability of Josiphos CyPF-*t*-Bu.** The Josiphos ligand CyPF-*t*-Bu (11.0 mg,  $2.00 \times 10^{-5}$  mmol) was dissolved in C<sub>6</sub>D<sub>6</sub> (0.5 mL) in an uncapped NMR tube in air. The <sup>1</sup>H NMR and <sup>31</sup>P NMR spectra of CyPF-*t*-Bu were unchanged after 24 h. Alternatively, CyPF-*t*-Bu (11.0 mg,  $2.00 \times 10^{-5}$  mmol) was weighed into an open vial in air. The solid was dissolved in C<sub>6</sub>D<sub>6</sub> (0.5 mL) after 24 h. The <sup>1</sup>H NMR and <sup>31</sup>P NMR spectra of Josiphos CyPF-*t*-Bu also were unchanged.

**General Procedure A for Catalytic Amination of Heteroaryl and Aryl Halides in DME.** The reaction conditions and average yields for each reaction are shown in Table 1 and 2. A typical procedure is given for the eleventh entry in Table 1.

**Stock Solution A ( $1.0 \times 10^{-2}$  M):** DME (1.0 mL) was added to the mixture of Pd(OAc)<sub>2</sub> (2.2 mg,  $1.0 \times 10^{-2}$  mmol) and CyPF-*t*-Bu (5.5 mg,  $1.0 \times 10^{-2}$  mmol). The resulting orange colored solution was stirred at room temperature for one minute before using.

**Stock Solution B ( $1.0 \times 10^{-4}$  M):** 10.0 μL of the stock solution A was diluted to 1.0 mL with DME. The resulting pale yellow colored solution was stirred at room temperature for one minute before using.

***N*-Octyl-3-aminopyridine. (Table 1, entry 11).** A solution of Pd(OAc)<sub>2</sub> and CyPF-*t*-Bu (5.0 μL from stock solution A,  $5.0 \times 10^{-5}$  mmol) was added to a 4 mL vial containing 3-chloropyridine (0.114 g, 1.00 mmol) and sodium *tert*-butoxide (0.135 g, 1.40 mmol) in 1.0 mL of DME. Octylamine (0.155 g, 1.20 mmol) was then added by syringe. The vial was sealed with a cap containing a PTFE septum, and the reaction mixture was stirred at 90 °C until 3-chloropyridine was consumed, as determined by GC. The reaction solution was directly adsorbed onto silica gel, and the product was isolated by eluting with hexane/ethyl acetate (85/15) to give 197.2 mg (93%) of *N*-octyl-3-aminopyridine as a yellow solid. <sup>1</sup>H NMR (CDCl<sub>3</sub>) δ 8.02 (d, *J* = 2.8 Hz, 1 H), 7.93 (dd, *J* = 4.4, 1.6 Hz, 1 H), 7.07 (dd, *J* = 8.4, 4.6 Hz, 1 H), 6.86 (ddd, *J* = 8.8, 3.2, 1.6 Hz, 1 H), 3.72 (s, b, 1 H), 3.11 (t, *J* = 7.2 Hz, 2 H), 1.63 (quint, *J* = 7.2 Hz, 2 H), 1.26-1.42 (m, 10 H), 0.89 (t, *J* = 7.2 Hz, 3 H); <sup>13</sup>C NMR (CDCl<sub>3</sub>) δ 144.37, 138.0, 135.69, 123.49, 118.01, 43.35, 31.63, 29.19, 29.16, 29.06, 26.92, 22.47, 13.91; Anal. Calcd. For C<sub>13</sub>H<sub>22</sub>N<sub>2</sub>: C, 75.68; H, 10.75; N, 13.58. Found: C, 75.74; H, 10.94; N, 13.79.

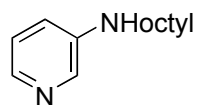

***N*-Octyl-2-aminopyridine. (Table 1, entry 1).** The general procedure A conducted with 2-chloropyridine (0.114 g, 1.00 mmol), octylamine (0.155 g, 1.20 mmol), Pd(OAc)<sub>2</sub> and CyPF-*t*-Bu (100.0 μL from stock solution B,  $1.0 \times 10^{-5}$  mmol) gave 176.3 mg (86%) of *N*-benzyl-2-aminopyridine as a colorless liquid. <sup>1</sup>H NMR (CDCl<sub>3</sub>) δ 8.07 (d, *J* = 4.8 Hz, 1 H), 7.42 (dd, *J* = 8.6, 7.2 Hz, 1 H), 6.38 (d, *J* = 8.4 Hz, 1 H), 6.55 (dd, *J* = 7.0, 4.8 Hz, 1 H), 4.55 (s, b, 1 H), 3.24 (q, *J* = 6.8 Hz, 2 H), 1.62 (quint, *J* = 7.2 Hz, 2 H), 1.20-1.42 (m, 10 H), 0.89 (t, *J* = 6.8 Hz, 3 H); <sup>13</sup>C NMR (CDCl<sub>3</sub>) δ 158.88, 148.14, 137.19, 12.32, 106.1, 42.32, 31.68, 29.59, 29.42, 29.24, 27.11, 22.51, 13.95; Anal. Calcd. For C<sub>13</sub>H<sub>22</sub>N<sub>2</sub>: C, 75.68; H, 10.75; N, 13.58. Found: C, 75.71; H, 10.67; N, 13.74.

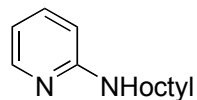

***N*-Octyl-2-aminopyridine. (Table 1, entry 2).** The general procedure A conducted with 2-iodopyridine (0.205 g, 1.00 mmol), octylamine (0.155 g, 1.20 mmol), Pd(OAc)<sub>2</sub> and CyPF-*t*-Bu (5.0 μL from stock solution A,  $5.0 \times 10^{-5}$  mmol) gave 12.2 mg (84%) of *N*-octyl-2-aminopyridine as a yellow solid. (<sup>1</sup>H and <sup>13</sup>C NMR spectra are the same as those for the product in Table 1, entry 1.)

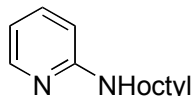

***N*-Octyl-2-aminopyridine.** (Table 1, entry 3). The general procedure A conducted with 2-bromopyridine (0.158 g, 1.00 mmol), octylamine (0.155 g, 1.20 mmol), Pd(OAc)<sub>2</sub> and CyPF-*t*-Bu (50.0 μL from stock solution B, 5.0 × 10<sup>-6</sup> mmol) gave 196.8 mg (96%) of *N*-octyl-2-aminopyridine as a yellow solid. (<sup>1</sup>H and <sup>13</sup>C NMR spectra are the same as those for the product in Table 1, entry 1.)

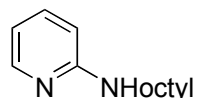

***N*-benzyl-2-aminopyridine.**<sup>1</sup> (Table 1, entry 4). The general procedure A conducted with 2-chloropyridine (0.114 g, 1.00 mmol), benzylamine (0.129 g, 1.20 mmol), Pd(OAc)<sub>2</sub> and CyPF-*t*-Bu (100.0 μL from stock solution B, 1.0 × 10<sup>-5</sup> mmol) gave 173.6 mg (85%) of *N*-benzyl-2-aminopyridine as a colorless liquid. <sup>1</sup>H NMR (CDCl<sub>3</sub>) δ 7.95 (dt, *J* = 4.8, 1.0 Hz, 1 H), 7.26 (td, *J* = 8.0, 1.2 Hz, 1 H), 7.24 (d, *J* = 8.0 Hz, 2 H), 7.21 (t, *J* = 8.0 Hz, 2 H), 7.15 (t, *J* = 7.2 Hz, 1 H), 6.45 (dd, *J* = 7.2, 4.8 Hz, 1 H), 6.23 (dd, *J* = 8.0, 0.8 Hz, 1 H), 5.13 (s, 1 H), 4.38 (d, *J* = 5.6 Hz, 2 H); <sup>13</sup>C NMR (CDCl<sub>3</sub>) δ 158.63, 148.08, 139.14, 137.31, 128.49, 127.28, 127.06, 112.92, 106.60, 46.17.

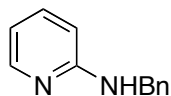

***N*-Benzyl-2-aminopyridine.**<sup>1</sup> (Table 1, entry 5). The general procedure A conducted with 2-bromopyridine (0.158 g, 1.00 mmol), benzylamine (0.129 g, 1.20 mmol), Pd(OAc)<sub>2</sub> and CyPF-*t*-Bu (50.0 μL from stock solution B, 5.0 × 10<sup>-6</sup> mmol) gave 152.7 mg (83%) of *N*-benzyl-2-aminopyridine as a white solid. (<sup>1</sup>H and <sup>13</sup>C NMR spectra are the same as those for the product in Table 1, entry 4.)

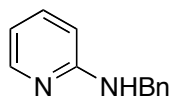

***N*-Cyclohexyl-2-aminopyridine.**<sup>1</sup> (Table 1, entry 6). The general procedure A conducted with 2-chloropyridine (0.114 g, 1.00 mmol), cyclohexylamine (0.119 g, 1.20 mmol), Pd(OAc)<sub>2</sub> and CyPF-*t*-Bu (10.0 μL from stock solution A, 1.0 × 10<sup>-4</sup> mmol) gave 173.1 mg (98%) of *N*-cyclohexyl-2-aminopyridine as a white solid. <sup>1</sup>H NMR (CDCl<sub>3</sub>) δ 7.97 (dt, *J* = 5.0, 0.8 Hz, 1 H), 7.28 (ddd, *J* = 8.4, 6.8, 1.6 Hz, 1 H), 6.42 (dd, *J* = 6.8, 5.0 Hz, 1 H), 6.26 (d, *J* = 8.0 Hz, 1 H), 4.48 (d, *J* = 6.4 Hz, 1 H), 3.41-3.49 (m, 1 H), 1.93-1.97 (m, 2 H), 1.66 (dt, *J* = 13.2, 3.6 Hz, 2 H), 1.55 (dt, *J* = 12.4, 4.0 Hz, 1 H), 1.25-1.36 (m, 2 H), 1.06-1.19 (m, 3 H); <sup>13</sup>C NMR (CDCl<sub>3</sub>) δ 158.03, 148.13, 137.11, 112.14, 106.57, 49.95, 33.23, 25.67, 24.78.

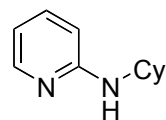

***N*-Cyclohexyl-2-aminopyridine.**<sup>1</sup> (Table 1, entry 7). The general procedure A conducted with 2-bromopyridine (0.158 g, 1.00 mmol), cyclohexylamine (0.119 g, 1.20 mmol), Pd(OAc)<sub>2</sub> and CyPF-*t*-Bu (5.0 μL from stock solution A, 5.0 × 10<sup>-5</sup> mmol) gave 168.4 mg (96%) of *N*-cyclohexyl-2-

aminopyridine as a white solid. ( $^1\text{H}$  and  $^{13}\text{C}$  NMR spectra are the same as those for the product in Table 2, entry 4.)

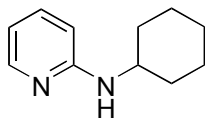

***N*-sec-Butyl-2-aminopyridine. (Table 1, entry 8).** The general procedure conducted with 2-iodopyridine (0.125 g, 1.00 mmol), *sec*-butylamine (87.8 mg, 1.20 mmol), Pd(OAc)<sub>2</sub> and CyPF-*t*-Bu (5.0  $\mu\text{L}$  from stock solution A,  $5.0 \times 10^{-5}$  mmol) and sodium *tert*-butoxide (0.135 g, 1.40 mmol) gave 146.8 mg (98%) of *N*-*sec*-butyl-2-aminopyridine as a colorless liquid.  $^1\text{H}$  NMR (CDCl<sub>3</sub>)  $\delta$  7.98 (dt,  $J = 5.0, 0.8$  Hz, 1 H), 7.30 (ddd,  $J = 8.8, 7.6, 2.0$  Hz, 1 H), 6.43 (ddd,  $J = 7.2, 4.8, 0.8$  Hz, 1 H), 6.26 (d,  $J = 8.4$  Hz, 1 H), 4.37 (d,  $J = 4.8$  Hz, 1 H), 3.57-3.62 (m, 1 H), 1.42-1.52 (m, 2 H), 1.11 (d,  $J = 6.4$  Hz, 3 H), 0.87 (t,  $J = 7.6$  Hz, 3 H);  $^{13}\text{C}$  NMR (CDCl<sub>3</sub>)  $\delta$  158.37, 148.17, 137.23, 112.20, 106.52, 48.38, 29.69, 20.28, 10.27. Anal. Calcd. For C<sub>9</sub>H<sub>14</sub>N<sub>2</sub>: C, 71.96; H, 9.39; N, 18.65. Found: C, 72.01; H, 9.58; N, 18.51.

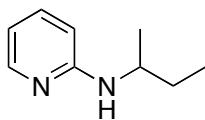

***N*-(2-Pyridyl)- $\alpha$ -methyl-benzylamine. (Table 1, entry 9).** The general procedure A conducted with 2-chloropyridine (0.114 g, 1.00 mmol),  $\alpha$ -methyl-benzylamine (0.145 g, 1.20 mmol, 99 % ee), Pd(OAc)<sub>2</sub> and CyPF-*t*-Bu (50.0  $\mu\text{L}$  from stock solution A,  $5.0 \times 10^{-4}$  mmol) gave 181.3 mg (91%, 94.5% ee) of *N*-(2-pyridyl)- $\alpha$ -methyl-benzylamine. The ee was determined on Chiralcel OD-H column with hexane/2-propanol = 90/10, flow = 1.0 ml/min, wavelength = 254 nm. Retention time 5.71 mins (*S*-isomer), 9.28 mins (*R*-isomer).  $^1\text{H}$  NMR (CDCl<sub>3</sub>)  $\delta$  7.97 (ddd,  $J = 5.0, 2.0, 1.0$  Hz, 1 H), 7.28 (dd,  $J = 7.5, 1.0$  Hz, 2 H), 7.22 (d,  $J = 7.5$  Hz, 1 H), 7.17-7.21 (m, 2 H), 7.12 (t,  $J = 7.0$  Hz, 1 H), 6.42 (ddd,  $J = 7.5, 5.0, 1.0$  Hz, 1 H), 6.08 (d,  $J = 8.0$  Hz, 1 H), 5.19 (d,  $J = 5.5$  Hz, 1 H), 4.62 (quint,  $J = 6.5$  Hz, 1 H), 1.44 (d,  $J = 6.5$  Hz, 3 H);  $^{13}\text{C}$  NMR (CDCl<sub>3</sub>) 158.03, 148.08, 144.63, 137.33, 128.52, 126.87, 127.45, 112.87, 106.51, 51.81, 24.30. Anal. Calcd. For C<sub>13</sub>H<sub>14</sub>N<sub>2</sub>: C, 78.75; H, 7.12; N, 14.13. Found: C, 78.67; H, 7.11; N, 14.13.

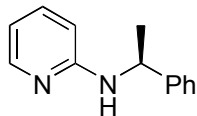

***N*-Octyl-2-amino-3-methylpyridine. (Table 1, entry 10).** The general procedure A conducted with 2-chloro-3-methylpyridine (0.126 g, 1.00 mmol), octylamine (0.155 g, 1.20 mmol), Pd(OAc)<sub>2</sub> and CyPF-*t*-Bu (5.0  $\mu\text{L}$  from stock solution A,  $5.0 \times 10^{-5}$  mmol) gave 211.6 mg (96%) of *N*-octyl-2-amino-3-methylpyridine as a pale yellow liquid.  $^1\text{H}$  NMR (CDCl<sub>3</sub>)  $\delta$  7.98 (d,  $J = 4.2$  Hz, 1 H), 7.14 (d,  $J = 7.2$  Hz, 1 H), 6.44 (dd,  $J = 6.8, 5.2$  Hz, 1 H), 4.03 (s, b, 1 H), 3.41 (q,  $J = 6.5$  Hz, 2 H), 2.02 (s, 3 H), 1.60 (quint,  $J = 7.2$  Hz, 2 H), 1.19-1.40 (m, 10 H), 0.84 (t,  $J = 6.8$  Hz, 3 H);  $^{13}\text{C}$  NMR (CDCl<sub>3</sub>)  $\delta$  156.90, 145.38, 136.44, 116.18, 112.10, 41.68, 31.75, 29.81, 29.35, 29.19, 27.11, 22.57, 16.86, 14.00. Anal. Calcd. For C<sub>14</sub>H<sub>24</sub>N<sub>2</sub>: C, 76.31; H, 10.98; N, 12.71. Found: C, 76.25; H, 10.99; N, 12.41.

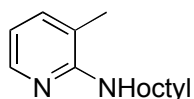

***N*-Octyl-3-aminopyridine. (Table 1, entry 11).** The general procedure A conducted with 3-chloropyridine (0.114 g, 1.00 mmol), octylamine (0.155 g, 1.20 mmol), Pd(OAc)<sub>2</sub> and CyPF-*t*-Bu (5.0 μL from stock solution A, 5.0 × 10<sup>-5</sup> mmol) gave 197.2 mg (93%) of *N*-octyl-3-aminopyridine as a yellow solid. <sup>1</sup>H NMR (CDCl<sub>3</sub>) δ 8.02 (d, *J* = 2.8 Hz, 1 H), 7.93 (dd, *J* = 4.4, 1.6 Hz, 1 H), 7.07 (dd, *J* = 8.4, 4.6 Hz, 1 H), 6.86 (ddd, *J* = 8.8, 3.2, 1.6 Hz, 1 H), 3.72 (s, b, 1 H), 3.11 (t, *J* = 7.2 Hz, 2 H), 1.63 (quint, *J* = 7.2 Hz, 2 H), 1.26-1.42 (m, 10 H), 0.89 (t, *J* = 7.2 Hz, 3 H); <sup>13</sup>C NMR (CDCl<sub>3</sub>) δ 144.37, 138.0, 135.69, 123.49, 118.01, 43.35, 31.63, 29.19, 29.16, 29.06, 26.92, 22.47, 13.91; Anal. Calcd. For C<sub>13</sub>H<sub>22</sub>N<sub>2</sub>: C, 75.68; H, 10.75; N, 13.58. Found: C, 75.74; H, 10.94; N, 13.79.

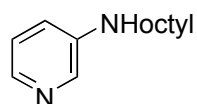

***N*-Octyl-3-aminopyridine. (Table 1, entry 12).** The following procedure was performed without a drybox. An oven-dried resealable Schlenk flask capped with a rubber septum was evacuated and backfilled with N<sub>2</sub>. To the flask was added NaOtBu (0.135 g, 1.40 mmol) and a stir bar. The flask was evacuated and backfilled with N<sub>2</sub> three times. To the flask was then added 3-chloropyridine (0.114 g, 1.00 mmol, 95.0 μL), DME (1.0 mL), a stock solution (5.0 μL) containing Pd(OAc)<sub>2</sub> (5.0 × 10<sup>-5</sup> mmol) and CyPF-*t*-Bu (5.0 × 10<sup>-5</sup> mmol) and octylamine (0.155 g, 1.20 mmol). The rubber septum was wrapped with vinyl electrical tape to prevent leaking. The resulting mixture was stirred for 48 h at 100 °C until the 3-chloropyridine was consumed, as determined by GC. The reaction solution was directly adsorbed onto silica gel, and the product was isolated by eluting with hexane/ethyl acetate (85/15) to give 204.3 mg (99%) of *N*-octyl-3-aminopyridine as a yellow solid. (<sup>1</sup>H and <sup>13</sup>C NMR spectra are the same as those for the product in Table 1, entry 11.)

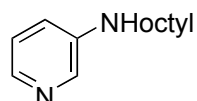

***N*-octyl-3-aminopyridine. (Table 1, entry 13).** The general procedure A conducted with 3-bromopyridine (0.158 g, 1.00 mmol), octylamine (0.155 g, 1.20 mmol), Pd(OAc)<sub>2</sub> and CyPF-*t*-Bu (5.0 μL from stock solution A, 5.0 × 10<sup>-5</sup> mmol) gave 207.7 mg (99%) of *N*-octyl-3-aminopyridine as a white solid. (<sup>1</sup>H and <sup>13</sup>C NMR spectra are the same as those for the product in Table 1, entry 11.)

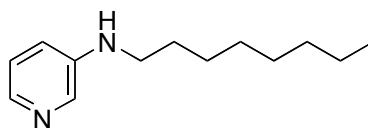

***N*-Benzyl-3-aminopyridine.<sup>2</sup> (Table 1, entry 14).** The general procedure A conducted with 3-chloropyridine (0.114 g, 1.00 mmol), benzylamine (0.129 g, 1.20 mmol), Pd(OAc)<sub>2</sub> and CyPF-*t*-Bu (10.0 μL from stock solution A, 1.0 × 10<sup>-4</sup> mmol) gave 174.8 mg (95%) of *N*-benzyl-3-aminopyridine as a yellow solid. <sup>1</sup>H NMR (CDCl<sub>3</sub>) δ 7.93 (d, *J* = 2.8 Hz, 1 H), 7.83 (dd, *J* = 4.8, 1.6 Hz, 1 H), 7.23 (d, *J* = 4.4 Hz, 4 H), 7.14-7.19 (m, 1 H), 6.91 (dd, *J* = 8.0, 4.4 Hz, 1 H), 6.72 (ddd, *J* = 8.4, 2.8, 1.2 Hz, 1 H), 4.37 (s, b, 1 H), 4.19 (d, *J* = 6.0 Hz, 2 H); <sup>13</sup>C NMR (CDCl<sub>3</sub>) δ 143.97, 138.51, 138.45, 135.97, 128.54, 127.23, 127.19, 123.52, 118.26, 47.54.

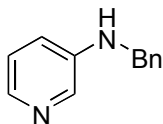

***N*-Benzyl-3-aminopyridine.**<sup>2</sup> (Table 1, entry 15). The general procedure A conducted with 3-bromopyridine (0.158 g, 1.00 mmol), benzylamine (0.129 g, 1.20 mmol), Pd(OAc)<sub>2</sub> and CyPF-*t*-Bu (5.0 μL from stock solution A, 5.0 × 10<sup>-5</sup> mmol) gave 183.3 mg (99%) of *N*-benzyl-3-aminopyridine as a white solid. (<sup>1</sup>H and <sup>13</sup>C NMR spectra are the same as those for the product in Table 1, entry 14.)

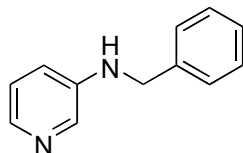

***N*-sec-Butyl-3-aminopyridine.** (Table 1, entry 16). The general procedure A conducted with 3-bromopyridine (0.158 g, 1.00 mmol), *sec*-butylamine (0.119 g, 1.20 mmol), Pd(OAc)<sub>2</sub> and CyPF-*t*-Bu (5.0 μL from stock solution A, 5.0 × 10<sup>-5</sup> mmol) gave 139.3 mg (93%) of *N*-*sec*-butyl-3-aminopyridine as a white solid. <sup>1</sup>H NMR (CDCl<sub>3</sub>) δ 7.91 (d, *J* = 2.8 Hz, 1 H), 7.80 (dd, *J* = 4.4, 1.2 Hz, 1 H), 6.95 (ddd, *J* = 8.0, 4.4, 0.8 Hz, 1 H), 6.73 (ddd, *J* = 8.4, 2.8, 1.4 Hz, 1 H), 3.74 (s, b, 1 H), 3.28-3.31 (m, 1 H), 1.44-1.55 (m, 1 H), 1.33-1.42 (m, 1 H), 1.07 (d, *J* = 6.4 Hz, 3 H), 0.85 (t, *J* = 7.6 Hz, 3 H); <sup>13</sup>C NMR (CDCl<sub>3</sub>) δ 143.61, 137.62, 135.99, 123.48, 118.32, 49.30, 29.18, 19.76, 10.08; Anal. Calcd. For C<sub>9</sub>H<sub>14</sub>N<sub>2</sub>: C, 71.96; H, 9.39; N, 18.65. Found: C, 71.69; H, 9.41; N, 18.65.

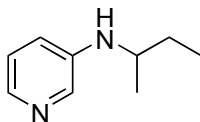

***N*-iso-Butyl-2-aminopyridine.** (Table 1, entry 17). The general procedure conducted with 3-iodopyridine (0.125 g, 1.00 mmol), *iso*-butylamine (87.8 mg, 1.20 mmol), Pd(OAc)<sub>2</sub> and CyPF-*t*-Bu (50.0 μL from stock solution A, 5.0 × 10<sup>-4</sup> mmol) and sodium *tert*-butoxide (0.135 g, 1.40 mmol) gave 144.0 mg (96%) of *N*-*iso*-butyl-2-aminopyridine as a colorless liquid. <sup>1</sup>H NMR (CDCl<sub>3</sub>) δ 7.93 (d, *J* = 2.8 Hz, 1 H), 7.82 (dd, *J* = 4.8, 1.2 Hz, 1 H), 6.95 (dd, *J* = 8.4, 4.4 Hz, 1 H), 6.75 (ddd, *J* = 8.0, 2.8, 1.2 Hz, 1 H), 4.01 (s, 1 H), 2.82 (t, *J* = 4.8 Hz, 2 H), 1.73-1.84 (m, 1 H), 0.89 (d, *J* = 6.7 Hz, 6 H); <sup>13</sup>C NMR (CDCl<sub>3</sub>) δ 144.44, 137.86, 135.67, 123.47, 117.90, 51.06, 27.74, 20.18. Anal. Calcd. For C<sub>9</sub>H<sub>14</sub>N<sub>2</sub>: C, 71.96; H, 9.39; N, 18.65. Found: C, 71.88; H, 9.42; N, 18.54.

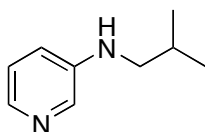

***N*-Cyclohexyl-3-aminopyridine.**<sup>1</sup> (Table 1, entry 18). The general procedure A conducted with 3-chloropyridine (0.114 g, 1.00 mmol), cyclohexylamine (0.119 g, 1.20 mmol), Pd(OAc)<sub>2</sub> and CyPF-*t*-Bu (10.0 μL from stock solution A, 1.0 × 10<sup>-4</sup> mmol) gave 138.4 mg (79%) of *N*-cyclohexyl-3-aminopyridine as a white solid. <sup>1</sup>H NMR (CDCl<sub>3</sub>) δ 7.91 (d, *J* = 2.4 Hz, 1 H), 7.81 (dd, *J* = 4.8, 1.4 Hz, 1 H), 6.95 (dd, *J* = 8.0, 4.8 Hz, 1 H), 6.75 (ddd, *J* = 8.0, 2.8, 1.2 Hz, 1 H), 3.73 (s, b, 1 H), 3.10-3.21 (m, 1 H), 1.94 (dd, *J* = 13.2, 3.2 Hz, 2 H), 1.67 (dt, *J* = 13.2, 3.6 Hz, 2 H), 1.56 (dd, *J* = 12.4, 3.6 Hz, 1 H), 1.22-1.33 (m, 2 H), 1.02-1.18 (m, 3 H); <sup>13</sup>C NMR (CDCl<sub>3</sub>) δ 143.25, 137.77, 136.09, 123.48, 118.39, 51.16, 32.94, 25.59, 24.68.

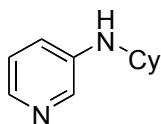

***N*-Cyclohexyl-3-aminopyridine.**<sup>1</sup> (Table 1, entry 19). The general procedure conducted with 3-iodopyridine (0.205 g, 1.00 mmol), cyclohexylamine (0.119 g, 1.20 mmol), Pd(OAc)<sub>2</sub> and CyPF-*t*-Bu (50.0 μL from stock solution A, 5.0 × 10<sup>-4</sup> mmol) and sodium *tert*-butoxide (0.135 g, 1.40 mmol) gave 137.5 mg (78%) of *N*-cyclohexyl-3-aminopyridine as a white solid. (<sup>1</sup>H and <sup>13</sup>C NMR spectra are the same as those for the product in Table 1, entry 18.)

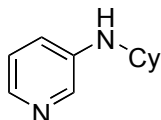

***N*-*tert*-Butyl-3-aminopyridine.**<sup>3</sup> (Table 1, entry 20). The general procedure A conducted with 3-chloropyridine (0.114 g, 1.00 mmol), *tert*-butylamine (87.8 mg, 1.20 mmol), Pd(OAc)<sub>2</sub> (2.2 mg, 1.0 × 10<sup>-2</sup> mmol) and CyPF-*t*-Bu (5.5 mg, 1.0 × 10<sup>-2</sup> mmol) gave 100.3 mg (67%) of *N*-*tert*-butyl-3-aminopyridine as a colorless liquid. <sup>1</sup>H NMR (CDCl<sub>3</sub>) δ 8.03 (s, 1 H), 7.91 (t, *J* = 3.0 Hz, 1 H), 6.98 (d, *J* = 3.2 Hz, 1 H), 6.97 (d, *J* = 3.6 Hz, 1 H), 3.55 (s, b, 1 H), 1.27 (s, 9 H); <sup>13</sup>C NMR (CDCl<sub>3</sub>) δ 142.89, 139.32, 139.03, 123.21, 122.42, 51.36, 29.66.

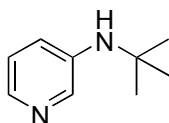

***N*-(3-Pyridyl)-α-methyl-benzylamine.** (Table 1, entry 21). The general procedure A conducted with 3-chloropyridine (0.114 g, 1.00 mmol), α-methyl-benzylamine (0.145 g, 1.20 mmol, 99 % ee), Pd(OAc)<sub>2</sub> and CyPF-*t*-Bu (50.0 μL from stock solution A, 5.0 × 10<sup>-4</sup> mmol) gave 181.3 mg (91%, 94.5% ee) of *N*-(3-pyridyl)-α-methyl-benzylamine. The ee was determined on Chiralcel OD-H column with hexane/2-propanol = 90/10, flow = 1.0 ml/min, wavelength = 254 nm. Retention time 15.83 mins (*S*-isomer), 33.17 mins (*R*-isomer). <sup>1</sup>H NMR (CDCl<sub>3</sub>) δ 7.90 (d, *J* = 2.8 Hz, 1 H), 7.78 (dd, *J* = 4.8, 1.2 Hz, 1 H), 7.09-7.24 (m, 5 H), 6.83 (dd, *J* = 8.4, 4.8 Hz, 1 H), 6.58 (ddd, *J* = 8.4, 2.8, 1.2 Hz, 1 H), 4.39 (s, b, 1 H), 4.30-4.38 (m, 1 H), 1.40 (d, *J* = 6.8 Hz, 3 H); <sup>13</sup>C NMR (CDCl<sub>3</sub>) 144.15, 143.18, 138.16, 136.33, 128.58, 126.93, 125.57, 123.41, 118.71, 53.03, 24.75. Anal. Calcd. For C<sub>13</sub>H<sub>14</sub>N<sub>2</sub>: C, 78.75; H, 7.12; N, 14.13. Found: C, 78.44; H, 7.35; N, 13.84.

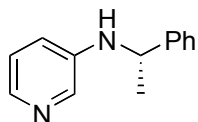

***N*-Octyl-4-aminopyridine.** (Table 1, entry 22). The general procedure A conducted with 4-chloropyridine hydrochloride (0.150 g, 1.00 mmol), octylamine (0.155 g, 1.20 mmol), Pd(OAc)<sub>2</sub> and CyPF-*t*-Bu (10.0 μL from stock solution A, 1.0 × 10<sup>-4</sup> mmol) gave 171.5 mg (83%) of *N*-octyl-4-aminopyridine as a yellow solid. <sup>1</sup>H NMR (CDCl<sub>3</sub>) δ 8.11 (d, *J* = 4.8 Hz, 2 H), 6.37 (d, *J* = 4.8 Hz, 2 H), 4.44 (s, b, 1 H), 3.08 (q, *J* = 7.2 Hz, 2 H), 1.55 (quint, *J* = 7.2 Hz, 2 H), 1.19-1.39 (m, 10 H), 0.84 (t, *J* = 7.2 Hz, 3 H); <sup>13</sup>C NMR (CDCl<sub>3</sub>) δ 153.50, 149.48, 107.18, 42.38, 31.59, 29.12, 29.02, 28.84, 26.85, 22.44, 13.89; Anal. Calcd. For C<sub>13</sub>H<sub>22</sub>N<sub>2</sub>: C, 75.68; H, 10.75; N, 13.58. Found: C, 75.45; H, 10.80; N, 13.62.

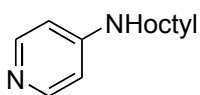

***N*-Octyl-4-aminopyridine. (Table 1, entry 23).** The general procedure A conducted with 4-bromopyridine hydrochloride (0.195 g, 1.00 mmol), octylamine (0.155 g, 1.20 mmol), Pd(OAc)<sub>2</sub> and CyPF-*t*-Bu (5.0 μL from stock solution A, 5.0 × 10<sup>-5</sup> mmol) gave 192.3 mg (93%) of *N*-octyl-4-aminopyridine as a white solid. (<sup>1</sup>H and <sup>13</sup>C NMR spectra are the same as those for the product in Table 1, entry 22.)

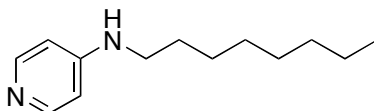

***N*-Octyl-4-aminopyridine. (Table 1, entry 24).** The general procedure A conducted with 4-iodopyridine (0.205 g, 1.00 mmol), octylamine (0.155 g, 1.20 mmol), Pd(OAc)<sub>2</sub> and CyPF-*t*-Bu (50.0 μL from stock solution A, 5.0 × 10<sup>-4</sup> mmol) and sodium *tert*-butoxide (0.135 g, 1.40 mmol) gave 164.6 mg (80%) of *N*-octyl-4-aminopyridine as a yellow solid. (<sup>1</sup>H and <sup>13</sup>C NMR spectra are the same as those for the product in Table 1, entry 22.)

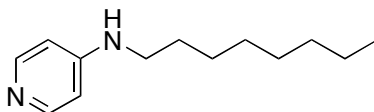

**4-Benzamidopyridine.<sup>4</sup> (Table 1, entry 25).** The same procedure A conducted with 4-chloropyridine hydrochloride (0.150 g, 1.00 mmol), benzamide (0.145 g, 1.20 mmol), Pd(OAc)<sub>2</sub> (2.2 mg, 1.0 × 10<sup>-2</sup> mmol) and CyPF-*t*-Bu (5.5 mg, 1.0 × 10<sup>-2</sup> mmol) gave 148.5 mg (75%) of 4-benzamidopyridine as a white solid. <sup>1</sup>H NMR (CD<sub>3</sub>COCD<sub>3</sub>) δ 9.82 (s, b, 1 H), 8.48 (d, *J* = 6.4 Hz, 2 H), 8.00 (dt, *J* = 7.2, 2.0 Hz, 2 H), 7.81 (dd, *J* = 6.8, 2.0 Hz, 2 H), 7.60 (tt, *J* = 7.2, 1.4 Hz, 1 H), 7.52 (tt, *J* = 7.6, 1.2 Hz, 2 H); <sup>13</sup>C NMR (CD<sub>3</sub>COCD<sub>3</sub>) δ 166.95, 151.20, 146.76, 135.36, 132.74, 129.24, 128.34, 114.54.

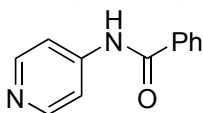

***N*-Octylaminopyrazine. (Table 1, entry 26).** The general procedure A conducted with chloropyrazine (0.115 g, 1.00 mmol), octylamine (0.155 g, 1.20 mmol), Pd(OAc)<sub>2</sub> and CyPF-*t*-Bu (5.0 μL from stock solution A, 5.0 × 10<sup>-5</sup> mmol) gave 170.0 mg (82%) of *N*-octylaminopyrazine as a pale yellow solid. <sup>1</sup>H NMR (CDCl<sub>3</sub>) δ 7.89 (dd, *J* = 2.8, 1.6 Hz, 1 H), 7.80 (d, *J* = 1.6 Hz, 1 H), 7.69 (d, *J* = 2.8 Hz, 1 H), 4.94 (s, b, 1 H), 3.24 (q, *J* = 6.7 Hz, 2 H), 1.54 (quint, *J* = 7.3 Hz, 2 H), 1.20-1.42 (m, 10 H), 0.80 (t, *J* = 6.8 Hz, 3 H); <sup>13</sup>C NMR (CDCl<sub>3</sub>) δ 154.70, 141.83, 132.16, 131.72, 41.40, 31.65, 29.28, 29.17, 29.09, 26.87, 22.50, 13.96; Anal. Calcd. For C<sub>12</sub>H<sub>21</sub>N<sub>3</sub>: C, 69.52; H, 10.21; N, 20.27. Found: C, 69.58; H, 10.26; N, 20.45.

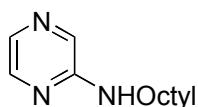

***N*-Octylaminopyrazine. (Table 1, entry 27).** The general procedure A conducted with iodopyrazine (0.206 g, 1.00 mmol), octylamine (0.155 g, 1.20 mmol), Pd(OAc)<sub>2</sub> and CyPF-*t*-Bu (50.0 μL from stock



solution **A**,  $5.0 \times 10^{-45}$  mmol) gave 172.1 mg (83%) of *N*-octylaminopyrazine as a pale yellow solid. ( $^1\text{H}$  and  $^{13}\text{C}$  NMR spectra are the same as those for the product in Table 1, entry 26.)

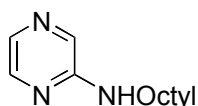

**5-(Cyclohexylamino)pyrimidine.**<sup>5</sup> (Table 1, entry 28). The general procedure A conducted with 5-bromopyrimidine (0.158 g, 1.00 mmol), cyclohexylamine (0.119 g, 1.20 mmol), Pd(OAc)<sub>2</sub> (2.2 mg, 1.0 mmol) and CyPF-*t*-Bu (5.5 mg, 1.0 mmol) gave 141.2 mg (80%) of 5-(cyclohexylamino)pyrimidine as a pale yellow plate.  $^1\text{H}$  NMR (CDCl<sub>3</sub>)  $\delta$  8.53 (s, 1 H), 8.07 (s, 2 H), 3.63 (s, b, 1 H), 3.23-3.30 (m, 1 H), 2.03-2.06 (m, 2 H), 1.65-1.80 (m, 3 H), 1.15-1.43 (m, 5 H);  $^{13}\text{C}$  NMR (CDCl<sub>3</sub>)  $\delta$  148.01, 140.96, 105.28, 51.12, 32.94, 25.58, 24.66.

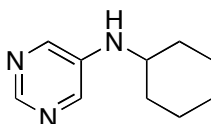

***N*-Cyclohexyl-2-aminoquinoline.** (Table 1, entry 29). The general procedure A conducted with 2-chloroquinoline (0.163 g, 1.00 mmol), cyclohexylamine (0.119 g, 1.20 mmol), Pd(OAc)<sub>2</sub> and CyPF-*t*-Bu (10.0  $\mu\text{L}$  from stock solution **A**,  $1.0 \times 10^{-4}$  mmol) gave 138.4 mg (79%) of *N*-cyclohexyl-2-aminoquinoline as a white solid.  $^1\text{H}$  NMR (CDCl<sub>3</sub>)  $\delta$  7.67 (d,  $J = 9.2$  Hz, 1 H), 7.56 (dd,  $J = 8.4, 0.4$  Hz, 1 H), 7.45 (dd,  $J = 8.4, 1.2$  Hz, 1 H), 7.40 (d,  $J = 8.8$  Hz, 1 H), 7.07 (ddd,  $J = 8.0, 7.0, 1.2$  Hz, 1 H), 6.50 (d,  $J = 8.8$  Hz, 1 H), 4.66 (d,  $J = 8.0$  Hz, 1 H), 3.71-3.78 (m, 1 H), 1.97-2.01 (m, 2 H), 1.66 (dt,  $J = 13.6, 4.9$  Hz, 2 H), 1.55 (dt,  $J = 13.2, 4.9$  Hz, 1 H), 1.27-1.38 (m, 2 H), 1.06-1.17 (m, 3 H);  $^{13}\text{C}$  NMR (CDCl<sub>3</sub>)  $\delta$  156.26, 148.15, 137.14, 129.34, 127.28, 125.85, 123.17, 121.60, 111.02, 49.70, 33.38, 25.66, 24.82; Anal. Calcd. For C<sub>15</sub>H<sub>18</sub>N<sub>2</sub>: C, 79.61; H, 8.02; N, 12.38. Found: C, 79.49; H, 8.03; N, 12.23.

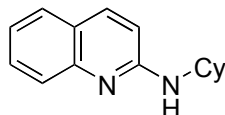

***N*-Octyl-1-aminoisoquinoline.** (Table 1, entry 30). The general procedure A conducted with 1-chloroisoquinoline (0.164 g, 1.00 mmol), octylamine (0.155 g, 1.20 mmol), Pd(OAc)<sub>2</sub> and CyPF-*t*-Bu (5.0  $\mu\text{L}$  from stock solution **A**,  $5.0 \times 10^{-5}$  mmol) gave 233.8 mg (91%) of *N*-octyl-1-aminoisoquinoline as a pale yellow liquid.  $^1\text{H}$  NMR (CDCl<sub>3</sub>)  $\delta$  7.98 (d,  $J = 6.0$  Hz, 1 H), 7.72 (d,  $J = 7.6$  Hz, 1 H), 7.65 (d,  $J = 8.4$  Hz, 1 H), 7.56 (dd,  $J = 8.0, 6.8$  Hz, 1 H), 7.43 (dd,  $J = 8.2, 6.8$  Hz, 1 H), 6.89 (d,  $J = 5.6$  Hz, 1 H), 5.16 (s, b, 1 H), 3.58 (q,  $J = 7.6$  Hz, 2 H), 1.72 (quint,  $J = 7.6$  Hz, 2 H), 1.45 (quint,  $J = 7.6$  Hz, 2 H), 1.23-1.37 (m, 8 H), 0.86 (t,  $J = 6.8$  Hz, 3 H);  $^{13}\text{C}$  NMR (CDCl<sub>3</sub>)  $\delta$  155.07, 141.22, 136.82, 129.32, 126.87, 125.49, 121.25, 117.96, 110.32, 41.77, 31.66, 29.43, 29.27, 29.11, 27.09, 22.49, 13.95; Anal. Calcd. For C<sub>17</sub>H<sub>24</sub>N<sub>2</sub>: C, 79.64; H, 9.44; N, 10.93. Found: C, 79.56; H, 9.57; N, 10.90.

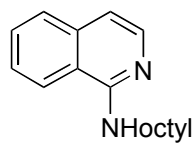

***N*-Octyl-4-amino-isoquinoline.** (Table 1, entry 31). The general procedure A conducted with 4-bromo-*iso*quinoline (0.208 g, 1.00 mmol), cyclohexylamine (0.155 g, 1.20 mmol), Pd(OAc)<sub>2</sub> and

CyPF-*t*-Bu (5.0  $\mu$ L from stock solution **A**,  $5.0 \times 10^{-5}$  mmol) gave 237.0 mg (93%) of *N*-Octyl-4-amino-isoquinoline as a white solid.  $^1\text{H}$  NMR ( $\text{CDCl}_3$ )  $\delta$  8.65 (s, 1 H), 7.86 (d,  $J = 8.0$  Hz, 1 H), 7.84 (s, 1 H), 7.75 (d,  $J = 8.5$  Hz, 1 H), 7.60 (t,  $J = 8.0$  Hz, 1 H), 7.53 (t,  $J = 7.5$  Hz, 1 H), 4.19 (s, 1 H), 3.27 (q,  $J = 7.0$  Hz, 2 H), 1.74 (quint,  $J = 8.0$  Hz, 2 H), 1.45 (quint,  $J = 7.0$  Hz, 2 H), 1.27-1.36 (m, 8 H), 0.87 (t,  $J = 7.0$  Hz, 3 H);  $^{13}\text{C}$  NMR ( $\text{CDCl}_3$ )  $\delta$  141.70, 137.84, 128.73, 128.38, 127.93, 126.76, 125.64, 123.26, 119.04, 43.87, 31.75, 29.35, 29.32, 29.19, 27.18, 22.59, 14.05. Anal. Calcd. For  $\text{C}_{17}\text{H}_{24}\text{N}_2$ : C, 79.64; H, 9.44; N, 10.93. Found: C, 79.52; H, 9.82; N, 10.90.

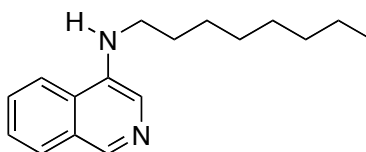

***N*-(Phenyl)cyclohexylamine.**<sup>6</sup> (Table 3, entry 1). The general procedure A conducted with phenylchloride (0.113 g, 1.00 mmol), cyclohexylamine (0.119 g, 1.20 mmol),  $\text{Pd}(\text{OAc})_2$  and CyPF-*t*-Bu (5.0  $\mu$ L from stock solution **A**,  $5.0 \times 10^{-5}$  mmol) gave 174.7 mg (99%) of *N*-(phenyl)cyclohexylamine as a pale yellow liquid.  $^1\text{H}$  NMR ( $\text{CDCl}_3$ )  $\delta$  7.05 (t,  $J = 7.6$  Hz, 2 H), 6.56 (td,  $J = 7.2, 1.2$  Hz, 1 H), 6.48 (dd,  $J = 7.6, 0.8$  Hz, 2 H), 3.38 (s, b, 1 H), 3.11-3.18 (m, 1 H), 1.94-1.97 (m, 2 H), 1.66 (dt,  $J = 13.2, 4.0$  Hz, 2 H), 1.55 (dt,  $J = 12.0, 3.6$  Hz, 1 H), 1.22-1.32 (m, 2 H), 0.99-1.18 (m, 3 H);  $^{13}\text{C}$  NMR ( $\text{CDCl}_3$ )  $\delta$  147.31, 129.16, 116.71, 113.02, 51.56, 33.39, 25.88, 24.96.

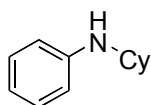

***N*-cyclohexyl-aniline.**<sup>6</sup> (Table 3, entry 2). The general procedure A conducted with phenyl bromide (0.157 g, 1.00 mmol), cyclohexylamine (0.119 g, 1.20 mmol),  $\text{Pd}(\text{OAc})_2$  and CyPF-*t*-Bu (10.0  $\mu$ L from stock solution **A**,  $1.0 \times 10^{-4}$  mmol) gave 168.9 mg (96%) of *N*-cyclohexyl-aniline as a white solid. ( $^1\text{H}$  and  $^{13}\text{C}$  NMR spectra are the same as those for the product in Table 3, entry 1.)

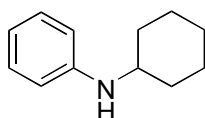

***N*-(Phenyl)benzylamine.**<sup>6</sup> (Table 3, entry 3). The general procedure A conducted with phenyl chloride (0.113 g, 1.00 mmol), benzylamine (0.129 g, 1.20 mmol),  $\text{Pd}(\text{OAc})_2$  and CyPF-*t*-Bu (5.0  $\mu$ L from stock solution **A**,  $5.0 \times 10^{-5}$  mmol) gave 183.0 mg (99%) of *N*-(Phenyl)benzylamine as a pale yellow liquid.  $^1\text{H}$  NMR ( $\text{CDCl}_3$ )  $\delta$  7.49 (d,  $J = 6.0$  Hz, 2 H), 7.46 (d,  $J = 7.2$  Hz, 2 H), 7.38-7.41 (m, 1 H), 7.30 (t,  $J = 7.2$  Hz, 2 H), 6.86 (td,  $J = 7.2, 1.2$  Hz, 1 H), 6.74 (dd,  $J = 7.6, 1.2$  Hz, 2 H), 4.42 (s, 2 H), 4.09 (s, b, 1 H);  $^{13}\text{C}$  NMR ( $\text{CDCl}_3$ )  $\delta$  148.04, 139.36, 129.15, 128.51, 127.37, 127.09, 117.41, 112.73, 48.13.

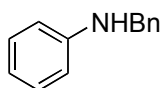

***N*-Benzylaniline.**<sup>6</sup> (Table 3, entry 4). The general procedure A conducted with phenyl bromide (0.157 g, 1.00 mmol), benzylamine (0.129 g, 1.20 mmol),  $\text{Pd}(\text{OAc})_2$  and CyPF-*t*-Bu (100.0  $\mu$ L from stock

solution **B**,  $1.0 \times 10^{-5}$  mmol) gave 178.1 mg (97%) of *N*-Benzylaniline as a white solid. ( $^1\text{H}$  and  $^{13}\text{C}$  NMR spectra are the same as those for the product in Table 3, entry 3.)

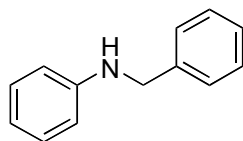

***N*-(*o*-Tolyl)octylamine. (Table 3, entry 5).** The general procedure A conducted with 2-chlorotoluene (0.127 g, 1.00 mmol), octylamine (0.155 g, 1.20 mmol),  $\text{Pd}(\text{OAc})_2$  and CyPF-*t*-Bu (10.0  $\mu\text{L}$  from stock solution **A**,  $1.0 \times 10^{-4}$  mmol) gave 214.1 mg (98%) of *N*-(*o*-tolyl)octylamine as a yellow solid.  $^1\text{H}$  NMR ( $\text{CDCl}_3$ )  $\delta$  7.20 (t,  $J = 7.6$  Hz, 1 H), 7.12 (d,  $J = 7.2$  Hz, 1 H), 6.72 (d,  $J = 7.4$  Hz, 1 H), 6.69 (d,  $J = 8.0$  Hz, 1 H), 3.50 (s, b, 1 H), 3.22 (t,  $J = 7.2$  Hz, 2 H), 2.21 (s, 3 H), 1.74 (quint,  $J = 7.3$  Hz, 2 H), 1.38-1.52 (m, 10 H), 0.99 (t,  $J = 7.2$  Hz, 3 H);  $^{13}\text{C}$  NMR ( $\text{CDCl}_3$ )  $\delta$  146.35, 129.92, 127.07, 121.55, 116.53, 109.52, 43.91, 31.82, 29.59, 29.42, 29.26, 27.23, 22.65, 17.38, 14.00; Anal. Calcd. For  $\text{C}_{15}\text{H}_{25}\text{N}$ : C, 82.13; H, 11.94; N, 6.39. Found: C, 82.23; H, 11.67; N, 6.10.

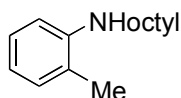

***N*-(*o*-Tolyl)octylamine. (Table 3, entry 6).** The general procedure A conducted with 2-bromotoluene (0.171 g, 1.00 mmol), octylamine (0.155 g, 1.20 mmol),  $\text{Pd}(\text{OAc})_2$  and CyPF-*t*-Bu (5.0  $\mu\text{L}$  from stock solution **A**,  $5.0 \times 10^{-5}$  mmol) gave 218.4 mg (99%) of *N*-(*o*-tolyl)octylamine as a yellow solid. ( $^1\text{H}$  and  $^{13}\text{C}$  NMR spectra are the same as those for the product in Table 3, entry 5.)

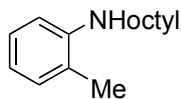

***N*-(*o*-Tolyl)octylamine. (Table 3, entry 7).** The general procedure conducted with 2-iodotoluene (0.218 g, 1.00 mmol), octylamine (0.155 g, 1.20 mmol),  $\text{Pd}(\text{OAc})_2$  and CyPF-*t*-Bu (50.0  $\mu\text{L}$  from stock solution **A**,  $5.0 \times 10^{-4}$  mmol) and sodium *tert*-butoxide (0.135 g, 1.40 mmol) gave 203.7 mg (93%) of *N*-(*o*-tolyl)octylamine as a yellow solid. ( $^1\text{H}$  and  $^{13}\text{C}$  NMR spectra are the same as those for the product in Table 3, entry 5.)

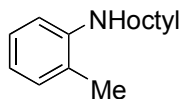

***N*-(Cyclohexylamino)-*o*-anisidine. (Table 3, entry 8).** The general procedure A conducted with 2-bromoanisole (0.187 g, 1.00 mmol), cyclohexylamine (0.119 g, 1.20 mmol),  $\text{Pd}(\text{OAc})_2$  and CyPF-*t*-Bu (50.0  $\mu\text{L}$  from stock solution **A**,  $5.0 \times 10^{-4}$  mmol) gave 192.0 mg (94%) of *N*-(cyclohexylamino)-*o*-anisidine as a pale yellow liquid.  $^1\text{H}$  NMR ( $\text{CDCl}_3$ )  $\delta$  6.88 (td,  $J = 8.0, 1.6$  Hz, 1 H), 6.78 (dd,  $J = 8.4, 1.2$  Hz, 1 H), 6.23-6.67 (m, 2 H), 4.17 (s, b, 1 H), 3.86 (s, 3 H), 3.28 (tt,  $J = 10.0, 3.8$  Hz, 1 H), 2.10 (dd,  $J = 12.0, 3.0$  Hz, 2 H), 1.80 (dt,  $J = 12.8, 3.6$  Hz, 2 H), 1.68 (dt,  $J = 12.8, 4.0$  Hz, 1 H), 1.35-1.46 (m, 2 H), 1.18-1.31 (m, 3 H);  $^{13}\text{C}$  NMR ( $\text{CDCl}_3$ )  $\delta$  146.62, 137.19, 121.16, 115.67, 110.09, 109.47,

55.28, 51.25, 33.37, 25.96, 25.03; Anal. Calcd. For C<sub>13</sub>H<sub>19</sub>N<sub>2</sub>O: C, 76.06; H, 9.33; N, 6.82. Found: C, 76.04; H, 9.32; N, 6.71.

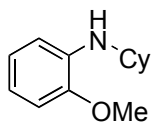

***N-p*-Tolyl-*iso*-butylamine.**<sup>7</sup> (Table 3, entry 9). The general procedure A conducted with 4-chlorotoluene (0.127 g, 1.00 mmol), *iso*-butylamine (87.8 mg, 1.20 mmol), Pd(OAc)<sub>2</sub> and CyPF-*t*-Bu (50.0 μL from stock solution A, 5.0 × 10<sup>-4</sup> mmol) gave 135.5 mg (83%) of *N-p*-tolyl-*iso*-butylamine as a pale yellow liquid. <sup>1</sup>H NMR (CDCl<sub>3</sub>) δ 6.99 (d, *J* = 8.0 Hz, 2 H), 6.54 (d, *J* = 7.8 Hz, 2 H), 3.47 (s, b, 1 H), 2.92 (d, *J* = 6.8 Hz, 2 H), 2.25 (s, 3 H), 1.78 (nonet, *J* = 6.8 Hz, 1 H), 0.99 (d, *J* = 6.8 Hz, 6 H); <sup>13</sup>C NMR (CDCl<sub>3</sub>) δ 146.29, 129.66, 126.11, 112.83, 52.20, 27.97, 20.46, 20.33.

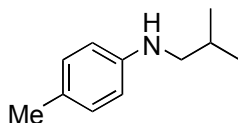

***N-p*-Tolyl-*iso*-butylamine.** (Table 3, entry 10). The general procedure A conducted with 4-bromotoluene (0.171 g, 1.00 mmol), *iso*-butylamine (87.8 mg, 1.20 mmol), Pd(OAc)<sub>2</sub> and CyPF-*t*-Bu (50.0 μL from stock solution A, 5.0 × 10<sup>-4</sup> mmol) gave 147.1 mg (90%) of *N-p*-tolyl-*iso*-butylamine as a pale yellow liquid. (<sup>1</sup>H and <sup>13</sup>C NMR spectra are the same as those for the product in Table 3, entry 9.)

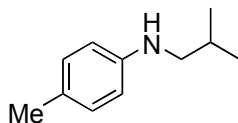

***N-p*-Tolyl-*iso*-butylamine.** (Table 3, entry 11). The general procedure conducted with 4-iodotoluene (0.218 g, 1.00 mmol), *iso*-butylamine (87.8 mg, 1.20 mmol), Pd(OAc)<sub>2</sub> and CyPF-*t*-Bu (50.0 μL from stock solution A, 5.0 × 10<sup>-4</sup> mmol) and sodium *tert*-butoxide (0.135 g, 1.40 mmol) gave 122.5 mg (75%) of *N-p*-tolyl-*iso*-butylamine as a pale yellow liquid. (<sup>1</sup>H and <sup>13</sup>C NMR spectra are the same as those for the product in Table 3, entry 9.)

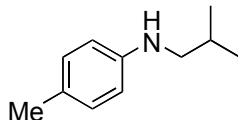

***N-p*-Tolyl-*iso*-butylamine.** (Table 3, entry 12). The general procedure conducted with 4-iodotoluene (5.50 g, 25.0 mmol), *iso*-butylamine (2.20 g, 30.0 mmol), Pd(OAc)<sub>2</sub> (1.1 mg, 0.50 mmol) and CyPF-*t*-Bu (2.7 mg, 0.50 mmol) and sodium *tert*-butoxide (3.38 g, 35.0 mmol) gave 3.30 g (81%) of *N-p*-tolyl-*iso*-butylamine as a pale yellow liquid. (<sup>1</sup>H and <sup>13</sup>C NMR spectra are the same as those for the product in Table 3, entry 9.)

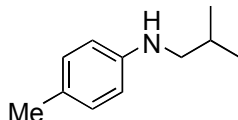

***N*-(*p*-Tolyl)-*sec*-butylamine. (Table 3, entry 13).** The general procedure A conducted with 4-bromotoluene (0.171 g, 1.00 mmol), *sec*-butylamine (87.8 mg, 1.20 mmol), Pd(OAc)<sub>2</sub> and CyPF-*t*-Bu (50.0 μL from stock solution A, 5.0 × 10<sup>-4</sup> mmol) gave 142.2 mg (87%) of *N*-(*p*-tolyl)-*sec*-butylamine as a colorless liquid. <sup>1</sup>H NMR (CDCl<sub>3</sub>) δ 7.01 (d, *J* = 8.4 Hz, 2 H), 6.65 (dd, *J* = 8.4 Hz, 2 H), 3.40 (sext, *J* = 6.0 Hz, 1 H), 3.22 (s, b, 1 H), 2.27 (s, 3 H), 1.63 (sept, *J* = 6.0 Hz, 1 H), 1.49 (sept, *J* = 7.0 Hz, 1 H), 1.19 (d, *J* = 6.4 Hz, 3 H), 0.98 (t, *J* = 7.2 Hz, 3 H); <sup>13</sup>C NMR (CDCl<sub>3</sub>) δ 145.40, 129.70, 125.91, 113.33, 50.04, 29.59, 20.30, 20.22, 10.32; Anal. Calcd. For C<sub>11</sub>H<sub>17</sub>N: C, 80.93; H, 10.50; N, 8.58. Found: C, 80.71; H, 10.24; N, 8.66.

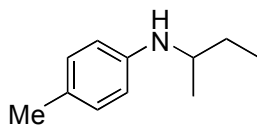

***N*-(*p*-Tolyl)-*sec*-butylamine. (Table 3, entry 14).** The general procedure conducted with 4-iodotoluene (0.218 g, 1.00 mmol), *sec*-butylamine (87.8 mg, 1.20 mmol), Pd(OAc)<sub>2</sub> (1.1 mg, 0.50 mmol%) and CyPF-*t*-Bu (2.7 mg, 0.50 mmol%) and sodium *tert*-butoxide (0.135 g, 1.40 mmol) gave 133.8 mg (82%) of *N*-(*p*-tolyl)-*sec*-butylamine as a colorless liquid. (<sup>1</sup>H and <sup>13</sup>C NMR spectra are the same as those for the product in Table 3, entry 13.)

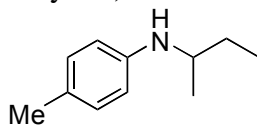

***N*-(4-Methoxyphenyl)octylamine. (Table 3, entry 15).** The general procedure A conducted with 4-chloroanisole (0.143 g, 1.00 mmol), octylamine (0.155 g, 1.20 mmol), Pd(OAc)<sub>2</sub> and CyPF-*t*-Bu (100.0 μL from stock solution A, 1.0 × 10<sup>-3</sup> mmol) gave 217.2 mg (92%) of *N*-(4-methoxyphenyl)octylamine as a pale yellow liquid. <sup>1</sup>H NMR (CDCl<sub>3</sub>) δ 6.68 (d, *J* = 6.4 Hz, 2 H), 6.47 (d, *J* = 6.8 Hz, 2 H), 3.63 (s, 3 H), 3.17 (s, b, 1 H), 2.94 (t, *J* = 7.0 Hz, 2 H), 1.49 (quint, *J* = 7.0 Hz, 2 H), 1.20-1.28 (m, 10 H), 0.80 (t, *J* = 6.8 Hz, 3 H); <sup>13</sup>C NMR (CDCl<sub>3</sub>) δ 151.77, 142.76, 114.71, 113.83, 55.60, 44.88, 31.75, 29.58, 29.37, 29.20, 27.13, 22.58, 14.02. Anal. Calcd. For C<sub>15</sub>H<sub>25</sub>NO: C, 76.55; H, 10.71; N, 5.95. Found: C, 76.46; H, 10.41; N, 6.04.

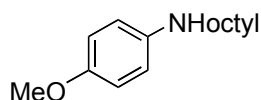

***N*-(4-Methoxyphenyl)octylamine. (Table 3, entry 16).** The general procedure conducted with 4-iodoanisole (0.234 g, 1.00 mmol), octylamine (0.155 g, 1.20 mmol), Pd(OAc)<sub>2</sub> (2.2 mg, 1.0 mmol%) and CyPF-*t*-Bu (5.5 mg, 1.0 mmol%) and sodium *tert*-butoxide (0.135 g, 1.40 mmol) gave 158.3 mg (67%) of *N*-(4-methoxyphenyl)octylamine as a pale yellow liquid. (<sup>1</sup>H and <sup>13</sup>C NMR spectra are the same as those for the product in Table 3, entry 15.)

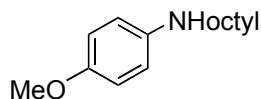

***N*-(4-Cyano phenyl)-*iso*-butylamine. (Table 3, entry 17).** The general procedure A conducted with 4-cyano-1-chlorobenzene (0.138 g, 1.00 mmol), *iso*-butylamine (87.8 mg, 1.20 mmol), Pd(OAc)<sub>2</sub> and CyPF-*t*-Bu (5.0 μL from stock solution A, 5.0 × 10<sup>-5</sup> mmol) gave 156.0 mg (90%) of *N*-(4-cyanoxyphenyl)-*iso*-butylamine as a pale yellow liquid. <sup>1</sup>H NMR (CDCl<sub>3</sub>) δ 7.27 (d, *J* = 8.8 Hz, 2 H), 7.46 (d, *J* = 8.8 Hz, 2 H), 4.32 (s, b, 1 H), 2.87 (d, *J* = 6.8 Hz, 2 H), 1.80 (nonet, *J* = 6.8 Hz, 1 H), 0.89

(d,  $J = 6.8$  Hz, 6 H);  $^{13}\text{C}$  NMR ( $\text{CDCl}_3$ )  $\delta$  151.74, 133.43, 120.38, 112.01, 98.00, 50.86, 27.90, 20.12; Anal. Calcd. For  $\text{C}_{11}\text{H}_{14}\text{N}_2$ : C, 75.82; H, 8.10; N, 16.08. Found: C, 75.96; H, 8.03; N, 16.01.

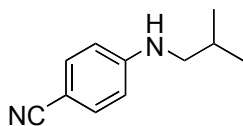

***N*-(4-Cyanophenyl)-cyclohexylamine. (Table 3, entry 18).** The general procedure A conducted with 4-cyano-1-bromobenzene (0.182 g, 1.00 mmol), cyclohexylamine (0.119 g, 1.20 mmol),  $\text{Pd}(\text{OAc})_2$  and  $\text{CyPF-}t\text{-Bu}$  (5.0  $\mu\text{L}$  from stock solution A,  $5.0 \times 10^{-5}$  mmol) gave 184.2 mg (92%) of *N*-(4-Cyanophenyl)-cyclohexylamine as a pale yellow liquid.  $^1\text{H}$  NMR ( $\text{CDCl}_3$ )  $\delta$  7.34 (d,  $J = 8.4$  Hz, 2 H), 6.49 (d,  $J = 8.4$  Hz, 2 H), 4.21 (d,  $J = 7.6$  Hz, 1 H), 3.21-3.29 (m, 1 H), 1.97-2.01 (m, 2 H), 1.74 (dt,  $J = 13.2, 4.0$  Hz, 2 H), 1.63 (dt,  $J = 12.8, 4.0$  Hz, 1 H), 1.29-1.40 (m, 2 H), 1.11-1.26 (m, 3 H);  $^{13}\text{C}$  NMR ( $\text{CDCl}_3$ )  $\delta$  150.42, 133.58, 120.66, 112.19, 97.47, 51.08, 32.80, 25.54, 24.70. Anal. Calcd. For  $\text{C}_{13}\text{H}_{16}\text{N}_2$ : C, 77.96; H, 8.05; N, 13.99. Found: C, 77.85; H, 8.08; N, 13.78.

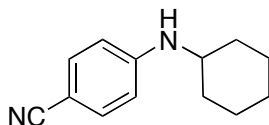

***N*-(Benzylamino)-*m*-anisidine. (Table 3, entry 19).** The general procedure A conducted with 3-chloroanisole (0.143 g, 1.00 mmol), benzylamine (0.129 g, 1.20 mmol),  $\text{Pd}(\text{OAc})_2$  and  $\text{CyPF-}t\text{-Bu}$  (5.0  $\mu\text{L}$  from stock solution A,  $5.0 \times 10^{-5}$  mmol) gave 208.0 mg (98%) of *N*-(benzylamino)-*m*-anisidine as a pale yellow liquid.  $^1\text{H}$  NMR ( $\text{CDCl}_3$ )  $\delta$  7.45 (dd,  $J = 8.4, 2.0$  Hz, 2 H), 7.42 (t,  $J = 7.6$  Hz, 2 H), 7.36 (tt,  $J = 6.4, 2.0$  Hz, 1 H), 7.17 (t,  $J = 8.0$  Hz, 1 H), 6.39 (dd,  $J = 8.0, 1.6$  Hz, 1 H), 6.34 (dd,  $J = 8.0, 1.6$  Hz, 1 H), 6.28 (t,  $J = 1.6$  Hz, 1 H), 4.37 (s, 2 H), 4.13 (s, b, 1 H), 3.81 (s, 3 H);  $^{13}\text{C}$  NMR ( $\text{CDCl}_3$ )  $\delta$  160.65, 149.42, 139.23, 129.84, 128.46, 127.33, 127.05, 105.80, 102.45, 98.70, 54.85, 48.06. Anal. Calcd. For  $\text{C}_{14}\text{H}_{15}\text{NO}$ : C, 78.84; H, 7.09; N, 6.57. Found: C, 78.83; H, 7.13; N, 6.54.

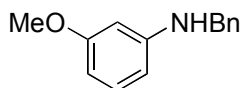

***N*-(Benzylamino)-*m*-anisidine. (Table 3, entry 20).** The general procedure conducted with 3-iodoanisole (0.234 g, 1.00 mmol), benzylamine (0.129 g, 1.20 mmol),  $\text{Pd}(\text{OAc})_2$  and  $\text{CyPF-}t\text{-Bu}$  (5.0  $\mu\text{L}$  from stock solution A,  $5.0 \times 10^{-5}$  mmol) and sodium *tert*-butoxide (0.135 g, 1.40 mmol) gave 211.6 mg (99%) of *N*-(benzylamino)-*m*-anisidine as a pale yellow liquid. ( $^1\text{H}$  and  $^{13}\text{C}$  NMR spectra are the same as those for the product in Table 3, entry 19.)

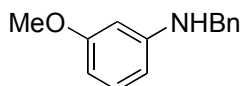

***N*-(Cyclohexylamino)-*m*-anisidine.<sup>8</sup> (Table 3, entry 21).** The general procedure A conducted with 3-bromoanisole (0.143 g, 1.00 mmol), cyclohexylamine (0.119 g, 1.20 mmol),  $\text{Pd}(\text{OAc})_2$  and  $\text{CyPF-}t\text{-Bu}$  (10.0  $\mu\text{L}$  from stock solution A,  $1.0 \times 10^{-4}$  mmol) gave 207.2 mg (99%) of *N*-(cyclohexylamino)-*m*-anisidine as a pale yellow liquid.  $^1\text{H}$  NMR ( $\text{CDCl}_3$ )  $\delta$  7.08 (t,  $J = 8.4$  Hz, 1 H), 6.26 (dd,  $J = 8.4, 2.0$  Hz, 1 H), 6.23 (dd,  $J = 8.0, 2.0$  Hz, 1 H), 6.18 (7,  $J = 2.0$  Hz, 1 H), 3.78 (s, 3 H), 3.52 (s, b, 1 H), 3.28 (tt,  $J = 10.0, 3.8$  Hz, 1 H), 2.08 (dd,  $J = 12.6, 3.0$  Hz, 2 H), 1.78 (dt,  $J = 13.2, 3.6$  Hz, 2 H), 1.67 (dt,  $J =$

12.4, 3.6 Hz, 1 H), 1.33-1.44 (m, 2 H), 1.25 (tt,  $J = 12.0, 3.6$  Hz, 1 H), 1.11-1.21 (m, 2 H);  $^{13}\text{C}$  NMR ( $\text{CDCl}_3$ )  $\delta$  160.74, 148.67, 129.82, 106.24, 101.61, 98.98, 54.90, 51.57, 33.32, 25.82, 24.92.

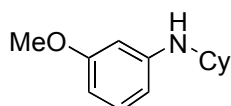

***N*-(Cyclohexylamino)-*m*-anisidine.**<sup>8</sup> (Table 3, entry 22). The general procedure conducted with 3-iodoanisole (0.234 g, 1.00 mmol), cyclohexylamine (0.119 g, 1.20 mmol),  $\text{Pd}(\text{OAc})_2$  and CyPF-*t*-Bu (50.0  $\mu\text{L}$  from stock solution A,  $5.0 \times 10^{-4}$  mmol) and sodium *tert*-butoxide (0.135 g, 1.40 mmol) gave 196.7 mg (94%) of *N*-(cyclohexylamino)-*m*-anisidine as a pale yellow liquid. ( $^1\text{H}$  and  $^{13}\text{C}$  NMR spectra are the same as those for the product in Table 3, entry 21.)

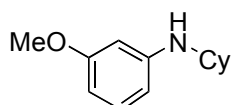

***N*-Octyl-1-aminonaphthalene.**<sup>9</sup> (Table 3, entry 23). The general procedure conducted with 1-iodonaphthalene (0.254 g, 1.00 mmol), octylamine (0.155 g, 1.20 mmol),  $\text{Pd}(\text{OAc})_2$  and CyPF-*t*-Bu (50.0  $\mu\text{L}$  from stock solution A,  $5.0 \times 10^{-4}$  mmol) and sodium *tert*-butoxide (0.135 g, 1.40 mmol) gave 249.9 mg (98%) of *N*-octyl-1-aminonaphthalene as a pale yellow solid.  $^1\text{H}$  NMR ( $\text{CDCl}_3$ )  $\delta$  7.81-7.84 (m, 2 H), 7.42-7.50 (m, 2 H), 7.39 (t,  $J = 8.0$  Hz, 1 H), 7.26 (d,  $J = 8.4$  Hz, 1 H), 6.64 (d,  $J = 7.6$  Hz, 1 H), 4.33 (s, br, 1 H), 3.28 (t,  $J = 7.2$  Hz, 2 H), 1.78 (quint,  $J = 7.6$  Hz, 2 H), 1.35-1.55 (m, 10 H), 0.95 (t,  $J = 7.2$  Hz, 3 H);  $^{13}\text{C}$  NMR ( $\text{CDCl}_3$ )  $\delta$  143.60, 134.26, 128.62, 126.65, 125.59, 124.52, 123.27, 119.74, 116.98, 104.11, 44.20, 31.85, 29.47, 29.41, 29.28, 27.36, 22.68, 14.12.

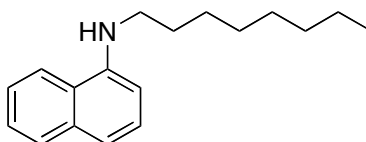

***N*-(isobutyl)-2-isopropylaniline.** (Table 3, entry 24). The general procedure A conducted with 1-bromo-2-isopropylbenzene (0.199 g, 1.00 mmol), *iso*-butylamine (87.8 mg, 1.20 mmol),  $\text{Pd}(\text{OAc})_2$  and CyPF-*t*-Bu (50.0  $\mu\text{L}$  from stock solution A,  $5.0 \times 10^{-4}$  mmol) gave 181.2 mg (95%) of *N*-(isobutyl)-2-isopropylaniline as a pale yellow liquid.  $^1\text{H}$  NMR ( $\text{CDCl}_3$ )  $\delta$  7.21 (dd,  $J = 7.5, 1.5$  Hz, 1 H), 7.17 (td,  $J = 7.5, 1.5$  Hz, 1 H), 6.78 (td,  $J = 7.5, 1.0$  Hz, 1 H), 6.62 (d,  $J = 7.5$  Hz, 1 H), 3.79 (s, b, 1 H), 3.03 (d,  $J = 6.5$  Hz, 2 H), 2.92 (hept,  $J = 7.0$  Hz, 1 H), 2.01 (hept,  $J = 6.5$  Hz, 1 H), 1.33 (d,  $J = 7.0$  Hz, 6 H), 1.08 (d,  $J = 6.5$  Hz, 6 H);  $^{13}\text{C}$  NMR ( $\text{CDCl}_3$ )  $\delta$  145.05, 131.67, 126.70, 124.80, 116.76, 110.15, 51.83, 27.89, 27.18, 22.18, 20.58.

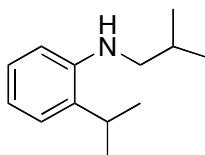

***N*-(2, 6-Xylyl)octylamine.** (Table 3, entry 25). The general procedure A conducted with 2, 6-dimethyl-1-chloro-benzene (0.141 g, 1.00 mmol), octylamine (0.155 g, 1.20 mmol),  $\text{Pd}(\text{OAc})_2$  and CyPF-*t*-Bu (100.0  $\mu\text{L}$  from stock solution A,  $1.0 \times 10^{-3}$  mmol) gave 226.3 mg (97%) of *N*-(2, 6-xylyl)octylamine as a yellow liquid.  $^1\text{H}$  NMR ( $\text{CDCl}_3$ )  $\delta$  7.10 (d,  $J = 7.6$  Hz, 2 H), 6.92 (t,  $J = 7.6$  Hz, 1 H), 3.10 (t,  $J = 7.2$  Hz, 2 H), 3.07 (s, b, 1 H), 2.41 (s, 6 H), 1.71 (quint,  $J = 7.2$  Hz, 2 H), 1.43-1.53 (m,

10 H), 1.04 (t,  $J = 6.8$  Hz, 3 H);  $^{13}\text{C}$  NMR ( $\text{CDCl}_3$ )  $\delta$  146.34, 128.91, 128.66, 121.41, 48.56, 31.77, 31.16, 29.46, 29.24, 27.13, 22.60, 18.43, 14.01; Anal. Calcd. For  $\text{C}_{16}\text{H}_{27}\text{N}$ : C, 82.34; H, 11.66; N, 6.00. Found: C, 82.16; H, 11.78; N, 5.94.

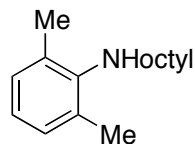

***N*-(2, 6-Xylyl)octylamine. (Table 3, entry 26).** The general procedure A conducted with 2, 6-dimethyl-1-chloro-benzene (0.185 g, 1.00 mmol), octylamine (0.155 g, 1.20 mmol),  $\text{Pd}(\text{OAc})_2$  and  $\text{CyPF-}t\text{-Bu}$  (50.0  $\mu\text{L}$  from stock solution **A**,  $5.0 \times 10^{-4}$  mmol) gave 228.3 mg (98%) of *N*-(2, 6-xylyl)octylamine as a yellow liquid. ( $^1\text{H}$  and  $^{13}\text{C}$  NMR spectra are the same as those for the product in Table 3, entry 25.)

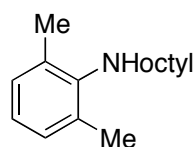

***N*-(2, 6-Xylyl)-*sec*butylamine. (Table 3, entry 27).** The general procedure A conducted with 2, 6-dimethyl-1-chloro-benzene (0.185 g, 1.00 mmol), *sec*-butylamine (87.8 mg, 1.20 mmol),  $\text{Pd}(\text{OAc})_2$  (1.1 mg,  $5.0 \times 10^{-3}$  mmol) and  $\text{CyPF-}t\text{-Bu}$  (2.8 mg,  $5.0 \times 10^{-3}$  mmol) gave 172.7 mg (97%) of *N*-(2, 6-Xylyl)-*sec*butylamine as a yellow liquid.  $^1\text{H}$  NMR ( $\text{CDCl}_3$ )  $\delta$  7.01 (d,  $J = 7.2$  Hz, 2 H), 6.82 (t,  $J = 7.2$  Hz, 1 H), 3.24 (sext,  $J = 6.4$  Hz, 1 H), 2.82 (s, 1 H), 2.30 (s, 6 H), 1.58-1.68 (m, 1 H), 1.37-1.48 (m, 1 H), 1.10 (d,  $J = 6.8$  Hz, 3 H), 1.00 (t,  $J = 7.2$  Hz, 3 H);  $^{13}\text{C}$  NMR ( $\text{CDCl}_3$ )  $\delta$  145.17, 128.86, 128.78, 121.02, 53.52, 30.90, 20.80, 19.03, 10.78. Anal. Calcd. For  $\text{C}_{12}\text{H}_{19}\text{N}$ : C, 81.30; H, 10.80; N, 7.90. Found: C, 81.37; H, 11.09; N, 8.14.

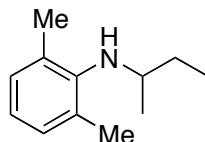

**General Procedure B for Catalytic Amination of Heteroaryl and Aryl Halides in Toluene.** The reaction conditions and average yields for each reaction are shown in Table 1 and 3. A typical procedure is given for the first entry in Table 5.

***N*-Octyl-2-aminopyridine. (Table 5, entry 1).** A solution of  $\text{Pd}(\text{OAc})_2$  and  $\text{CyPF-}t\text{-Bu}$  (10.0  $\mu\text{L}$  from stock solution **A**,  $1.0 \times 10^{-4}$  mmol) was added to a 4 mL vial containing 2-chloropyridine (0.114 g, 1.00 mmol) and sodium *tert*-butoxide (0.135 g, 1.40 mmol) in 1.0 mL of toluene. Octylamine (0.155 g, 1.20 mmol) was then added by syringe. The vial was sealed with a cap containing a PTFE septum, and the reaction mixture was stirred at 100  $^\circ\text{C}$  until 3-chloropyridine was consumed, as determined by GC. The reaction solution was directly adsorbed onto silica gel, and the product was isolated by eluting with hexane/ethyl acetate (85/15) to give 200.9 mg (98%) of *N*-octyl-2-aminopyridine as a yellow solid. ( $^1\text{H}$  and  $^{13}\text{C}$  NMR spectra are the same as those for the product in Table 1, entry 1.)

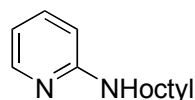



***N*-octyl-3-aminopyridine.** (Table 5, entry 2). The general procedure B conducted with 3-chloropyridine (0.114 g, 1.00 mmol), octylamine (0.155 g, 1.20 mmol), Pd(OAc)<sub>2</sub> and CyPF-*t*-Bu (50.0 μL from stock solution A, 5.0 × 10<sup>-4</sup> mmol) gave 210.0 mg (98%) of *N*-octyl-3-aminopyridine as a white solid. (<sup>1</sup>H and <sup>13</sup>C NMR spectra are the same as those for the product in Table 1, entry 11.)

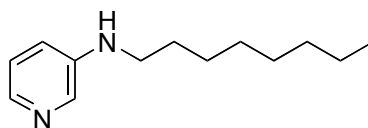

***N*-(3-Pyridinyl)-*p*-toluidine.** (Table 5, entry 3). The general procedure B conducted with 3-chloropyridine (0.114 g, 1.00 mmol), *p*-toluidine (0.130 g, 1.20 mmol), Pd(OAc)<sub>2</sub> and CyPF-*t*-Bu (100.0 μL from stock solution A, 1.0 × 10<sup>-3</sup> mmol) gave 121.1 mg (66%) of *N*-(3-pyridyl)-*p*-toluidine as a yellow solid. <sup>1</sup>H NMR (CDCl<sub>3</sub>) δ 8.34 (s, 1 H), 8.12 (d, *J* = 4.4 Hz, 1 H), 7.35 (t, *J* = 7.6 Hz, 1 H), 7.10-7.19 (m, 3 H), 7.02 (d, *J* = 8.0 Hz, 2 H), 5.75 (s, b, 1 H), 2.33 (s, 3 H); <sup>13</sup>C NMR (CDCl<sub>3</sub>) δ 140.79, 140.42, 139.10, 138.87, 131.46, 129.81, 123.56, 121.97, 119.02, 20.54; Anal. Calcd. For C<sub>12</sub>H<sub>12</sub>N<sub>2</sub>: C, 78.23; H, 6.57; N, 15.21. Found: C, 78.19; H, 6.61; N, 15.01.

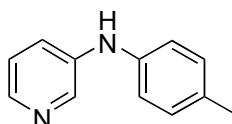

***N*-Phenyloctylamine.**<sup>10</sup> (Table 5, entry 4). The general procedure B conducted with phenyl chloride (0.113 g, 1.00 mmol), octylamine (0.155 g, 1.20 mmol), Pd(OAc)<sub>2</sub> and CyPF-*t*-Bu (50.0 μL from stock solution A, 5.0 × 10<sup>-4</sup> mmol) gave 203.8 mg (99%) of *N*-phenyloctylamine as a colorless liquid. <sup>1</sup>H NMR (CDCl<sub>3</sub>) δ 7.09 (tt, *J* = 7.2, 2.0 Hz, 2 H), 6.60 (tt, *J* = 7.2, 1.0 Hz, 1 H), 6.50 (dd, *J* = 7.2, 2.0 Hz, 2 H), 3.47 (s, b, 1 H), 3.00 (t, *J* = 7.2 Hz, 2 H), 1.52 (quint, *J* = 7.2 Hz, 2 H), 1.21-1.32 (m, 10 H), 0.82 (t, *J* = 6.8 Hz, 3 H); <sup>13</sup>C NMR (CDCl<sub>3</sub>) δ 148.45, 129.11, 116.94, 112.57, 43.90, 31.79, 29.51, 29.39, 29.23, 27.14, 22.62, 14.07.

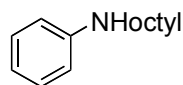

***N-p*-Tolyl-*iso*-butylamine.**<sup>7</sup> (Table 5, entry 5). The general procedure B conducted with 4-chlorotoluene (0.127 g, 1.00 mmol), *iso*-butylamine (87.8 mg, 1.20 mmol), Pd(OAc)<sub>2</sub> and CyPF-*t*-Bu (20.0 μL from stock solution A, 2.0 × 10<sup>-4</sup> mmol) gave 161.6 mg (99%) of *N-p*-tolyl-*iso*-butylamine as a pale yellow liquid. (<sup>1</sup>H and <sup>13</sup>C NMR spectra are the same as those for the product in Table 3, entry 9.)

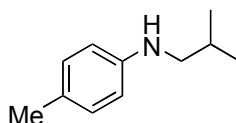

***N*-Octyl-2-aminopyridine.** (Table 5, entry 6). The general procedure B conducted with 2-bromopyridine (0.158 g, 1.00 mmol), octylamine (0.155 g, 1.20 mmol), Pd(OAc)<sub>2</sub> and CyPF-*t*-Bu (10.0 μL from stock solution A, 1.0 × 10<sup>-4</sup> mmol) gave 188.6 mg (92%) of *N*-octyl-2-aminopyridine as a yellow solid. (<sup>1</sup>H and <sup>13</sup>C NMR spectra are the same as those for the product in Table 1, entry 1.)

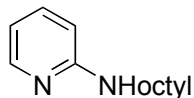

***N*-Benzyl-3-aminopyridine. (Table 5, entry 7).** The general procedure B conducted with 3-chloropyridine (0.114 g, 1.00 mmol), benzylamine (0.129 g, 1.20 mmol), Pd(OAc)<sub>2</sub> and CyPF-*t*-Bu (10.0 μL from stock solution A, 1.0 × 10<sup>-4</sup> mmol) gave 182.2 mg (99%) of *N*-benzyl-3-aminopyridine as a yellow solid. (<sup>1</sup>H and <sup>13</sup>C NMR spectra are the same as those for the product in Table 1, entry 14.)

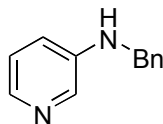

***N*-Benzylaniline. (Table 5, entry 8).** The general procedure B conducted with phenyl bromide (0.157 g, 1.00 mmol), benzylamine (0.129 g, 1.20 mmol), Pd(OAc)<sub>2</sub> and CyPF-*t*-Bu (5.0 μL from stock solution B, 5.0 × 10<sup>-5</sup> mmol) gave 181.8 mg (99%) of *N*-Benzylaniline as a white solid. (<sup>1</sup>H and <sup>13</sup>C NMR spectra are the same as those for the product in Table 3, entry 3.)

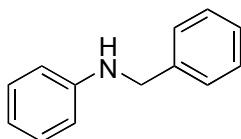

***N*-*iso*-Butyl-2-aminopyridine. (Table 5, entry 9).** The general procedure B conducted with 3-iodopyridine (0.125 g, 1.00 mmol), *iso*-butylamine (87.8 mg, 1.20 mmol), Pd(OAc)<sub>2</sub> and CyPF-*t*-Bu (200.0 μL from stock solution A, 2.0 × 10<sup>-3</sup> mmol) and sodium *tert*-butoxide (0.135 g, 1.40 mmol) gave 148.5 mg (99%) of *N*-*iso*-butyl-2-aminopyridine as a colorless liquid. (<sup>1</sup>H and <sup>13</sup>C NMR spectra are the same as those for the product in Table 1, entry 17.)

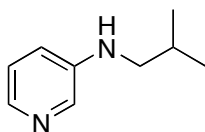

***N*-(Cyclohexylamino)-*o*-toluidine.<sup>11</sup> (Table 5, entry 10).** The general procedure B conducted with 2-iodotoluene (0.218 g, 1.00 mmol), cyclohexylamine (0.119 g, 1.20 mmol), Pd(OAc)<sub>2</sub> and CyPF-*t*-Bu (50.0 μL from stock solution A, 5.0 × 10<sup>-4</sup> mmol) and sodium *tert*-butoxide (0.135 g, 1.40 mmol) gave 175.0 mg (93%) of *N*-(cyclohexylamino)-*o*-toluidine as a yellow solid. <sup>1</sup>H NMR (CDCl<sub>3</sub>) δ 6.95-7.04 (m, 2 H), 6.52-6.56 (m, 2 H), 3.21-3.26 (m, 2 H), 2.04 (s, 3 H), 1.97-2.04 (m, 2 H), 1.56-1.71 (m, 3 H), 1.08-1.34 (m, 5 H); <sup>13</sup>C NMR (CDCl<sub>3</sub>) δ 145.18, 135.16, 126.96, 121.46, 116.17, 110.07, 51.38, 33.53, 25.93, 24.95, 17.46.

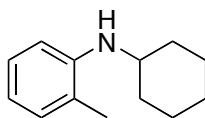

***N*-2-pyridyl-*p*-toluidine. (Table 6, entry 1).** The general procedure A conducted with 2-chloropyridine (0.114 g, 1.00 mmol), *p*-toluidine (0.129 g, 1.20 mmol), Pd(OAc)<sub>2</sub> and CyPF-*t*-Bu (100.0 μL from stock solution A, 1.0 × 10<sup>-3</sup> mmol) gave 158.8 mg (86%) of *N*-2-pyridyl-*p*-toluidine as

a white solid.  $^1\text{H}$  NMR ( $\text{CDCl}_3$ )  $\delta$  8.18 (dd,  $J = 5.2, 1.2$  Hz, 1 H), 7.47 (ddd,  $J = 8.6, 6.6, 1.6$  Hz, 1 H), 7.21 (d,  $J = 8.4$  Hz, 2 H), 7.15 (d,  $J = 8.4$  Hz, 2 H), 6.83 (d,  $J = 8.4$  Hz, 1 H), 6.70 (dd,  $J = 6.6, 5.4$  Hz, 1 H), 6.85 (s, br, 1 H), 2.34 (s, 3 H);  $^{13}\text{C}$  NMR ( $\text{CDCl}_3$ )  $\delta$  156.73, 148.02, 137.83, 137.59, 132.47, 129.68, 121.21, 114.14, 107.45, 20.71. Anal. Calcd. For  $\text{C}_{12}\text{H}_{12}\text{N}_2$ : C, 78.23; H, 6.57; N, 15.21. Found: C, 73.08; H, 6.50; N, 15.14.

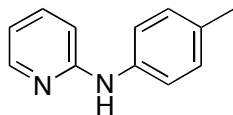

***N*-2-pyridyl-*p*-toluidine.** (Table 6, entry 2). The general procedure A conducted with 2-bromopyridine (0.158 g, 1.00 mmol), *p*-toluidine (0.129 g, 1.20 mmol),  $\text{Pd}(\text{OAc})_2$  and  $\text{CyPF-}t\text{-Bu}$  (50.0  $\mu\text{L}$  from stock solution A,  $5.0 \times 10^{-4}$  mmol) gave 175.4 mg (95%) of *N*-2-pyridyl-*p*-toluidine as a white solid. ( $^1\text{H}$  and  $^{13}\text{C}$  NMR spectra are the same as those for the product in Table 6, entry 1.)

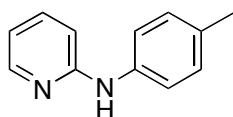

**2- $\alpha$ -Naphthylaminopyridine.**<sup>12</sup> (Table 6, entry 3). The general procedure A conducted with 2-chloropyridine (0.114 g, 1.00 mmol), 1-naphthylamine (0.172 g, 1.20 mmol),  $\text{Pd}(\text{OAc})_2$  and  $\text{CyPF-}t\text{-Bu}$  (50.0  $\mu\text{L}$  from stock solution A,  $5.0 \times 10^{-4}$  mmol) gave 214.9 mg (98%) of 2- $\alpha$ -naphthylaminopyridine as a colorless solid.  $^1\text{H}$  NMR ( $\text{CDCl}_3$ )  $\delta$  8.17 (d,  $J = 5.0$  Hz, 1 H), 8.10 (d,  $J = 8.5$  Hz, 1 H), 7.90 (d,  $J = 7.0$  Hz, 1 H), 7.72 (d,  $J = 8.5$  Hz, 1 H), 7.58 (d,  $J = 7.5$  Hz, 1 H), 7.39-7.54 (m, 4 H), 7.35 (s, b, 1 H), 6.69 (t,  $J = 5.0$  Hz, 1 H), 6.62 (d,  $J = 8.0$  Hz, 1 H);  $^{13}\text{C}$  NMR ( $\text{CDCl}_3$ )  $\delta$  157.85, 148.48, 137.73, 136.11, 134.69, 129.28, 128.46, 126.29, 126.16, 125.89, 125.28, 122.43, 120, 52, 114.59, 107.63.

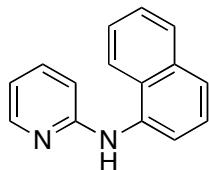

***N*-(3-Pyridinyl)-*p*-toluidine.** (Table 6, entry 4). The general procedure A conducted with 3-chloropyridine (0.114 g, 1.00 mmol), *p*-toluidine (0.130 g, 1.20 mmol),  $\text{Pd}(\text{OAc})_2$  and  $\text{CyPF-}t\text{-Bu}$  (50.0  $\mu\text{L}$  from stock solution A,  $5.0 \times 10^{-4}$  mmol) gave 181.6 mg (93%) of *N*-(3-pyridinyl)-*p*-toluidine as a yellow solid.  $^1\text{H}$  NMR ( $\text{CDCl}_3$ )  $\delta$  8.34 (s, 1 H), 8.12 (d,  $J = 4.4$  Hz, 1 H), 7.35 (t,  $J = 7.6$  Hz, 1 H), 7.10-7.19 (m, 3 H), 7.02 (d,  $J = 8.0$  Hz, 2 H), 5.75 (s, b, 1 H), 2.33 (s, 3 H);  $^{13}\text{C}$  NMR ( $\text{CDCl}_3$ )  $\delta$  140.79, 140.42, 139.10, 138.87, 131.46, 129.81, 123.56, 121.97, 119.02, 20.54; Anal. Calcd. For  $\text{C}_{12}\text{H}_{12}\text{N}_2$ : C, 78.23; H, 6.57; N, 15.21. Found: C, 78.19; H, 6.61; N, 15.01.

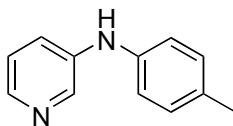

***N*-3-pyridyl-*o*-anisidine.** (Table 6, entry 5). The general procedure A conducted with 3-chloropyridine (0.114 g, 1.00 mmol), *o*-anisidine (0.148 g, 1.20 mmol),  $\text{Pd}(\text{OAc})_2$  and  $\text{CyPF-}t\text{-Bu}$  (5.0  $\mu\text{L}$  from stock solution A,  $5.0 \times 10^{-4}$  mmol) gave 197.1 mg (99%) of *N*-3-pyridyl-*o*-anisidine as colorless needles.  $^1\text{H}$  NMR ( $\text{CDCl}_3$ )  $\delta$  8.44 (d,  $J = 2.5$  Hz, 1 H), 8.17 (dd,  $J = 4.5, 1.5$  Hz, 1 H), 7.48

(ddd,  $J = 8.0, 2.5, 1.5$  Hz, 1 H), 7.16-7.26 (m, 1 H), 7.17 (dd,  $J = 8.0, 4.5$  Hz, 1 H), 6.88-6.93 (m, 3 H), 6.16 (s, b, 1 H), 3.89 (s, 3 H);  $^{13}\text{C}$  NMR ( $\text{CDCl}_3$ )  $\delta$  148.67, 142.03, 140.85, 139.31, 131.63, 123.97, 123.58, 121.06, 120.77, 115.03, 110.67, 55.53; Anal. Calcd. For  $\text{C}_{12}\text{H}_{12}\text{N}_2\text{O}$ : C, 71.98; H, 6.04; N, 13.99. Found: C, 72.05; H, 6.09; N, 13.89.

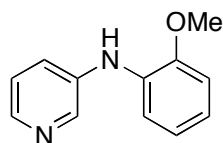

**2,3'-Dipyridylamine.**<sup>13</sup> (Table 6, entry 6). The general procedure A conducted with 3-chloropyridine (0.114 g, 1.00 mmol), 2-aminopyridine (0.113 g, 1.20 mmol),  $\text{Pd}(\text{OAc})_2$  (1.1 mg,  $5.0 \times 10^{-3}$  mmol) and  $\text{CyPF-}t\text{-Bu}$  (2.8 mg,  $5.0 \times 10^{-3}$  mmol) gave 165.0 mg (97%) of 2,3'-dipyridylamine as a colorless solid.  $^1\text{H}$  NMR ( $\text{CDCl}_3$ )  $\delta$  8.69 (d,  $J = 2.5$  Hz, 1 H), 8.25 (dd,  $J = 4.5, 1.5$  Hz, 1 H), 8.23 (dd,  $J = 5.0, 1.0$  Hz, 1 H), 8.00 (ddd,  $J = 8.0, 2.5, 1.5$  Hz, 1 H), 7.50-7.54 (m, 1 H), 7.32 (s, b, 1 H), 7.23-7.27 (m, 1 H), 6.81 (d,  $J = 8.0$  Hz, 1 H), 6.77-6.80 (m, 1 H);  $^{13}\text{C}$  NMR ( $\text{CDCl}_3$ )  $\delta$  155.33, 148.12, 143.09, 141.48, 137.83, 137.56, 126.18, 123.66, 115.70, 109.30.

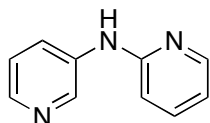

***N*-3-pyridyl-*p*-anisidine.** (Table 6, entry 7). The general procedure A conducted with 3-bromopyridine (0.158 g, 1.00 mmol), *p*-anisidine (0.148 g, 1.20 mmol),  $\text{Pd}(\text{OAc})_2$  and  $\text{CyPF-}t\text{-Bu}$  (50.0  $\mu\text{L}$  from stock solution A,  $5.0 \times 10^{-4}$  mmol) gave 161.0 mg (80%) of *N*-3-pyridyl-*p*-anisidine as a white solid.  $^1\text{H}$  NMR ( $\text{CDCl}_3$ )  $\delta$  8.22 (d,  $J = 2.8$  Hz, 1 H), 8.03 (dd,  $J = 4.4, 1.0$  Hz, 1 H), 7.18 (ddd,  $J = 8.0, 2.4, 1.4$  Hz, 1 H), 7.05-7.09 (m, 1 H), 7.05 (d,  $J = 8.8$  Hz, 2 H), 6.85 (d,  $J = 8.8$  Hz, 2 H), 5.84 (s, br, 1 H), 3.77 (s, 3 H);  $^{13}\text{C}$  NMR ( $\text{CDCl}_3$ )  $\delta$  155.73, 141.70, 140.33, 138.17, 134.32, 123.64, 122.55, 121.02, 114.74, 55.49. Anal. Calcd. For  $\text{C}_{12}\text{H}_{12}\text{N}_2\text{O}$ : C, 71.98; H, 6.04; N, 13.99. Found: C, 71.93; H, 6.08; N, 14.03.

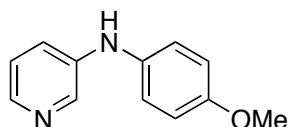

***N*-3-pyridyl-*p*-anisidine.** (Table 6, entry 8). The general procedure A conducted with 3-iodopyridine (0.205 g, 1.00 mmol), *p*-anisidine (0.148 g, 1.20 mmol),  $\text{Pd}(\text{OAc})_2$  and  $\text{CyPF-}t\text{-Bu}$  (50.0  $\mu\text{L}$  from stock solution A,  $5.0 \times 10^{-4}$  mmol) gave 195.2 mg (97%) of *N*-3-pyridyl-*p*-anisidine as a white solid. ( $^1\text{H}$  and  $^{13}\text{C}$  NMR spectra are the same as those for the product in Table 6, entry 7.)

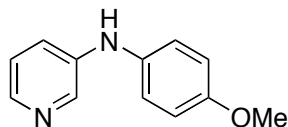

***N*-3-pyridyl-2-pyrimidinamine.**<sup>14</sup> (Table 6, entry 9). The general procedure A conducted with 3-bromopyridine (0.158 g, 1.00 mmol), 2-aminopyrimidine (0.113 g, 1.20 mmol),  $\text{Pd}(\text{OAc})_2$  (2.2 mg,  $1.0 \times 10^{-2}$  mmol) and  $\text{CyPF-}t\text{-Bu}$  (5.5 mg,  $1.0 \times 10^{-2}$  mmol) gave 165.1 mg (96%) of *N*-3-pyridyl-2-pyrimidinamine as a white solid.  $^1\text{H}$  NMR ( $\text{CDCl}_3$ )  $\delta$  8.70 (d,  $J = 2.0$  Hz, 1 H), 8.42 (d,  $J = 4.5$  Hz, 2

H), 8.26 (d,  $J = 4.5$  Hz, 1 H), 8.24 (ddd,  $J = 8.5, 2.5, 1.5$  Hz, 2 H), 7.24 (dd,  $J = 8.0, 5.0$  Hz, 1 H), 6.74 (t,  $J = 5.0$  Hz, 1 H);  $^{13}\text{C}$  NMR ( $\text{CDCl}_3$ )  $\delta$  160.01, 158.01, 143.48, 141.18, 136.40, 126.26, 123.41, 113.12.

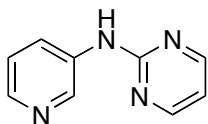

***N*-3-pyridyl-2-pyrazinamine. (Table 6, entry 10).** The general procedure A conducted with 3-bromopyridine (0.158 g, 1.00 mmol), 2-aminopyrazine (0.113 g, 1.20 mmol),  $\text{Pd}(\text{OAc})_2$  (2.2 mg,  $1.0 \times 10^{-2}$  mmol) and  $\text{CyPF-}t\text{-Bu}$  (5.5 mg,  $1.0 \times 10^{-2}$  mmol) gave 158.1 mg (92%) of *N*-3-pyridyl-2-pyrazinamine as a white solid.  $^1\text{H}$  NMR ( $\text{CD}_3\text{OD}$ )  $\delta$  8.75 (d,  $J = 2.5$  Hz, 1 H), 8.42 (ddd,  $J = 8.0, 2.5, 1.0$  Hz, 1 H), 8.07-8.08 (m, 2 H), 8.04 (dd,  $J = 4.5, 1.0$  Hz, 1 H), 7.84 (d,  $J = 4.5$  Hz, 1 H), 7.27 (dd,  $J = 8.5, 4.5$  Hz, 1 H);  $^{13}\text{C}$  NMR ( $\text{CD}_3\text{OD}$ )  $\delta$  153.92, 142.80, 142.69, 140.70, 139.47, 135.77, 135.08, 127.24, 125.15.

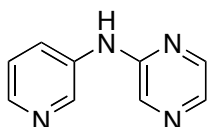

***N*-pyrimidyl-*p*-toluidine. (Table 6, entry 11).** The general procedure A conducted with 5-bromopyrimidine (0.158 g, 1.00 mmol), *p*-toluidine (0.128 g, 1.20 mmol), potassium phosphate (0.254 g, 1.40 mmol),  $\text{Pd}(\text{OAc})_2$  (2.2 mg, 1.0 mmol) and  $\text{CyPF-}t\text{-Bu}$  (5.5 mg, 1.0 mmol) gave 96.5 mg (52%) of *N*-pyrimidyl-*p*-toluidine as a colorless powder.  $^1\text{H}$  NMR ( $\text{CDCl}_3$ )  $\delta$  8.72 (s, 1 H), 8.45 (s, 2 H), 7.15 (d,  $J = 8.5$  Hz, 2 H), 7.03 (d,  $J = 8.5$  Hz, 2 H), 5.68 (s, b, 1 H), 2.33 (s, 3 H);  $^{13}\text{C}$  NMR ( $\text{CDCl}_3$ )  $\delta$  150.45, 143.99, 138.99, 133.39, 130.33, 120.04, 105.29, 20.76; Anal. Calcd. For  $\text{C}_{11}\text{H}_{11}\text{N}_3$ : C, 71.33; H, 5.99; N, 22.69. Found: C, 71.11; H, 5.96; N, 22.23.

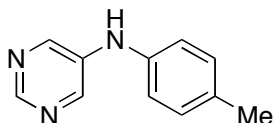

***N*-(4-isoquinoliny)-*p*-toluidine. (Table 6, entry 12).** The general procedure A conducted with 4-bromoisoquinoline (0.104 g, 0.500 mmol), *p*-toluidine (65.0 mg, 0.600 mmol),  $\text{Pd}(\text{OAc})_2$  and  $\text{CyPF-}t\text{-Bu}$  (25.0  $\mu\text{L}$  from stock solution **A**,  $2.5 \times 10^{-4}$  mmol) gave 98.9 mg (84%) of *N*-(4-isoquinoliny)-*p*-toluidine as a white solid.  $^1\text{H}$  NMR ( $\text{CDCl}_3$ )  $\delta$  8.91 (s, 1 H), 8.41 (s, 1 H), 7.94 (d,  $J = 8.4$  Hz, 2 H), 7.56-7.65 (m, 2 H), 7.07 (d,  $J = 8.4$  Hz, 2 H), 6.93 (d,  $J = 8.4$  Hz, 2 H), 6.04 (s, 1 H), 2.30 (s, 3 H);  $^{13}\text{C}$  NMR ( $\text{CDCl}_3$ )  $\delta$  146.14, 141.02, 134.39, 132.42, 130.99, 129.91, 129.63, 129.57, 128.97, 127.88, 127.24, 120.96, 118.42, 20.64. Anal. Calcd. For  $\text{C}_{16}\text{H}_{14}\text{N}_2$ : C, 82.02; H, 6.02; N, 11.96. Found: C, 81.69; H, 6.13; N, 11.88.

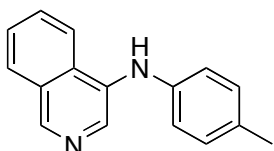

***N*-Phenyl-*p*-toluidine<sup>15</sup>. (Table 6, entry 13).** The general procedure A conducted with phenyl chloride (0.113 g, 1.00 mmol), *p*-toluidine (0.129 g, 1.20 mmol), Pd(OAc)<sub>2</sub> and CyPF-*t*-Bu (50.0 μL from stock solution A, 5.0 × 10<sup>-4</sup> mmol) gave 182.3 mg (99%) of *N*-phenyl-*p*-toluidine as a white solid. <sup>1</sup>H NMR (CDCl<sub>3</sub>) δ 7.28 (t, *J* = 8.4 Hz, 2 H), 7.13(d, *J* = 8.0 Hz, 2 H), 7.03-7.06 (m, 4 H), 6.92 (t, *J* = 7.2 Hz, 1 H), 5.62 (s, br, 1 H), 2.35 (s, 3 H); <sup>13</sup>C NMR (CDCl<sub>3</sub>) δ 143.84, 140.18, 130.83, 129.79, 129.24, 120.21, 118.82, 116.76, 20.65.

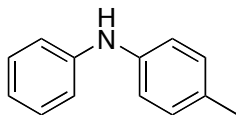

***N*-Phenyl-*p*-toluidine<sup>15</sup>. (Table 6, entry 14).** The general procedure A conducted with phenyl bromide (0.157 g, 1.00 mmol), *p*-toluidine (0.129 g, 1.20 mmol), Pd(OAc)<sub>2</sub> and CyPF-*t*-Bu (5.0 μL from stock solution A, 5.0 × 10<sup>-5</sup> mmol) gave 174.9 mg (95%) of *N*-phenyl-*p*-toluidine as a white solid. (<sup>1</sup>H and <sup>13</sup>C NMR spectra are the same as those for the product in Table 6, entry 13.)

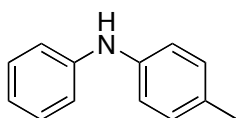

***N*-(2-Pyridyl)-aniline<sup>16</sup>. (Table 6, entry 15).** The general procedure A conducted with phenyl bromide (0.157 g, 1.00 mmol), 2-aminopyridine (0.113 g, 1.20 mmol), Pd(OAc)<sub>2</sub> (2.2 mg, 1.0 × 10<sup>-2</sup> mmol) and CyPF-*t*-Bu (5.5 mg, 1.0 × 10<sup>-2</sup> mmol) gave 138.0 mg (81%) of *N*-(2-pyridyl)-aniline as a white solid. <sup>1</sup>H NMR (CDCl<sub>3</sub>) δ 8.19 (d, *J* = 8.0 Hz, 1 H), 7.44-7.50 (m, 1 H), 7.33-7.34 (m, 2 H), 7.30-7.32 (m, 2 H), 7.02-7.07 (m, 2 H), 6.88 (d, *J* = 8.0 Hz, 1 H), 6.71 (t, *J* = 7.0 Hz, 1 H); <sup>13</sup>C NMR (CDCl<sub>3</sub>) δ 155.99, 148.32, 140.42, 137.70, 129.26, 122.78, 120.34, 114.95, 108.14.

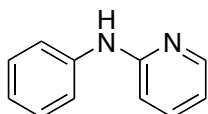

***N*-Phenylaminobenzothiazole. (Table 6, entry 16).** The general procedure A conducted with phenyl bromide (0.157 g, 1.00 mmol), 2-aminobenzothiazole (0.180 g, 1.20 mmol), Pd(OAc)<sub>2</sub> (2.2 mg, 1.0 × 10<sup>-2</sup> mmol) and CyPF-*t*-Bu (5.5 mg, 1.0 × 10<sup>-2</sup> mmol) gave 139.6 mg (62%) of *N*-phenylaminobenzothiazole as a white solid. <sup>1</sup>H NMR (CDCl<sub>3</sub>) δ 7.58 (dd, *J* = 8.0, 1.5 Hz, 1 H), 7.49 (td, *J* = 8.0, 1.5 Hz, 1 H), 7.34 (dd, *J* = 8.0, 1.0 Hz, 1 H), 7.25 (t, *J* = 7.5 Hz, 2 H), 7.17 (t, *J* = 7.5 Hz, 1 H), 7.12 (td, *J* = 8.0, 1.0 Hz, 1 H), 7.03 (d, *J* = 7.5 Hz, 2 H), 6.95-7.05 (s, br, 1 H); <sup>13</sup>C NMR (CDCl<sub>3</sub>) δ 139.67, 137.51, 134.87, 131.73, 129.38, 126.85, 126.46, 124.09, 117.24, 115.17, 110.04. Anal. Calcd. For C<sub>13</sub>H<sub>10</sub>N<sub>2</sub>S: C, 69.00; H, 4.45; N, 12.38. Found: C, 69.02; H, 4.49; N, 12.38.

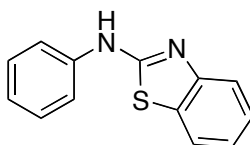

***N*-*p*-tolyl-*p*-anisidine.<sup>17</sup> (Table 6, entry 17).** The general procedure A conducted with *p*-tolyl chloride (0.127 g, 1.00 mmol), *p*-anisidine (0.148 g, 1.20 mmol), Pd(OAc)<sub>2</sub> and CyPF-*t*-Bu (50.0 μL from stock solution A, 5.0 × 10<sup>-4</sup> mmol) gave 210.6 mg (99%) of *N*-*p*-tolyl-*p*-anisidine as a white solid. <sup>1</sup>H NMR (CDCl<sub>3</sub>) δ 7.05 (d, *J* = 8.4 Hz, 2 H), 7.03 (d, *J* = 7.6 Hz, 2 H), 6.84-6.88 (m, 4 H), 5.40 (s, br, 1 H),

3.80 (s, 3 H), 2.27 (s, 3 H);  $^{13}\text{C}$  NMR ( $\text{CDCl}_3$ )  $\delta$  154.64, 142.27, 136.50, 129.72, 129.17, 120.95, 116.43, 114.55, 55.48, 20.49.

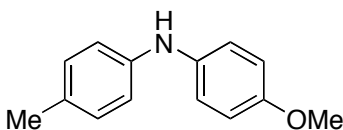

***N-p*-tolyl-*p*-anisidine.** (Table 6, entry 18). The general procedure A conducted with *p*-tolyl bromide (0.171 g, 1.00 mmol), *p*-anisidine (0.148 g, 1.20 mmol),  $\text{Pd}(\text{OAc})_2$  and  $\text{CyPF-}t\text{-Bu}$  (50.0  $\mu\text{L}$  from stock solution A,  $5.0 \times 10^{-4}$  mmol) gave 206.3 mg (97%) of *N-p*-tolyl-*p*-anisidine as a white solid. ( $^1\text{H}$  and  $^{13}\text{C}$  NMR spectra are the same as those for the product in Table 6, entry 18.)

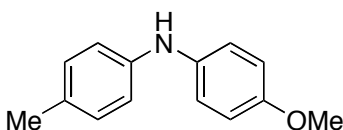

**3,4'-Dimethoxydiphenylamine.**<sup>18</sup> (Table 6, entry 19). The general procedure A conducted with 3-chloroanisole (0.143 g, 1.00 mmol), *p*-anisidine (0.148 g, 1.20 mmol),  $\text{Pd}(\text{OAc})_2$  and  $\text{CyPF-}t\text{-Bu}$  (50.0  $\mu\text{L}$  from stock solution A,  $5.0 \times 10^{-4}$  mmol) gave 227.9 mg (99%) of 3,4'-Dimethoxydiphenylamine as a white solid.  $^1\text{H}$  NMR ( $\text{CDCl}_3$ )  $\delta$  7.13 (t,  $J = 8.0$  Hz, 1 H), 7.09 (d,  $J = 8.4$  Hz, 2 H), 6.87 (d,  $J = 8.4$  Hz, 2 H), 6.48-6.51 (m, 2 H), 6.41 (d,  $J = 8.4$  Hz, 1 H), 5.54 (s, br, 1 H), 3.80 (s, 3 H), 3.76 (s, 3 H);  $^{13}\text{C}$  NMR ( $\text{CDCl}_3$ )  $\delta$  160.66, 155.30, 146.60, 135.33, 129.97, 122.57, 114.55, 108.21, 104.59, 101.19, 55.45, 55.03.

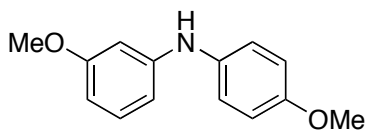

**3,4'-Dimethoxydiphenylamine.** (Table 6, entry 20). The general procedure A conducted with 3-bromoanisole (0.187 g, 1.00 mmol), *p*-anisidine (0.148 g, 1.20 mmol),  $\text{Pd}(\text{OAc})_2$  and  $\text{CyPF-}t\text{-Bu}$  (50.0  $\mu\text{L}$  from stock solution A,  $5.0 \times 10^{-4}$  mmol) gave 216.4 mg (94%) of 3,4'-Dimethoxydiphenylamine as a white solid. ( $^1\text{H}$  and  $^{13}\text{C}$  NMR spectra are the same as those for the product in Table 6, entry 19.)

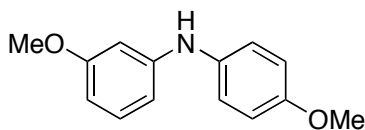

***N-(o-Tolyl)-p-toluidine***<sup>18</sup>. (Table 6, entry 21). The general procedure A conducted with *o*-tolyl bromide (0.171 g, 1.00 mmol), *p*-toluidine (0.129 g, 1.20 mmol),  $\text{Pd}(\text{OAc})_2$  and  $\text{CyPF-}t\text{-Bu}$  (50.0  $\mu\text{L}$  from stock solution A,  $5.0 \times 10^{-4}$  mmol) gave 189.8 mg (96%) of *N-(o-Tolyl)-p-toluidine* as a white solid.  $^1\text{H}$  NMR ( $\text{CDCl}_3$ )  $\delta$  7.05 (d,  $J = 8.0$  Hz, 2 H), 6.99 (t,  $J = 6.8$  Hz, 1 H), 6.95 (d,  $J = 8.0$  Hz, 2 H), 6.74-6.79 (m, 3 H), 5.14 (s, br, 1 H), 2.18 (s, 3 H), 2.11 (s, 3 H);  $^{13}\text{C}$  NMR ( $\text{CDCl}_3$ )  $\delta$  141.97, 140.99, 130.76, 130.29, 129.75, 126.98, 126.67, 121.03, 118.54, 117.25, 20.59, 17.77.

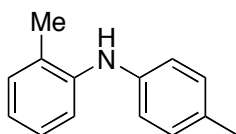

***N*-(*o*-Tolyl)-*p*-toluidine**<sup>18</sup>. (Table 6, entry 22). The general procedure A conducted with *o*-tolyl iodide (0.219 g, 1.00 mmol), *p*-toluidine (0.129 g, 1.20 mmol), Pd(OAc)<sub>2</sub> and CyPF-*t*-Bu (50.0 μL from stock solution A, 5.0 × 10<sup>-4</sup> mmol) gave 195.7 mg (99%) of *N*-(*o*-Tolyl)-*p*-toluidine as a white solid. (<sup>1</sup>H and <sup>13</sup>C NMR spectra are the same as those for the product in Table 6, entry 21.)

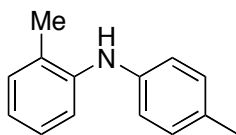

**2-*N*-(*p*-Tolyl)-1,3-xylylidine**. (Table 6, entry 23). The general procedure A conducted with 2-bromo-1,2-dimethylbenzene (0.185 g, 1.00 mmol), *p*-toluidine (0.129 g, 1.20 mmol), Pd(OAc)<sub>2</sub> (1.1 mg, 5.0 × 10<sup>-3</sup> mmol) and CyPF-*t*-Bu (2.8 mg, 5.0 × 10<sup>-3</sup> mmol) gave 188.4 mg (89%) of 2-*N*-(*p*-Tolyl)-1,3-xylylidine as a white solid. <sup>1</sup>H NMR (CDCl<sub>3</sub>) δ 6.92-7.00 (m, 3 H), 6.85 (d, *J* = 8.4 Hz, 2 H), 6.31 (d, *J* = 8.0 Hz, 2 H), 4.95 (s, br, 1 H), 2.12 (s, 3 H), 2.09 (s, 6 H); <sup>13</sup>C NMR (CDCl<sub>3</sub>) δ 143.85, 138.65, 135.50, 129.71, 128.51, 127.38, 125.39, 113.73, 20.43, 18.34. Anal. Calcd. For C<sub>15</sub>H<sub>17</sub>N: C, 85.26; H, 8.11; N, 6.63. Found: C, 85.53; H, 8.03; N, 6.76.

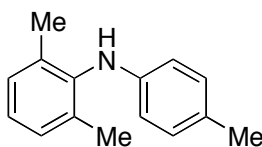

***N*-(*p*-Tolyl)-2-cyclohexylaniline**. (Table 6, entry 24). The general procedure A conducted with 1-bromo-2-cyclohexylbenzene (0.239 g, 1.00 mmol), *p*-toluidine (0.129 g, 1.20 mmol), Pd(OAc)<sub>2</sub> and CyPF-*t*-Bu (50.0 μL from stock solution A, 5.0 × 10<sup>-4</sup> mmol) gave 235.2 mg (89%) of *N*-(*p*-Tolyl)-2-cyclohexylaniline as a white solid. <sup>1</sup>H NMR (CDCl<sub>3</sub>) δ 7.30 (dd, *J* = 8.0, 1.2 Hz, 1 H), 7.24 (d, *J* = 8.4, 1.2 Hz, 1 H), 7.14 (td, *J* = 7.2, 1.2 Hz, 1 H), 7.10 (d, *J* = 8.0 Hz, 2 H), 7.03 (td, *J* = 7.2, 1.2 Hz, 1 H), 6.90 (d, *J* = 8.4 Hz, 2 H), 5.42 (s, br, 1 H), 2.13-2.78 (m, 1 H), 2.34 (s, 3 H), 1.88-1.92 (m, 4 H), 1.79-1.82 (m, 1 H), 1.13-1.54 (m, 5 H); <sup>13</sup>C NMR (CDCl<sub>3</sub>) δ 140.23, 140.53, 138.08, 129.77, 129.69, 126.46, 126.26, 122.27, 119.98, 117.76, 38.25, 33.39, 27.05, 26.27, 20.57.

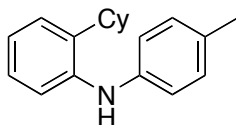

**2-(*N*-Methylanilino)pyridine**.<sup>11</sup> (Table 7, entry 1). The general procedure A conducted with 2-chloropyridine (0.125 mg, 1.10 mmol), *N*-methylaniline (0.106 mg, 1.00 mmol), Pd(OAc)<sub>2</sub> (2.2 mg, 1.0 × 10<sup>-2</sup> mmol) and CyPF-*t*-Bu (5.5 mg, 1.0 × 10<sup>-2</sup> mmol) gave 105 mg (57%) of 2-(*N*-Methylanilino)pyridine as a colorless oil. <sup>1</sup>H NMR (CDCl<sub>3</sub>) δ 8.21 (ddd, *J* = 5.2, 1.6, 0.8 Hz, 1 H), 7.38 (tt, *J* = 8.0, 2.0 Hz, 2 H), 7.29 (ddd, *J* = 8.4, 6.8, 2.0 Hz, 1 H), 7.25 (dd, *J* = 8.4, 2.0 Hz, 2 H), 7.19 (tt, *J* = 7.2, 1.2 Hz, 1 H), 6.59 (ddd, *J* = 7.6, 5.2, 0.8 Hz, 1 H), 6.51 (dt, *J* = 8.4, 0.8 Hz, 1 H), 3.46 (s, 3 H); <sup>13</sup>C NMR (CDCl<sub>3</sub>) δ 158.74, 147.70, 146.75, 136.52, 129.64, 126.27, 125.38, 113.05, 109.11, 38.36.



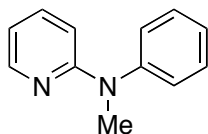

***N*-(3-Pyridyl)morpholine.**<sup>1</sup> (Table 7, entry 2). The general procedure A conducted with 3-chloropyridine (0.114 mg, 1.00 mmol), morpholine (0.105 mg, 1.20 mmol), Pd(OAc)<sub>2</sub> (2.2 mg, 1.0 × 10<sup>-2</sup> mmol) and CyPF-*t*-Bu (5.5 mg, 1.0 × 10<sup>-2</sup> mmol) gave 113 mg (69%) of *N*-(3-Pyridyl)morpholine as a colorless oil. <sup>1</sup>H NMR (CDCl<sub>3</sub>) δ 8.31 (s, 1 H), 8.13 (t, *J* = 2.8 Hz, 1 H), 7.19 (d, *J* = 2.4 Hz, 1 H), 7.18 (d, *J* = 1.6 Hz, 1 H), 3.88 (t, *J* = 4.8 Hz, 4 H), 3.19 (t, *J* = 4.8 Hz, 4 H); <sup>13</sup>C NMR (CDCl<sub>3</sub>) δ 147.0, 141.2, 138.4, 123.7, 122.3, 66.8, 48.7.

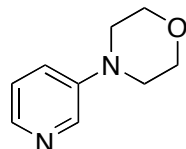

***N,N*-Di-(4'-methoxyphenyl)-4-pyridinamine.** (Table 7, entry 3). The general procedure A conducted with 4-chloropyridine hydrochloride 4,4'-dimethoxyphenylamine (0.150 g, 1.00 mmol), (0.275 g, 1.20 mmol), Pd(OAc)<sub>2</sub> (2.2 mg, 1.0 × 10<sup>-2</sup> mmol) and CyPF-*t*-Bu (5.5 mg, 1.0 × 10<sup>-2</sup> mmol) gave 152.0 mg (50%) of *N,N*-Di-(4'-methoxyphenyl)-4-pyridinamine as a white solid. <sup>1</sup>H NMR (CDCl<sub>3</sub>) δ 8.16 (s, b, 2 H), 7.13 (d, *J* = 8.8 Hz, 4 H), 7.89 (d, *J* = 8.8 Hz, 4 H), 6.59 (s, b, 2 H), 3.80 (s, 6 H); <sup>13</sup>C NMR (CDCl<sub>3</sub>) δ 157.41, 154.23, 149.52, 137.70, 128.16, 114.96, 110.66, 55.38. Anal. Calcd. For C<sub>19</sub>H<sub>18</sub>N<sub>2</sub>O<sub>2</sub>: C, 74.49; H, 5.92; N, 9.14. Found: C, 74.44; H, 6.02; N, 8.99.

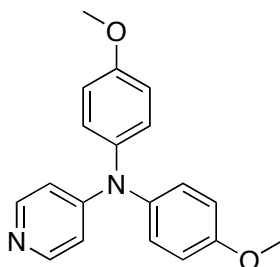

***N*-methyl-*N*-phenyl-1-isoquinolinamine** (Table 7, entry 4). The general procedure A conducted with 1-chloroisoquinoline (0.164 g, 1.00 mmol), *N*-methylaniline (0.214 mg, 2.00 mmol), Pd(OAc)<sub>2</sub> (2.2 mg, 1.0 × 10<sup>-2</sup> mmol) and CyPF-*t*-Bu (5.5 mg, 1.0 × 10<sup>-2</sup> mmol) gave 150.3 mg (64%) of *N*-methyl-*N*-phenyl-1-isoquinolinamine as a yellow solid. <sup>1</sup>H NMR (CDCl<sub>3</sub>) δ 8.20 (d, *J* = 6.0 Hz, 1 H), 7.63 (d, *J* = 7.6 Hz, 1 H), 7.60 (d, *J* = 8.4 Hz, 1 H), 7.42 (td, *J* = 8.2, 0.8 Hz, 1 H), 7.24 (d, *J* = 5.6 Hz, 1 H), 7.15 (td, *J* = 8.0, 1.2 Hz, 1 H), 7.12 (t, *J* = 8.0 Hz, 2 H), 6.87 (tt, *J* = 7.6, 1.2 Hz, 1 H), 6.82 (d, *J* = 8.4 Hz, 2 H), 3.50 (s, 3 H); <sup>13</sup>C NMR (CDCl<sub>3</sub>) δ 158.38, 150.68, 141.11, 138.19, 129.48, 129.18, 126.87, 126.68, 126.09, 122.77, 122.13, 121.15, 116.69, 41.34. Anal. Calcd. For C<sub>16</sub>H<sub>14</sub>N<sub>2</sub>: C, 82.02; H, 6.02; N, 11.96. Found: C, 82.01; H, 6.10; N, 11.85.

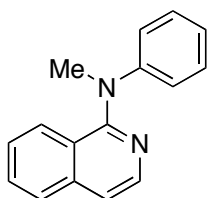

***N*-Methyldiphenylamine.**<sup>19</sup> (Table 7, entry 5). The general procedure A conducted with phenyl bromide (0.157 g, 1.00 mmol), *N*-methylaniline (0.129 g, 1.20 mmol), Pd(OAc)<sub>2</sub> and CyPF-*t*-Bu (50.0  $\mu$ L from stock solution A,  $5.0 \times 10^{-4}$  mmol) gave 102.3 mg (56%) of *N*-Methyldiphenylamine as a pale yellow liquid. <sup>1</sup>H NMR (CDCl<sub>3</sub>)  $\delta$  7.31 (t,  $J = 8.5$  Hz, 4 H), 7.06 (dd,  $J = 8.5, 1.0$  Hz, 4 H), 6.99 (tt,  $J = 8.5, 1.0$  Hz, 2 H), 3.35 (s, 3 H); <sup>13</sup>C NMR (CDCl<sub>3</sub>)  $\delta$  148.97, 129.16, 121.21, 120.39, 40.18.

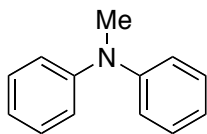

***N, N*-Di-butylaniline.**<sup>20</sup> (Table 7, entry 6). The general procedure A conducted with phenyl bromide (0.157 g, 1.00 mmol), dibutylamine (0.155 g, 1.20 mmol), Pd(OAc)<sub>2</sub> and CyPF-*t*-Bu Pd(OAc)<sub>2</sub> (1.1 mg,  $5.0 \times 10^{-3}$  mmol) and CyPF-*t*-Bu (2.8 mg,  $5.0 \times 10^{-3}$  mmol) gave 140.5 mg (69%) of *N, N*-Di-butylaniline as a white solid. <sup>1</sup>H NMR (CDCl<sub>3</sub>)  $\delta$  7.19 (t,  $J = 9.0$  Hz, 2 H), 6.64 (d,  $J = 9.5$  Hz, 2 H), 6.62 (t,  $J = 9.0$  Hz, 1 H), 3.26 (t,  $J = 8.0$  Hz, 4 H), 1.53-1.60 (m, 4 H), 1.35 (sext,  $J = 7.5$  Hz, 4 H), 0.95 (t,  $J = 7.5$  Hz, 6 H); <sup>13</sup>C NMR (CDCl<sub>3</sub>)  $\delta$  148.25, 129.17, 115.11, 111.76, 50.79, 29.45, 20.39, 14.02.

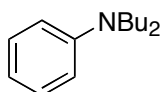

**Triphenylamine.**<sup>19</sup> (Table 7, entry 7). The general procedure A conducted with phenyl bromide (0.157 g, 1.00 mmol), diphenylamine (0.203 g, 1.20 mmol), Pd(OAc)<sub>2</sub> and CyPF-*t*-Bu Pd(OAc)<sub>2</sub> (1.1 mg,  $5.0 \times 10^{-3}$  mmol) and CyPF-*t*-Bu (2.8 mg,  $5.0 \times 10^{-3}$  mmol) gave 211.3 mg (86%) of triphenylamine as a white solid. <sup>1</sup>H NMR (CDCl<sub>3</sub>)  $\delta$  7.27 (tt,  $J = 7.5, 2.0$  Hz, 6 H), 7.12 (dd,  $J = 8.5, 1.0$  Hz, 6 H), 7.03 (tt,  $J = 7.5, 1.5$  Hz, 3 H), 3.35 (s, 3 H); <sup>13</sup>C NMR (CDCl<sub>3</sub>)  $\delta$  147.82, 129.18, 124.13, 122.63.

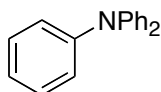

***p*-Tolylmorpholine.**<sup>11</sup> (Table 7, entry 8). The general procedure A conducted with *p*-tolyl bromide (0.171 g, 1.00 mmol), morpholine (0.105 g, 1.20 mmol), Pd(OAc)<sub>2</sub> (1.1 mg,  $5.0 \times 10^{-3}$  mmol) and CyPF-*t*-Bu (2.8 mg,  $5.0 \times 10^{-3}$  mmol) gave 152.5 mg (86%) of *p*-tolylmorpholine as a pale yellow liquid. <sup>1</sup>H NMR (CDCl<sub>3</sub>)  $\delta$  7.09 (d,  $J = 8.0$  Hz, 2 H), 6.83 (d,  $J = 8.5$  Hz, 2 H), 3.85 (t,  $J = 5.0$  Hz, 4 H), 3.10 (t,  $J = 5.0$  Hz, 4 H), 2.27 (s, 3 H); <sup>13</sup>C NMR (CDCl<sub>3</sub>)  $\delta$  149.16, 129.68, 129.53, 115.99, 66.92, 49.84, 20.36.

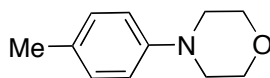

***N*-(3-Methoxyphenyl)morpholine.**<sup>11</sup> (Table 7, entry 9). The general procedure A conducted with 3-bromoanisole (0.187 g, 1.00 mmol), morpholine (0.105 g, 1.20 mmol), Pd(OAc)<sub>2</sub> and CyPF-*t*-Bu (50.0  $\mu$ L from stock solution A,  $5.0 \times 10^{-4}$  mmol) gave 158.9 mg (82%) of *N*-(3-methoxyphenyl)morpholine as a pale yellow liquid. <sup>1</sup>H NMR (CDCl<sub>3</sub>)  $\delta$  7.18 (t,  $J = 8.5$  Hz, 1 H), 6.53 (ddd,  $J = 8.0, 2.0, 1.0$  Hz, 1 H), 6.42-6.45 (m, 2 H), 3.84 (t,  $J = 5.0$  Hz, 4 H), 3.78 (s, 3 H), 3.14 (t,  $J = 5.0$  Hz, 4 H); <sup>13</sup>C NMR (CDCl<sub>3</sub>)  $\delta$  160.00, 152.67, 129.83, 108.43, 104.68, 102.18, 66.86, 55.15, 49.25.

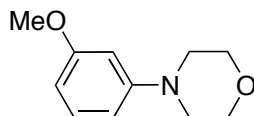

**General Procedure C Using  $\text{LiN}(\text{SiMe}_3)_2$  as the Base for Catalytic Amination of Functionalized Aryl Chlorides.** The reaction conditions and average yields for each reaction are shown in Table 8-10. A typical procedure is given for the first entry in Table 8.

**2-Acetamido-5-*N*-benzylaminopyridine (Table 8, entry 1)** 2-Acetamido-5-chloropyridine (0.168 g, 1.00 mmol) was added to a 4 mL vial containing lithium bis(trimethylsilyl)amide (0.402 g, 2.40 mmol) in 1.0 mL of DME.  $\text{Pd}(\text{OAc})_2$  (1.1 mg,  $5.0 \times 10^{-3}$  mmol), CyPF-*t*-Bu (2.8 mg,  $5.0 \times 10^{-3}$  mmol) were then added by syringe, followed by octylamine (0.155g, 1.20 mmol). The vial was sealed with a cap containing a PTFE septum, and the reaction mixture was stirred at 100° C for 24 h. The reaction mixture then was allowed to cool to room temperature. To the reaction mixture was added 1 M HCl (0.5-1.0 mL). The mixture was stirred at room temperature for 5 min and was then extracted with  $\text{CH}_2\text{Cl}_2$  ( $3 \times 30.0$  mL). The organic layer was separated and dried over  $\text{Na}_2\text{SO}_4$ . The solvent was evaporated, and the crude product was isolated by eluting with ethyl acetate to give 142.4 mg (59%) of 2-Acetamido-5-*N*-benzylaminopyridine as a white solid.  $^1\text{H}$  NMR ( $\text{CDCl}_3$ )  $\delta$  9.12 (s, 1 H), 7.94 (d,  $J = 9.0$  Hz, 1 H), 7.60 (d,  $J = 2.5$  Hz, 1 H), 7.27 (d,  $J = 4.5$  Hz, 4 H), 7.20-7.22 (m, 1 H), 6.93 (dd,  $J = 9.0, 3.0$  Hz, 1 H), 4.25 (s, 2 H), 4.10 (s, br, 1 H), 1.98 (s, 3 H);  $^{13}\text{C}$  NMR ( $\text{CDCl}_3$ )  $\delta$  168.27, 143.19, 141.09, 138.47, 131.36, 128.65, 127.37, 127.23, 122.50, 115.16, 48.18, 24.22. Anal. Calcd. For  $\text{C}_{14}\text{H}_{15}\text{N}_3\text{O}$ : C, 69.69; H, 6.27; N, 17.41. Found: C, 69.59; H, 6.33; N, 17.20.

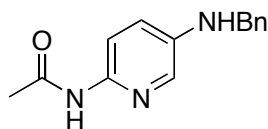

**2-Acetamido-5-*N*-*sec*-butylaminopyridine (Table 8, entry 2)** The general procedure C conducted with 2-acetamido-5-chloropyridine (0.168 g, 1.00 mmol), *sec*-butylamine (0.119 g, 1.20 mmol),  $\text{Pd}(\text{OAc})_2$  (1.1 mg,  $5.0 \times 10^{-3}$  mmol), CyPF-*t*-Bu (2.8 mg,  $5.0 \times 10^{-3}$  mmol) and lithium bis(trimethylsilyl)amide (0.402 g, 2.40 mmol) gave 198.3 mg (96%) of 2-Acetamido-5-*N*-*sec*-butylaminopyridine as a white solid.  $^1\text{H}$  NMR ( $\text{CDCl}_3$ )  $\delta$  9.35(s, 1 H), 7.95 (d,  $J = 9.0$  Hz, 1 H), 7.60 (d,  $J = 2.5$  Hz, 1 H), 6.91 (dd,  $J = 9.0, 2.5$  Hz, 1 H), 3.40 (s, br, 1 H), 3.30 (sext,  $J = 6.5$  Hz, 1 H), 2.09 (s, 3 H), 1.50-1.56 (m, 1 H), 1.39-1.44 (m, 1 H), 1.11 (d,  $J = 6.5$  Hz, 3 H), 0.89 (t,  $J = 7.0$  Hz, 3 H);  $^{13}\text{C}$  NMR ( $\text{CDCl}_3$ )  $\delta$  168.22, 142.62, 140.83, 132.14, 122.53, 115.36, 50.05, 29.32, 24.19, 19.91, 10.15.

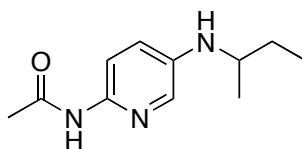

**5-Acetamido-2-*N*-benzylaminopyridine (Table 8, entry 3)** The general procedure C conducted with 5-acetamido-2-chloropyridine (0.168 g, 1.00 mmol), benzylamine (0.129 g, 1.20 mmol),  $\text{Pd}(\text{OAc})_2$  (1.1 mg,  $5.0 \times 10^{-3}$  mmol), CyPF-*t*-Bu (2.8 mg,  $5.0 \times 10^{-3}$  mmol) and lithium bis(trimethylsilyl)amide (0.402 g, 2.40 mmol) gave 175.5 mg (73%) of 2-Acetamido-5-*N*-benzylaminopyridine as a white solid.  $^1\text{H}$  NMR ( $\text{CD}_3\text{OD}$ )  $\delta$  8.05 (dd,  $J = 2.5, 1.0$  Hz, 1 H), 7.59 (dd,  $J = 9.0, 3.0$  Hz, 1 H), 7.32 (d,  $J = 7.5$  Hz, 2 H), 7.28 (td,  $J = 7.0, 1.5$  Hz, 2 H), 7.20 (t,  $J = 7.5$  Hz, 1 H), 6.50 (dd,  $J = 9.0, 1.0$  Hz, 1 H), 4.46

(s, 2 H), 2.07 (s, 3 H);  $^{13}\text{C}$  NMR ( $\text{CD}_3\text{OD}$ )  $\delta$  171.70, 157.55, 141.10, 140.92, 133.18, 129.42, 128.32, 127.90, 126.57, 109.24, 46.54, 23.26.

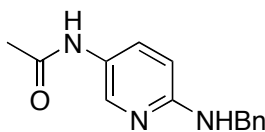

**5-Acetamido-2-*N*-iso-butylaminopyridine (Table 8, entry 4)** The general procedure C conducted with 5-acetamido-2-chloropyridine (0.168 g, 1.00 mmol), *iso*-butylamine (0.119 g, 1.20 mmol),  $\text{Pd}(\text{OAc})_2$  (1.1 mg,  $5.0 \times 10^{-3}$  mmol), CyPF-*t*-Bu (2.8 mg,  $5.0 \times 10^{-3}$  mmol) and lithium bis(trimethylsilyl)amide (0.402 g, 2.40 mmol) gave 121.1 mg (67%) of 5-Acetamido-2-*N*-iso-butylaminopyridine as a white solid.  $^1\text{H}$  NMR ( $\text{CD}_3\text{OD}$ )  $\delta$  7.60 (d,  $J = 9.0$  Hz, 1 H), 7.58 (s, 1 H), 6.91 (dd,  $J = 9.0, 3.0$  Hz, 1 H), 2.78 (d,  $J = 8.5$  Hz, 2 H), 2.02 (s, 3 H), 1.72-1.79 (m, 1 H), 0.87 (d,  $J = 6.5$  Hz, 6 H);  $^{13}\text{C}$  NMR ( $\text{CD}_3\text{OD}$ )  $\delta$  171.24, 144.42, 142.28, 132.98, 122.08, 117.44, 52.49, 29.02, 23.58, 20.76.

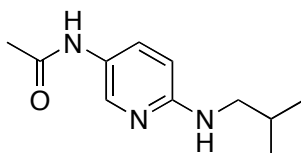

**2-Hydroxy-5-*N*-octylaminopyridine (Table 8, entry 5)** The general procedure C conducted with 5-chloro-2-hydroxypyridine (0.130 g, 1.00 mmol), octylamine (0.155 g, 1.20 mmol),  $\text{Pd}(\text{OAc})_2$  (1.1 mg,  $5.0 \times 10^{-3}$  mmol), CyPF-*t*-Bu (2.8 mg,  $5.0 \times 10^{-3}$  mmol) and lithium bis(trimethylsilyl)amide (0.402 g, 2.40 mmol) gave 117.6 mg (53%) of 2-Hydroxy-5-*N*-octylaminopyridine as a white solid.  $^1\text{H}$  NMR ( $\text{CDCl}_3$ )  $\delta$  13.63 (s. br, 1 H), 7.07 (dd,  $J = 9.5, 2.5$  Hz, 1 H), 6.62 (d,  $J = 2.5$  Hz, 1 H), 6.48 (d,  $J = 10.0$  Hz, 1 H), 3.20 (s, br, 1 H), 2.83 (t,  $J = 7.0$  Hz, 2 H), 1.53 (quint,  $J = 7.0$  Hz, 2 H), 1.23-1.32 (m, 10 H), 0.84 (d,  $J = 67.0$  Hz, 3 H);  $^{13}\text{C}$  NMR ( $\text{CDCl}_3$ )  $\delta$  162.35, 135.37, 131.93, 120.31, 114.20, 45.06, 31.72, 29.29, 29.19, 29.15, 27.07, 22.57, 14.02. Anal. Calcd. For  $\text{C}_{13}\text{H}_{22}\text{N}_2\text{O}$ : C, 70.23; H, 9.97; N, 12.60. Found: C, 69.96; H, 10.01; N, 12.42.

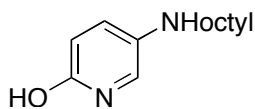

**3-Hydroxy-5-*N*-cyclohexylaminopyridine (Table 8, entry 6)** The general procedure C conducted with 5-chloro-3-hydroxypyridine (0.130 g, 1.00 mmol), cyclohexylamine (0.119 g, 1.20 mmol),  $\text{Pd}(\text{OAc})_2$  (1.1 mg,  $5.0 \times 10^{-3}$  mmol), CyPF-*t*-Bu (2.8 mg,  $5.0 \times 10^{-3}$  mmol) and lithium bis(trimethylsilyl)amide (0.402 g, 2.40 mmol) gave 110.6 mg (67%) of 3-Hydroxy-5-*N*-cyclohexylaminopyridine as a white solid.  $^1\text{H}$  NMR ( $\text{CD}_3\text{OD}$ )  $\delta$  7.40 (d,  $J = 2.5$  Hz, 1 H), 7.30 (d,  $J = 2.5$  Hz, 1 H), 6.43 (t,  $J = 2.5$  Hz, 1 H), 3.15 (tt,  $J = 10.0, 4.0$  Hz, 1 H), 1.98 (dd,  $J = 12.5, 3.0$  Hz, 2 H), 1.76 (dt,  $J = 13.5, 3.5$  Hz, 2 H), 1.65 (dt,  $J = 12.5, 3.5$  Hz, 1 H), 1.33-1.42 (m, 2 H), 1.14-1.27 (m, 3 H);  $^{13}\text{C}$  NMR ( $\text{CD}_3\text{OD}$ )  $\delta$  156.57, 147.27, 127.85, 125.42, 106.94, 52.42, 33.92, 27.00, 26.09.

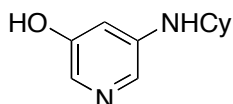

**5-Hydroxymethyl-2-*N*-octylaminopyridine (Table 8, entry 7)** The general procedure C conducted with 2-chloro-5-hydroxymethylpyridine (0.144 g, 1.00 mmol), octylamine (0.155 g, 1.20 mmol), Pd(OAc)<sub>2</sub> (1.1 mg, 5.0 × 10<sup>-3</sup> mmol), CyPF-*t*-Bu (2.8 mg, 5.0 × 10<sup>-3</sup> mmol) and lithium bis(trimethylsilyl)amide (0.402 g, 2.40 mmol) gave 187.0 mg (79%) of 5-Hydroxymethyl-2-*N*-octylaminopyridine as a white solid. <sup>1</sup>H NMR (CDCl<sub>3</sub>) δ 7.85 (d, *J* = 2.0 Hz, 1 H), 7.42 (dd, *J* = 8.5, 2.0 Hz, 1 H), 6.32 (d, *J* = 8.5 Hz, 1 H), 4.59 (s, 1 H), 4.44 (s, 2 H), 3.35 (s, br, 1 H), 3.15 (td, *J* = 7.0, 5.0 Hz, 2 H), 1.55 (quint, *J* = 7.5 Hz, 2 H), 1.23-1.35 (m, 10 H), 0.84 (t, *J* = 7.0 Hz, 3 H); <sup>13</sup>C NMR (CDCl<sub>3</sub>) δ 158.45, 147.28, 137.78, 125.07, 106.10, 62.47, 42.37, 31.76, 29.43, 29.31, 29.19, 27.00, 22.59, 14.04. Anal. Calcd. For C<sub>14</sub>H<sub>24</sub>N<sub>2</sub>O: C, 71.14; H, 10.23; N, 11.85. Found: C, 71.39; H, 10.26; N, 11.46.

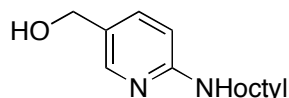

**5-Hydroxymethyl-2-*N*-benzylaminopyridine (Table 8, entry 8)** The general procedure C conducted with 2-chloro-5-hydroxymethylpyridine (0.144 g, 1.00 mmol), benzylamine (0.129 g, 1.20 mmol), Pd(OAc)<sub>2</sub> (1.1 mg, 5.0 × 10<sup>-3</sup> mmol), CyPF-*t*-Bu (2.8 mg, 5.0 × 10<sup>-3</sup> mmol) and lithium bis(trimethylsilyl)amide (0.402 g, 2.40 mmol) gave 117.9 mg (55%) of 5-Hydroxymethyl-2-*N*-benzylaminopyridine as a white solid. <sup>1</sup>H NMR (CD<sub>3</sub>OD) δ 7.89 (d, *J* = 2.0 Hz, 1 H), 7.43 (dd, *J* = 9.0, 2.0 Hz, 1 H), 7.32 (d, *J* = 7.0 Hz, 2 H), 7.27 (t, *J* = 7.0 Hz, 2 H), 7.19 (t, *J* = 7.0 Hz, 1 H), 6.52 (d, *J* = 9.0 Hz, 1 H), 4.89 (s, 2 H), 4.47 (s, 2 H), 4.41 (s, 2 H); <sup>13</sup>C NMR (CD<sub>3</sub>OD) δ 159.82, 147.27, 140.99, 138.96, 129.40, 128.28, 127.89, 126.32, 109.54, 62.74, 46.38. Anal. Calcd. For C<sub>13</sub>H<sub>14</sub>N<sub>2</sub>O: C, 72.87; H, 6.59; N, 13.07. Found: C, 72.60; H, 6.58; N, 12.90.

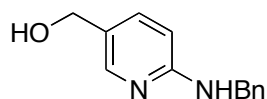

**General Procedure D Using K<sub>3</sub>PO<sub>4</sub> as the Base for Catalytic Amination of Functionalized Aryl Iodides.** The reaction conditions and average yields for each reaction are shown in Table 9. A typical procedure is given Table 6, entry 5.

**4-*N*-Octylamino-benzoic acid. (Table 9, entry 1)** 4-Chlorobenzoic acid (0.157 g, 1.00 mmol) was added to a 4 mL vial containing lithium bis(trimethylsilyl)amide (0.402 g, 2.40 mmol) in 1.0 mL of DME. Pd(OAc)<sub>2</sub> and CyPF-*t*-Bu (50.0 μL from stock solution A, 5.0 × 10<sup>-4</sup> mmol) were then added by syringe, followed by octylamine (0.155g, 1.20 mmol). The vial was sealed with a cap containing a PTFE septum, and the reaction mixture was stirred at 100° C for 20 h. The reaction mixture then was allowed to cool to room temperature. To the reaction mixture was added 1 M HCl (0.5-1.0 mL). The mixture was stirred at room temperature for 5 min and was then extracted with CH<sub>2</sub>Cl<sub>2</sub> (3 × 30.0 mL). The organic layer was separated and dried over Na<sub>2</sub>SO<sub>4</sub>. The solvent was evaporated, and the crude product was isolated by eluting with hexane/ethyl acetate (50/50) to give 202.2 mg (81%) of *N*-octylaminobenzoic acid as a white solid. <sup>1</sup>H NMR (CD<sub>3</sub>OD) δ 7.75 (d, *J* = 9.2 Hz, 2 H), 6.55 (d, *J* = 9.2 Hz, 2 H), 4.70-5.20 (s, b, 2 H), 3.09 (t, *J* = 7.2 Hz, 2 H), 1.59 (quint, *J* = 7.2 Hz, 2 H), 1.27-1.35 (m, 10 H), 0.88 (t, *J* = 7.0 Hz, 3 H); <sup>13</sup>C NMR (CD<sub>3</sub>OD) δ 171.02, 154.82, 132.92, 117.93, 112.09, 44.15, 33.17, 30.72, 30.60, 30.31, 28.40, 23.89, 14.62. Anal. Calcd. For: C<sub>15</sub>H<sub>23</sub>NO<sub>2</sub> C, 72.25; H, 9.30; N, 5.62. Found: C, 72.19; H, 9.43; N, 5.56.

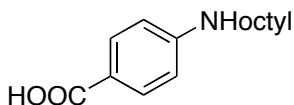

**4-*N*-Octylamino-benzoic acid.** (Table 9, entry 2) The general procedure C conducted with 4-bromobenzoic acid (0.201 g, 1.00 mmol), octylamine (0.155g, 1.20 mmol), Pd(OAc)<sub>2</sub> and CyPF-*t*-Bu (50.0 μL from stock solution A, 5.0 × 10<sup>-4</sup> mmol) gave 179.4 mg (72%) of *N*-octyl-aminobenzoic acid as a white solid. (<sup>1</sup>H and <sup>13</sup>C NMR spectra are the same as those for the product in Table 9, entry 1.)

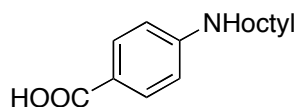

**4-*N*-sec-butylamino-benzoic acid** (Table 9, entry 3) The general procedure C conducted with 4-bromobenzoic acid (0.201 g, 1.00 mmol), *sec*-butylamine (87.8 mg, 1.20 mmol), Pd(OAc)<sub>2</sub> and CyPF-*t*-Bu (50.0 μL from stock solution A, 5.0 × 10<sup>-4</sup> mmol) and lithium bis(trimethylsilyl)amide (0.402 g, 2.40 mmol) gave 178.4 mg (92%) of 4-*N*-*sec*-butylbenzoic acid as a white solid. <sup>1</sup>H NMR (CDCl<sub>3</sub>) δ 7.25-9.00 (s, b, 1 H), 7.89 (d, *J* = 6.8 Hz, 2 H), 6.52 (d, *J* = 6.8 Hz, 2 H), 4.70-5.20 (s, b, 1H), 3.47 (sext, *J* = 5.2 Hz, 1 H), 1.46-1.62 (m, 2 H), 1.19 (d, *J* = 4.8 Hz, 3 H), 0.94 (t, *J* = 6.0 Hz, 3 H); <sup>13</sup>C NMR (CDCl<sub>3</sub>) δ 172.55, 152.03, 132.37, 116.67, 111.61, 49.53, 29.51, 20.04, 10.29. Anal. Calcd. For C<sub>11</sub>H<sub>15</sub>NO<sub>2</sub>: C, 68.37; H, 7.82; N, 7.25. Found: C, 68.35; H, 7.80; N, 7.17.

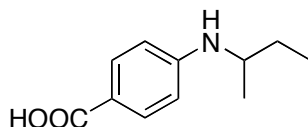

**4-*N*-sec-butylamino-benzoic acid** (Table 9, entry 4) The general procedure C conducted with 4-iodobenzoic acid (0.248 g, 1.00 mmol), *sec*-butylamine (87.8 mg, 1.20 mmol), Pd(OAc)<sub>2</sub> and CyPF-*t*-Bu (50.0 μL from stock solution A, 5.0 × 10<sup>-4</sup> mmol) and lithium bis(trimethylsilyl)amide (0.402 g, 2.40 mmol) gave 151.3 mg (92%) of 4-*N*-*sec*-butylbenzoic acid as a white solid. (<sup>1</sup>H and <sup>13</sup>C NMR spectra are the same as those for the product in Table 9, entry 3.)

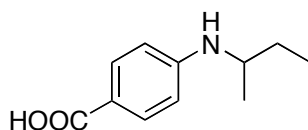

**4-*N*-Iso-Butylamino-benzamide** (Table 9, entry 5) The general procedure C conducted with 4-chlorobenzamide (0.156 g, 1.00 mmol), *iso*-butylamine (87.8 mg, 1.20 mmol), Pd(OAc)<sub>2</sub> (1.1 mg, 5.0 × 10<sup>-3</sup> mmol), CyPF-*t*-Bu (2.8 mg, 5.0 × 10<sup>-3</sup> mmol) and lithium bis(trimethylsilyl)amide (0.402 g, 2.40 mmol) gave 129.6 mg (67%) of 4-*N*-*iso*-butylamino-benzamide as a white solid. <sup>1</sup>H NMR (CDCl<sub>3</sub>) δ 7.63 (d, *J* = 7.2 Hz, 2 H), 6.53 (d, *J* = 7.2 Hz, 2 H), 5.96 (s, b, 2 H), 4.04 (s, b, 1 H), 2.94 (d, *J* = 5.2 Hz, 2 H), 1.86 (nonet, *J* = 5.2 Hz, 1 H), 0.95 (d, *J* = 5.6 Hz, 6 H); <sup>13</sup>C NMR (CDCl<sub>3</sub>) δ 169.50, 151.52, 129.23, 120.87, 111.48, 51.13, 27.98, 20.33. Anal. Calcd. For C<sub>11</sub>H<sub>16</sub>N<sub>2</sub>O: C, 68.72; H, 8.39; N, 14.57. Found: C, 68.70; H, 8.43; N, 14.32.

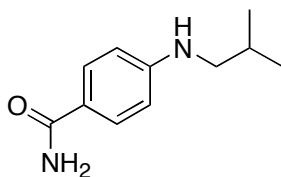

**4-*N*-Iso-Butylamino-benzamide (Table 9, entry 6)** The general procedure B conducted with 4-bromobenzamide (0.200 g, 1.00 mmol), *iso*-butylamine (87.8 mg, 1.20 mmol), Pd(OAc)<sub>2</sub> (1.1 mg, 5.0 × 10<sup>-3</sup> mmol), CyPF-*t*-Bu (2.8 mg, 5.0 × 10<sup>-3</sup> mmol) and lithium bis(trimethylsilyl)amide (0.402 g, 2.40 mmol) gave 162.5 mg (85%) of 4-*N*-Iso-Butylamino-benzamide as a white solid. (<sup>1</sup>H and <sup>13</sup>C NMR spectra are the same as those for the product in Table 9, entry 6.)

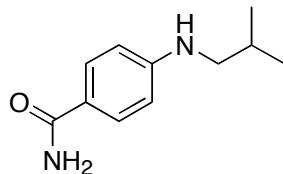

**4-*N*-octylamino-acetophenone (Table 9, entry 7)** The general procedure B conducted with 4'-chloro-acetophenone (0.155 g, 1.00 mmol), octylamine (0.155 g, 1.20 mmol), Pd(OAc)<sub>2</sub> (1.1 mg, 5.0 × 10<sup>-3</sup> mmol), CyPF-*t*-Bu (2.8 mg, 5.0 × 10<sup>-3</sup> mmol) and lithium bis(trimethylsilyl)amide (0.402 g, 2.40 mmol) in DME (5.0 mL) gave 225.6 mg (91%) of 4'-*N*-octylamino-acetophenone as a pale yellow liquid. <sup>1</sup>H NMR (CDCl<sub>3</sub>) δ 7.78 (d, *J* = 8.8 Hz, 2 H), 6.51 (d, *J* = 8.8 Hz, 2 H), 4.1 (s, b, 1H), 3.13 (q, *J* = 6.4 Hz, 2 H), 2.46 (s, 3 H), 1.60 (quint, *J* = 7.2 Hz, 2 H), 1.25-1.36 (m, 10 H), 0.86 (t, *J* = 6.8 Hz, 3 H); <sup>13</sup>C NMR (CDCl<sub>3</sub>) δ 196.13, 152.34, 130.72, 126.25, 111.13, 43.23, 31.70, 29.25, 29.21, 29.13, 26.98, 25.84, 22.55, 13.98. Anal. Calcd. For C<sub>16</sub>H<sub>25</sub>NO: C, 77.68; H, 10.19; N, 5.66. Found: C, 77.59; H, 10.32; N, 5.58.

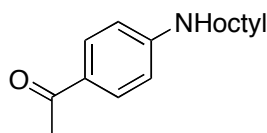

**4'-*N*-octylamino-acetophenone (Table 9, entry 8).** The general procedure D conducted with 4'-chloro-acetophenone (0.155 g, 1.00 mmol), octylamine (0.155 g, 1.20 mmol), Pd(OAc)<sub>2</sub> (1.1 mg, 5.0 × 10<sup>-3</sup> mmol), CyPF-*t*-Bu (2.8 mg, 5.0 × 10<sup>-3</sup> mmol) and potassium phosphate (0.254 g, 1.40 mmol) gave 178.5 mg (74%) of 4'-*N*-octylamino-acetophenone as a pale yellow liquid. (<sup>1</sup>H and <sup>13</sup>C NMR spectra are the same as those for the product in Table 9, entry 7.)

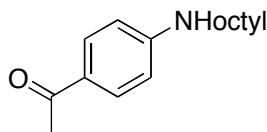

**4-*N*-octylamino-acetophenone (Table 9, entry 9)** The general procedure C conducted with 4'-chloro-acetophenone (0.155 g, 1.00 mmol), octylamine (0.155 g, 1.20 mmol), Pd(OAc)<sub>2</sub> and CyPF-*t*-Bu (50.0 μL from stock solution A, 5.0 × 10<sup>-4</sup> mmol) and lithium bis(trimethylsilyl)amide (0.402 g, 2.40 mmol) gave 151.2 mg (61%) of 4-*N*-octylamino-acetophenone as a pale yellow liquid. (<sup>1</sup>H and <sup>13</sup>C NMR spectra are the same as those for the product in Table 9, entry 7.)

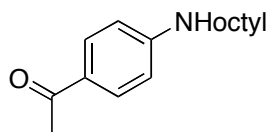

**4'-*N*-octylamino-acetophenone (Table 9, entry 10).** The general procedure D conducted with 4'-iodoacetophenone (0.246 g, 1.00 mmol), octylamine (0.155 g, 1.20 mmol), Pd(OAc)<sub>2</sub> (1.1 mg, 5.0 × 10<sup>-3</sup> mmol), CyPF-*t*-Bu (2.8 mg, 5.0 × 10<sup>-3</sup> mmol) and potassium phosphate (0.254 g, 1.40 mmol) gave 192.9 mg (78%) of 4'-*N*-octylamino-acetophenone as a pale yellow liquid. (<sup>1</sup>H and <sup>13</sup>C NMR spectra are the same as those for the product in Table 9, entry 7.)

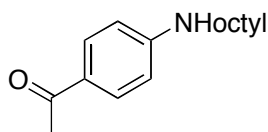

**4-*N*-cyclohexylamino-acetophenone (Table 9, entry 11)** The general procedure C conducted with 4'-chloro-acetophenone (0.155 g, 1.00 mmol), cyclohexylamine (0.119 g, 1.20 mmol), Pd(OAc)<sub>2</sub> (1.1 mg, 5.0 × 10<sup>-3</sup> mmol), CyPF-*t*-Bu (2.8 mg, 5.0 × 10<sup>-3</sup> mmol) and lithium bis(trimethylsilyl)amide (0.402 g, 2.40 mmol) gave 151.6 mg (87%) of 4-*N*-cyclohexylamino-acetophenone as a pale yellow liquid. <sup>1</sup>H NMR (CDCl<sub>3</sub>) δ 7.76 (dt, *J* = 9.0, 2.0 Hz, 2 H), 6.49 (dt, *J* = 9.0, 2.0 Hz, 2 H), 4.27 (s, b, 1H), 3.28-3.32 (m, 1 H), 2.44 (s, 3 H), 2.00 (dd, *J* = 12.5, 3.0 Hz, 2 H), 1.73 (dt, *J* = 13.0, 4.0 Hz, 2 H), 1.62 (dt, *J* = 13.0, 4.0 Hz, 1 H), 1.30-1.39 (m, 2 H), 1.12-1.23 (m, 3 H); <sup>13</sup>C NMR (CDCl<sub>3</sub>) δ 196.09, 151.29, 130.75, 125.88, 111.36, 51.09, 32.92, 25.79, 25.57, 24.70. Anal. Calcd. For: C<sub>14</sub>H<sub>19</sub>NO C, 77.38; H, 8.81; N, 6.45. Found: C, 77.44; H, 8.95; N, 6.55.

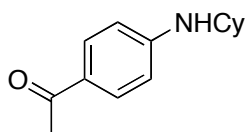

**4'-*N*-octylamino-acetophenone (Table 9, entry 12).** The general procedure D conducted with 4'-bromo-acetophenone (0.199 g, 1.00 mmol), cyclohexylamine (0.119 g, 1.20 mmol), Pd(OAc)<sub>2</sub> (2.2 mg, 1.0 × 10<sup>-2</sup> mmol), CyPF-*t*-Bu (5.5 mg, 1.0 × 10<sup>-2</sup> mmol) and potassium phosphate (0.254 g, 1.40 mmol) gave 142.9 mg (82%) of 4'-*N*-octylamino-acetophenone as a pale yellow liquid. (<sup>1</sup>H and <sup>13</sup>C NMR spectra are the same as those for the product in Table 9, entry 11.)

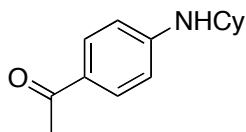

**4-*N*-Octylamino-acetanilide (Table 9, entry 13)** The general procedure C conducted with 4-bromoacetanilide (0.214 g, 1.00 mmol), octylamine (0.155 g, 1.20 mmol), Pd(OAc)<sub>2</sub> and CyPF-*t*-Bu (50.0 μL from stock solution A, 5.0 × 10<sup>-4</sup> mmol) and lithium bis(trimethylsilyl)amide (0.402 g, 2.40 mmol) gave 257 mg (98%) of 4-*N*-octyl-amino-acetanilide as a yellow solid. <sup>1</sup>H NMR (CD<sub>3</sub>OD) δ 7.18 (d, *J* = 8.5 Hz, 2 H), 6.51 (d, *J* = 8.5 Hz, 2 H), 2.95 (t, *J* = 7.2 Hz, 2 H), 1.99 (s, 3 H), 1.51 (quint, *J* = 7.2 Hz, 2 H), 1.23-1.33 (m, 10 H), 0.83 (t, *J* = 7.2 Hz, 3 H); <sup>13</sup>C NMR (CD<sub>3</sub>OD) δ 171.08, 147.56, 129.43, 123.29, 114.00, 45.35, 33.01, 30.62, 30.43, 30.39, 28.32, 23.72, 23.48, 14.48. Anal. Calcd. For C<sub>16</sub>H<sub>26</sub>N<sub>2</sub>O: C, 73.24; H, 9.99; N, 10.68. Found: C, 73.22; H, 10.10; N, 10.71.

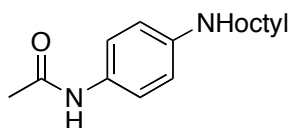



**4-*N*-Octylamino-acetanilide (Table 9, entry 14).** The general procedure C conducted with 4-iodoacetanilide (0.261 g, 1.00 mmol), octylamine (0.155 g, 1.20 mmol), Pd(OAc)<sub>2</sub> (1.1 mg, 0.50 mmol%), CyPF-*t*-Bu (2.7 mg, 0.50 mmol%) and lithium bis(trimethylsilyl)amide (0.402 g, 2.40 mmol) gave 176.2 mg (67%) of 4-*N*-octyl-amino-acetanilide as a yellow solid. (<sup>1</sup>H and <sup>13</sup>C NMR spectra are the same as those for the product in Table 9, entry 13.)

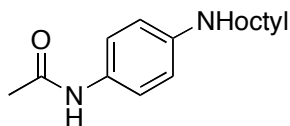

**3-*N*-cyclohexylamino-acetanilide (Table 9, entry 15)** The general procedure C conducted with 3-chloroacetanilide (0.170 g, 1.00 mmol), cyclohexylamine (0.119g, 1.20 mmol), Pd(OAc)<sub>2</sub> and CyPF-*t*-Bu (50.0 μL from stock solution A, 5.0 × 10<sup>-4</sup> mmol) and lithium bis(trimethylsilyl)amide (0.402 g, 2.40 mmol) gave 172.6 mg (74%) of 3-*N*-cyclohexylamino-acetanilide as a yellow solid. <sup>1</sup>H NMR (CDCl<sub>3</sub>) δ 7.81 (s, 1H), 7.02 (t, *J* = 6.4 Hz, 1 H), 6.99 (s, 1 H), 6.62 (d, *J* = 6.4 Hz, 1 H), 6.29 (d, *J* = 6.4 Hz, 1 H), 3.40 (s, b, 1H), 3.18 (tt, *J* = 8.0, 3.0 Hz, 1 H), 2.08 (s, 3 H), 1.98 (dd, *J* = 10.0, 2.0 Hz, 2 H), 1.70 (dt, *J* = 10.8, 2.8 Hz, 2 H), 1.59 (dt, *J* = 10.0, 3.0 Hz, 1 H), 1.26-1.34 (m, 2 H), 1.04-1.23 (m, 3 H); <sup>13</sup>C NMR (CDCl<sub>3</sub>) δ 168.64, 147.95, 139.03, 129.43, 108.80, 108.17, 104.75, 51.52, 31.22, 25.78, 24.84, 24.47. Anal. Calcd. For C<sub>14</sub>H<sub>20</sub>N<sub>2</sub>O: C, 72.38; H, 8.68; N, 12.06. Found: C, 72.24; H, 8.64; N, 11.85.

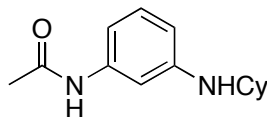

**4-*N*-*iso*Butylamino-benzylalcohol (Table 9, entry 16)** The general procedure C conducted with 4-bromobenzylalcohol (0.187 g, 1.00 mmol), *iso*-butylamine (87.8 mg, 1.20 mmol), Pd(OAc)<sub>2</sub> and CyPF-*t*-Bu (50.0 μL from stock solution A, 5.0 × 10<sup>-4</sup> mmol) and lithium bis(trimethylsilyl)amide (0.402 g, 2.40 mmol) gave 128.7 mg (72%) of 4-*N*-*iso*butylamino-benzylalcohol as a yellow liquid. <sup>1</sup>H NMR (CDCl<sub>3</sub>) δ 7.15 (d, *J* = 8.0 Hz, 2 H), 6.56 (d, *J* = 8.0 Hz, 2 H), 4.50 (s, 2 H), 3.00-3.80 (s, br, 1 H), 2.91 (d, *J* = 7.2 Hz, 2 H), 1.84-1.91 (m, 1 H), 1.10-2.10 (s, br, 1 H), 0.96 (d, *J* = 7.2 Hz, 6 H); <sup>13</sup>C NMR (CDCl<sub>3</sub>) δ 148.25, 129.30, 128.82, 112.57, 65.35, 51.77, 27.93, 20.40.

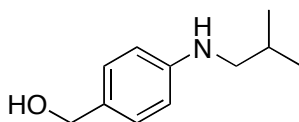

**4-*N*-*iso*Butylamino-benzylalcohol (Table 9, entry 17)** The general procedure C conducted with 4-iodobenzylalcohol (0.234 g, 1.00 mmol), *iso*-butylamine (87.8 mg, 1.20 mmol), Pd(OAc)<sub>2</sub> (1.1 mg, 0.50 mmol%), CyPF-*t*-Bu (2.7 mg, 0.50 mmol%) and lithium bis(trimethylsilyl)amide (0.402 g, 2.40 mmol) gave 84.0 mg (47%) of 4-*N*-*iso*butylamino-benzylalcohol as a yellow liquid. (<sup>1</sup>H and <sup>13</sup>C NMR spectra are the same as those for the product in Table 9, entry 16.)

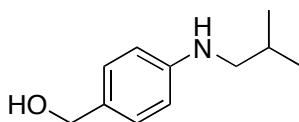

**1-(4-*N*-*sec*-Butylamino-phenyl)-ethanol. (Table 9, entry 18)** The general procedure C conducted with 4-chlorophenyl-1-ethanol (0.157 g, 1.00 mmol), *sec*-butylamine (87.8 mg, 1.20 mmol), Pd(OAc)<sub>2</sub> (1.1 mg, 5.0 × 10<sup>-3</sup> mmol), CyPF-*t*-Bu (2.8 mg, 5.0 × 10<sup>-3</sup> mmol) and lithium bis(trimethylsilyl)amide (0.402 g, 2.40 mmol) gave 160.7 mg (83%) of 1-(*N*-*sec*-butylamino-phenyl)-ethanol as a pale yellow liquid. <sup>1</sup>H NMR (CDCl<sub>3</sub>) δ 7.15 (d, *J* = 8.8 Hz, 2 H), 6.54 (d, *J* = 8.0 Hz, 2 H), 4.74 (q, *J* = 6.6 Hz, 1 H), 3.38 (sext, *J* = 6.2 Hz, 1 H), 3.00 (s, b, 1H), 2.20 (s, b, 1 H), 1.54-1.62 (m, 1 H), 1.41-1.51 (m, 1 H), 1.44 (d, *J* = 6.4 Hz, 3 H), 1.16 (d, *J* = 6.0 Hz, 3 H), 0.95 (t, *J* = 7.4 Hz, 3 H); <sup>13</sup>C NMR (CDCl<sub>3</sub>) δ 147.03, 133.93, 126.56, 112.84, 69.93, 49.73, 29.46, 24.52, 20.08, 10.26. Anal. Calcd. For C<sub>12</sub>H<sub>19</sub>NO: C, 74.57; H, 9.91; N, 7.25. Found: C, 74.20; H, 9.86; N, 7.20.

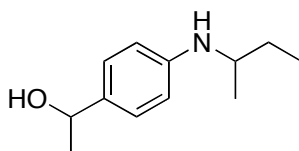

**1-(4-*N*-octylamino-phenyl)-ethanol. (Table 9, entry 19)** The general procedure C conducted with 4-chlorophenyl-1-ethanol (0.157 g, 1.00 mmol), octylamine (0.155 g, 1.20 mmol), Pd(OAc)<sub>2</sub> (1.1 mg, 5.0 × 10<sup>-3</sup> mmol), CyPF-*t*-Bu (2.8 mg, 5.0 × 10<sup>-3</sup> mmol) and lithium bis(trimethylsilyl)amide (0.402 g, 2.40 mmol) gave 219.8 mg (89%) of 1-(*N*-octylamino-phenyl)-ethanol as a pale yellow liquid. <sup>1</sup>H NMR (CDCl<sub>3</sub>) δ 7.01 (d, *J* = 8.4 Hz, 2 H), 6.55 (d, *J* = 8.0 Hz, 2 H), 3.77 (t, *J* = 6.4 Hz, 2 H), 3.40 (s, b, 1 H), 3.07 (t, *J* = 6.8 Hz, 2 H), 2.73 (t, *J* = 6.4 Hz, 2 H), 1.58 (quint, *J* = 7.2 Hz, 2 H), 1.28-1.40 (m, 11 H), 0.88 (t, *J* = 6.8 Hz, 3 H); <sup>13</sup>C NMR (CDCl<sub>3</sub>) δ 147.19, 129.76, 126.56, 112.97, 63.92, 44.19, 38.27, 31.79, 29.59, 29.38, 29.22, 27.15, 22.61, 14.04. Anal. Calcd. For C<sub>16</sub>H<sub>27</sub>NO: C, 77.06; H, 10.91; N, 5.62. Found: C, 77.21; H, 11.13; N, 5.61.

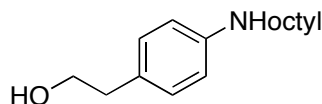

**3-Hydroxy-*N*-benzyl-aniline (Table 9, entry 20)** The general procedure C conducted with 3-chlorophenol (0.129 g, 1.00 mmol), benzylamine (0.129 g, 1.20 mmol), Pd(OAc)<sub>2</sub> (1.1 mg, 5.0 × 10<sup>-3</sup> mmol), CyPF-*t*-Bu (2.8 mg, 5.0 × 10<sup>-3</sup> mmol) and lithium bis(trimethylsilyl)amide (0.402 g, 2.40 mmol) gave 168.1 mg (84%) of 3-hydroxy-*N*-benzyl-aniline as a pale yellow solid. <sup>1</sup>H NMR (CDCl<sub>3</sub>) δ 7.34-7.42 (m, 5 H), 7.07 (t, *J* = 8.0 Hz, 1 H), 6.29 (dd, *J* = 8.6, 1.8 Hz, 1 H), 6.26 (dd, *J* = 8.0, 2.4 Hz, 1 H), 6.16 (t, *J* = 2.2 Hz, 1 H), 4.50-5.50 (s, b, 2H), 4.29 (s, 2 H); <sup>13</sup>C NMR (CDCl<sub>3</sub>) δ 156.47, 149.46, 139.01, 130.18, 128.53, 127.44, 127.16, 106.01, 104.92, 100.12, 48.17. Anal. Calcd. For C<sub>13</sub>H<sub>13</sub>NO: C, 78.36; H, 6.58; N, 7.03. Found: C, 78.17; H, 6.51; N, 6.84.

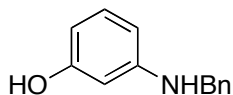

**3-Hydroxy-*N*-benzyl-aniline (Table 9, entry 21)** The general procedure C conducted with 3-bromophenol (0.172 g, 1.00 mmol), benzylamine (0.129 g, 1.20 mmol), Pd(OAc)<sub>2</sub> (1.1 mg, 5.0 × 10<sup>-3</sup> mmol), CyPF-*t*-Bu (2.8 mg, 5.0 × 10<sup>-3</sup> mmol) and lithium bis(trimethylsilyl)amide (0.402 g, 2.40 mmol) gave 170.1 mg (85%) of 3-hydroxy-*N*-benzyl-aniline as a pale yellow solid. (<sup>1</sup>H and <sup>13</sup>C NMR spectra are the same as those for the product in Table 9, entry 20.)

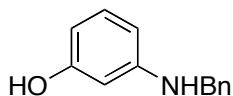

**3-Hydroxy-*N*-cyclohexyl-aniline**<sup>21</sup> (Table 9, entry 22) The general procedure C conducted with 3-bromophenol (0.172 g, 1.00 mmol), cyclohexylamine (0.119g, 1.20 mmol), Pd(OAc)<sub>2</sub> (1.1 mg, 5.0 × 10<sup>-3</sup> mmol), CyPF-*t*-Bu (2.8 mg, 5.0 × 10<sup>-3</sup> mmol) and lithium bis(trimethylsilyl)amide (0.402 g, 2.40 mmol) gave 154.6 mg (81%) of 3-hydroxy-*N*-cyclohexyl-aniline as a pale yellow solid. <sup>1</sup>H NMR (CDCl<sub>3</sub>) δ 6.98 (t, *J* = 7.6 Hz, 1 H), 6.19 (dd, *J* = 8.0, 1.6 Hz, 1 H), 6.16 (dd, *J* = 8.0, 1.6 Hz, 1 H), 6.05 (t, *J* = 2.0 Hz, 1 H), 4.70 (s, br, 2 H), 3.15 (tt, *J* = 10.0, 4.0 Hz, 1 H), 2.02 (dd, *J* = 12.8, 2.4 Hz, 2 H), 1.72 (dt, *J* = 13.2, 3.6 Hz, 2 H), 1.62 (dt, *J* = 12.0, 3.6 Hz, 1 H), 1.26-1.37 (m, 2 H), 1.04-1.23 (m, 3 H); <sup>13</sup>C NMR (CDCl<sub>3</sub>) δ 148.25, 129.30, 128.82, 112.57, 65.35, 51.77, 27.93, 20.40.

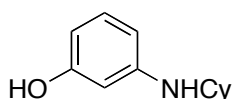

**3-Hydroxy-*N*-cyclohexyl-aniline**<sup>21</sup> (Table 9, entry 23). The general procedure C conducted with 3-iodophenol (0.220 g, 1.00 mmol), cyclohexylamine (0.119 g, 1.20 mmol), Pd(OAc)<sub>2</sub> (2.2 mg, 1.0 mmol%), CyPF-*t*-Bu (5.5 mg, 1.0 mmol%) and lithium bis(trimethylsilyl)amide (0.402 g, 2.40 mmol) gave 133.8 mg (70%) of 3-hydroxy-*N*-cyclohexyl-aniline as a pale yellow solid. (<sup>1</sup>H and <sup>13</sup>C NMR spectra are the same as those for the product in Table 9, entry 22.)

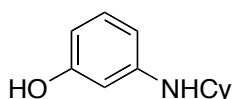

**4-Hydroxy-*N*-octyl-aniline** (Table 9, entry 24) The general procedure C conducted with 4-chlorophenol (0.129 g, 1.00 mmol), octylamine (0.155g, 1.20 mmol), Pd(OAc)<sub>2</sub> (1.1 mg, 5.0 × 10<sup>-3</sup> mmol), CyPF-*t*-Bu (2.8 mg, 5.0 × 10<sup>-3</sup> mmol) and lithium bis(trimethylsilyl)amide (0.402 g, 2.40 mmol) gave 159.6 mg (72%) of 4-hydroxy-*N*-octyl-aniline as a white solid. <sup>1</sup>H NMR (CDCl<sub>3</sub>) δ 6.62 (d, *J* = 6.4 Hz, 2 H), 6.53 (d, *J* = 6.4 Hz, 2 H), 4.50-5.20 (s, b, 2 H), 3.02 (t, *J* = 6.8 Hz, 2 H), 1.56 (quint, *J* = 7.0 Hz, 2 H), 1.27-1.35 (m, 10 H), 0.88 (t, *J* = 7.0 Hz, 3 H); <sup>13</sup>C NMR (CDCl<sub>3</sub>) δ 148.45, 141.73, 116.28, 115.29, 45.68, 31.76, 29.42, 29.35, 29.19, 27.11, 22.60, 14.06. Anal. Calcd. For C<sub>14</sub>H<sub>23</sub>NO: C, 75.97; H, 10.47; N, 6.33. Found: C, 75.88; H, 10.57; N, 6.33.

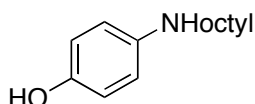

**Methyl-4-(*isobutylamino*)-benzoate** (Table 9, entry 25). The general procedure D conducted with methyl-4-chlorobenzoate (0.1719 mg, 1.00 mmol), *isobutylamine* (0.119 g, 1.20 mmol), Pd(OAc)<sub>2</sub> (2.2 mg, 1.0 × 10<sup>-2</sup> mmol), CyPF-*t*-Bu (5.5 mg, 1.0 × 10<sup>-2</sup> mmol) and potassium phosphate (0.254 mg, 1.40 mmol) gave 194.4 mg (94%) of methyl-4-(*isobutylamino*)-benzoate as a white solid. <sup>1</sup>H NMR (CDCl<sub>3</sub>) δ 7.83 (d, *J* = 8.5 Hz, 2 H), 6.51 (d, *J* = 8.5 Hz, 2 H), 4.32 (s, 1 H), 3.81 (s, 3 H), 2.93 (t, *J* = 6.5 Hz, 2 H), 1.86 (nonet, *J* = 6.8 Hz, 1 H), 0.95 (d, *J* = 6.5 Hz, 6 H); <sup>13</sup>C NMR (CDCl<sub>3</sub>) δ 167.30, 152.23, 131.41, 117.54, 111.14, 51.32, 50.88, 27.84, 20.21. Anal. Calcd. For: C<sub>12</sub>H<sub>17</sub>NO<sub>2</sub> C, 69.54; H, 8.27; N, 6.76. Found: C, 69.46; H, 8.39; N, 6.80.

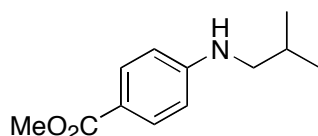

**Ethyl-4-(*sec*-butylamino)-benzoate (Table 9, entry 26).** The general procedure D conducted with ethyl-4-iodobenzoate (0.276 mg, 1.00 mmol), *sec*-butylamine (87.8 mg, 1.20 mmol), Pd(OAc)<sub>2</sub> (4.4 mg, 2.0 mmol%) and CyPF-*t*-Bu (11.0 mg, 2.0 mmol%) and potassium phosphate (0.254 g, 1.40 mmol) gave 169.7 mg (77%) of Ethyl-4-(*sec*-butylamino)-benzoate as a white solid. <sup>1</sup>H NMR (CDCl<sub>3</sub>) δ 7.82 (d, *J* = 8.5 Hz, 2 H), 6.49 (d, *J* = 8.5 Hz, 2 H), 4.29 (q, *J* = 7.0 Hz, 2 H), 3.98 (d, *J* = 6.0 Hz, 1 H), 3.44 (hept, *J* = 6.5 Hz, 1 H), 1.44-1.62 (m, 2 H), 1.33 (t, *J* = 7.0 Hz, 3 H), 1.16 (d, *J* = 6.5 Hz, 3 H), 0.93 (t, *J* = 7.5 Hz, 3 H); <sup>13</sup>C NMR (CDCl<sub>3</sub>) δ 166.87, 151.36, 131.50, 117.84, 111.50, 60.02, 49.36, 29.43, 19.98, 14.38, 10.24. Anal. Calcd. For C<sub>13</sub>H<sub>19</sub>NO<sub>2</sub>: C, 70.56; H, 8.65; N, 6.33. Found: C, 70.46; H, 8.64; N, 6.23.

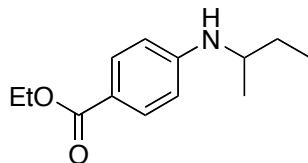

**Methyl-3-(*isobutylamino*)-benzoate (Table 9, entry 27).** The general procedure D conducted with methyl-3-chlorobenzoate (0.172 mg, 1.00 mmol), *isobutylamine* (0.119 g, 1.20 mmol), Pd(OAc)<sub>2</sub> (2.2 mg, 1.0 × 10<sup>-2</sup> mmol), CyPF-*t*-Bu (5.5 mg, 1.0 × 10<sup>-2</sup> mmol) and potassium phosphate (0.254 mg, 1.40 mmol) gave 187.7 mg (91%) of methyl-3-(*isobutylamino*)-benzoate as a white solid. <sup>1</sup>H NMR (CDCl<sub>3</sub>) δ 7.26 (d, *J* = 7.6 Hz, 1 H), 7.18 (t, *J* = 2.0 Hz, 1 H), 7.12 (t, *J* = 7.6 Hz, 1 H), 6.68 (dd, *J* = 7.6, 2.0 Hz, 1 H), 3.80 (s, 3 H), 3.75-3.95 (s, br, 1 H), 2.87 (d, *J* = 6.8 Hz, 2 H), 1.80 (nonet, *J* = 6.8 Hz, 1 H), 0.90 (d, *J* = 6.8 Hz, 6 H); <sup>13</sup>C NMR (CDCl<sub>3</sub>) δ 167.54, 148.47, 130.86, 129.04, 117.95, 117.02, 113.03, 51.94, 51.55, 27.89, 20.37. Anal. Calcd. For: C<sub>12</sub>H<sub>17</sub>NO<sub>2</sub> C, 69.54; H, 8.27; N, 6.76. Found: C, 69.38; H, 8.27; N, 6.69.

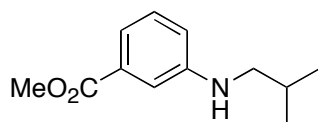

**Ethyl-3-(*isobutylamino*)-benzoate (Table 9, entry 28).** The general procedure D conducted with ethyl-3-bromobenzoate (0.215 mg, 1.00 mmol), *isobutylamine* (0.119 g, 1.20 mmol), Pd(OAc)<sub>2</sub> (2.2 mg, 1.0 × 10<sup>-2</sup> mmol), CyPF-*t*-Bu (5.5 mg, 1.0 × 10<sup>-2</sup> mmol) and potassium phosphate (0.254 mg, 1.40 mmol) gave 167.5 mg (81%) of Ethyl-3-(*isobutylamino*)-benzoate as a white solid. (<sup>1</sup>H and <sup>13</sup>C NMR spectra are the same as those for the product in Table 9, entry 27.)

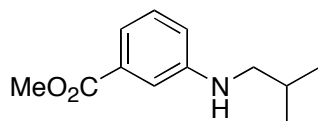

**Methyl-2-(benzylamino)-benzoate (Table 9, entry 29).** The general procedure D conducted with methyl-2-chlorobenzoate (0.172 mg, 1.00 mmol), benzylamine (0.119 g, 1.20 mmol), Pd(OAc)<sub>2</sub> (4.4 mg, 2.0 × 10<sup>-2</sup> mmol), CyPF-*t*-Bu (11.0 mg, 2.00 × 10<sup>-2</sup> mmol) and potassium phosphate (0.254 mg, 1.40 mmol) gave 197.7 mg (82%) of methyl-2-(benzylamino)-benzoate as a white solid. <sup>1</sup>H NMR (CDCl<sub>3</sub>) δ 8.22 (s, 1 H), 7.96 (dd, *J* = 8.0, 2.0 Hz, 1 H), 7.26-7.39 (m, 6 H), 6.66 (d, *J* = 8.5 Hz, 1 H), 6.62 (td, *J* = 8.0, 1.0 Hz, 1 H), 4.47 (d, *J* = 5.5 Hz, 2 H), 3.88 (s, 3 H); <sup>13</sup>C NMR (CDCl<sub>3</sub>) δ 169.06, 150.89, 138.79, 134.56, 131.56, 128.62, 127.08, 127.00, 114.79, 111.59, 110.07, 51.42, 46.86.

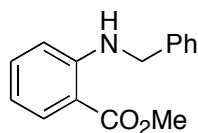

**4-Nitro-*N*-octyl-aniline (Table 9, entry 30).** The general procedure conducted with 4-nitro-1-iodobenzene (0.249 mg, 1.00 mmol), octylamine (0.155 g, 1.20 mmol), Pd(OAc)<sub>2</sub> (2.2 mg, 1.0 mmol%), CyPF-*t*-Bu (5.5 mg, 1.0 mmol%) and potassium phosphate (0.254 g, 1.40 mmol) gave 198.0 mg (79%) of 4-nitro-*N*-octyl-aniline as a white solid. <sup>1</sup>H NMR (CDCl<sub>3</sub>) δ 8.05 (d, *J* = 9.0 Hz, 2 H), 6.49 (d, *J* = 9.0 Hz, 2 H), 4.55 (s, 1 H), 3.17 (q, *J* = 7.0 Hz, 2 H), 1.62 (quint, *J* = 7.0 Hz, 2 H), 1.21-1.39 (m, 10 H), 0.86 (t, *J* = 7.0 Hz, 3 H); <sup>13</sup>C NMR (CDCl<sub>3</sub>) δ 153.49, 137.60, 126.46, 110.83, 43.35, 31.70, 29.21, 29.13, 29.02, 26.92, 22.57, 14.03. Anal. Calcd. For C<sub>14</sub>H<sub>22</sub>N<sub>2</sub>O<sub>2</sub>: C, 67.17; H, 8.86; N, 11.19. Found: C, 67.09; H, 8.99; N, 11.11.

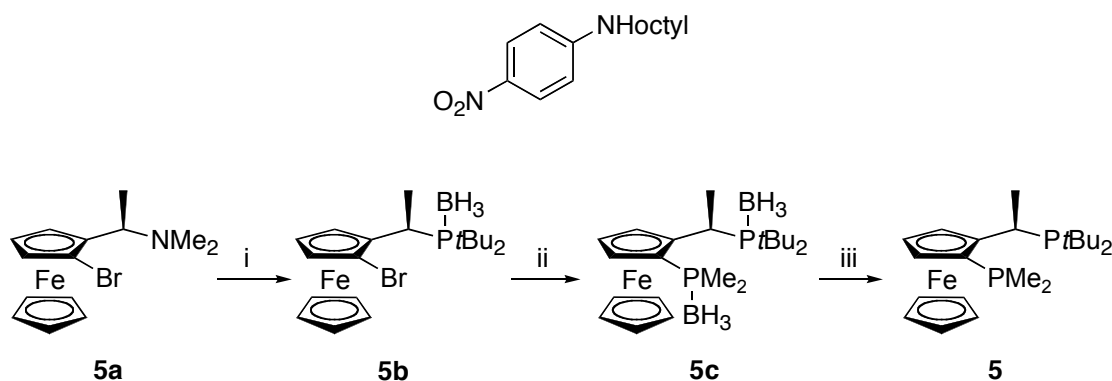

**Reagents and conditions:** Compound **5a** was prepared according to the reported procedure. i. a) HPtBu<sub>2</sub>, AcOH, 100 °C, 3 h; b) BH<sub>3</sub>, THF, 10 min; ii. a) *t*BuLi, THF, -78 °C, 35 min, CIPMe<sub>2</sub>, overnight, RT; b) BH<sub>3</sub>, THF, 10 min; iii. Morpholine, 100 °C, 4 h.

**Preparation of Racemic MePF-*t*-Bu 5 [CpFe(C<sub>5</sub>H<sub>3</sub>(CH(Me)PtBu<sub>2</sub>(PMe<sub>2</sub>))-1,2].** A red solution of compound **5a** (0.182 g, 0.540 mmol) and HPtBu<sub>2</sub> (79.3 mg, 0.540 mmol) in 2.0 mL acetic acid was heated at 100 °C for 3 h. The solvent was removed under reduced pressure, and 2 mL of THF was added. To the solution was added 5.0 mL of BH<sub>3</sub>•THF (1.0 M). The resulting solution was stirred for 10 min, after which time 5 mL of MeOH was added slowly with cooling in an ice bath to quench the excess BH<sub>3</sub>. The solvent was removed under reduced pressure, and the residue was purified by flash chromatography (hexane/ethyl acetate, 90/10) to give 231.4 mg (95%) to give the product **5b** as an orange solid. <sup>1</sup>H NMR (C<sub>6</sub>D<sub>6</sub>) δ 4.30-4.31 (m, 1 H), 4.26-4.28 (m, 1 H), 4.08 (s, 5 H), 3.87-3.88 (m, 1 H), 3.28 (dq, *J* = 11.0, 7.5 Hz, 1 H), 1.94 (dd, *J* = 12.2, 7.4 Hz, 3 H), 1.35 (d, *J* = 12.0 Hz, 9 H), 1.26 (d, *J* = 12.0 Hz, 9 H), -0.2-1.0 (br, 3 H); <sup>31</sup>P {<sup>1</sup>H} NMR (C<sub>6</sub>D<sub>6</sub>) δ 60.3 (m). Anal. Calcd. For C<sub>20</sub>H<sub>33</sub>BBrFeP: C, 53.26; H, 7.38. Found: C, 53.47; H, 7.51.

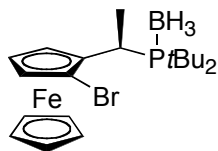

To a solution of **5b** (0.143 mg, 0.320 mmol) in THF (6.0 mL) was added a solution of *t*BuLi (1.5 M in hexane) in hexane (227 μL, 0.340 mmol) at -78 °C. The resulting solution was stirred for 2 h at -78 °C. A solution of CIPMe<sub>2</sub> (33.0 mg, 27.0 μL, 0.350 mmol) in 3.0 mL of Et<sub>2</sub>O was added by syringe. The mixture was stirred overnight, and 5.0 mL of BH<sub>3</sub>•THF (1.0 M) was added. After 10 min, aqueous

saturated  $\text{NaHCO}_3$  (10 mL) was slowly added with cooling in an ice bath. The resulting organic layer and  $\text{Et}_2\text{O}$  extracts from the aqueous layer were combined, washed with  $2 \times 20$  mL of water, dried over  $\text{MgSO}_4$ , and concentrated to afford an organic powder. The  $\text{BH}_3$  protected compound **5c** was purified by flash chromatography (hexane/ethyl acetate, 90/10) to give 121.4 mg (85%) of the product **5c** as an orange solid.  $^1\text{H}$  NMR ( $\text{C}_6\text{D}_6$ )  $\delta$  4.72 (s, 1 H), 4.45 (t,  $J = 3.0$  Hz, 1 H), 4.27 (s, 5 H), 4.16-4.17 (m, 1 H), 3.71 (dq,  $J = 11.0, 7.5$  Hz, 1 H), 2.00 (dd,  $J = 11.0, 7.5$  Hz, 3 H), 1.66 (d,  $J = 10.0$  Hz, 3 H), 1.50 (d,  $J = 10.0$  Hz, 3 H), 1.40 (d,  $J = 12.0$  Hz, 9 H), 1.27 (d,  $J = 12.0$  Hz, 9 H), -0.5-1.3 (br, 6 H);  $^{31}\text{P}$   $\{^1\text{H}\}$  NMR ( $\text{C}_6\text{D}_6$ )  $\delta$  -3.03 (m), 57.3 (m).

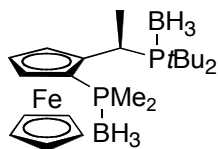

A red solution of **5c** (43.0 mg, 0.096 mmol) in 1.0 mL of morpholine was heated at  $100^\circ\text{C}$  for 3 h. The solvent was removed, and 5.0 mL of hexane was added. The red solution was filtered through a short plug of Celite, and the solvent was evaporated under reduced pressure. Ligand **5** was recrystallized from 5 mL of degassed  $\text{EtOH}$  to yield 38.1 mg (95%) of orange, microcrystalline product.  $^1\text{H}$  NMR ( $\text{C}_6\text{D}_6$ )  $\delta$  4.07-4.09 (m, 1 H), 4.05-4.06 (m, 1 H), 4.01-4.02 (m, 1 H), 3.99 (s, 5 H), 3.63 (qd,  $J = 7.0, 2.5$  Hz, 1 H), 1.74 (dd,  $J = 7.5, 3.0$  Hz, 3 H), 1.49 (d,  $J = 2.5$  Hz, 3 H), 1.37 (d,  $J = 10.5$  Hz, 9 H), 1.26 (d,  $J = 4.5$  Hz, 3 H), 1.10 (d,  $J = 11.0$  Hz, 9 H);  $^{31}\text{P}$   $\{^1\text{H}\}$  NMR ( $\text{C}_6\text{D}_6$ )  $\delta$  -65.04 (d,  $J = 36$  Hz), 51.96 (d,  $J = 36$  Hz).  $^{13}\text{C}$  NMR  $\delta$  101.98 (t,  $J = 24.2$  Hz), 79.90 (dd,  $J = 16.6, 3.9$  Hz), 69.65 (d,  $J = 4.0$  Hz), 67.68, 67.74 (d,  $J = 7.3$  Hz), 67.68, 33.78 (d,  $J = 29.6$  Hz), 33.86 (d,  $J = 29.6$  Hz), 31.86 (d,  $J = 13.6$  Hz), 31.60 (dd,  $J = 13.3$  Hz), 30.78 (dd,  $J = 33.7, 6.9$  Hz), 19.52 (t,  $J = 13.0$  Hz), 17.02 (d,  $J = 3.0$  Hz), 3.42 (dd,  $J = 11.3, 1.6$  Hz). Anal. Calcd. For  $\text{C}_{22}\text{H}_{36}\text{FeP}_2$ : C, 63.17; H, 8.67. Found: C, 62.94; H, 8.40.

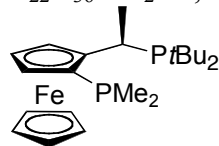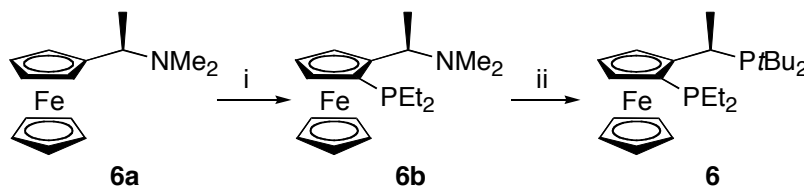

*Reagents and conditions:* i. a)  $n\text{BuLi}$ ,  $\text{Et}_2\text{O}$ , rt, overnight; b)  $\text{CIPet}_2$ ,  $\text{Et}_2\text{O}/\text{THF}$ , rt, overnight; ii.  $\text{HPtBu}_2$ ,  $\text{HOAc}$ ,  $100^\circ\text{C}$ , 1 h.

**Preparation of Racemic EtPF-*t*-Bu (6) [ $\text{CpFe}(\text{C}_5\text{H}_3(\text{CH}(\text{Me})\text{PtBu}_2(\text{PEt}_2))\text{-1,2}$ ].** To a solution of **6a** (1.43 g, 5.00 mmol) in  $\text{Et}_2\text{O}$  (10.0 mL) was added a solution of  $n\text{BuLi}$  (2.5 M in hexane) in hexane (2.10 mL, 5.25 mmol) at room temperature. The resulting solution was stirred overnight, and the clear orange solution became orange cloudy. A solution of  $\text{CIPet}_2$  (0.620 g, 5.00 mmol) in 10.0 mL of  $\text{Et}_2\text{O}$  was added through syringe. The mixture was stirred overnight. Aqueous saturated  $\text{NaHCO}_3$  (10 mL) was slowly added with cooling in an ice bath. The resulting organic layer and  $\text{Et}_2\text{O}$  extracts from the aqueous layer were combined, washed with  $2 \times 20$  mL of water, dried over  $\text{MgSO}_4$ , and concentrated to afford an orange powder. Compound **6b** was purified by flash chromatography (hexane/ethyl acetate, 90/10) to give 0.863g (50%) of the product **6b** as an orange solid.  $^1\text{H}$  NMR ( $\text{C}_6\text{D}_6$ )  $\delta$  4.30 (dd,  $J = 6.7, 3.0$  Hz, 1 H), 4.20 (s, 1 H), 4.15 (d,  $J = 2.4$  Hz, 1 H), 4.13 (s, 1 H), 4.07 (s, 5 H), 2.20 (s, 6 H),

1.83-1.88 (m, 4 H), 1.34 (dt,  $J = 16.2, 7.7$  Hz, 3 H), 1.23 (d,  $J = 6.8$  Hz, 3 H), 1.34 (dt,  $J = 15.3, 7.7$  Hz, 3 H);  $^{31}\text{P}$  { $^1\text{H}$ } NMR ( $\text{C}_6\text{D}_6$ )  $\delta$  -31.6 (s).

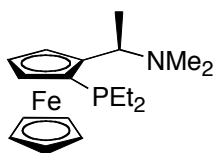**6b**

A red solution of compound **6b** (0.358 g, 1.04 mmol) and  $\text{HPtBu}_2$  (152.5 mg, 1.04 mmol) in 5.0 mL acetic acid was heated at 100 °C for 1 h. The solvent was removed under reduced pressure and 1.0 mL of  $\text{Et}_3\text{N}$  and 10 mL of pentane was added. The red solution was filtered through a short plug of Celite and the solvent was evaporated. Ligand **6** was recrystallized from 5 mL of degassed EtOH yield 139.2 mg (30%) of orange, microcrystalline product.  $^1\text{H}$  NMR ( $\text{C}_6\text{D}_6$ )  $\delta$  4.07-4.10 (m, 1 H), 4.02-4.04 (m, 2 H), 4.00 (s, 5 H), 3.64 (qd,  $J = 7.0, 2.5$  Hz, 1 H), 2.27 (dq,  $J = 14.0, 7.5, 1.5$  Hz, 1 H), 1.77-1.89 (m, 3 H), 1.75 (dd,  $J = 7.5, 3.0$  Hz, 3 H), 1.21 (dt,  $J = 16.5, 8.0$  Hz, 3 H), 1.10 (d,  $J = 10.5$  Hz, 9 H), 1.05 (dt,  $J = 9.5, 7.5$  Hz, 3 H), 1.10 (d,  $J = 10.5$  Hz, 9 H);  $^{31}\text{P}$  { $^1\text{H}$ } NMR ( $\text{C}_6\text{D}_6$ )  $\delta$  -35.75 (d,  $J = 25.7$  Hz), 51.73 (d,  $J = 25.3$  Hz).  $^{13}\text{C}$  NMR ( $\text{C}_6\text{D}_6$ )  $\delta$  102.00 (t,  $J = 23.0$  Hz), 77.10 (dd,  $J = 16.3, 3.8$  Hz), 70.04 (d,  $J = 4.7$  Hz), 69.73, 69.55 (d,  $J = 3.6$  Hz), 67.52, 34.13 (d,  $J = 30.1$  Hz), 33.80 (d,  $J = 30.1$  Hz), 31.93 (d,  $J = 14.1$  Hz), 31.65 (dd,  $J = 7.5, 2.5$  Hz), 30.79 (dd,  $J = 33.8, 7.5$  Hz), 21.10 (d,  $J = 14.5$  Hz), 20.99 (d,  $J = 14.5$  Hz), 17.17 (dd,  $J = 8.5, 2.1$  Hz), 11.82 (d,  $J = 23.9$  Hz), 8.97 (d,  $J = 4.2$  Hz). Anal. Calcd. For  $\text{C}_{24}\text{H}_{40}\text{FeP}_2$ : C, 64.58; H, 9.03. Found: C, 64.60; H, 8.75.

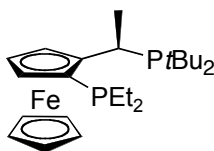**6**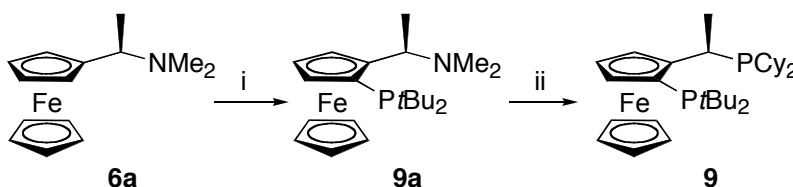

*Reagents and conditions:* i. a)  $n\text{BuLi}$ ,  $\text{Et}_2\text{O}$ , rt, overnight; b)  $\text{ClPtBu}_2$ ,  $\text{Et}_2\text{O}/\text{THF}$ , rt, overnight; ii.  $\text{HPCy}_2$ ,  $\text{HOAc}$ , 100 °C, 1 h.

**Preparation of Racemic  $t\text{BuPFCy}$  (**9**) [ $\text{CpFe}(\text{C}_5\text{H}_3(\text{CH}(\text{Me})\text{PCy}_2(\text{PtBu}_2)-1,2)$ ].** To a solution of **6a** (0.257 g, 1.00 mmol) in  $\text{Et}_2\text{O}$  (5.0 mL) was added a solution of  $n\text{BuLi}$  (2.5 M in hexane) in hexane (0.44 mL, 1.10 mmol) at room temperature. The resulting solution was stirred overnight, and the clear orange solution became orange cloudy. A solution of  $\text{ClPtBu}_2$  (0.180 g, 1.00 mmol) in 5.0 mL of  $\text{Et}_2\text{O}$  was added through syringe. The mixture was stirred overnight. Aqueous saturated  $\text{NaHCO}_3$  (10 mL) was slowly added with cooling in an ice bath. The resulting organic layer and  $\text{Et}_2\text{O}$  extracts from the aqueous layer were combined, washed with  $2 \times 20$  mL of water, dried over  $\text{MgSO}_4$ , and concentrated to afford an orange powder. Compound **9a** was purified by flash chromatography (hexane/ethyl acetate, 40/60) to give 0.381 g (95%) of the product **9a** as an orange solid.  $^1\text{H}$  NMR ( $\text{CDCl}_3$ )  $\delta$  4.25-4.30 (m, 1 H), 4.18-4.20 (m, 1 H), 4.12-4.15 (m, 1H), 4.06 (s, 5 H), 3.95-4.02 (m, 1 H), 2.25 (s, 6 H), 1.58 (d,  $J = 12.0$  Hz, 9 H), 1.28 (d,  $J = 7.2$  Hz, 3 H), 1.14 (d,  $J = 12.0$  Hz, 9 H);  $^{31}\text{P}$  { $^1\text{H}$ } NMR ( $\text{CDCl}_3$ )  $\delta$  13.8 (s).  $^{13}\text{C}$  NMR ( $\text{C}_6\text{D}_6$ )  $\delta$  100.12 (d,  $J = 27.9$  Hz), 78.88 (d,  $J = 40.6$  Hz), 72.64 (d,  $J = 6.3$  Hz),

70.44, 68.78, 68.01 (d,  $J = 4.6$  Hz), 56.30 (d,  $J = 13.1$  Hz), 40.33, 33.30 (d,  $J = 23.3$  Hz), 31.80 (d,  $J = 21.2$  Hz), 31.21 (d,  $J = 15.7$  Hz), 30.80 (d,  $J = 14.4$  Hz), 26.75 (d,  $J = 5.2$  Hz).

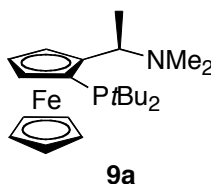

A red solution of compound **9a** (0.100 g, 0.250 mmol) and HPCy<sub>2</sub> (250 mg, 1.25 mmol) in 2.0 mL acetic acid was heated at 100 °C for 1 h. The solvent was removed under reduced pressure, and 1.0 mL of Et<sub>3</sub>N and 10 mL of pentane was added. The red solution was filtered through a short plug of Celite, and the solvent was evaporated. Ligand **9** was recrystallized from 5 mL of degassed EtOH to yield 131.2 mg (95%) of orange, microcrystalline product. <sup>1</sup>H NMR (C<sub>6</sub>D<sub>6</sub>) δ 4.35-4.39 (m, 1 H), 4.13-4.15 (m, 1 H), 4.12-4.13 (m, 1 H), 4.09 (s, 5 H), 3.22 (qd,  $J = 7.5, 4.0$  Hz, 1 H), 1.85-2.10 (m, 4 H), 1.65-1.82 (m, 6 H), 1.62 (dd,  $J = 7.5, 4.0$  Hz, 3 H), 1.53 (d,  $J = 12.0$  Hz, 9 H), 1.42-1.60 (m, 5 H), 1.20-1.40 (m, 7 H), 1.15 (dt,  $J = 11.0$  Hz, 9 H); <sup>31</sup>P {<sup>1</sup>H} NMR (C<sub>6</sub>D<sub>6</sub>) δ 12.12 (d,  $J = 24.4$  Hz), 9.52 (d,  $J = 24.4$  Hz). <sup>13</sup>C NMR (C<sub>6</sub>D<sub>6</sub>) δ 103.55 (dd,  $J = 28.7, 18.5$  Hz), 78.09 (dd,  $J = 37.7, 1.8$  Hz), 72.00 (d,  $J = 6.5$  Hz), 70.25, 68.50 (dd,  $J = 9.3, 4.6$  Hz), 68.23, 34.25 (d,  $J = 25.9$  Hz), 33.35 (d,  $J = 23.0$  Hz), 32.67 (dd,  $J = 19.4, 1.9$  Hz), 31.94 (d,  $J = 24.0$  Hz), 31.77 (d,  $J = 21.2$  Hz), 31.29 (d,  $J = 4.6$  Hz), 31.18 (d,  $J = 4.6$  Hz), 30.76 (d,  $J = 14.8$  Hz), 30.21 (d,  $J = 4.6$  Hz), 30.00 (d,  $J = 8.3$  Hz), 28.30 (d,  $J = 14.7$  Hz), 28.13 (d,  $J = 4.6$  Hz), 27.71 (d,  $J = 6.4$  Hz), 27.43 (d,  $J = 12.1$  Hz), 26.90, 26.30 (d,  $J = 13.8$  Hz), 26.11 (d,  $J = 12.8$  Hz), 19.54 (d,  $J = 1.8$  Hz). Anal. Calcd. For C<sub>32</sub>H<sub>52</sub>FeP<sub>2</sub>: C, 69.31; H, 9.45. Found: C, 69.08; H, 9.83.

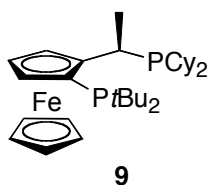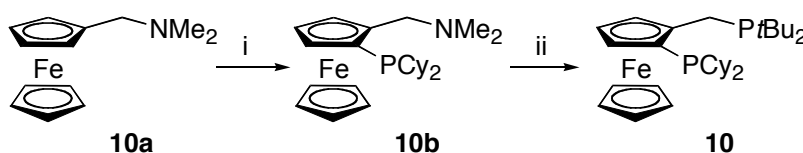

*Reagents and conditions:* i. a) *n*BuLi, Et<sub>2</sub>O, rt, overnight; b) CIPCy<sub>2</sub>, Et<sub>2</sub>O/THF, rt, overnight; ii. HPtBu<sub>2</sub>, HOAc, 100 °C, 1 h.

**Preparation of Racemic Ligand (10) [CpFe(C<sub>5</sub>H<sub>3</sub>(CH<sub>2</sub>PCy<sub>2</sub>)(PtBu<sub>2</sub>)-1,2].** To a solution of **10a** (0.243 g, 1.00 mmol) in Et<sub>2</sub>O (5.0 mL) was added a solution of *n*BuLi (2.5 M in hexane) in hexane (0.44 mL, 1.10 mmol) at room temperature. The resulting solution was stirred overnight, and the clear orange solution became orange cloudy. A solution of CIPCy<sub>2</sub> (0.233 g, 1.00 mmol) in 5.0 mL of Et<sub>2</sub>O was added through syringe. The mixture was stirred overnight. Aqueous saturated NaHCO<sub>3</sub> (10 mL) was slowly added with cooling in an ice bath. The resulting organic layer and Et<sub>2</sub>O extracts from the aqueous layer were combined, washed with 2 × 20 mL of water, dried over MgSO<sub>4</sub>, and concentrated to afford an orange powder. Compound **10b** was purified by flash chromatography (hexane/ethyl acetate, 50/50) to give 0.350 g (83%) of the product **10b** as an orange solid. <sup>1</sup>H NMR (CDCl<sub>3</sub>) δ 4.31 (s, 1 H), 4.18 (t,  $J = 2.4$  Hz, 1 H), 4.01 (s, 6 H), 3.61 (dd,  $J = 13.2, 2.0$  Hz, 1 H), 3.03 (d,  $J = 12.8$  Hz, 1



H), 2.28-2.29 (m, 1 H), 2.13 (s, 6 H), 1.94-1.98 (m, 3 H), 1.80-1.82 (m, 3 H), 1.54-1.71 (m, 6 H), 1.15-1.39 (m, 5 H), 1.04-1.06 (m, 4 H).  $^{31}\text{P}$   $\{^1\text{H}\}$  NMR ( $\text{CDCl}_3$ )  $\delta$  -12.13 (s).

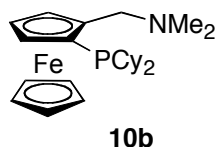

A red solution of compound **10b** (43.9 mg, 0.100 mmol) and  $\text{HPtBu}_2$  (16.2 mg, 0.100 mmol) in 1.0 mL acetic acid was heated at 80 °C for 5 h. The solvent was removed under reduced pressure, and 1.0 mL of  $\text{Et}_3\text{N}$  and 10 mL of pentane was added. The red solution was filtered through a short plug of Celite, and the solvent was evaporated. Ligand **10** was recrystallized from 5 mL of degassed EtOH to yield 52.2 mg (95%) of orange, microcrystalline product.  $^1\text{H}$  NMR ( $\text{C}_6\text{D}_6$ ) 4.65-4.68 (m, 1 H), 4.15-4.17 (m, 1 H), 4.10 (s, 5 H), 4.05-4.08 (m, 1 H), 2.74 (d,  $J$  = 16.8 Hz, 1 H), 2.63 (dd,  $J$  = 16.4, 4.4 Hz, 1 H), 2.26-2.30 (m, 1 H), 2.05-2.13 (m, 2 H), 1.61-1.87 (m, 9 H), 1.32-1.48 (m, 6 H), 1.21 (d,  $J$  = 10.8 Hz, 9 H), 1.10-1.22 (m, 4 H), 1.07 (d,  $J$  = 10.8 Hz, 9 H).  $^{31}\text{P}$   $\{^1\text{H}\}$  NMR ( $\text{C}_6\text{D}_6$ )  $\delta$  23.39 (s), -14.37 (s).  $^{13}\text{C}$  NMR ( $\text{C}_6\text{D}_6$ )  $\delta$  94.26 (dd,  $J$  = 23.6, 19.8 Hz), 79.64 (dd,  $J$  = 20.6, 3.8 Hz), 71.97 (dd,  $J$  = 13.7, 3.0 Hz), 70.23, 70.08, 67.87, 36.56 (dd,  $J$  = 14.6, 2.3 Hz), 35.90 (d,  $J$  = 13.0 Hz), 33.88 (d,  $J$  = 23.6 Hz), 32.05 (d,  $J$  = 24.4 Hz), 31.70 (d,  $J$  = 22.8 Hz), 31.64 (d,  $J$  = 13.0 Hz), 31.39 (d,  $J$  = 15.3 Hz), 30.47 (d,  $J$  = 4.6 Hz), 30.30 (d,  $J$  = 13.8 Hz), 30.14 (d,  $J$  = 14.5 Hz), 28.43 (d,  $J$  = 15.3 Hz), 27.99, 27.91 (d,  $J$  = 3.0 Hz), 27.64 (d,  $J$  = 10.0 Hz), 26.90, 22.38 (d,  $J$  = 10.7 Hz), 22.13 (d,  $J$  = 10.7 Hz); Anal. Calcd. For  $\text{C}_{31}\text{H}_{50}\text{FeP}_2$ : C, 68.88; H, 9.32. Found: C, 68.85; H, 9.47.

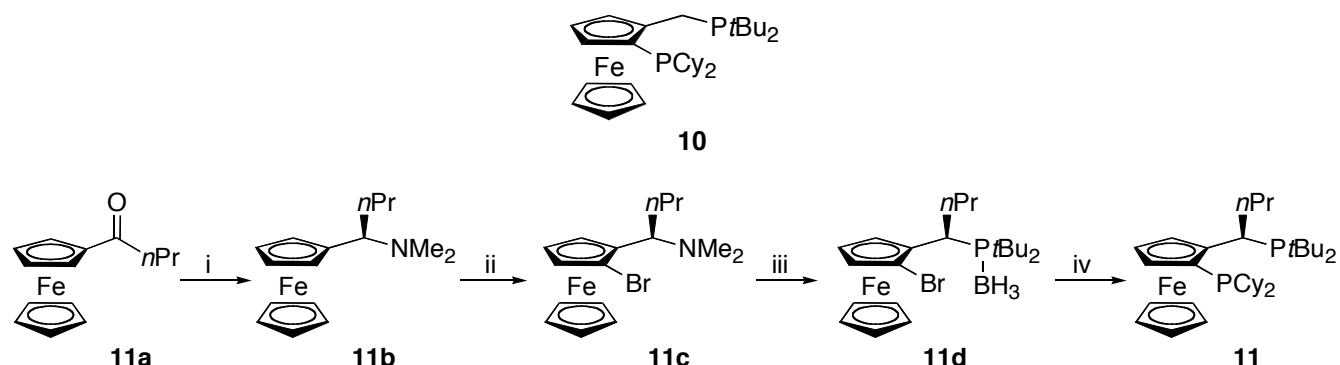

*Reagents and conditions:* Compound **11a** was prepared according to the reported procedure. i. a)  $\text{HNMe}_2$ ,  $\text{Et}_3\text{N}$ ,  $\text{TiCl}_4$ ,  $\text{CH}_2\text{Cl}_2$ , overnight; b)  $\text{NaCNBH}_3$ , MeOH, 0 °C, 1 h; ii. a)  $\text{Li}_2\text{PdCl}_4$ ,  $\text{Et}_3\text{N}$ , MeOH, overnight;  $\text{Br}_2$ ,  $\text{CH}_2\text{Cl}_2$ , 30 min; iii. a)  $\text{HPtBu}_2$ , AcOH, 100 °C, 3 h; b)  $\text{BH}_3$ , THF, 10 min; ii.  $t\text{BuLi}$ , THF, -78 °C, 2 h,  $\text{ClPCy}_2$ , overnight, RT; iv. Morpholine, 100 °C, 4 h.

**Preparation of Racemic Ligand (11) [ $\text{CpFe}(\text{C}_5\text{H}_3(\text{CH}(n\text{Pr})\text{PCy}_2)(\text{PtBu}_2)-1,2$ ].** To a dry 500 mL flask with septum was added compound **11a** (2.56 g, 10.0 mmol), dimethylamine hydrochloride (0.816 g, 10.0 mmol), triethylamine (3.0 g, 30 mmol) and  $\text{CH}_2\text{Cl}_2$  (60 mL) under nitrogen atmosphere. Titanium tetrachloride (0.6 mL, 5.0 mmol) was added slowly via syringe. The reaction was stirred overnight and quenched with a solution of  $\text{NaCNBH}_3$  (1.80 g, 30.0 mmol) in 30 mL of MeOH with cooling in an ice bath. The resulting mixture was allowed to stir for 1 h, and the pH was adjusted to 13 with 5 N NaOH. The resulting organic layer and EtOAc extracts from the aqueous layer were combined, washed with 2 × 50 mL of water, dried over  $\text{MgSO}_4$ , and concentrated to afford **11b** as a red oil. This compound was used without further purification.

A solution of **11b** (1.00 g, 3.52 mmol) in 70 mL of MeOH was added to the solution of triethylamine (1.06 mL, 7.00 mmol) and  $\text{Li}_2\text{PdCl}_4$  (0.926 g, 3.52 mmol) in 70 mL of MeOH. Orange precipitates formed after 0.5 h, and the mixture was allowed to stir overnight. The precipitate was filtered and washed with MeOH. The resulting orange solid was dissolved in 60.0 mL of  $\text{CH}_2\text{Cl}_2$ , and bromine (0.2 mL) in 70 mL of  $\text{CH}_2\text{Cl}_2$  was added dropwise. After stirring for 30 min, the solvent was removed under reduced pressure, and the residue was purified by flash chromatography (hexane/triethylamine, 80/20) to give 350 mg (40%) of the desired compound **11c** as a red oil.  $^1\text{H}$  NMR ( $\text{CDCl}_3$ )  $\delta$  4.43 (dd,  $J = 2.0, 1.0$  Hz, 1 H), 4.13 (s, 5 H), 4.10 (t,  $J = 2.5$  Hz, 1 H), 3.97 (dd,  $J = 2.5, 1.0$  Hz, 1 H), 3.60 (dd,  $J = 11.0, 3.5$  Hz, 1 H), 2.03 (s, 6 H), 1.93-2.01 (m, 1 H), 1.77-1.85 (m, 1 H), 1.61-1.68 (m, 1 H), 1.49-1.56 (m, 1 H), 1.04 (t,  $J = 7.5$  Hz, 3 H);  $^{13}\text{C}$  NMR ( $\text{CDCl}_3$ )  $\delta$  85.79, 79.51, 71.14, 69.47, 65.68, 65.50, 59.44, 40.89, 35.01, 20.57, 14.25. MS (m/e) 318 (100), 320 (100) ( $\text{M}^+ - \text{NMe}_2$ ).

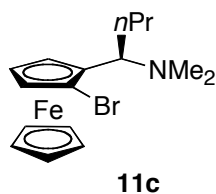

A red solution of compound **11c** (0.273 g, 0.750 mmol) and  $\text{HPtBu}_2$  (0.122 g, 0.750 mmol) in 5.0 mL acetic acid was heated at 100 °C for 1 h. The solvent was removed under reduced pressure, and 2 mL of THF was added. To the solution was added 5.0 mL of  $\text{BH}_3 \cdot \text{THF}$  (1.0 M). The resulting solution was stirred for 10 min, and 5 mL of MeOH was added slowly with cooling in an ice bath to quench the excess  $\text{BH}_3$ . The solvent was removed under reduced pressure, and the residue was purified by flash chromatography (hexane/ethyl acetate, 30/70) to give 341.3 mg (95%) of the product **11d** as an orange solid.  $^1\text{H}$  NMR ( $\text{CDCl}_3$ )  $\delta$  4.28 (s, 1 H), 4.15 (s, 1 H), 4.00 (s, 6 H), 2.55-2.59 (m, 1 H), 2.30-2.33 (m, 1 H), 1.51-1.87 (m, 3 H), 1.66 (d,  $J = 12.3$  Hz, 9 H), 1.01 (d,  $J = 12.3$  Hz, 9 H), 0.86 (t,  $J = 7.2$  Hz, 3 H), -0.5-0.8 (m, 3 H);  $^{31}\text{P}$   $\{^1\text{H}\}$  NMR ( $\text{CDCl}_3$ )  $\delta$  46.4 (m). Anal. Calcd. For  $\text{C}_{22}\text{H}_{37}\text{BBrFeP}$ : C, 55.16; H, 7.78. Found: C, 55.45; H, 7.89.

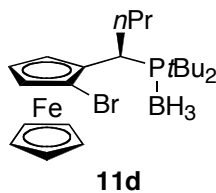

To a solution of **11d** (0.149 g, 0.310 mmol) in THF (6.0 mL) was added a solution of  $t\text{BuLi}$  (1.5 M in hexane) in hexane (227  $\mu\text{L}$ , 0.340 mmol) at  $-78$  °C. The resulting solution was stirred for 2 h at  $-78$  °C. A solution of  $\text{ClPCy}_2$  (79.3 g, 0.340 mmol) in 3.0 mL of  $\text{Et}_2\text{O}$  was added through syringe. The mixture was stirred overnight. Aqueous saturated  $\text{NaHCO}_3$  (10 mL) was slowly added with cooling in an ice bath. The resulting organic layer and  $\text{Et}_2\text{O}$  extracts from the aqueous layer were combined, washed with  $2 \times 20$  mL of water, dried over  $\text{MgSO}_4$ , and concentrated to afford an organic powder. The  $\text{BH}_3$  protected compound **11** $\cdot\text{BH}_3$  was purified by flash chromatography (hexane/ethyl acetate, 95/5) to give 157.2 mg (85%) of the product as an orange solid.  $^1\text{H}$  NMR ( $\text{CDCl}_3$ )  $\delta$  4.55-5.59 (m, 1 H), 4.24 (t,  $J = 2.5$  Hz, 1 H), 4.18-4.20 (m, 1 H), 4.08 (s, 5 H), 3.20 (dt,  $J = 12.0, 9.5$  Hz, 1 H), 2.31-2.41 (m, 2 H), 2.15-2.23 (m, 1 H), 1.98-2.05 (m, 3 H), 1.61-1.87 (m, 6 H), 1.32-1.54 (m, 6 H), 1.29 (d,  $J = 12.0$  Hz, 9 H), 1.22 (d,  $J = 12.5$  Hz, 9 H), 1.12-1.32 (m, 5 H), 1.00-1.10 (m, 3 H), 0.98 (t,  $J = 7.0$  Hz, 3 H), -0.50-0.80 (m, 3 H);  $^{31}\text{P}$   $\{^1\text{H}\}$  NMR ( $\text{CDCl}_3$ )  $\delta$  -20.38 (s), 61.08 (m).  $^{13}\text{C}$  NMR ( $\text{CDCl}_3$ )  $\delta$  99.83 (dd,  $J = 28.0, 4.2$  Hz), 84.78 (dd,  $J = 23.9, 4.7$  Hz), 71.45 (d,  $J = 4.7$  Hz), 70.94 (t,  $J = 3.1$  Hz), 69.50, 67.45,

41.42 (d,  $J = 13.5$  Hz), 40.47, 34.98 (d,  $J = 23.3$  Hz), 34.27-34.59 (4 C overlap), 32.88 (d,  $J = 14.8$  Hz), 32.50 (dd,  $J = 20.6, 15.1$  Hz), 31.34 (d,  $J = 13.0$  Hz), 30.14, 29.19 (d,  $J = 17.9$  Hz), 29.03, 28.25 (d,  $J = 2.9$  Hz), 27.73 (d,  $J = 3.1$  Hz), 27.60 (d,  $J = 10.9$  Hz), 27.31 (d,  $J = 11.3$  Hz), 26.90 (d,  $J = 2.8$  Hz), 24.56 (d,  $J = 3.3$  Hz), 24.49 (d,  $J = 3.3$  Hz), 14.43.

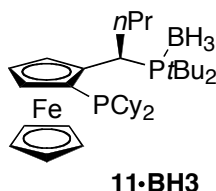

A red solution of **11•BH3** (50 mg, 0.083 mmol) in 1.0 mL of morpholine was heated at 100 °C for 1 h. The solvent was removed and 5.0 mL of hexane was added. The red solution was filtered through a short plug of Celite, and the solvent was evaporated under reduced pressure. Recrystallization of the residue from 3.0 mL of degassed EtOH yields 46.0 mg (95%) of ligand **11** as orange, microcrystalline product.  $^1\text{H}$  NMR ( $\text{C}_6\text{D}_6$ )  $\delta$  4.24-5.27 (m, 1 H), 4.08 (s, 6 H), 4.07-4.09 (m, 1 H), 3.24-3.29 (m, 1 H), 2.22-2.25 (m, 3 H), 2.12-2.24 (m, 2 H), 2.04-2.13 (m, 2 H), 1.90-2.03 (m, 1 H), 1.45-1.87 (m, 13 H), 1.39 (d,  $J = 10.0$  Hz, 9 H), 1.22 (d,  $J = 12.5$  Hz, 9 H), 1.12-1.32 (m, 5 H), 1.05 (t,  $J = 7.0$  Hz, 3 H);  $^{31}\text{P}$  { $^1\text{H}$ } NMR ( $\text{C}_6\text{D}_6$ )  $\delta$  -17.66 (d,  $J = 31.9$  Hz), 56.79 (d,  $J = 31.5$  Hz).  $^{13}\text{C}$  NMR ( $\text{C}_6\text{D}_6$ )  $\delta$  102.93 (dd,  $J = 26.0, 23.6$  Hz), 80.00 (dd,  $J = 24.7, 3.0$  Hz), 72.09 (d,  $J = 4.3$  Hz), 69.69, 69.08 (t,  $J = 3.6$  Hz), 67.49, 39.30 (d,  $J = 16.0, 3.4$  Hz), 36.51 (d,  $J = 1.7$  Hz), 35.97 (d,  $J = 6.2$  Hz), 35.82 (d,  $J = 6.6$  Hz), 35.52 (d,  $J = 7.0$  Hz), 35.16 (d,  $J = 7.5$  Hz), 33.92-34.31 (2 C overlap), 32.50 (d,  $J = 15.1$  Hz), 31.62-32.20 (3 C overlap), 30.12, 28.92 (d,  $J = 16.7$  Hz), 28.45 (d,  $J = 10.0$  Hz), 28.13 (d,  $J = 3.2$  Hz), 27.95 (d,  $J = 13.0$  Hz), 27.01 (d,  $J = 23.1$  Hz), 24.75, 15.01.

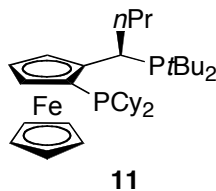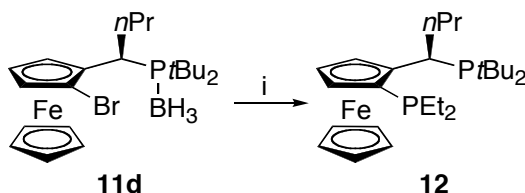

*Reagents and conditions:* i. a)  $n\text{BuLi}$ , THF,  $-78^\circ\text{C}$ , 2 h,  $\text{ClPEt}_2$ , overnight, RT; iv. Morpholine, 100 °C, 1 h.

To a solution of **11d** (90.2 mg, 0.200 mmol) in THF (1.0 mL) was added a solution of  $n\text{BuLi}$  (1.6 M in hexane) in hexane (133  $\mu\text{L}$ , 0.220 mmol) at  $-78^\circ\text{C}$ . The resulting solution was stirred for 2 h at  $-78^\circ\text{C}$ . A solution of  $\text{ClPEt}_2$  (24.9 g, 0.200 mmol) in 2.0 mL of  $\text{Et}_2\text{O}$  was added through syringe. The mixture was stirred overnight. Aqueous saturated  $\text{NaHCO}_3$  (10 mL) was slowly added with cooling in an ice bath. The resulting organic layer and  $\text{Et}_2\text{O}$  extracts from the aqueous layer were combined, washed with  $2 \times 20$  mL of water, dried over  $\text{MgSO}_4$ , and concentrated to afford an organic powder. A red solution of the organic powder in 1.0 mL of morpholine was heated at 100 °C for 1 h. The solvent was removed and 5.0 mL of hexane was added. The red solution was filtered through a short plug of Celite, and the solvent was evaporated under reduced pressure. Recrystallization of the residue from 2.0 mL

of degassed EtOH yields 76.0 mg (80%) of ligand **12** as orange, microcrystalline product.  $^1\text{H}$  NMR ( $\text{C}_6\text{D}_6$ )  $\delta$  4.00-4.08 (m, 3 H), 3.98 (s, 5 H), 3.35-3.45 (m, 1 H), 2.08-2.32 (m, 3 H), 1.70-2.06 (m, 4 H), 1.46-1.66 (m, 1 H), 1.34 (d,  $J = 10.0$  Hz, 9 H), 1.20 (dt,  $J = 8.0, 7.6$  Hz, 2 H), 0.95-1.18 (m, 7 H), 1.04 (t,  $J = 10.0$  Hz, 9 H);  $^{31}\text{P}$   $\{^1\text{H}\}$  NMR ( $\text{C}_6\text{D}_6$ )  $\delta$  -35.55 (d,  $J = 54.0$  Hz), 60.45 (d,  $J = 54.0$  Hz).  $^{13}\text{C}$  NMR ( $\text{C}_6\text{D}_6$ )  $\delta$  100.44 (t,  $J = 23.6$  Hz), 76.66 (dd,  $J = 18.3, 6.0$  Hz), 70.41 (d,  $J = 4.6$  Hz), 70.02, 68.74, 67.02, 36.31 (d,  $J = 33.6$  Hz), 34.47, 34.10 (dd,  $J = 36.6, 3.0$  Hz), 33.99 (d,  $J = 32.1$  Hz), 31.97 (d,  $J = 15.3$  Hz), 31.69 (d,  $J = 13.8$  Hz), 24.39, 21.74 (t,  $J = 13.8$  Hz), 18.33 (d,  $J = 9.9, 4.6$  Hz), 15.13, 11.95 (d,  $J = 23.7$  Hz), 9.64 (d,  $J = 6.0$  Hz). Anal. Calcd. For  $\text{C}_{26}\text{H}_{44}\text{FeP}$ : C, 65.82; H, 9.35. Found: C, 65.94; H, 9.13.

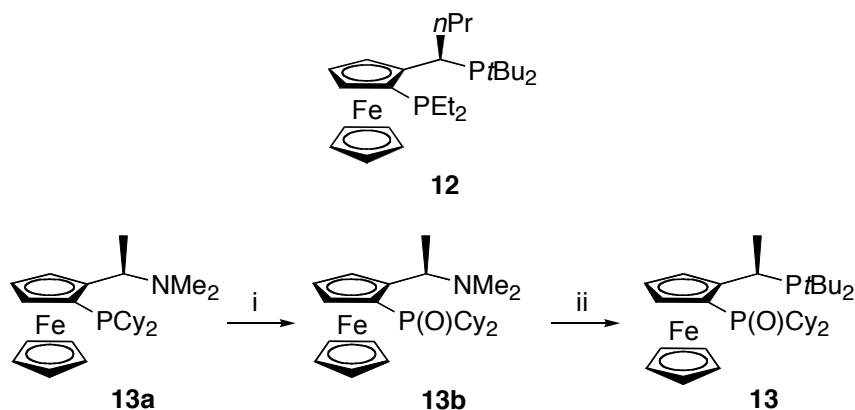

*Reagents and conditions:* i. a)  $\text{H}_2\text{O}_2$ , MeOH, room temperature, 1 h; ii.  $\text{HPtBu}_2$ , HOAc, 100 °C, 1 h.

**Preparation of Racemic Ligand 13** [ $\text{Cp}^*\text{Fe}(\text{C}_5\text{H}_3(\text{CH}(\text{Me})\text{P}(\text{O})\text{Cy}_2)(\text{PtBu}_2)-1,2]$ . To a solution of **13a** (88.0 mg, 0.200 mmol) in 3 mL MeOH, one drop of 30%  $\text{H}_2\text{O}_2$  was added at 0 °C and stirred for 1 h at room temperature. The product was partitioned between 30 mL  $\text{CHCl}_3$  and 10 mL  $\text{H}_2\text{O}$ . The phase was separated, and the organic layer was washed with brine (20 mL), dried over  $\text{MgSO}_4$  and evaporated *in vacuo* to give 90.0 mg (99%) **13b** as an orange powder.  $^1\text{H}$  NMR ( $\text{CDCl}_3$ )  $\delta$  4.99 (s, 1 H), 4.53 (q,  $J = 6.7$ , 1 H), 4.47-4.50 (m, 1 H), 4.22 (s, 5 H), 4.11-4.15 (m, 1 H), 2.51 (s, 3 H), 2.32 (s, 3 H), 1.86 (d,  $J = 6.8$  Hz, 3 H), 1.00-2.30 (m, 22 H from Cy);  $^{31}\text{P}$   $\{^1\text{H}\}$  NMR ( $\text{C}_6\text{D}_6$ )  $\delta$  49.29 (s).

A red solution of compound **13b** (90.0 mg, 0.200 mmol) and  $\text{HPtBu}_2$  (32.4 mg, 0.200 mmol) in 2.0 mL acetic acid was heated at 100 °C for 30 h. The solvent was removed under reduced pressure, and 1.0 mL of  $\text{Et}_3\text{N}$  and 10 mL of pentane was added. The red solution was filtered through a short plug of Celite, and the solvent was evaporated. Ligand **13** was recrystallized from 5 mL of degassed EtOH to give 82.2 mg (73%) of orange, microcrystalline product.  $^1\text{H}$  NMR ( $\text{C}_6\text{D}_6$ )  $\delta$  4.25 (s, 5 H), 4.13-4.16 (m, 1 H), 4.03-4.06 (m, 1 H), 3.99-4.02 (m, 1 H), 3.67 (dq,  $J = 22.4, 10.4$  Hz, 1 H), 2.84-2.94 (m, 1 H), 2.61-2.66 (m, 1 H), 2.37-2.50 (m, 1 H), 1.75 (dd,  $J = 7.6, 3.2$  Hz, 3 H), 1.44 (d,  $J = 10.4$  Hz, 9 H), 1.15 (d,  $J = 10.8$  Hz, 9 H), 1.20-2.03 (m, 19 H from  $\text{PCy}_2$ );  $^{31}\text{P}$   $\{^1\text{H}\}$  NMR ( $\text{C}_6\text{D}_6$ )  $\delta$  49.68 (s), 42.50 (s);  $^{13}\text{C}$  NMR ( $\text{C}_6\text{D}_6$ )  $\delta$  101.62 (dd,  $J = 22.9, 12.9$  Hz), 74.17 (dd,  $J = 93.1, 3.1$  Hz), 70.89 (d,  $J = 12.2$  Hz), 70.56, 70.38 (d,  $J = 8.3$  Hz), 68.34 (d,  $J = 10.0$  Hz), 42.83 (d,  $J = 64.8$  Hz), 42.39 (d,  $J = 21.42$  Hz), 41.72 (d,  $J = 21.32$  Hz), 34.18 (d,  $J = 33.6$  Hz), 33.32 (d,  $J = 29.8$  Hz), 32.14 (d,  $J = 14.5$  Hz), 31.75 (d,  $J = 13.7$  Hz), 30.11, 29.79 (d,  $J = 35.1$  Hz), 28.26 (d,  $J = 11.4$  Hz), 27.94 (d,  $J = 12.3$  Hz), 27.70 (d,  $J = 3.1$  Hz), 27.58, 27.34, 27.21, 27.04, 26.78, 26.66 (d,  $J = 1.5$  Hz).

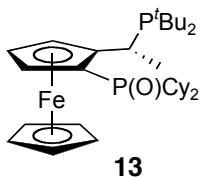

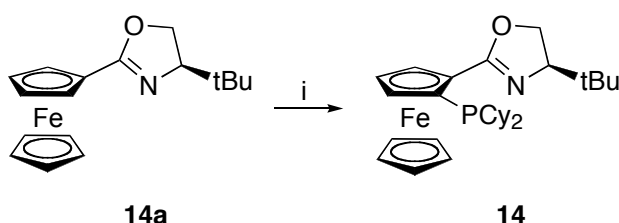

*Reagents and conditions:* Compound **14a** was prepared according to the reported procedure. i. *n*BuLi, THF, room temperature, 2 h, ClPCy<sub>2</sub>, overnight, RT.

**Preparation of Ligand 14.** A 2.5 M solution of *n*BuLi (80  $\mu$ L, 0.20 mmol) was added dropwise to the solution of **14a** (62.2 mg, 0.200 mmol) in 1.0 mL of Et<sub>2</sub>O at room temperature. The resulting mixture was stirred for 2 h at room temperature. A solution of ClPCy<sub>2</sub> (46.5 mg, 0.200 mmol) in 2.0 mL of Et<sub>2</sub>O was added through syringe. The mixture was stirred overnight. Aqueous saturated NaHCO<sub>3</sub> (10 mL) was slowly added with cooling in an ice bath. The resulting organic layer and Et<sub>2</sub>O extracts from the aqueous layer were combined, washed with 2  $\times$  20 mL of water, dried over MgSO<sub>4</sub>, and concentrated to afford an organic powder. The crude product was purified by flash chromatography (hexane/ethyl acetate, 95/5) to give 89.3 mg (88%) of the product as an orange solid. <sup>1</sup>H NMR (C<sub>6</sub>D<sub>6</sub>)  $\delta$  4.95-5.01 (m, 1 H), 4.15 (s, 5 H), 4.13-4.14 (m, 2 H), 3.86-3.94 (m, 2 H), 3.77 (dd, *J* = 9.5, 8.0 Hz, 1 H), 2.58-2.61 (m, 1 H), 1.00-2.00 (m, 21 H), 0.95 (s, 9 H); <sup>31</sup>P {<sup>1</sup>H} NMR (C<sub>6</sub>D<sub>6</sub>)  $\delta$  -10.14 (s). <sup>13</sup>C NMR (C<sub>6</sub>D<sub>6</sub>)  $\delta$  165.12 (d, *J* = 1.5 Hz), 80.82 (d, *J* = 32.2 Hz), 76.88, 75.23 (d, *J* = 15.5 Hz), 72.23, 72.19, 71.26 (d, *J* = 17.5 Hz), 71.20, 70.34, 68.00, 37.86 (d, *J* = 19.2 Hz), 33.92 (d, *J* = 16.0 Hz), 33.72, 32.48 (d, *J* = 19.7 Hz), 31.02 (d, *J* = 12.8 Hz), 30.40 (d, *J* = 13.1 Hz), 29.88 (d, *J* = 9.4 Hz), 28.55 (d, *J* = 9.7 Hz), 28.32 (d, *J* = 8.4 Hz), 27.56 (d, *J* = 10.8 Hz), 27.42 (d, *J* = 9.7 Hz), 26.97 (d, *J* = 8.7 Hz), 26.25. Anal. Calcd. For C<sub>29</sub>H<sub>42</sub>FeNOP: C, 68.64; H, 8.34. Found: C, 68.55; H, 8.13.

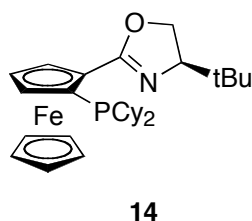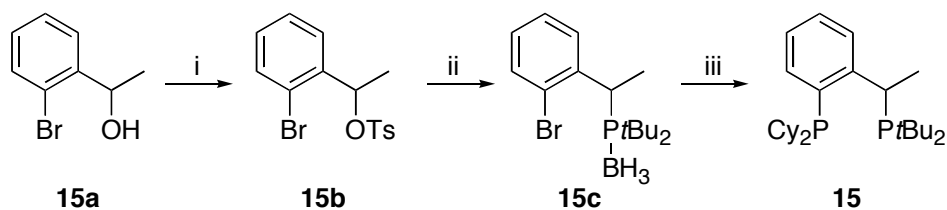

*Reagents and conditions:* i. a) NaH, Et<sub>2</sub>O, reflux, 5 h; b) TsCl, 0 °C, 1 h; ii. a) LiPtBu<sub>2</sub>·BH<sub>3</sub>, -78 °C  $\rightarrow$  reflux, 10 h; iii. a) *t*BuLi, THF, -78 °C, 35 min, ClPCy<sub>2</sub>, overnight, RT; b) Morpholine, 100 °C, 1 h.

**Preparation of Ligand 15.** A solution of 2-bromo- $\alpha$ -methylbenzyl alcohol **15a** (0.400 g, 2.00 mmol) in 2.0 mL of Et<sub>2</sub>O was added dropwise to a suspension of NaH (50.0 mg, 2.00 mmol) in 3.0 mL of Et<sub>2</sub>O in a schlenk's tube under nitrogen atmosphere. The resulting mixture was stirred for 30 min at room temperature and heated to reflux for 5 h. The mixture was cooled to 0 °C and tosyl chloride (1.9

mmol) in 5.0 mL Et<sub>2</sub>O was added dropwise. The mixture was stirred for another hour at 0 °C. The mixture was filtered through a short-pass funnel with Celite. The solvent was evaporated under reduced pressure. Recrystallization from Et<sub>2</sub>O/hexane at -10 °C gave 675 mg (95%) of compound **15b** as white crystals. <sup>1</sup>H NMR (CDCl<sub>3</sub>) δ 7.65 (d, *J* = 8.5 Hz, 2 H), 7.34 (ddd, *J* = 8.0, 5.5, 1.0 Hz, 2 H), 7.14-7.18 (m, 3 H), 7.03 (td, *J* = 8.0, 1.5 Hz, 1 H), 5.89 (t, *J* = 6.5 Hz, 1 H), 2.32 (s, 3 H), 1.50 (d, *J* = 6.5 Hz, 3 H); <sup>13</sup>C NMR (CDCl<sub>3</sub>) δ 144.49, 139.16, 133.44, 132.32, 129.47, 129.36, 127.72, 127.66, 127.35, 120.82, 79.09, 22.80, 21.40. Anal. Calcd. For C<sub>15</sub>H<sub>15</sub>BrO<sub>3</sub>S: C, 50.71; H, 4.26. Found: C, 50.67; H, 4.23.

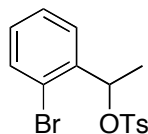**15b**

A 1.0 M solution of *n*BuLi (0.4 mL, 1.0 mmol) was added dropwise to a solution of HP*t*Bu<sub>2</sub>•BH<sub>3</sub> (0.160 g, 1.00 mmol) in 2.0 mL of THF at -78°C. The resulting mixture was stirred for 0.5 h at -78°C and 0.5 h at room temperature. The resulting solution was then added to a solution of **15b** (0.354 g, 1.00 mmol) in 3.0 mL of THF at -78°C. The mixture was stirred for 0.5 h at room temperature and heated to reflux for 10 h. White precipitate was formed during this time. After cooling to room temperature, the mixture was filtered through a short-pass funnel containing Celite. The solvent was evaporated under reduced pressure. The residue was purified by flash chromatography (hexane/ethyl acetate, 99/1) to give 295.3 mg (92%) of **15c** as a white solid. <sup>1</sup>H NMR (CDCl<sub>3</sub>) δ 7.85 (d, *J* = 8.4 Hz, 1 H), 7.43 (d, *J* = 8.0 Hz, 1 H), 7.18-7.22 (m, 1 H), 6.97-7.01 (m, 1 H), 4.06 (dq, *J* = 14.4, 7.2 Hz, 1 H), 1.52 (dd, *J* = 13.2, 7.2 Hz, 3 H), 1.37 (d, *J* = 12.0 Hz, 9 H), 1.01 (d, *J* = 12.0 Hz, 9 H), 0.10-1.00 (m, 3 H); <sup>13</sup>C NMR (CDCl<sub>3</sub>) δ 142.80, 132.67 (d, *J* = 2.7 Hz), 131.82 (d, *J* = 2.2 Hz), 128.33 (d, *J* = 1.5 Hz), 127.58 (d, *J* = 1.7 Hz), 124.03 (d, *J* = 6.2 Hz), 34.49 (d, *J* = 23.6 Hz), 34.17 (d, *J* = 24.5 Hz), 31.98 (d, *J* = 22.5 Hz), 29.22, 29.14, 22.55 (d, *J* = 1.3 Hz). <sup>31</sup>P {<sup>1</sup>H} NMR (CDCl<sub>3</sub>) δ 58.5 (m).

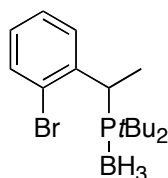**15c**

A 1.5 M solution of *t*BuLi (0.54 mL, 0.81 mmol) was added dropwise to the solution of **15c** (0.278 g, 0.810 mmol) in 2.0 mL of THF at -78°C. The resulting mixture was stirred for 1 h at -78°C. To this yellow solution, ClPCy<sub>2</sub> (0.189 g, 0.900 mmol) was added. The resulting mixture was stirred at -78°C for 2 h and then heated to 60 °C for 5 h. The solution was cooled to room temperature, and 3.0 mL of BH<sub>3</sub>•THF (1.0 M) was added. The resulting solution was stirred for 10 min, and 5.0 mL of MeOH was added slowly with cooling in an ice bath to quench the excess BH<sub>3</sub>. The solvent was removed under reduced pressure, and the residue was purified by flash chromatography (hexane/ethyl acetate, 90/00) to give 203.3 mg (53%) of **15**•BH<sub>3</sub> as a white solid. <sup>1</sup>H NMR (CDCl<sub>3</sub>) δ 8.22 (dd, *J* = 7.6, 4.4 Hz, 1 H), 7.45 (t, *J* = 8.0 Hz, 1 H), 7.38 (t, *J* = 8.0 Hz, 1 H), 7.23 (t, *J* = 7.6 Hz, 1 H), 4.89 (dq, *J* = 14.4, 6.8 Hz, 1 H), 2.18-2.30 (m, 1 H), 1.71-1.98 (m, 9 H), 1.58 (dd, *J* = 13.2, 7.2 Hz, 3 H), 1.40-1.60 (m, 3 H), 1.41 (d, *J* = 12.0 Hz, 9 H), 1.00-1.26 (m, 9 H), 1.00 (d, *J* = 12.0 Hz, 9 H), 0.00-1.00 (m, 6 H); <sup>31</sup>P {<sup>1</sup>H} NMR (CDCl<sub>3</sub>) δ 24.79 (m), 58.75 (m).

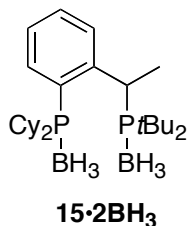

A colorless solution of **15**·2BH<sub>3</sub> (100.0 mg, 0.224 mmol) in 1.0 mL of morpholine was heated at 100 °C for 1 h. The solvent was evaporated, and 5.0 mL of hexane was added. The solution was filtered through a short plug of Celite, and the solvent was evaporated under reduced pressure. Recrystallization of the residue from 3.0 mL of degassed EtOH yielded 85.0 mg (85%) of ligand **15** as white crystals. <sup>1</sup>H NMR (C<sub>6</sub>D<sub>6</sub>) δ 7.60-7.64 (m, 1 H), 7.07 (d, *J* = 8.0 Hz, 1 H), 6.86-6.88 (m, 1 H), 6.71 (td, *J* = 7.5, 1.5 Hz, 1 H), 4.47-4.55 (m, 1 H), 1.68-1.78 (m, 3 H), 1.37-1.49 (m, 6 H), 1.32 (dd, *J* = 8.5, 7.0 Hz, 3 H), 1.17-1.26 (m, 2 H), 1.03 (d, *J* = 10.0 Hz, 9 H), 1.00-1.26 (m, 9 H), 0.80-1.00 (m, 2 H), 0.89 (d, *J* = 10.0 Hz, 9 H); <sup>13</sup>C NMR (C<sub>6</sub>D<sub>6</sub>) δ 156.07 (dd, *J* = 24.9, 9.2 Hz), 133.25 (d, *J* = 17.5 Hz), 133.12 (d, *J* = 2.8 Hz), 130.38 (dd, *J* = 14.7, 4.6 Hz), 128.74, 124.99 (d, *J* = 1.8 Hz), 36.16 (d, *J* = 15.6 Hz), 32.61-32.09 (4 C), 31.97 (dd, *J* = 11.9, 2.6 Hz), 31.83 (d, *J* = 12.9 Hz), 31.40 (d, *J* = 15.7 Hz), 30.99 (d, *J* = 13.8 Hz), 30.71 (d, *J* = 17.5 Hz), 29.59 (d, *J* = 6.5 Hz), 27.77 (d, *J* = 11.9 Hz), 27.68 (d, *J* = 6.4 Hz), 27.52 (d, *J* = 10.2 Hz), 27.34 (d, *J* = 11.1 Hz), 26.64 (d, *J* = 26.77 Hz), 24.81 (d, *J* = 12.8 Hz), 10.5. <sup>31</sup>P {<sup>1</sup>H} NMR (CDCl<sub>3</sub>) δ -16.98 (s), 53.59 (s). Anal. Calcd. For C<sub>28</sub>H<sub>48</sub>P<sub>2</sub>: C, 75.30; H, 10.83. Found: C, 74.87; H, 11.27.

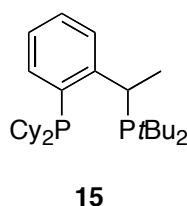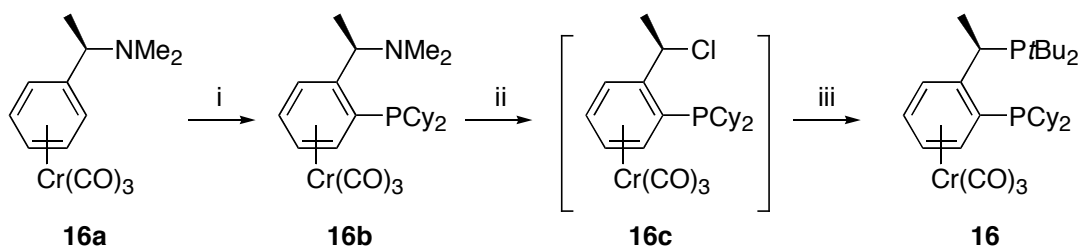

*Reagents and conditions:* i. *t*BuLi, THF, -78 °C, 1 h, ClPCy<sub>2</sub>, overnight, RT; ii. 1-Chloroethyl chloroformate, THF, -40 °C → room temperature, overnight; iii. a) HP*t*Bu<sub>2</sub>, TlPF<sub>6</sub>, acetone, room temperature, overnight; b) Et<sub>3</sub>N, room temperature, 15 min.

**Preparation of Ligand 16.** A 1.5 M solution of *t*BuLi (0.73 mL, 1.00 mmol) was added dropwise to the solution of **16a** (0.285 g, 1.00 mmol) in 2.0 mL of THF at -78 °C. The resulting mixture was stirred for 1 h at -78 °C. To this yellow solution, ClPCy<sub>2</sub> (0.210 g, 1.00 mmol) was added. The resulting mixture was stirred at -78 °C for 2 h and then room temperature overnight. Aqueous saturated NaHCO<sub>3</sub> (10 mL) was slowly added with cooling in an ice bath. The resulting organic layer and Et<sub>2</sub>O extracts from the aqueous layer were combined, washed with 2 × 20 mL of water, dried over MgSO<sub>4</sub>, and concentrated to afford a yellow powder. Compound **16b** was purified by flash chromatography (hexane/diethyl ether, 80/20) to give 0.397 g (80%) of the product **16b** as a yellow solid. <sup>1</sup>H NMR (C<sub>6</sub>D<sub>6</sub>) δ 5.03 (d, *J* = 5.5 Hz, 1 H), 4.63 (t, *J* = 6.0 Hz, 1 H), 4.41-4.48 (m, 3 H), 2.52-2.55 (m, 1 H),

1.93 (s, 6 H), 1.36-1.87 (m, 14 H), 1.01-1.25 (m, 7 H), 0.83 (d,  $J = 7.0$  Hz, 3 H);  $^{31}\text{P}\{^1\text{H}\}$  NMR ( $\text{C}_6\text{D}_6$ )  $\delta$  -6.52 ppm.

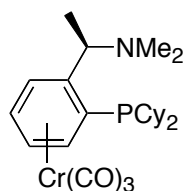

**16b**

1-Chloroethyl chloroformate (0.143 g, 1.00 mmol) was added dropwise to a stirring solution of **16b** (0.100 g, 0.250 mmol) in 5.0 mL of THF at  $-40^\circ\text{C}$ . The solution was warmed to room temperature and kept stirring overnight. The solvent was evaporated and the residue was dissolved in 5.0 mL of  $\text{Et}_2\text{O}$ . The solution was filtered through a short pad of Celite, and the solvent was evaporated under reduced pressure to give a yellow solid. Attempts at purification by flash chromatography resulted in decomposition. The crude material was used without further purification.

$\text{HP}t\text{Bu}_2$  (36.6 mg, 0.250 mmol) was added to the solution of the crude product dissolved in 5.0 mL of dry acetone. To this solution was added dropwise a suspension of  $\text{TIPF}_6$  (88.0 mg, 0.250 mmol) in 1.0 mL of dry acetone. A fine white formed immediately. The solution was stirred at room temperature overnight.  $\text{NEt}_3$  (0.5 mL) was added, and the solution was further stirred for 15 min and then filtered through a short plug of Celite. The solvent and excess  $\text{NEt}_3$  were evaporated under reduced pressure. The residue was purified by flash chromatography (hexane/ $\text{Et}_2\text{O}$ , 95/5) to give 104.5 mg (70%) of ligand **16** as a yellow solid.  $^1\text{H}$  NMR ( $\text{C}_6\text{D}_6$ )  $\delta$  5.12 (d,  $J = 6.5$  Hz, 1 H), 4.67-4.71 (m, 2 H), 4.35 (td,  $J = 6.0, 2.0$  Hz, 1 H), 4.12 (quintet,  $J = 6.5$  Hz, 1 H), 1.53 (dd,  $J = 7.5, 2.5$  Hz, 3 H), 1.1-2.5 (m, 22 H), 1.30 (d,  $J = 11.0$  Hz, 9 H), 1.02 (d,  $J = 11.0$  Hz, 9 H);  $^{31}\text{P}\{^1\text{H}\}$  NMR ( $\text{C}_6\text{D}_6$ )  $\delta$  50.23 (d,  $J = 52.67$  Hz), -13.66 (d,  $J = 52.67$  Hz) ppm.  $^{13}\text{C}$  NMR ( $\text{C}_6\text{D}_6$ )  $\delta$  233.79, 125.62 (dd,  $J = 20.5, 16.5$  Hz), 107.57 (d,  $J = 38.5$  Hz), 98.18 (d,  $J = 2.1$  Hz), 94.18, 90.40 (t,  $J = 5.5$  Hz), 89.03, 38.30 (dd,  $J = 13.8, 9.6$  Hz), 36.46 (dd,  $J = 19.2, 4.5$  Hz), 35.25 (d,  $J = 16.7$  Hz), 35.14 (d,  $J = 33.1$  Hz), 34.93 (d,  $J = 16.9$  Hz), 34.63 (d,  $J = 32.1$  Hz), 33.11 (d,  $J = 23.5$  Hz), 32.55 (dd,  $J = 15.6, 7.3$  Hz), 32.42 (d,  $J = 13.5$  Hz), 31.74 (dd,  $J = 12.5, 2.9$  Hz), 30.03 (d,  $J = 12.2$  Hz), 28.81 (d,  $J = 9.3$  Hz), 28.68 (d,  $J = 12.8$  Hz), 28.01 (d,  $J = 7.3$  Hz), 27.45 (d,  $J = 6.9$  Hz), 27.41 (d,  $J = 13.7$  Hz), 26.89, 26.72 (d,  $J = 1.6$  Hz). Anal. Calcd. For  $\text{C}_{32}\text{H}_{51}\text{CrO}_3\text{P}_2$ : C, 64.30; H, 8.60. Found: C, 63.87; H, 9.05.

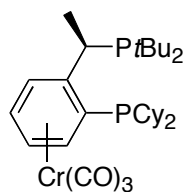

**16**

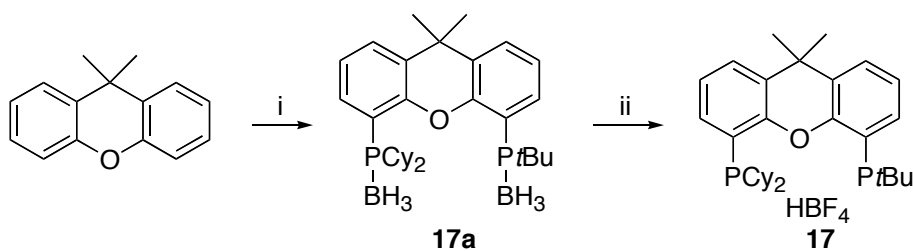



*Reagents and conditions:* i. a) BuLi/TMEDA, Et<sub>2</sub>O, -78 °C→room temperature for 16 h; b) ClP*t*Bu<sub>2</sub>, -78 °C→room temperature, 16 h; c) BuLi/TMEDA, Et<sub>2</sub>O, -78 °C→room temperature for 16 h; d) ClPCy<sub>2</sub>, -78 °C→room temperature, 16 h; e) BH<sub>3</sub>/THF, room temperature, 10 min; ii. a) TMEDA, reflux, 10 h; b) HBF<sub>4</sub>/CH<sub>2</sub>Cl<sub>2</sub>, room temperature, 30 min.

**Preparation of Ligand 17.** A solution (1.40 M) of *sec*-Butyllithium (1.50 mL, 2.10 mmol) was added dropwise to a mixture of Xanthene (0.420 g, 2.0 mmol) and TMEDA (0.244 g, 2.10 mmol) in Et<sub>2</sub>O (5.0 mL). The resulting mixture was stirred for 16 h at room temperature. The mixture was cooled to -78 °C, and di-*tert*-butyl-chlorophosphine (0.361g, 2.00 mmol) in 5.0 mL Et<sub>2</sub>O was added dropwise. The mixture was stirred for 16 h at room temperature before it was cooled to -78 °C. TMEDA (0.244 g, 2.10 mmol) was added, followed by a solution (1.40 M) of *sec*-butyllithium (1.50 mL, 2.10 mmol). The resulting mixture was stirred for 16 h at room temperature. The mixture was cooled to -78 °C and di-cyclohexyl-chlorophosphine (0.465 g, 2.00 mmol) in 5.0 mL Et<sub>2</sub>O was added dropwise. The mixture was stirred for 16 h at room temperature. BH<sub>3</sub> in THF (30.0 mL, 1.0 M) was added, and the mixture was stirred for another 2 h at room temperature. The excess BH<sub>3</sub> was quenched by methanol. The solvent was evaporated under reduced pressure, and the residue was purified by flash chromatography (hexane/ethyl acetate, 90/10) to give a white solid. The white solid was further purified by recrystallization from ethyl acetate to give **17a** (300.9 mg, 26%) as colorless crystals. <sup>1</sup>H NMR (CDCl<sub>3</sub>) δ 7.91 (ddd, *J* = 13.2, 7.2, 1.2 Hz, 1 H), 7.63 (dt, *J* = 7.6, 1.6 Hz, 1 H), 7.54 (d, *J* = 7.2 Hz, 1 H), 7.46 (dd, *J* = 7.6, 1.6 Hz 1H), 7.10-7.14 (m, 2 H), 3.60-3.64 (m, 2 H), 2.13 (d, *J* = 11.6 Hz, 2 H), 1.73-1.82 (m, 4 H), 1.57 (s, 6 H), 1.26 (d, *J* = 12.0 Hz, 18 H), 1.10-1.62 (m, 14 H), 0.01-1.00 (m, 6 H); <sup>31</sup>P {<sup>1</sup>H} NMR (CDCl<sub>3</sub>) δ 38.4 (br), 10.54 (br).

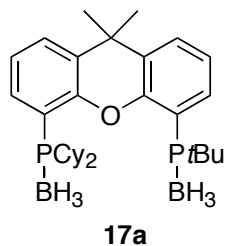

A colorless solution of **17a** (100.0 mg, 0.173 mmol) in 10.0 mL of TMEDA was heated at 110°C for 5 h. The solvent was removed, and 5.0 mL of hexane was added. The solution was filtered through a short plug of Celite, and the solvent was evaporated under reduced pressure. The residue was dissolved in 3.0 mL of CH<sub>2</sub>Cl<sub>2</sub>, and aqueous HBF<sub>4</sub> (43% w/w, 0.2 mL) was added. After vigorously stirring for 10 min, the organic layer was separated and dried over MgSO<sub>4</sub>. Filtration, followed by removal of the solvent and recrystallization of the residue from CH<sub>2</sub>Cl<sub>2</sub> by the addition of pentane afforded the product as colorless crystals. <sup>1</sup>H NMR (CD<sub>2</sub>Cl<sub>2</sub>) δ 8.48 (dd, *J* = 478.3, 7.2 Hz, 1 H), 7.91 (d, *J* = 8.0 Hz, 1 H), 7.65 (t, *J* = 8.4 Hz, 1 H), 7.48-7.54 (m, 2 H), 7.38 (d, *J* = 7.6 Hz, 1 H), 7.27 (t, *J* = 7.6 Hz, 1 H), 2.06 (t, *J* = 7.2 Hz, 2 H), 1.95 (d, *J* = 7.5 Hz, 2 H), 1.79 (d, *J* = 12.8 Hz, 2 H), 1.65 (s, 6 H), 1.57 (d, *J* = 13.2 Hz, 18 H), 1.50-1.70 (m, 5 H), 0.95-1.42 (m, 11 H); <sup>31</sup>P {<sup>1</sup>H} NMR (CD<sub>2</sub>Cl<sub>2</sub>) δ 22.0 (d, *J* = 89.0 Hz), -16.55 (d, *J* = 89.0 Hz). <sup>13</sup>C NMR (CD<sub>2</sub>Cl<sub>2</sub>) δ 154.60 (d, *J* = 3.0 Hz), 154.30 (d, *J* = 18.4 Hz), 134.76 (d, *J* = 4.5 Hz), 133.14, 132.41 (d, *J* = 3.0 Hz), 131.37, 130.73 (d, *J* = 5.3 Hz), 126.95, 125.63 (d, *J* = 11.4 Hz), 124.94, 122.19 (d, *J* = 19.1 Hz), 103.52 (d, *J* = 70.4 Hz), 35.81, 35.13 (d, *J* = 33.5 Hz), 33.24 (d, *J* = 9.9 Hz), 30.98 (d, *J* = 16.0 Hz), 30.01, 29.53 (d, *J* = 6.8 Hz), 27.93, 27.29 (d, *J* = 13.0 Hz), 27.11 (d, *J* = 8.3 Hz), 26.53.

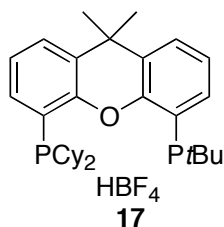

## References:

1. Wagaw, S.; Buchwald, S. L. *J. Org. Chem.* **1996**, *61*, 7240-7241.
2. Wolfe, J. P.; Tomori, H.; Sadighi, J. P.; Yin, J.; Buchwald, S. L. *J. Org. Chem.* **2000**, *65*, 1158-1174.
3. Morris, J.; Wishka, D. J. *J. Org. Chem.* **1995**, *60*, 2642 - 2644.
4. Noveron, J. C.; Lah, M. S.; Del Sesto, R. E.; Arif, A. M.; Miller, J. S.; Stang, P. J. *J. Am. Chem. Soc.* **2002**, *124*, 6613-6625.
5. Zhang, Z.; Mao, J.; Zhu, D.; Wu, F.; Chen, H.; Wan, B. *Tetrahedron*, **2006**, *62*, 4435.
6. Ma, D. W.; Cai, Q.; Zhang, H. *Org. Lett.* **2003**, *5*, 2453 – 2455.
7. Brown, D. S.; Elliott, M. C.; Moody, C. J.; Mowlem, T. J.; Marino, J. P. Jr; Padwa, A. *J. Org. Chem.* **1994**, *59*, 2447-2455.
8. Urgaonkar, S.; Nagarajum, M.; Verkade, J. G. *Org. Lett.* **2003**, *5*, 815-818.
9. Grail, G. F.; Renenbaum, L. E.; Tolstouhrov, A. V.; Duca, C. J.; Reinhard, J. F.; Anderson, F. E.; Scudi, J. V. *J. Am. Chem. Soc.* **1952**, *74*, 1313.
10. Cho, C. S.; Kim, H. S.; Kim, T. J.; Shim, S. C. *Synth. Commun.* **2001**, *31*, 3791.
11. Urgaonkar, S.; Verkade, J. G. *J. Org. Chem.* **2004**, *69*, 9135.
12. Clark, V. M.; Cox, A.; Herbert, E. J. *J. Chem. Soc.* **1968**, 831-833.
13. Zhou, C.; Wang, Y.; Li, D.; Zhou, L.; Liu, P.; Shi, Q. *Eur. J. Inorg. Chem.* **2006**, 2437-2446.
14. Tundel, R. E.; Anderson, K. W.; Buchwald, S. L. *J. Org. Chem.* **2006**, *71*, 430-433.
15. Dai, Q.; Gao, W.; Liu, D.; Kapes, L. M.; Zhang, X. *J. Org. Chem.* **2006**, *71*, 3928-3934.
16. Grasa, G. A.; Viciu, M. S.; Huang, J.; Nolan, S. P. *J. Org. Chem.* **2001**, *66*, 7729-7737.
17. Zhang, H.; Cai, Q.; Ma, D. *J. Org. Chem.* **2005**, *70*, 5164-5173.
18. Xu, C.; Gong, J.; Wu, Y. *Tetrahedron Lett.* **2007**, *48*, 1619-1623.
19. Xie, X.; Zhang, T. Y.; Zhang, Z. *J. Org. Chem.* **2006**, *71*, 6522-6529.
20. Noriyasu, K.; Quinetta, S.; Stambuli, J. P.; Hartwig, J. F. *J. Org. Chem.* **2002**, *67*, 5553-5566.
21. Ryoichi, H.; Masahiro, K.; Tetsutaro, K.; Kiyoshi, T.; Fumio, Y. *J. Heterocyclic Chem.* **1989**, *26*, 1255-1259.

**Table 1, entry 6, N-Cyclohexyl-2-aminopyridine**

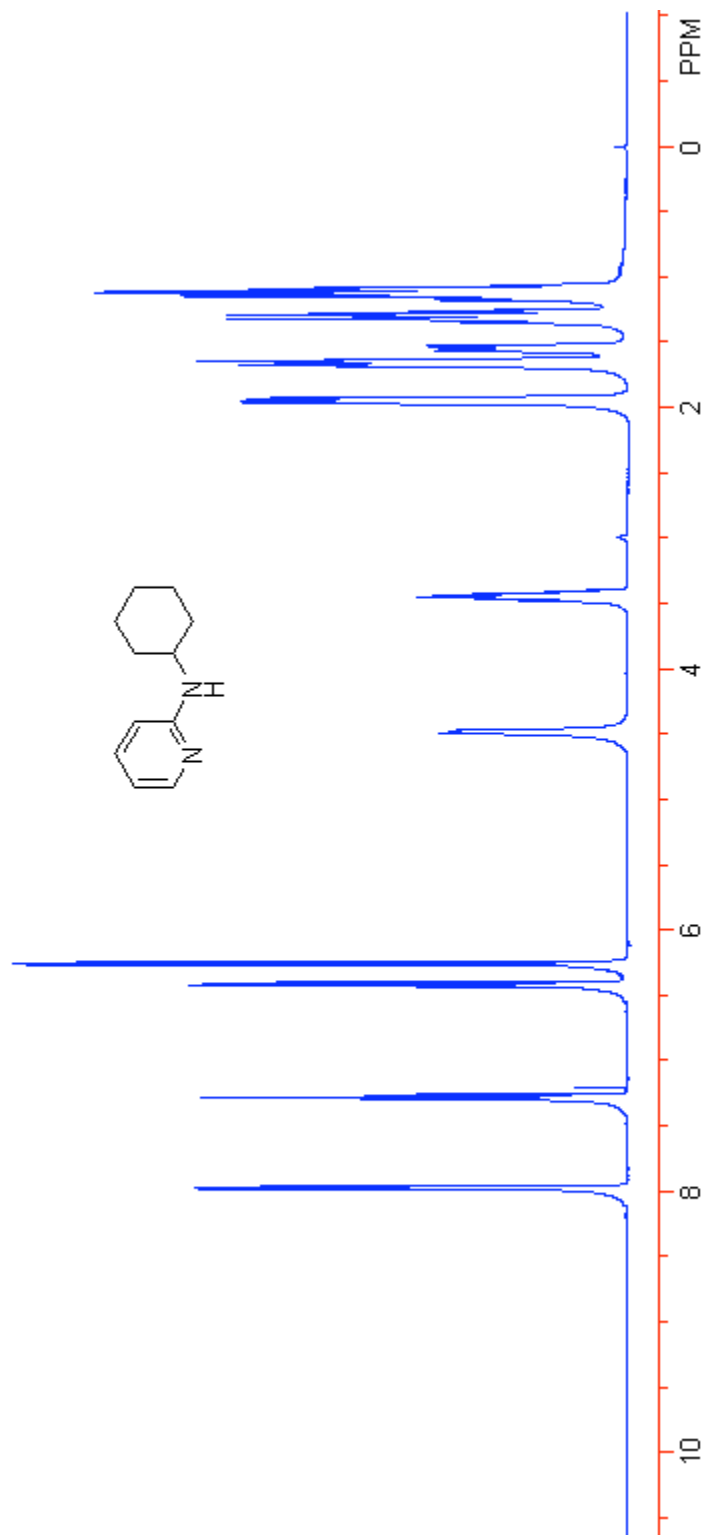

Table 1, entry 6, *N*-Cyclohexyl-2-aminopyridine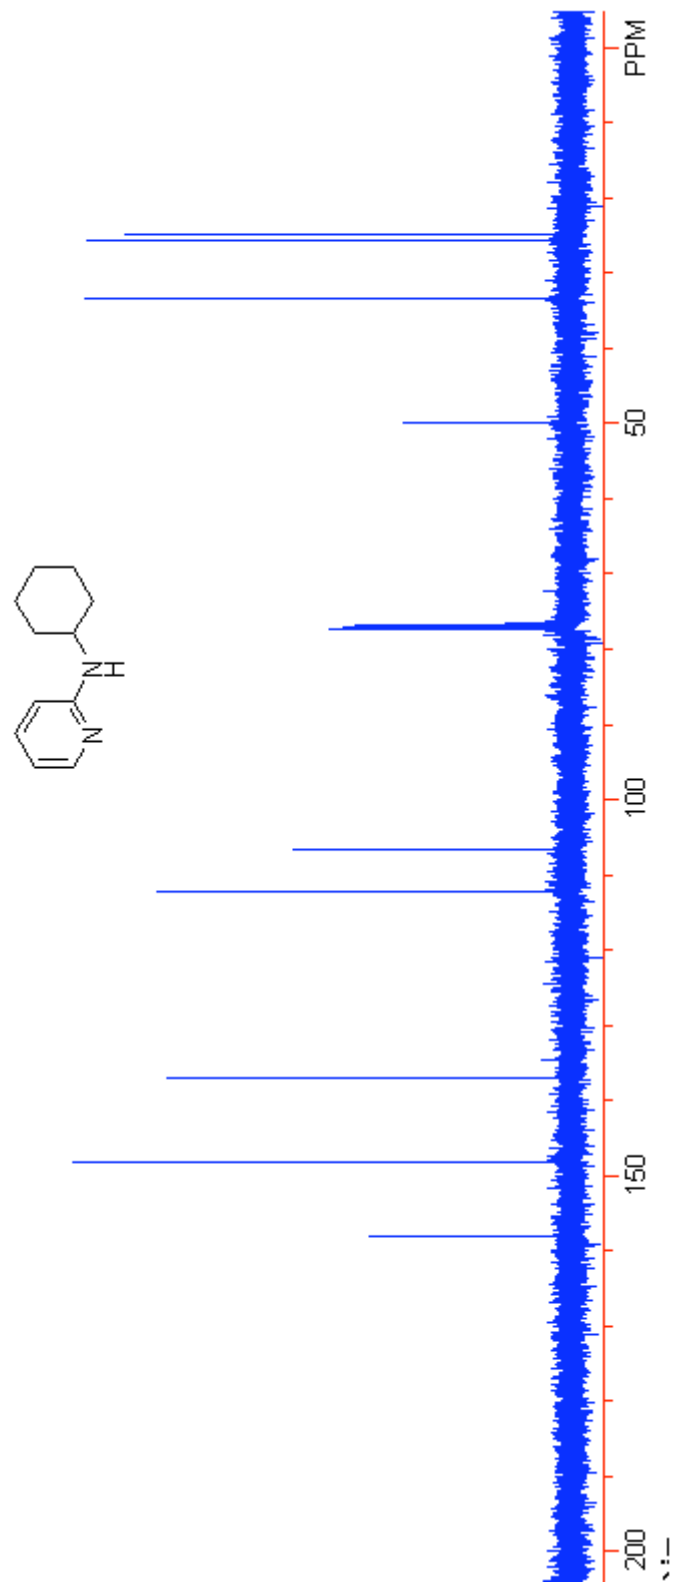



Table 1, entry 14, N-Benzyl-3-aminopyridine

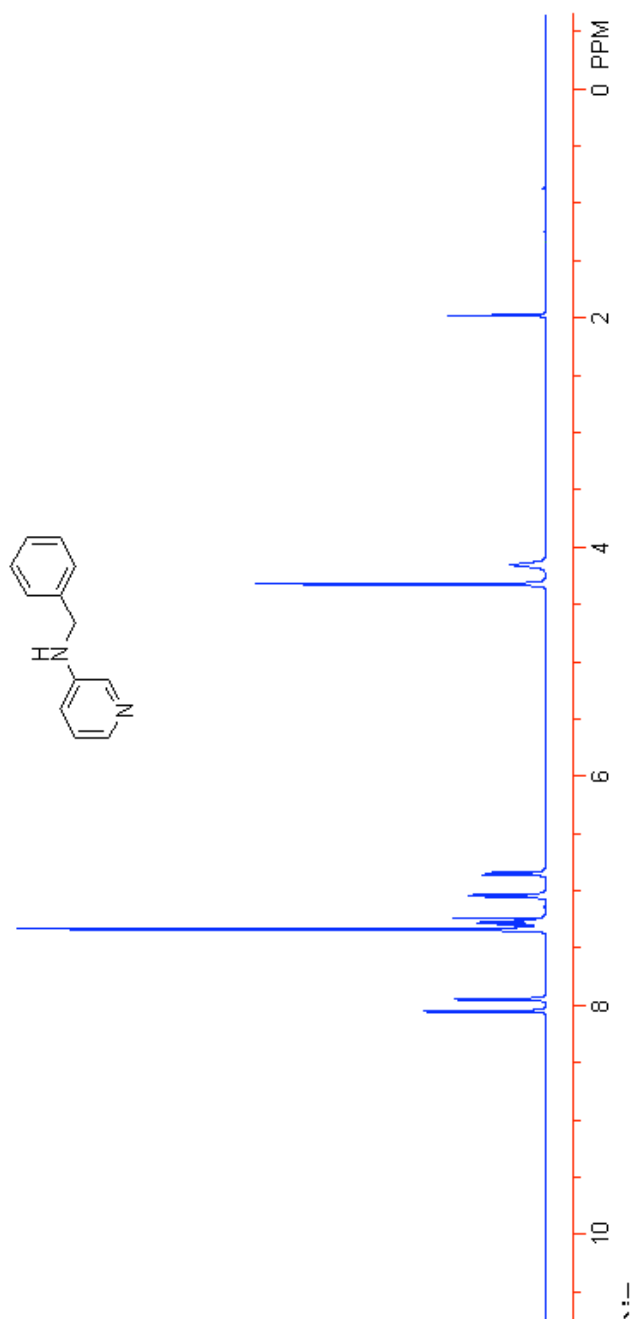

Table 1, entry 14, *N*-Benzyl-3-aminopyridine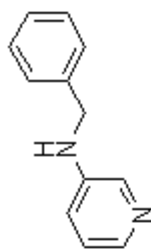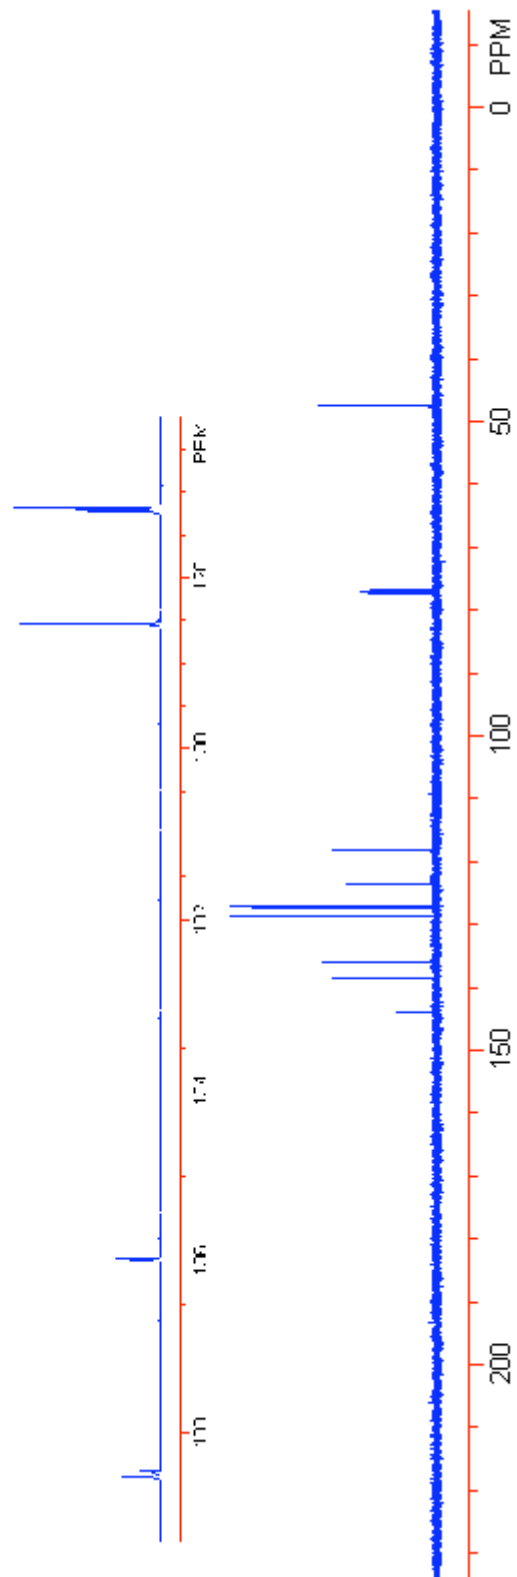

Table 1, entry 18, N-Cyclohexyl-3-aminopyridine

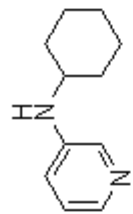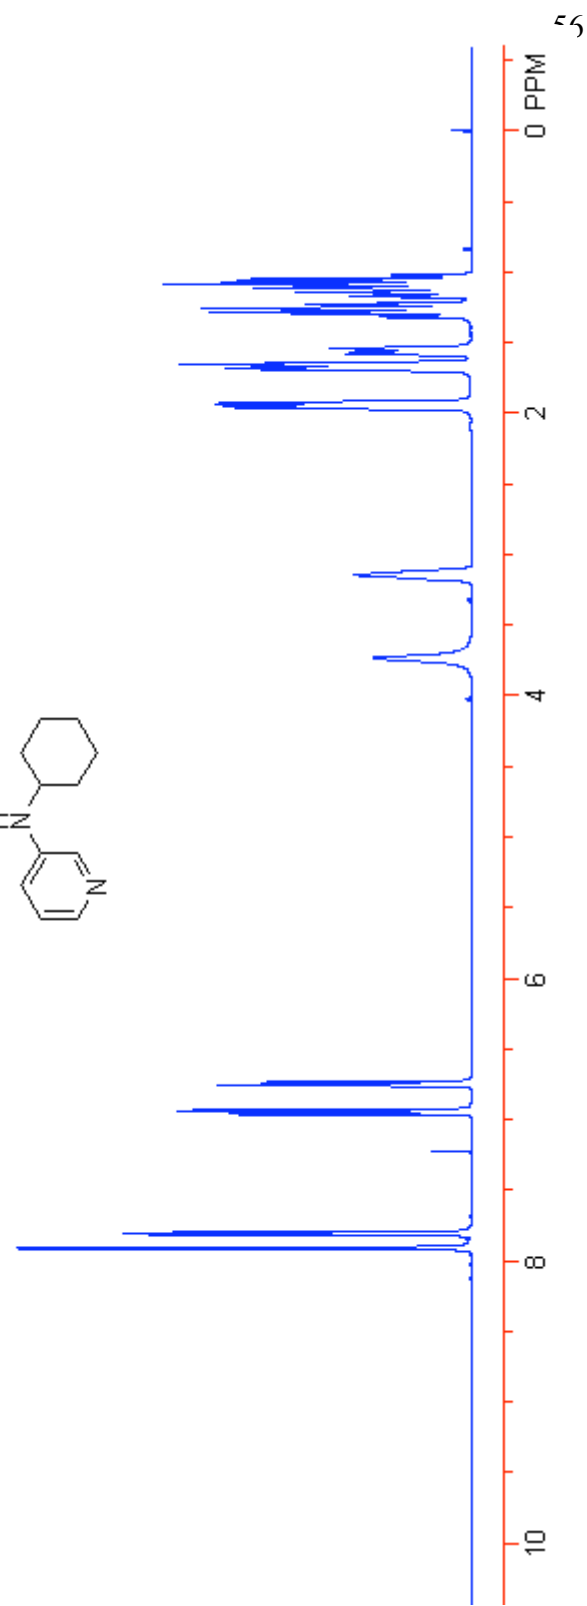



**Table 1, entry 18, *N*-Cyclohexyl-3-aminopyridine**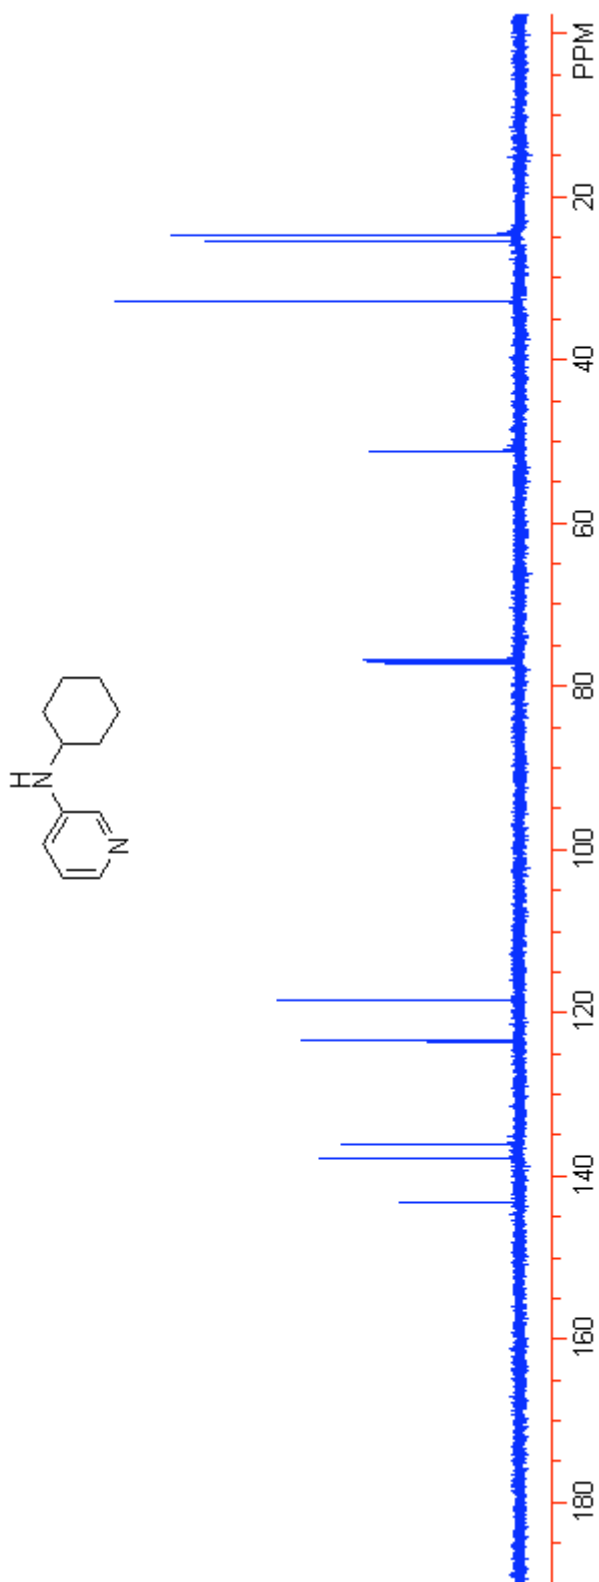



Table 1, entry 20, *N-tert-butyl-3-aminopyridine*

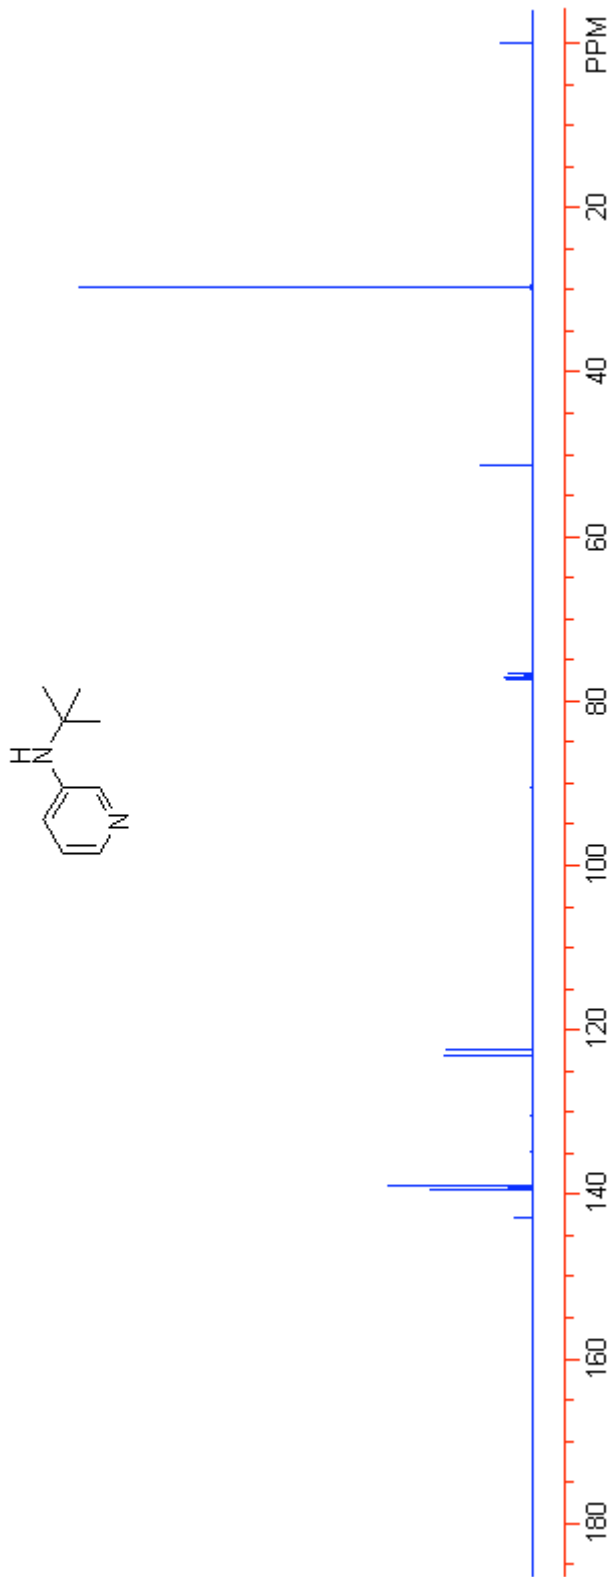

Table 1, entry 25, 4-benzamidopyridine

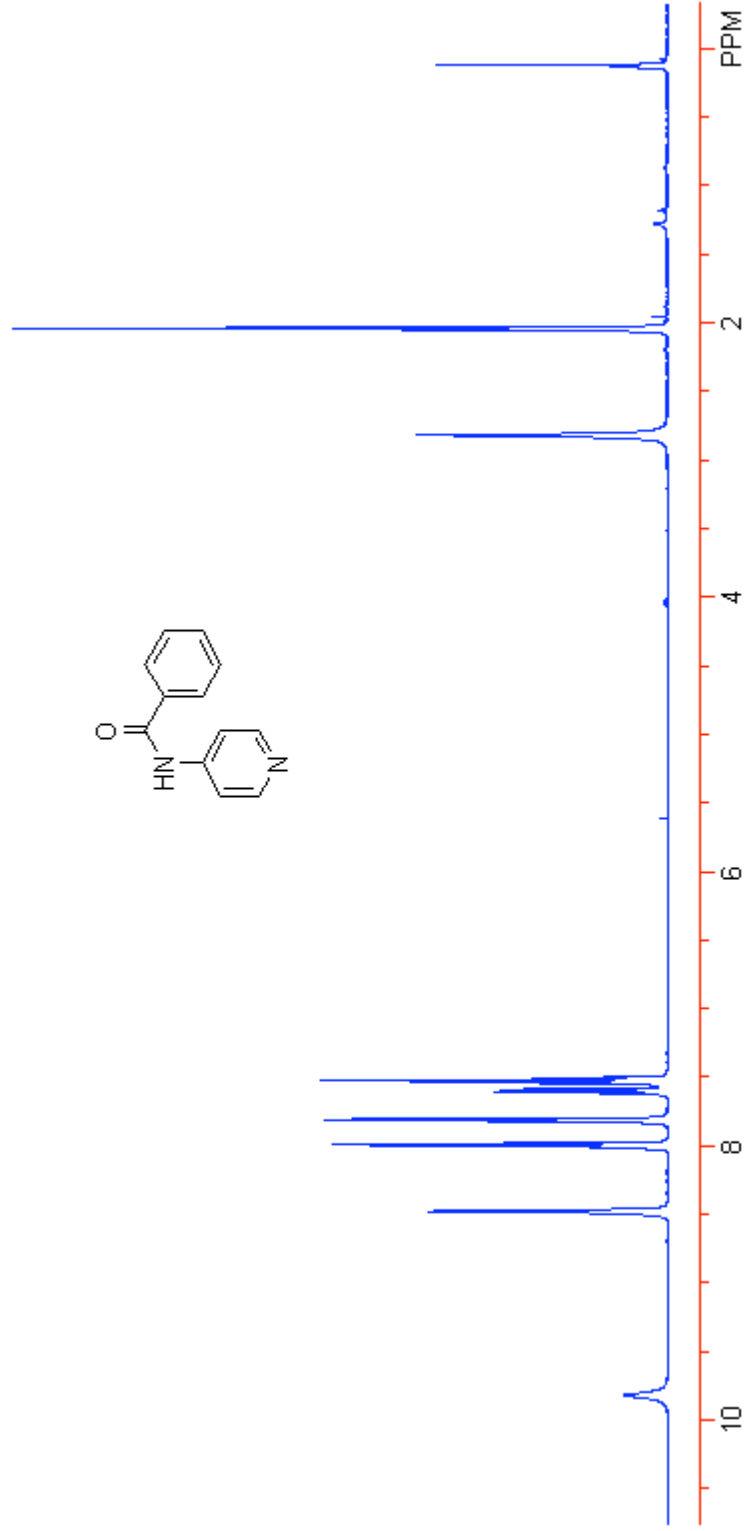

Table 1, entry 25, 4-benzamidopyridine

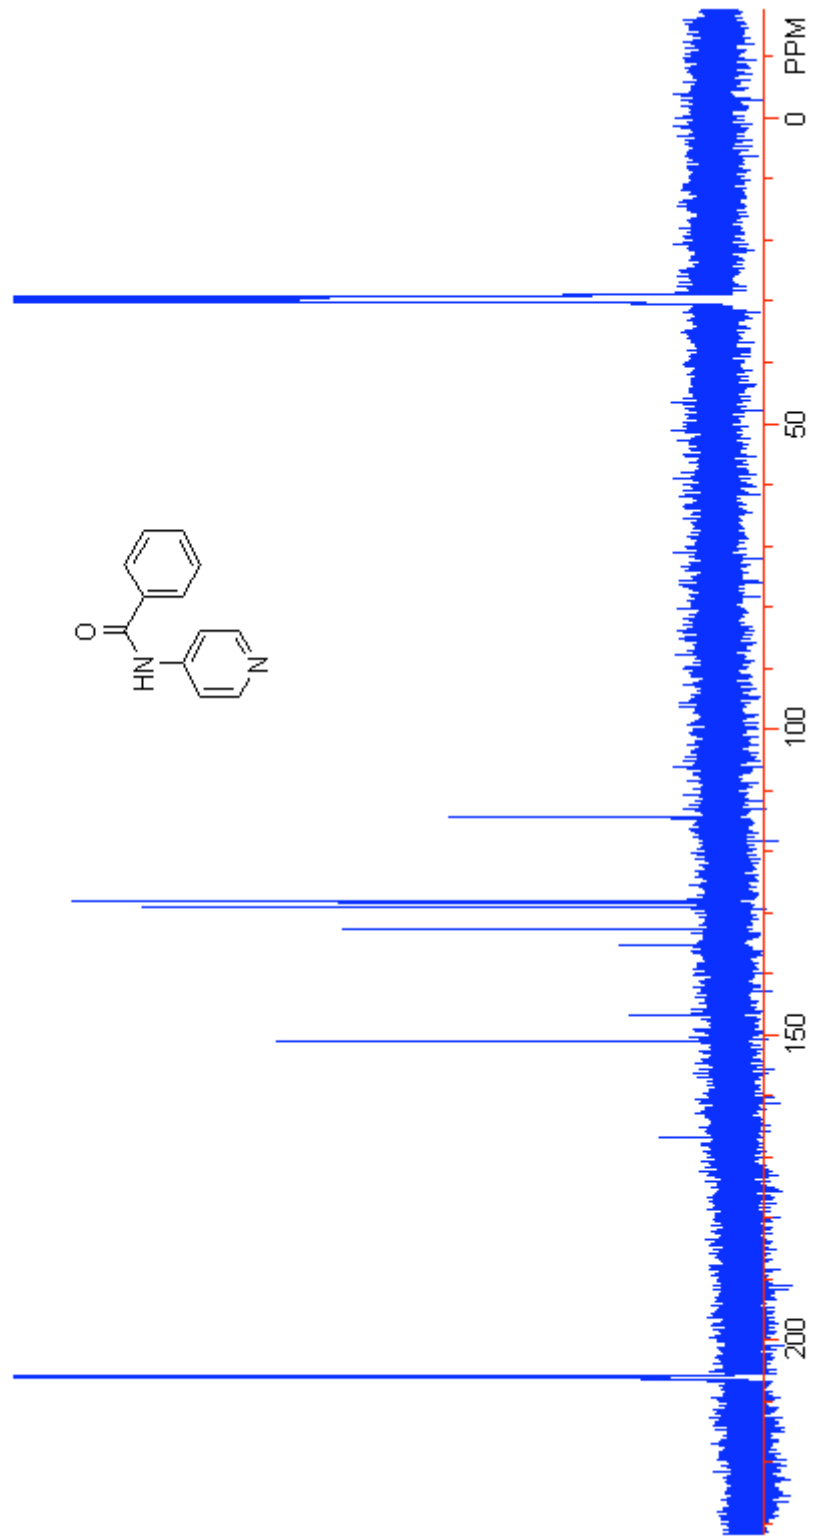

Table 1, entry 28, 5-(Cyclohexylamino)pyrimidine

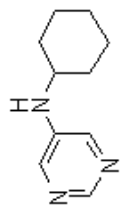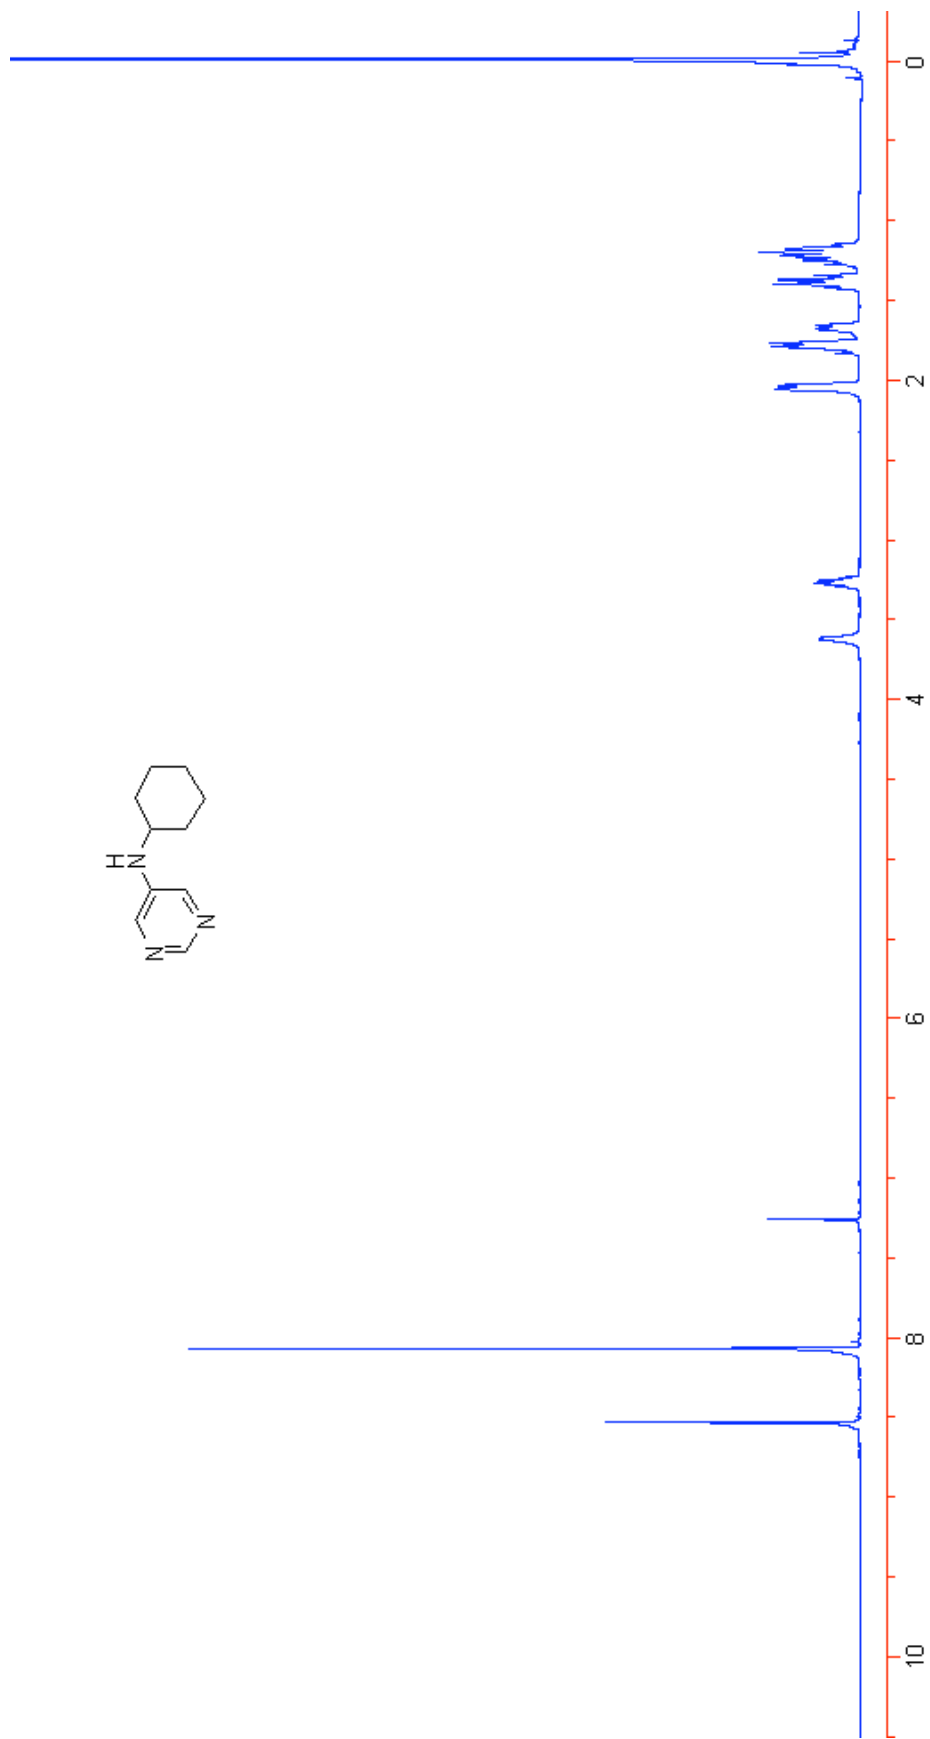

Table 1, entry 28, 5-(Cyclohexylamino)pyrimidine

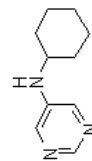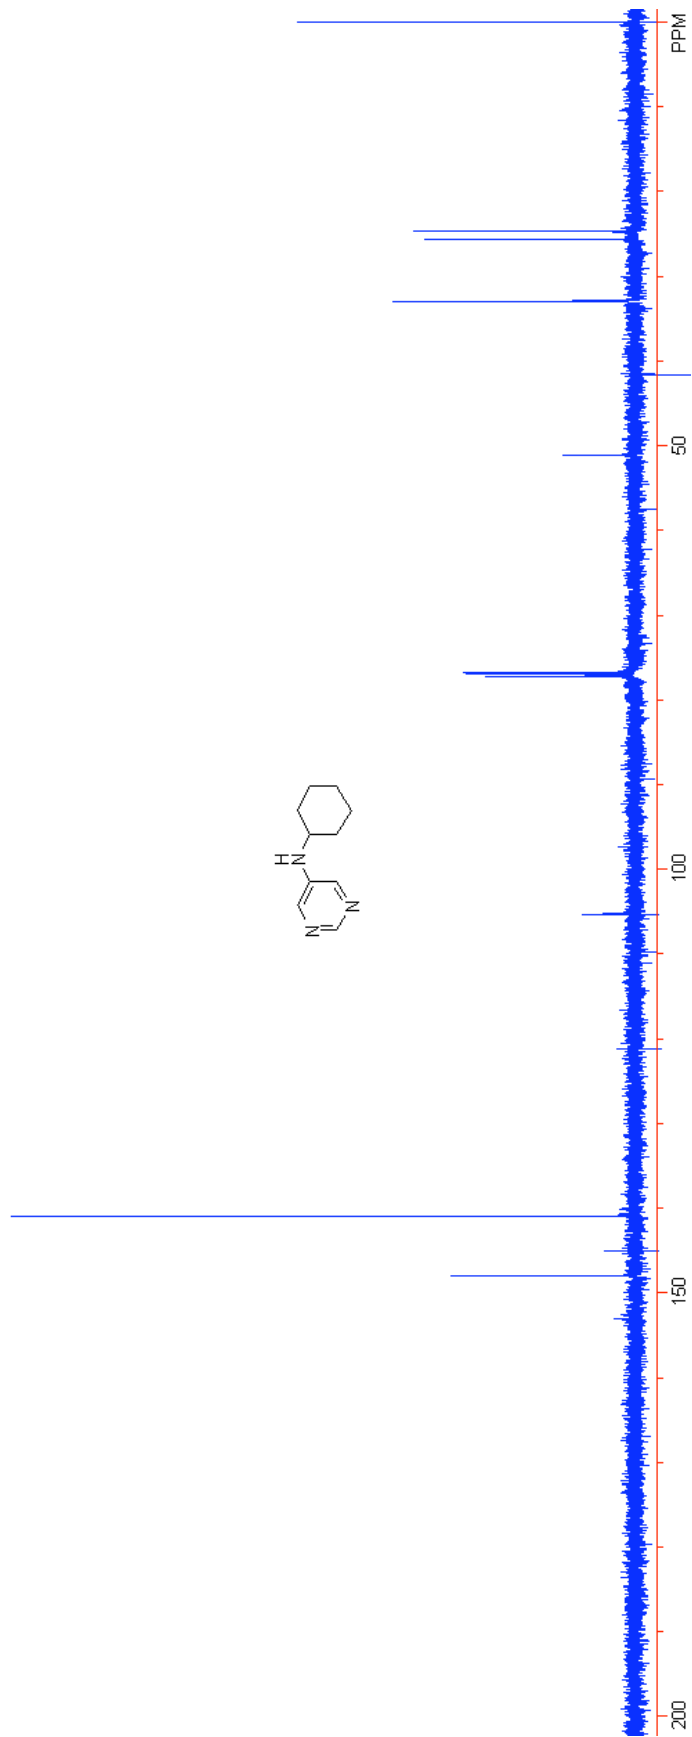

Table 3, entry 1, *N*-(Phenyl)-cyclohexylamine

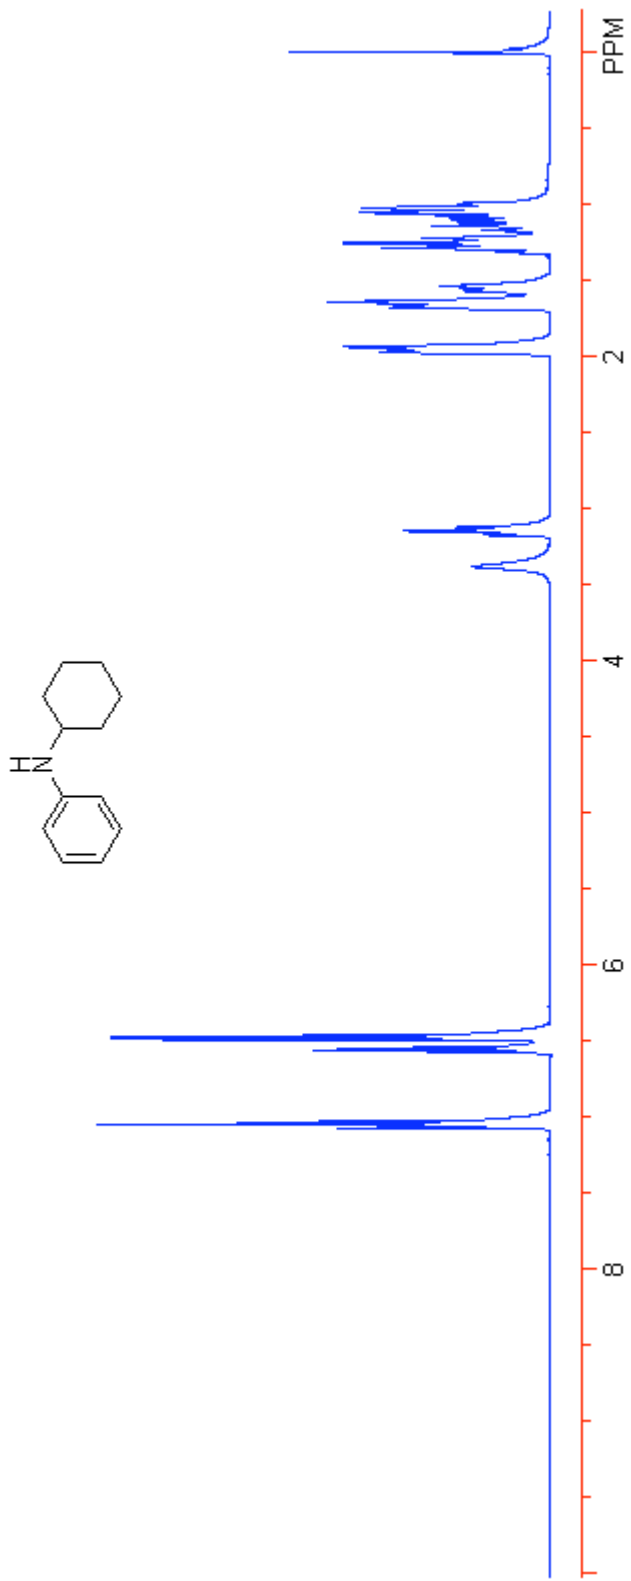



Table 3, entry 1, *N*-(Phenyl)-cyclohexylamine

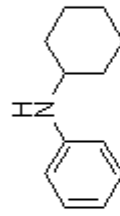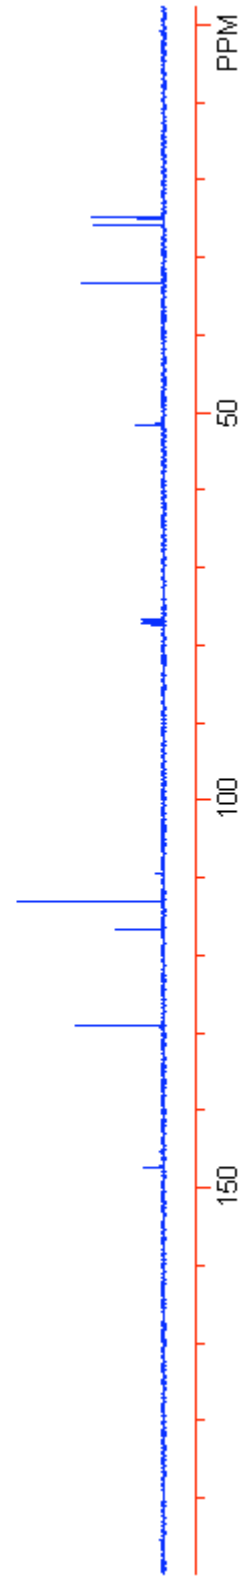



Table 3, entry 3, *N*-(Phenyl)-benzylamine

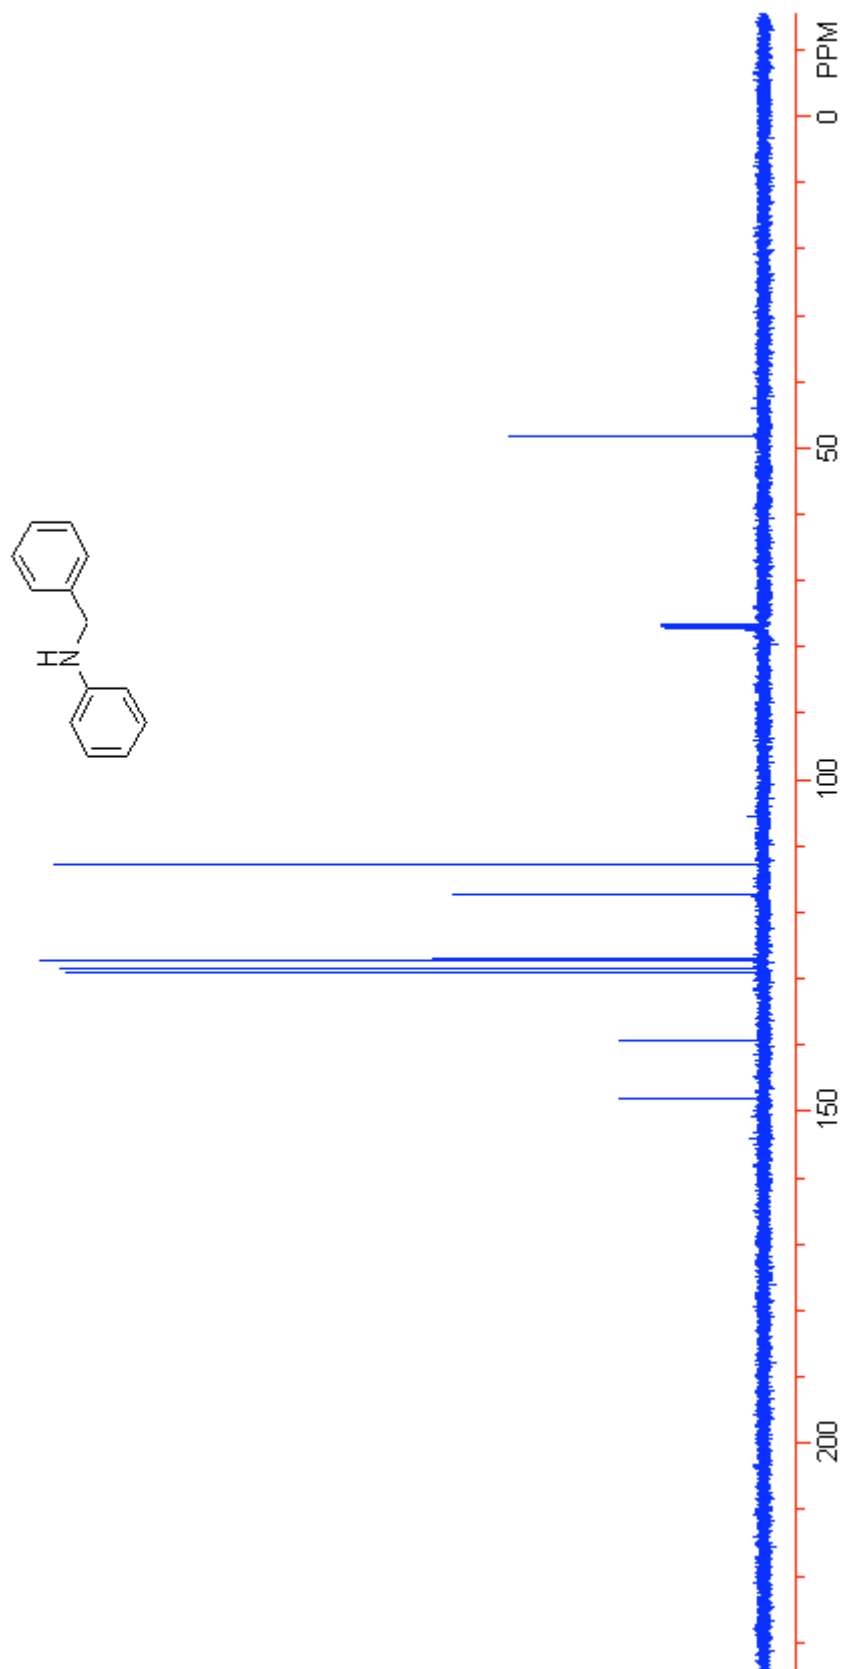

Table 3, entry 9, *N*-(*p*-Tolyl)-*iso*-butylamine

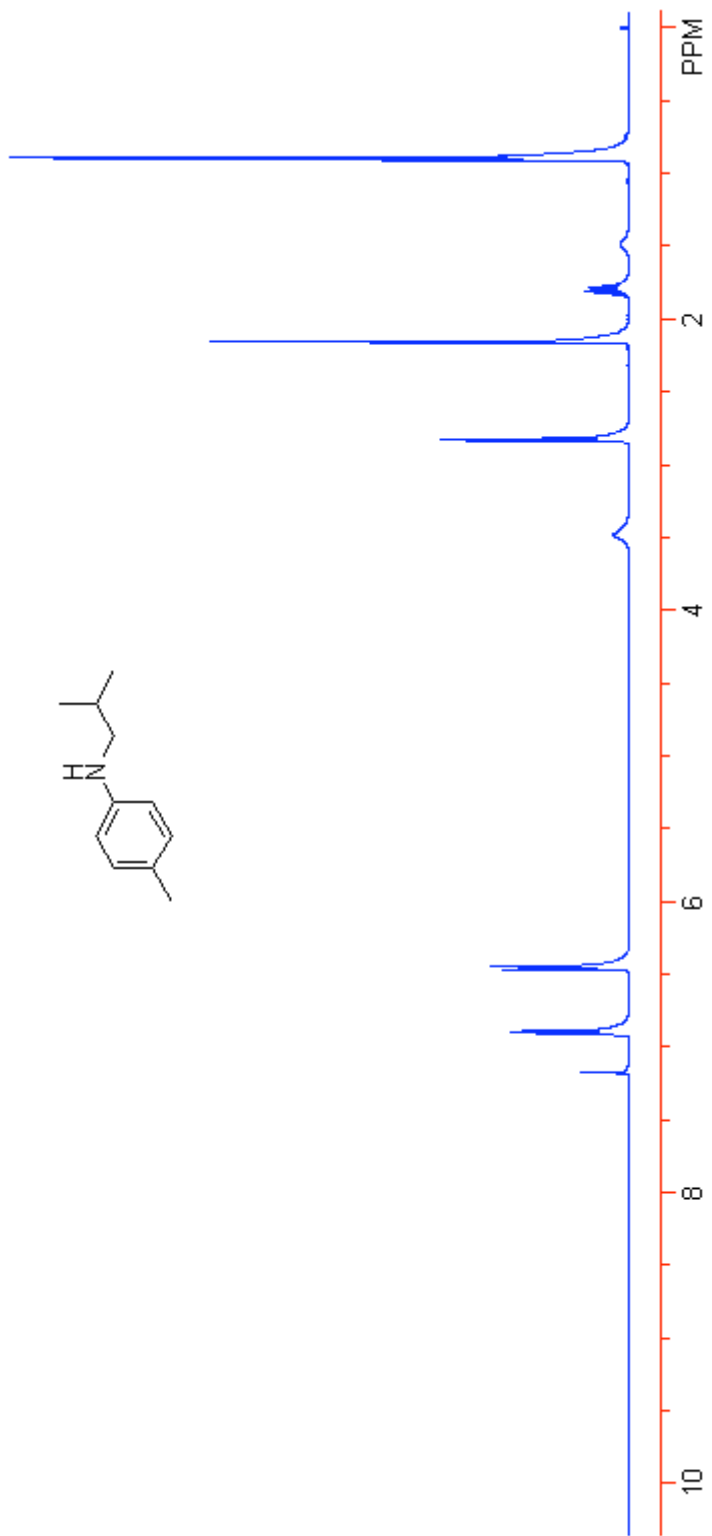

Table 3, entry 9, *N*-(*p*-Tolyl)-*iso*-butylamine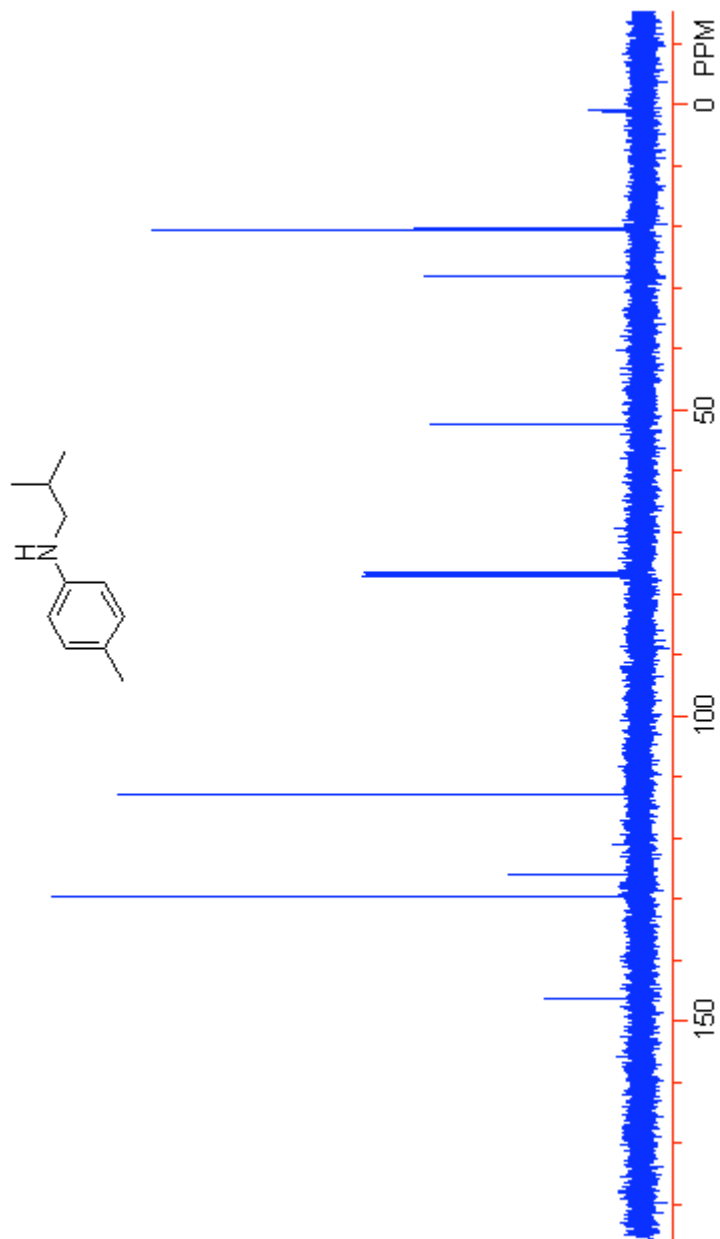

Table 3, entry 21, *N*-(Cyclohexylamino)-*m*-anisidine

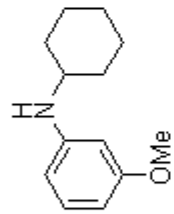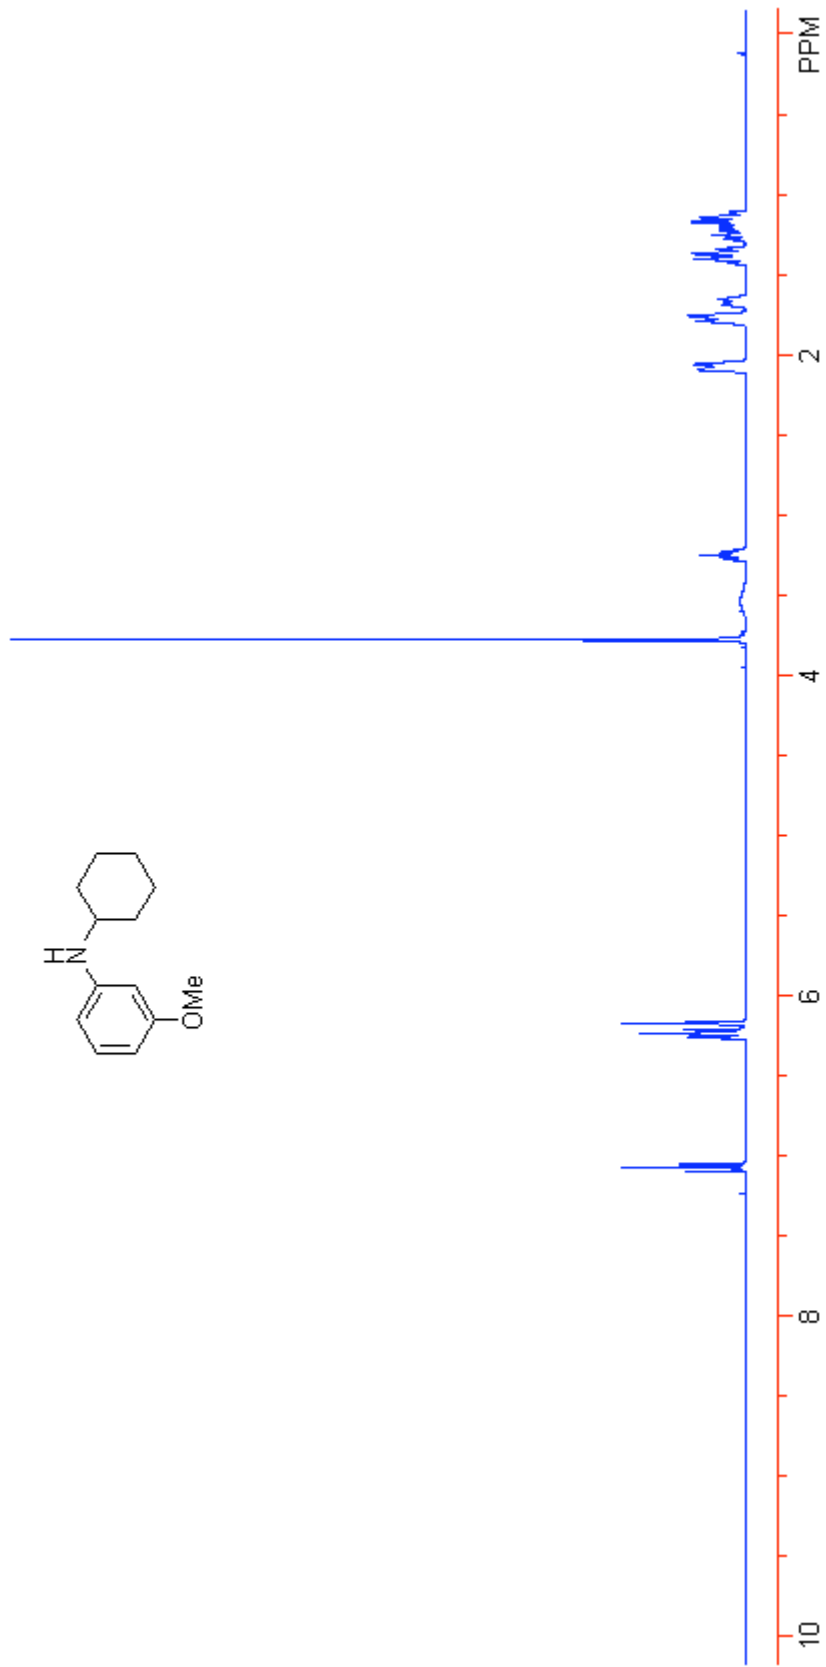

Table 3, entry 21, *N*-(Cyclohexylamino)-*m*-anisidine

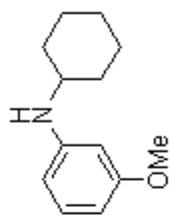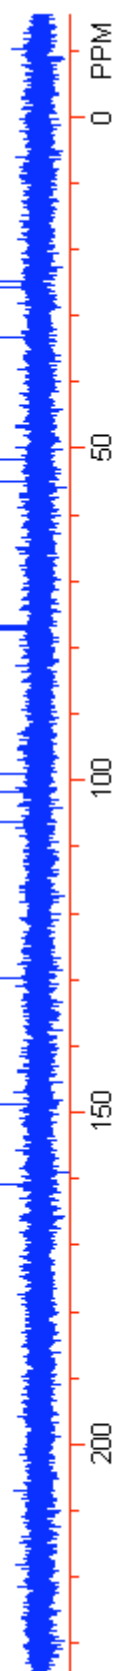

Table 3, entry 23, *N*-octyl-1-quinonaphthylene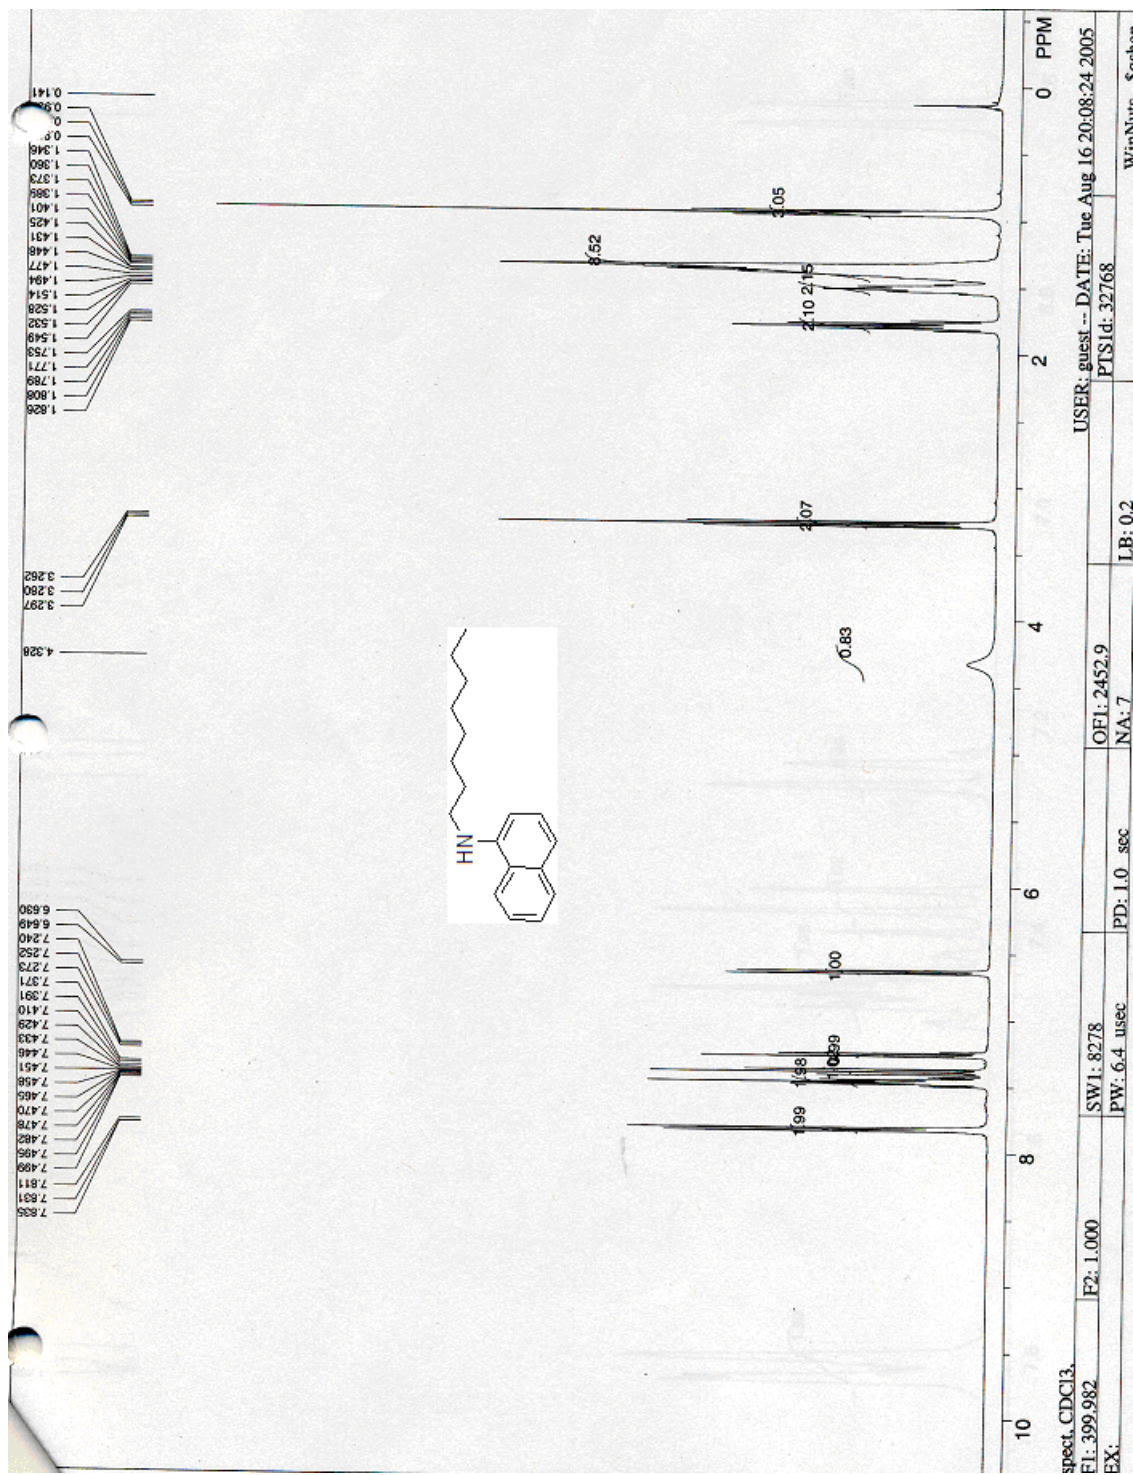



Table 3, entry 23, N-octyl-1-quinonaphthalene

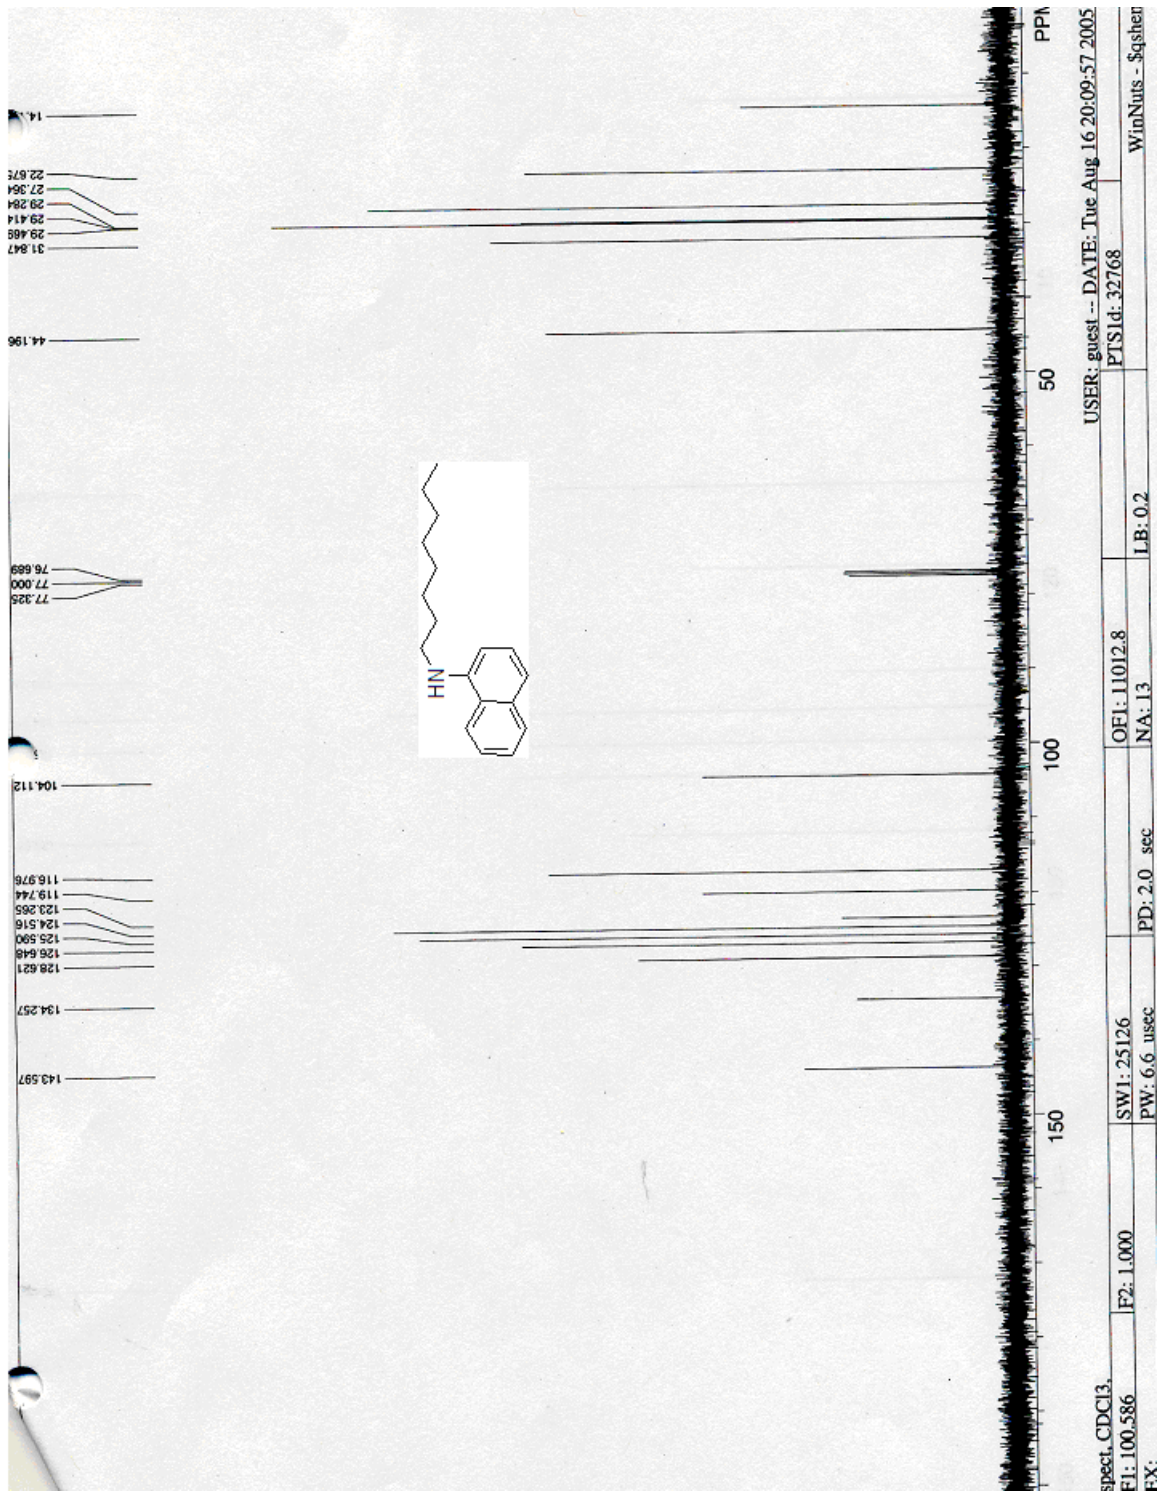

**Table 3, entry 24, *N*-(*isobutyl*)-2-*isopropyl*aniline**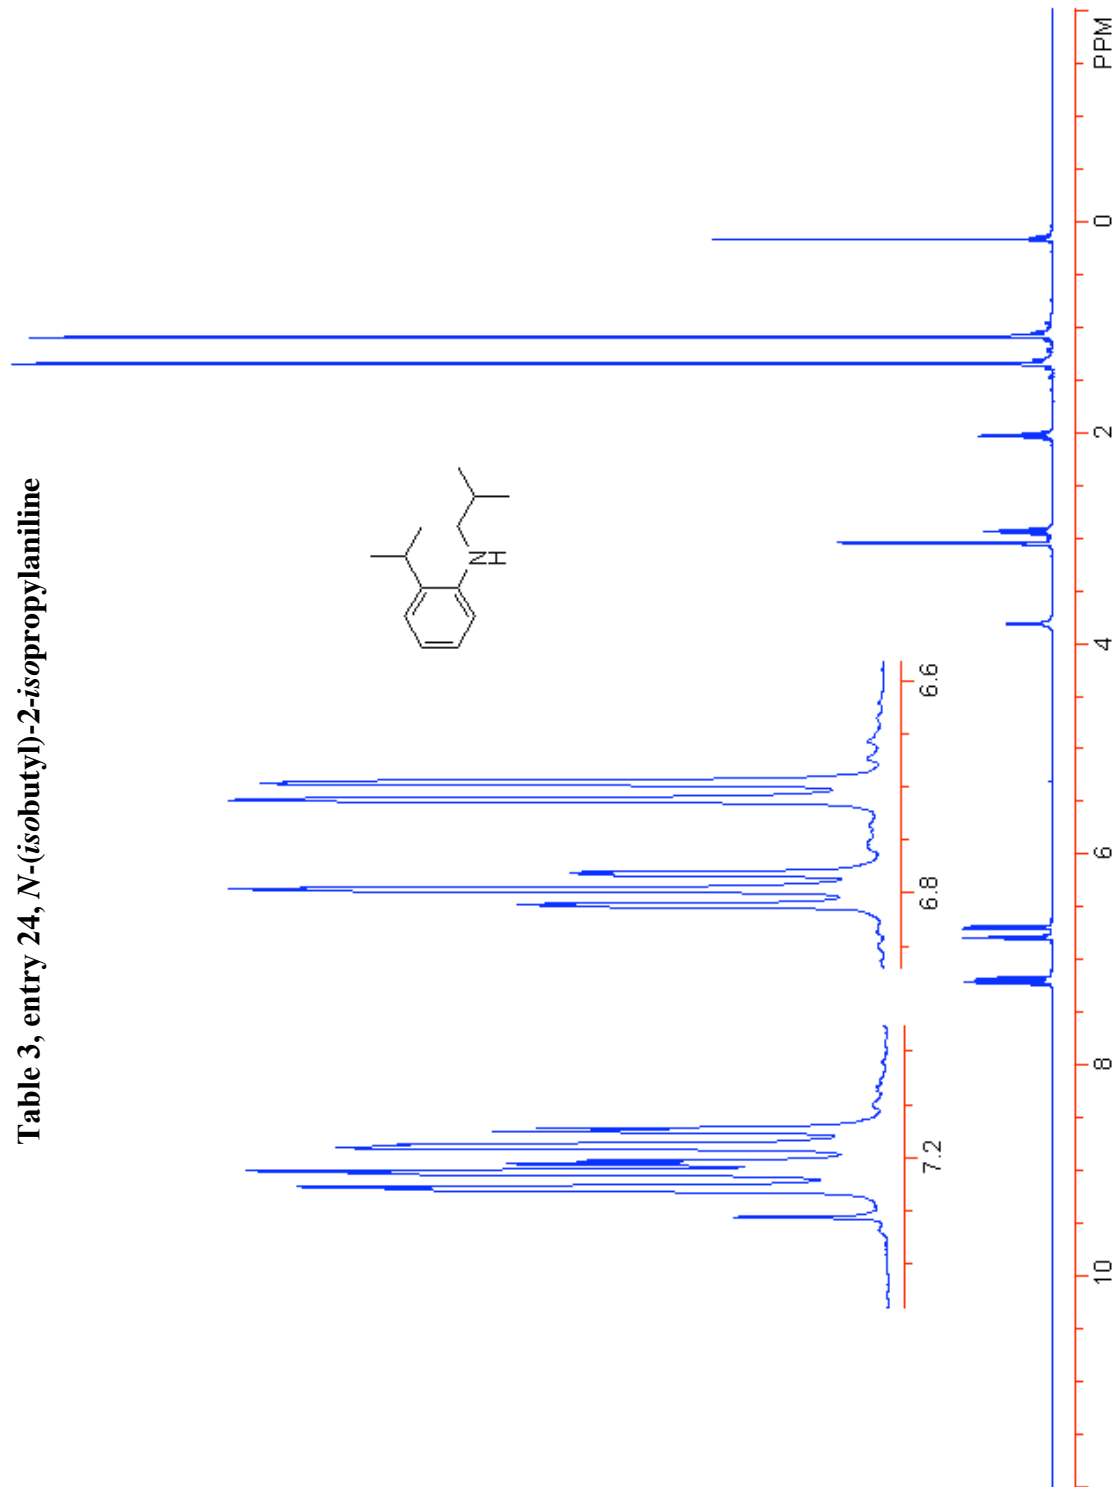

Table 3, entry 24, *N*-(*isobutyl*)-2-*isopropyl*aniline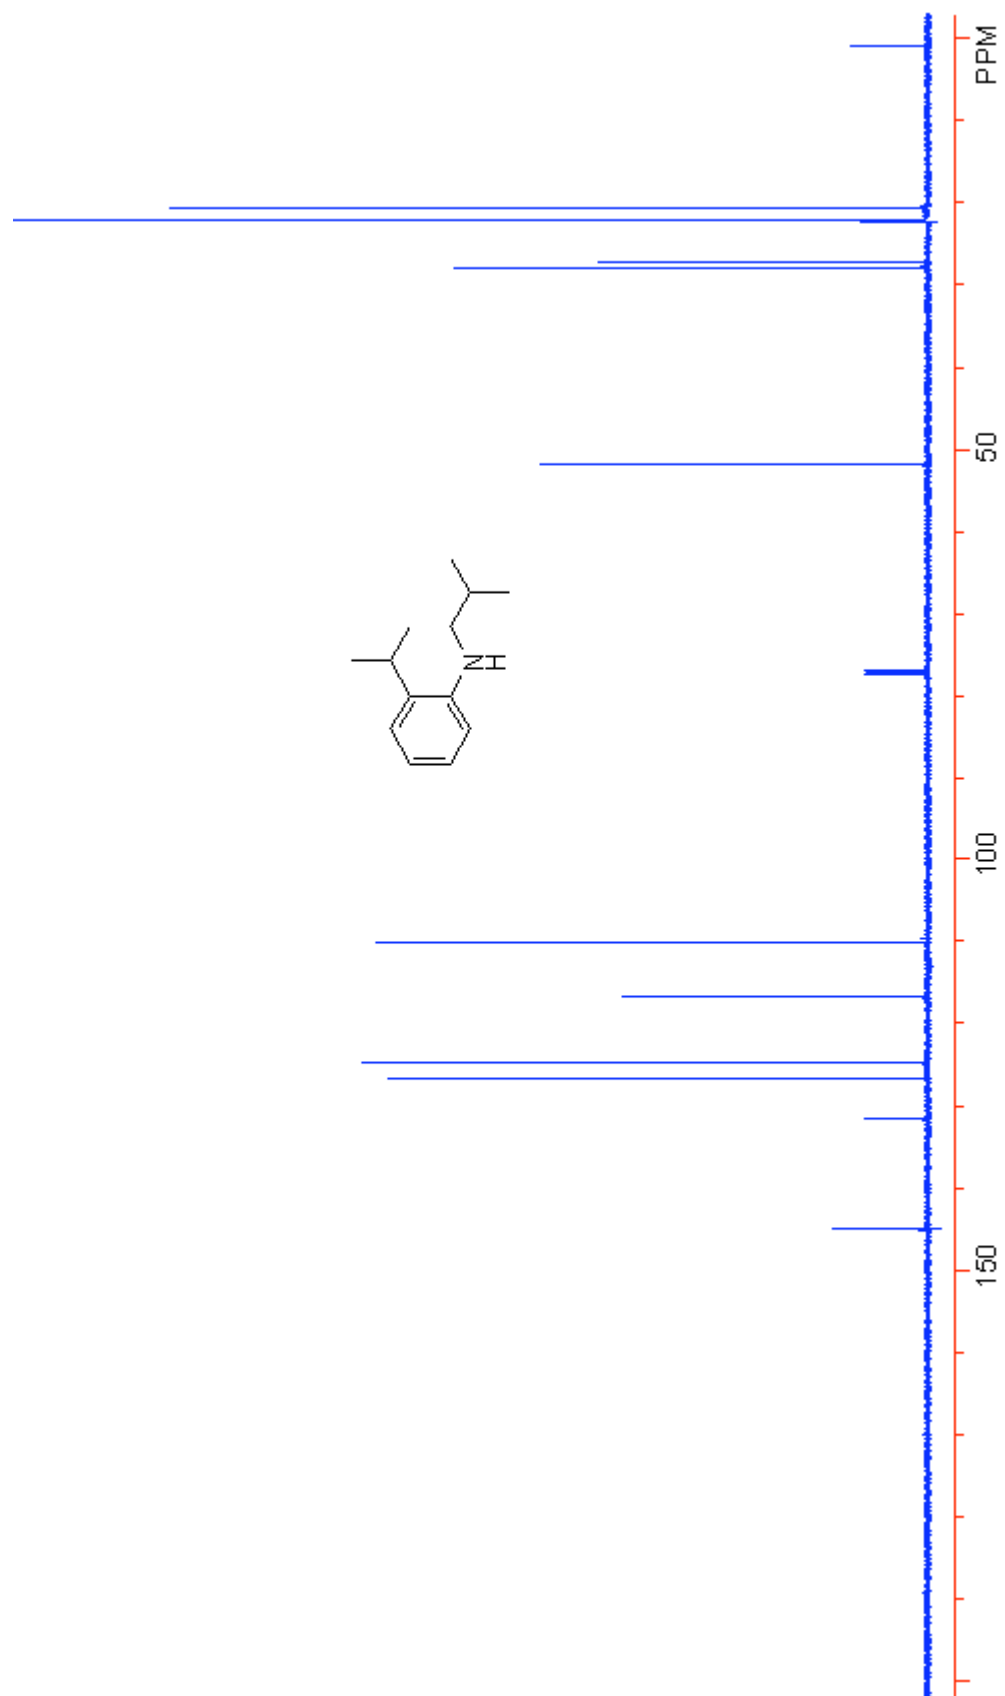

Table 5, entry 4, *N*-Phenylloctylamine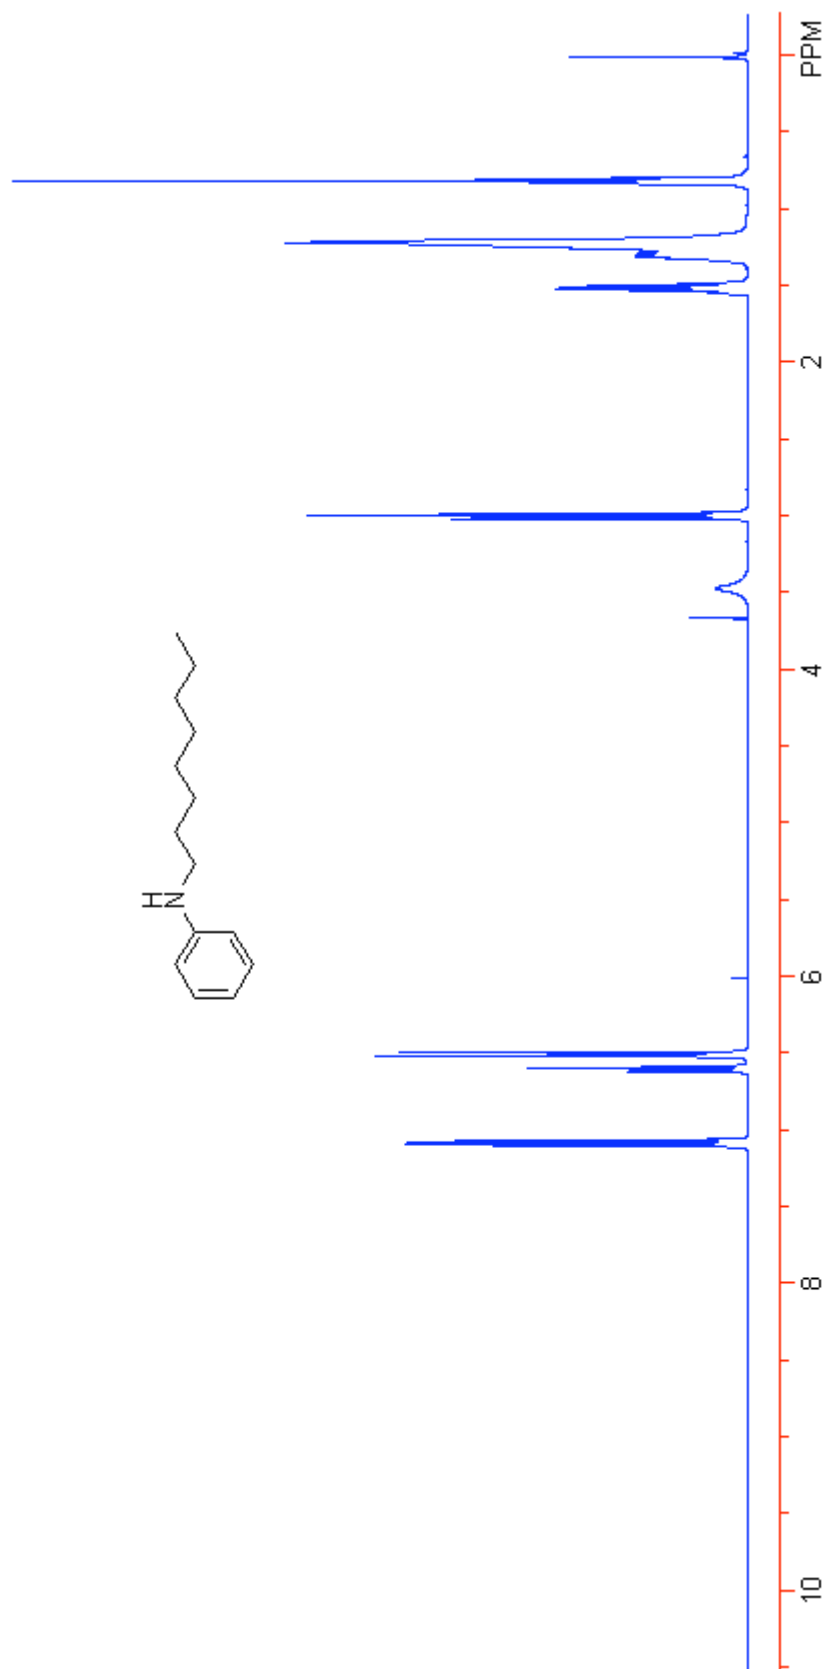

Table 5, entry 4, *N*-Phenyloctylamine

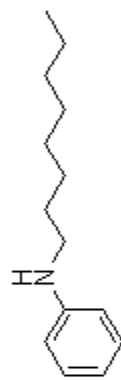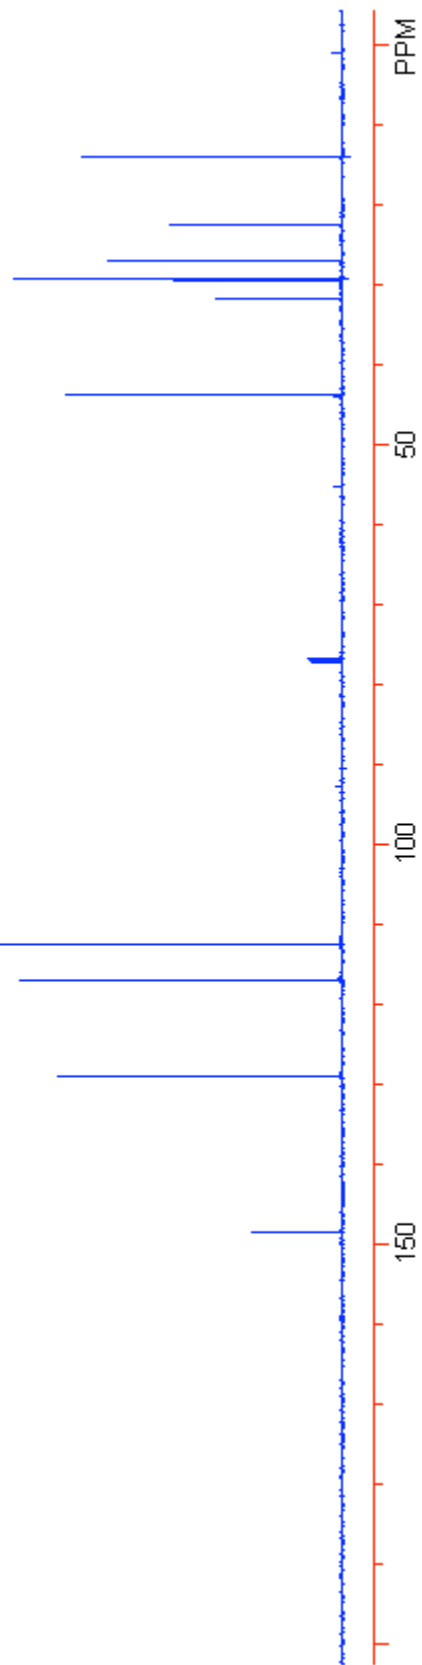

**Table 5, entry 10, *N*-(Cyclohexylamino)-*o*-toluidine**

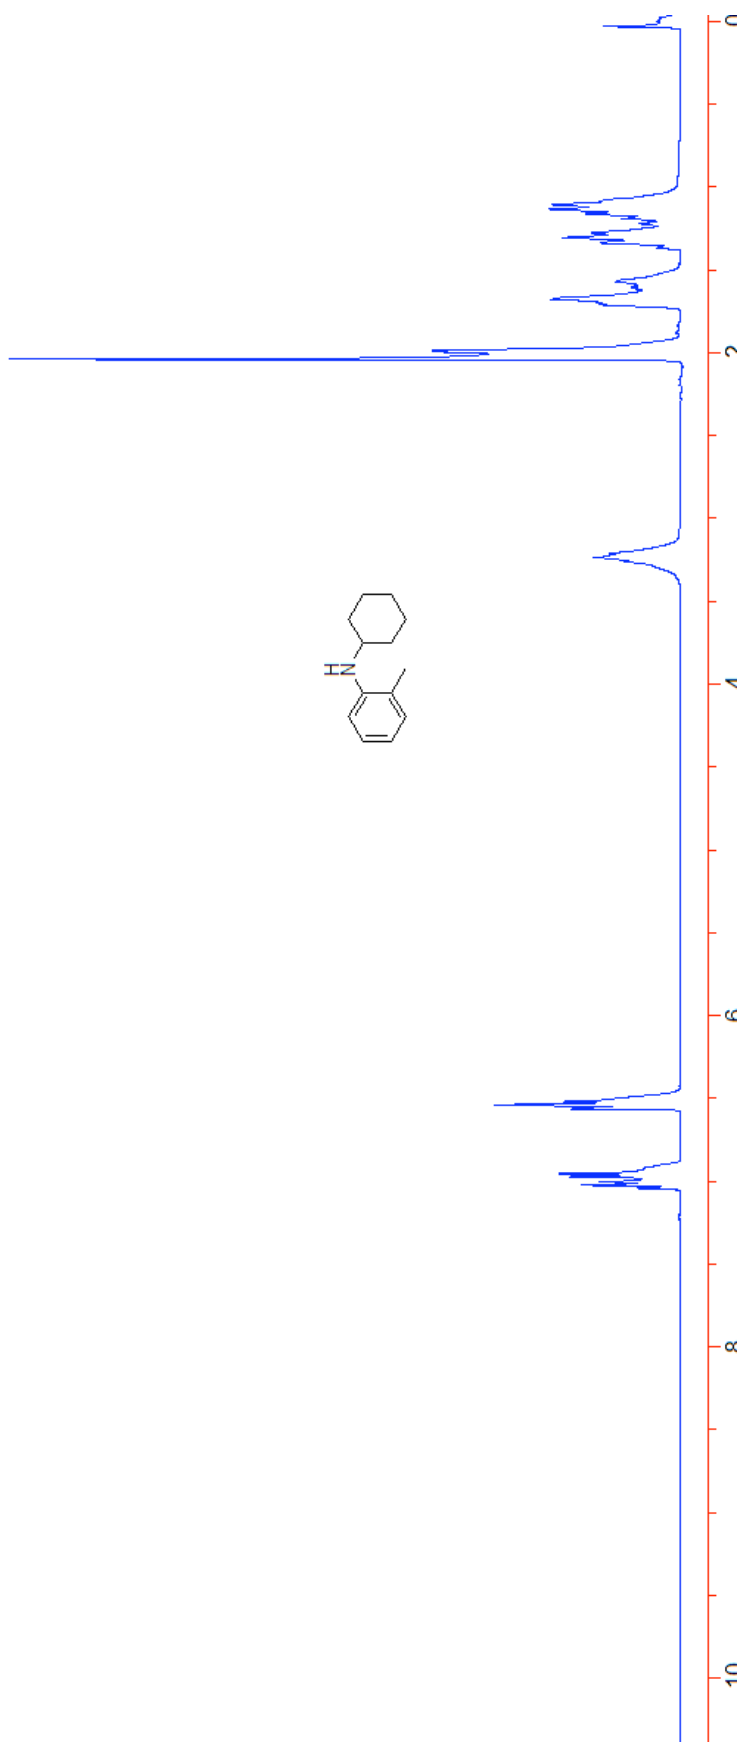

**Table 5, entry 10 , *N*-(Cyclohexylamino)-*o*-toluidine**

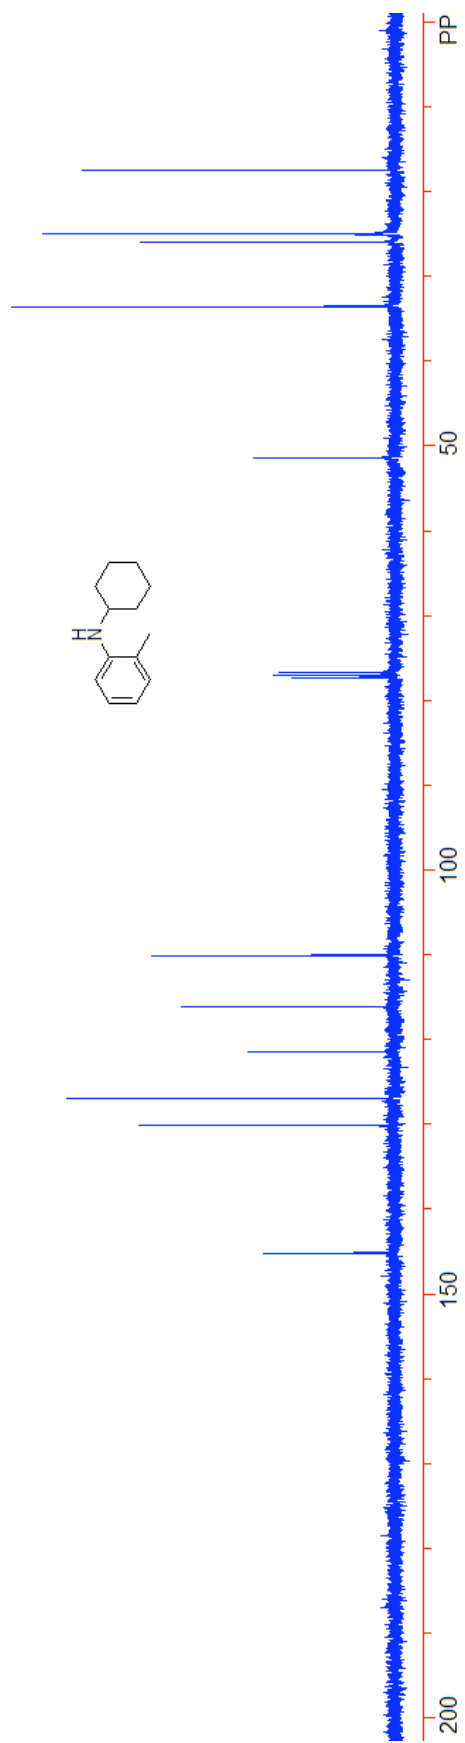

Table 6, entry 3, 2- $\alpha$ -Naphthylaminopyridine

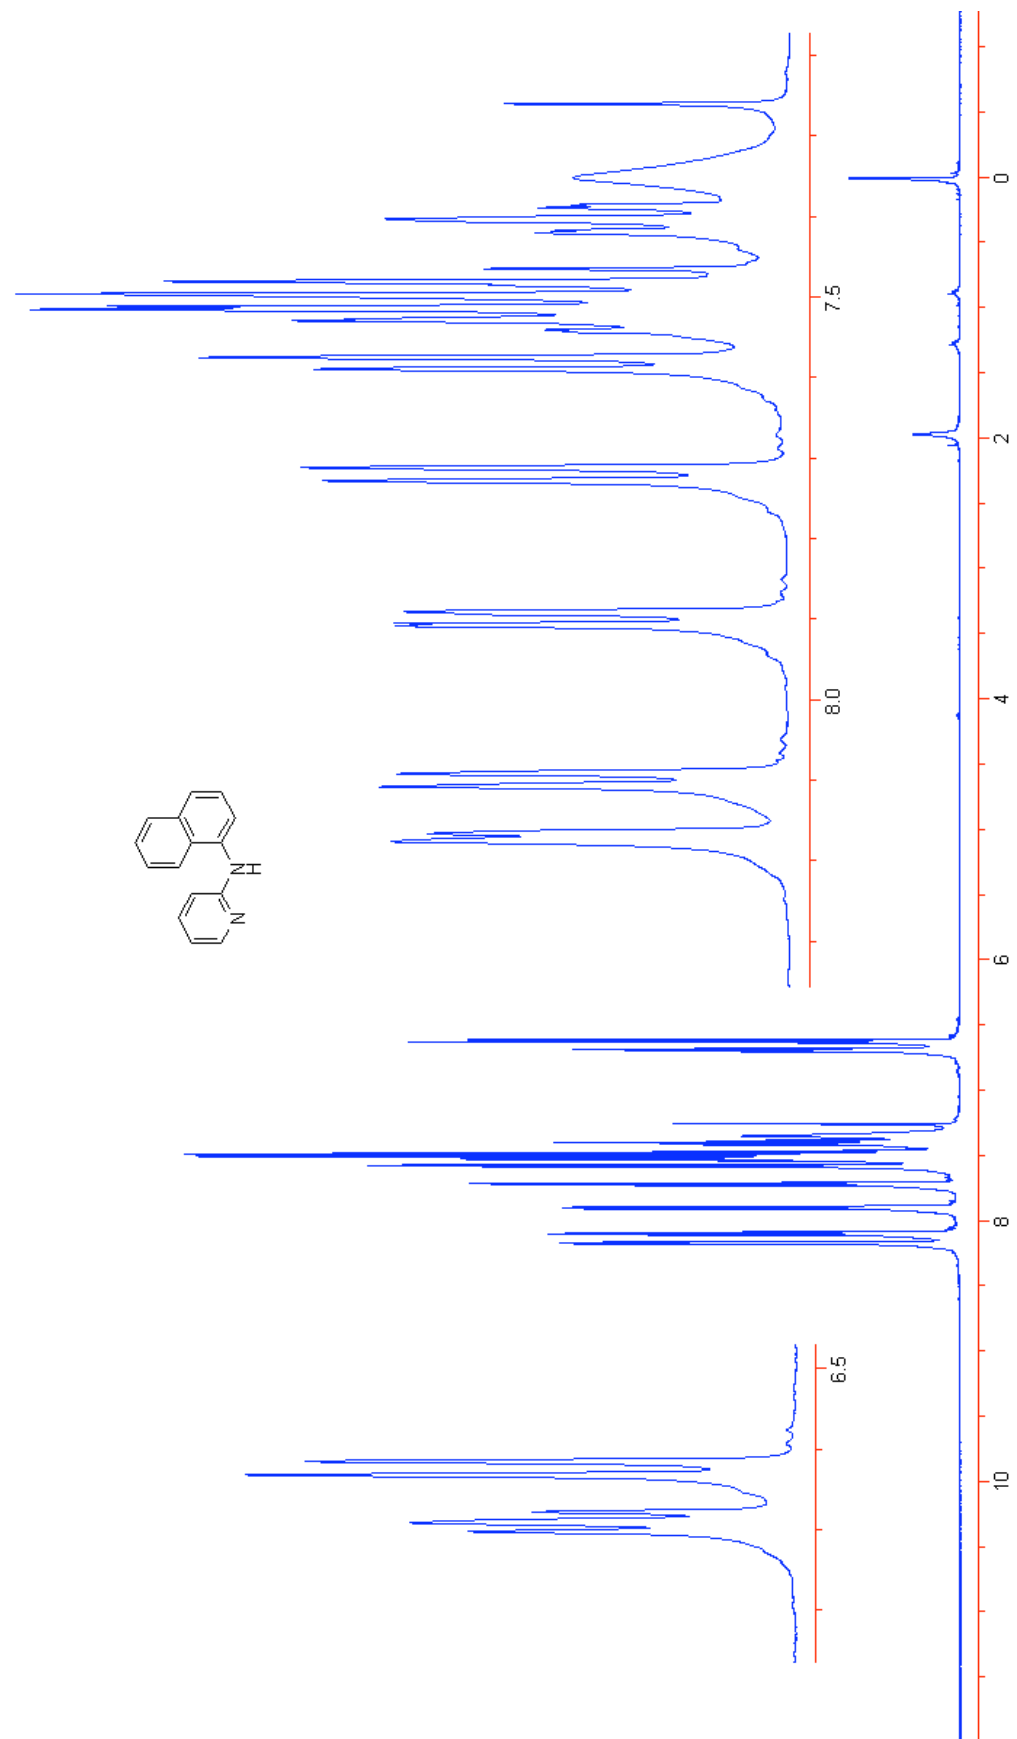



Table 6, entry 3, 2- $\alpha$ -Naphthylaminopyridine

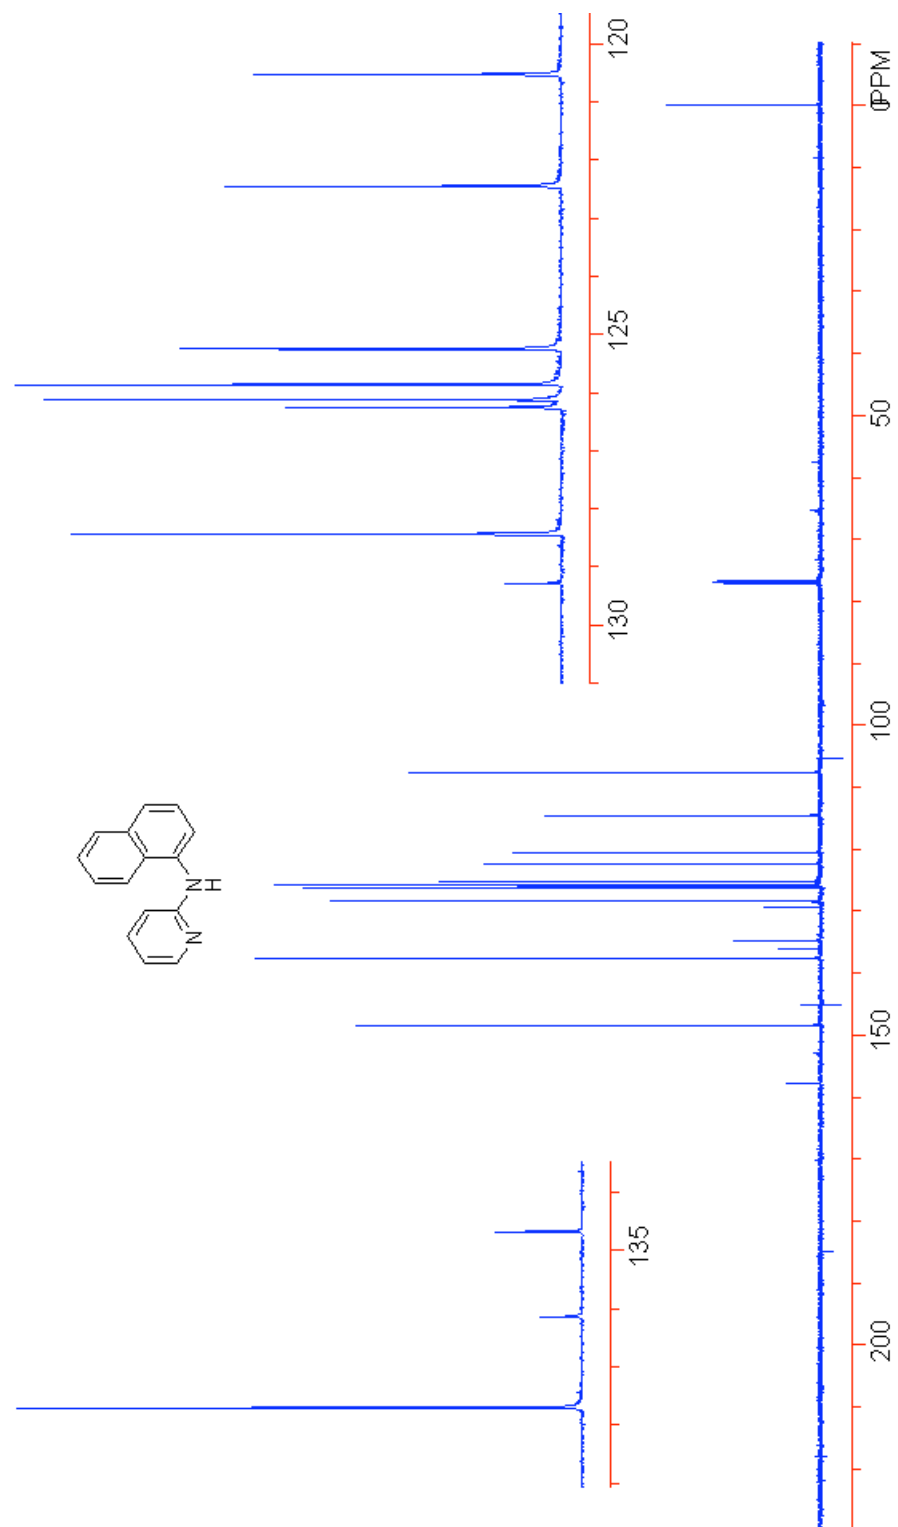

Table 6, entry 6, 2,3'-Dipyridylamine

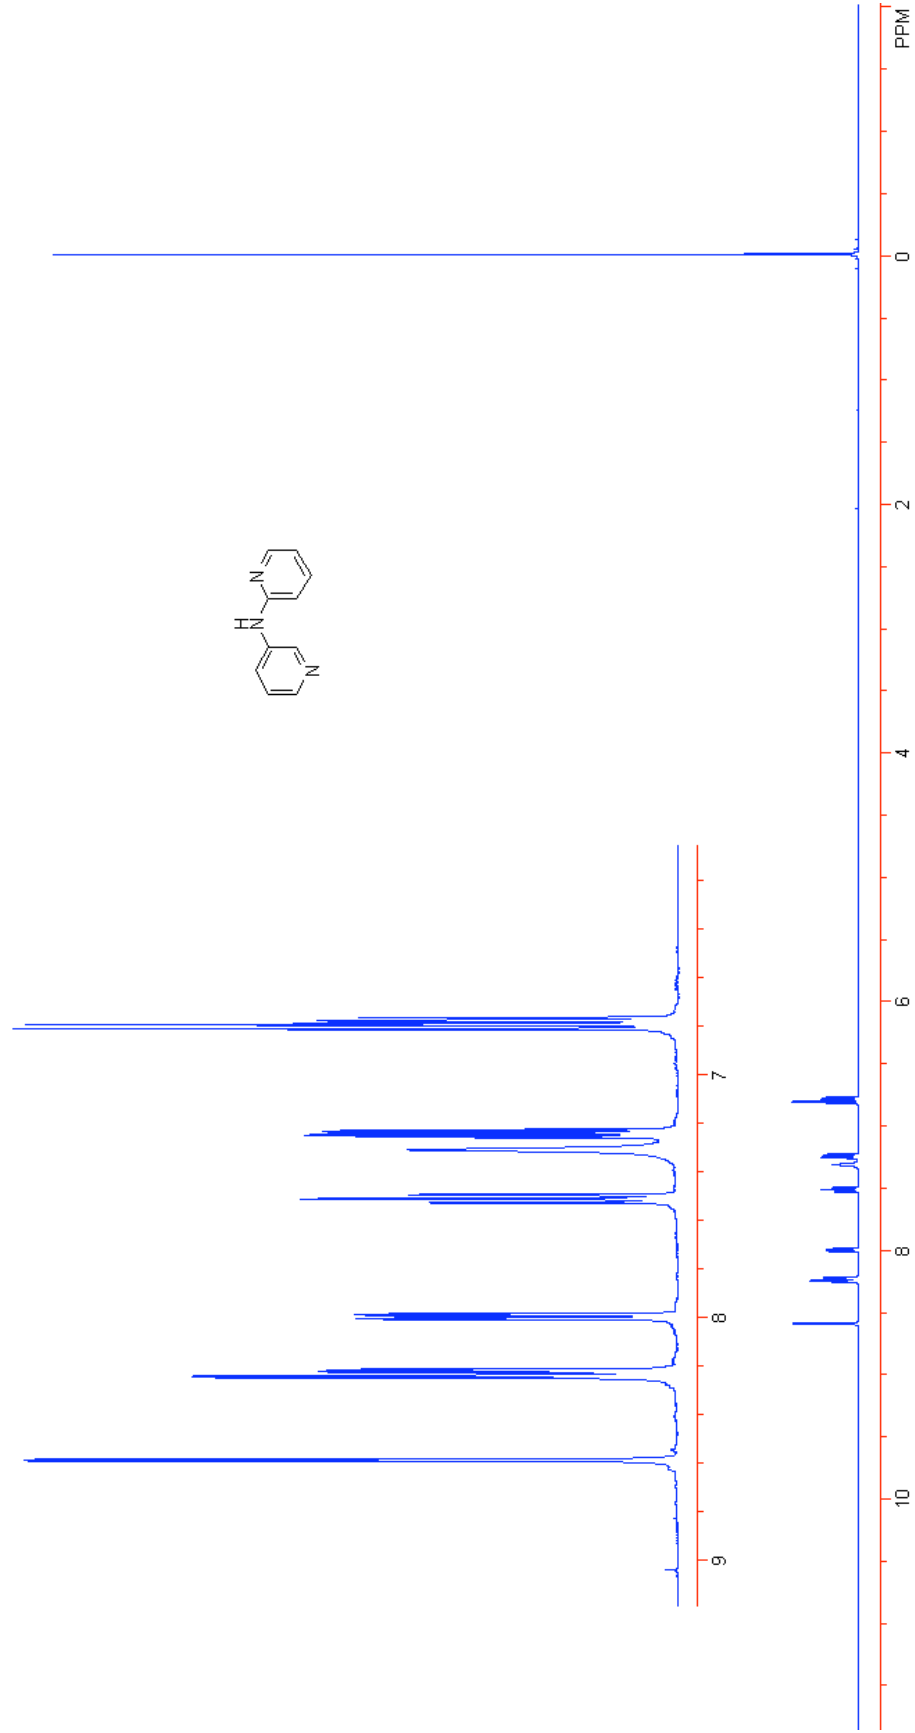

Table 6, entry 6, 2,3'-Dipyridylamine

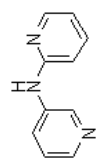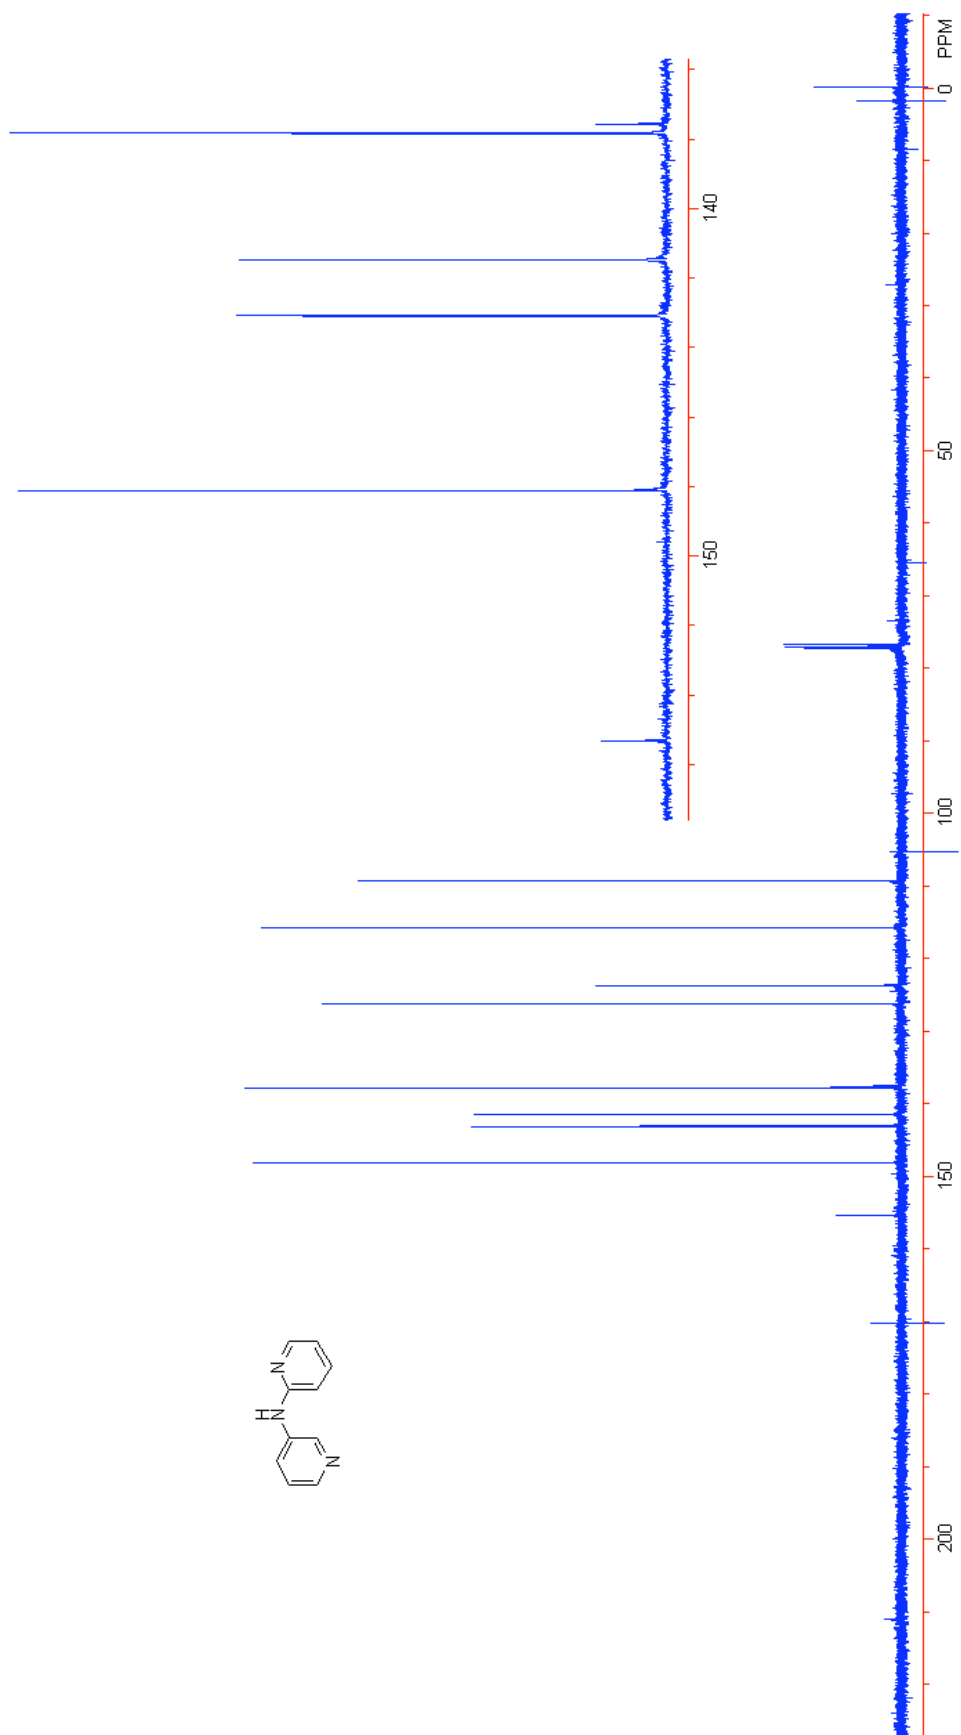

Table 6, entry 9, *N*-3-pyridyl-2-pyrimidinamine

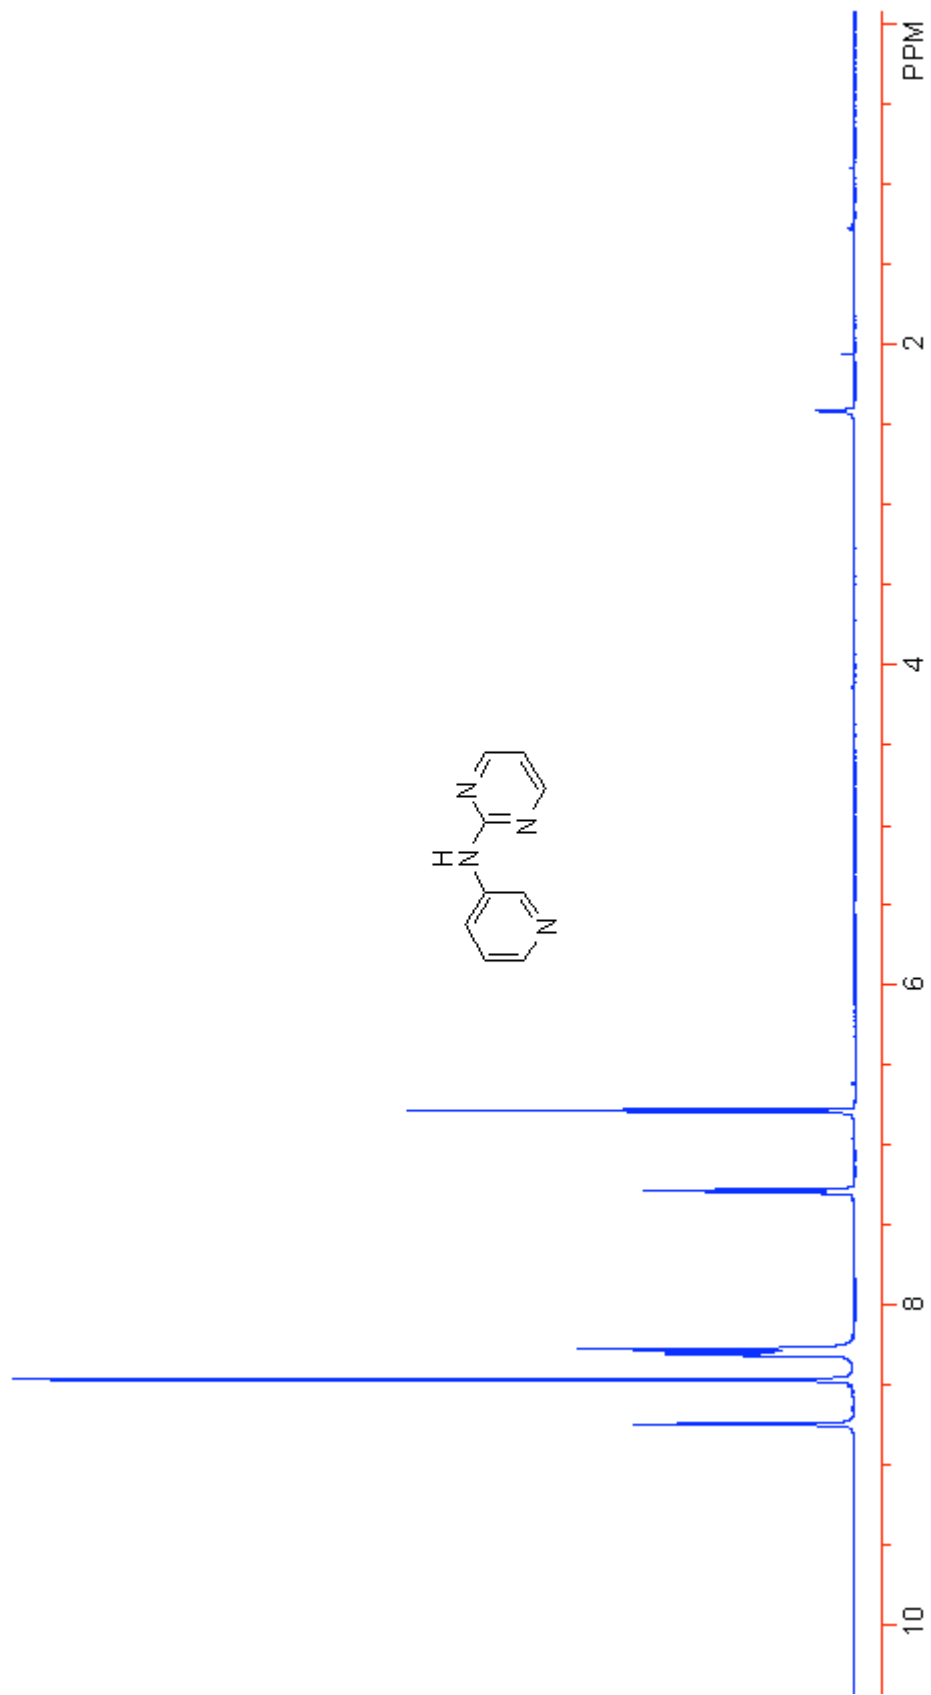

Table 6, entry 9, *N*-3-pyridyl-2-pyrimidinamine

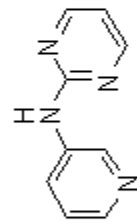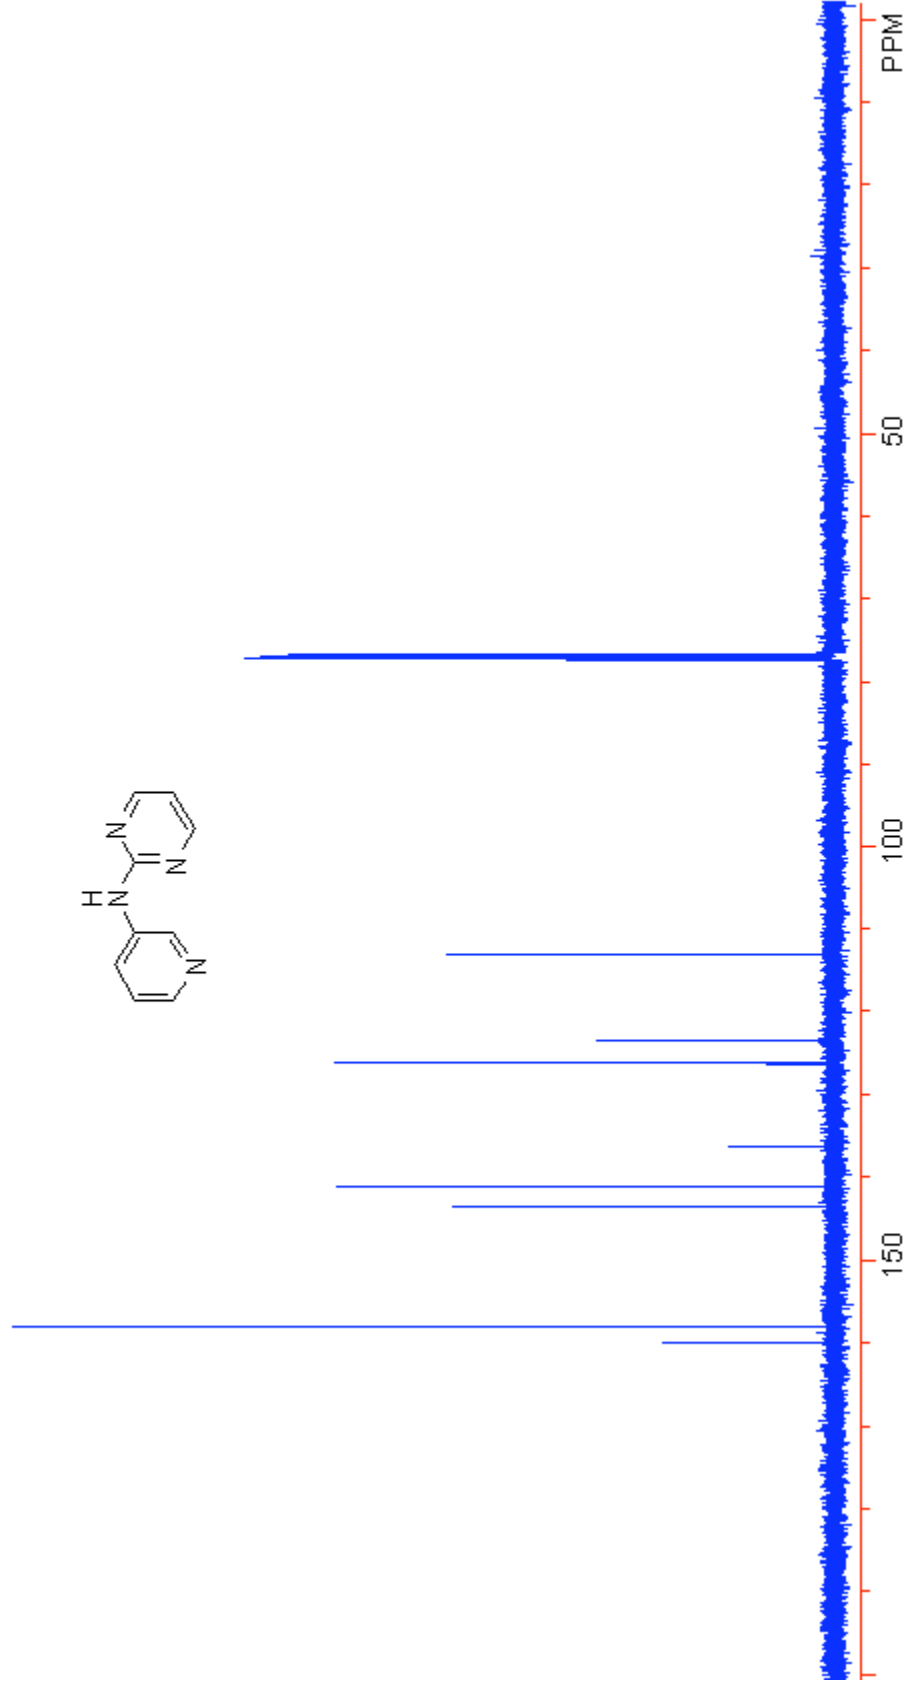

Table 6, entry 10, N-3-Pyridyl-2-pyrazinamine

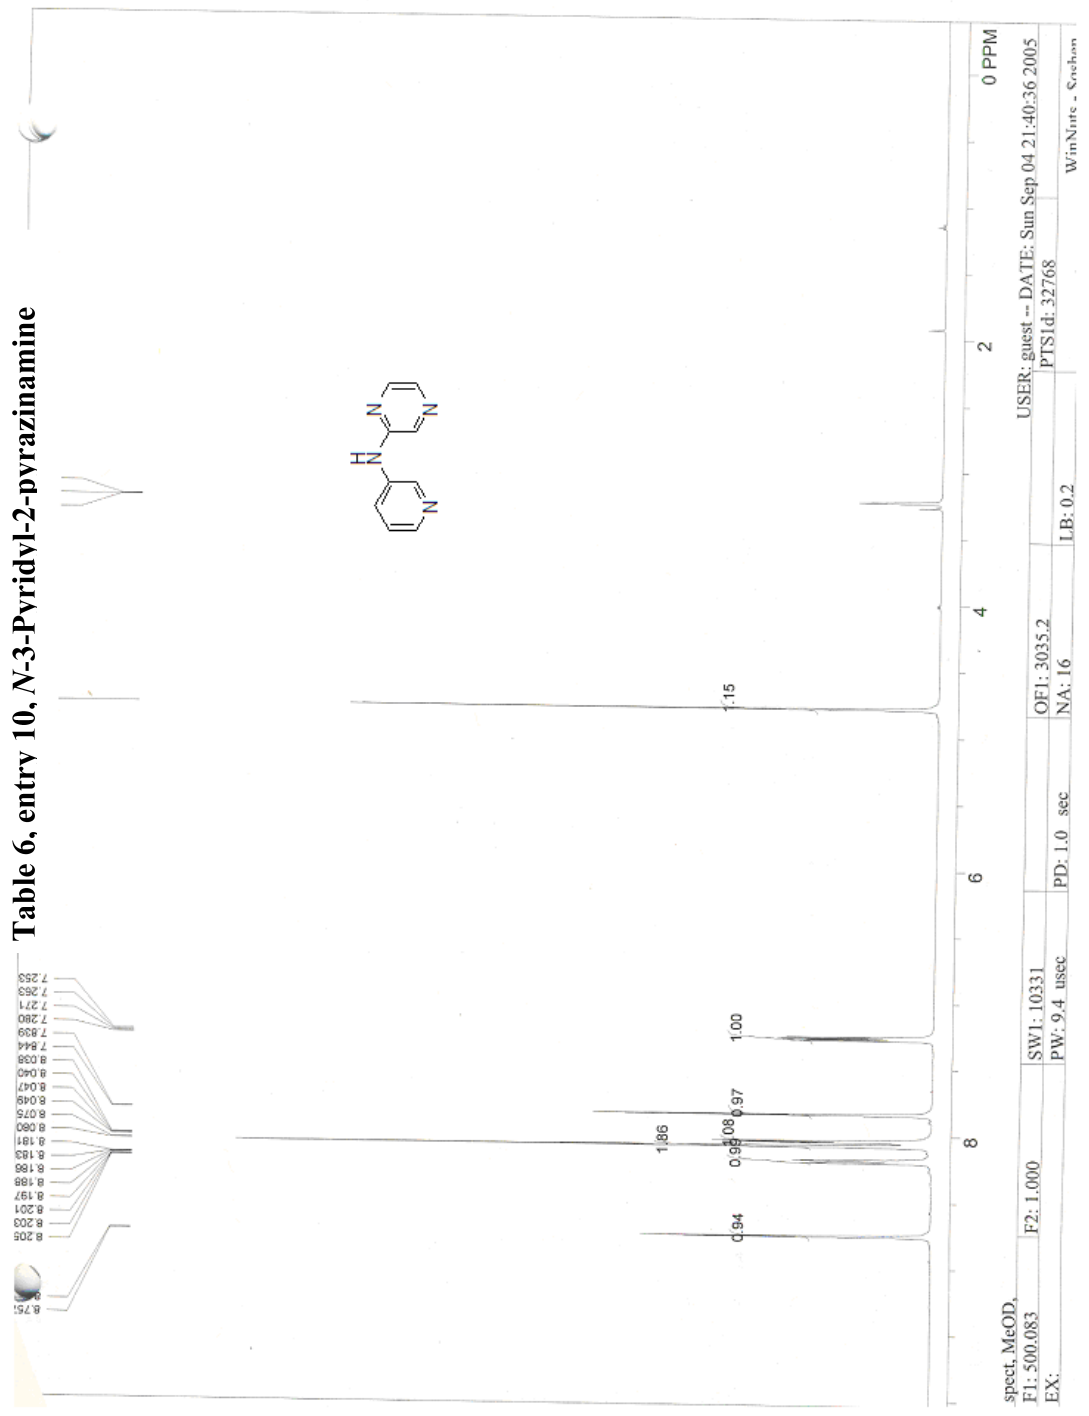

Table 6, entry 10, N-3-Pyridyl-2-pyrazinamine

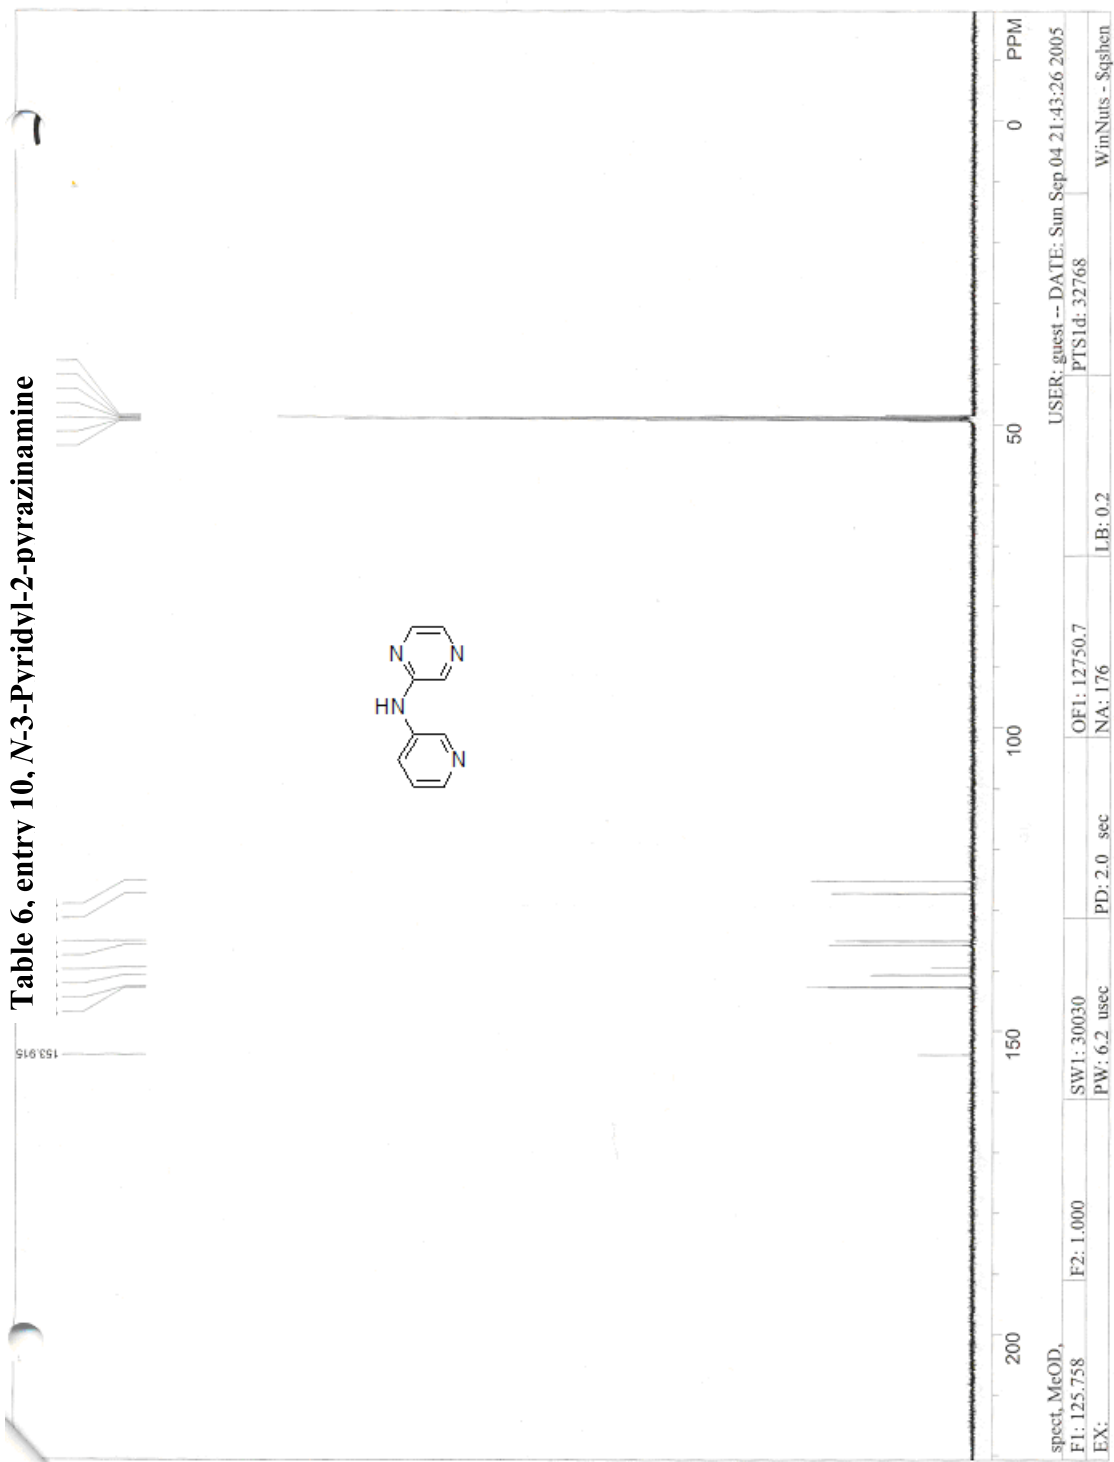

Table 6, entry 13, *N*-Phenyl-*p*-toluidine

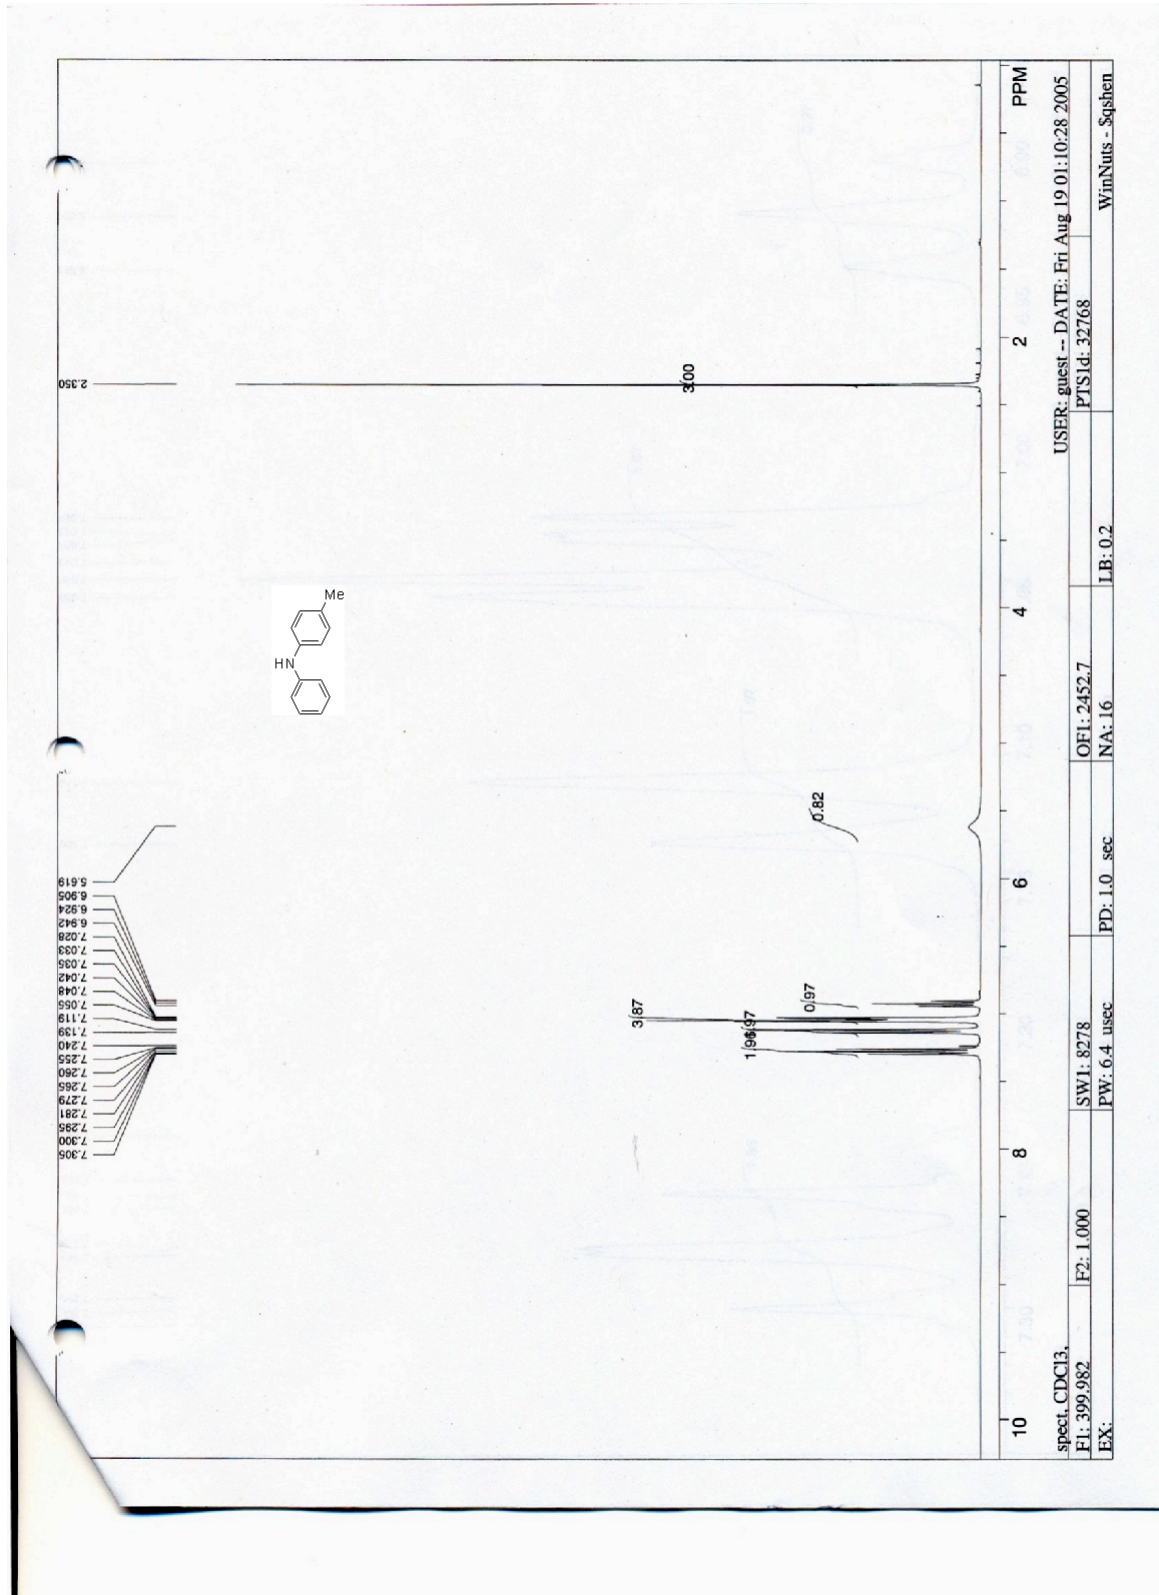



Table 6, entry 13, *N*-Phenyl-*p*-toluidine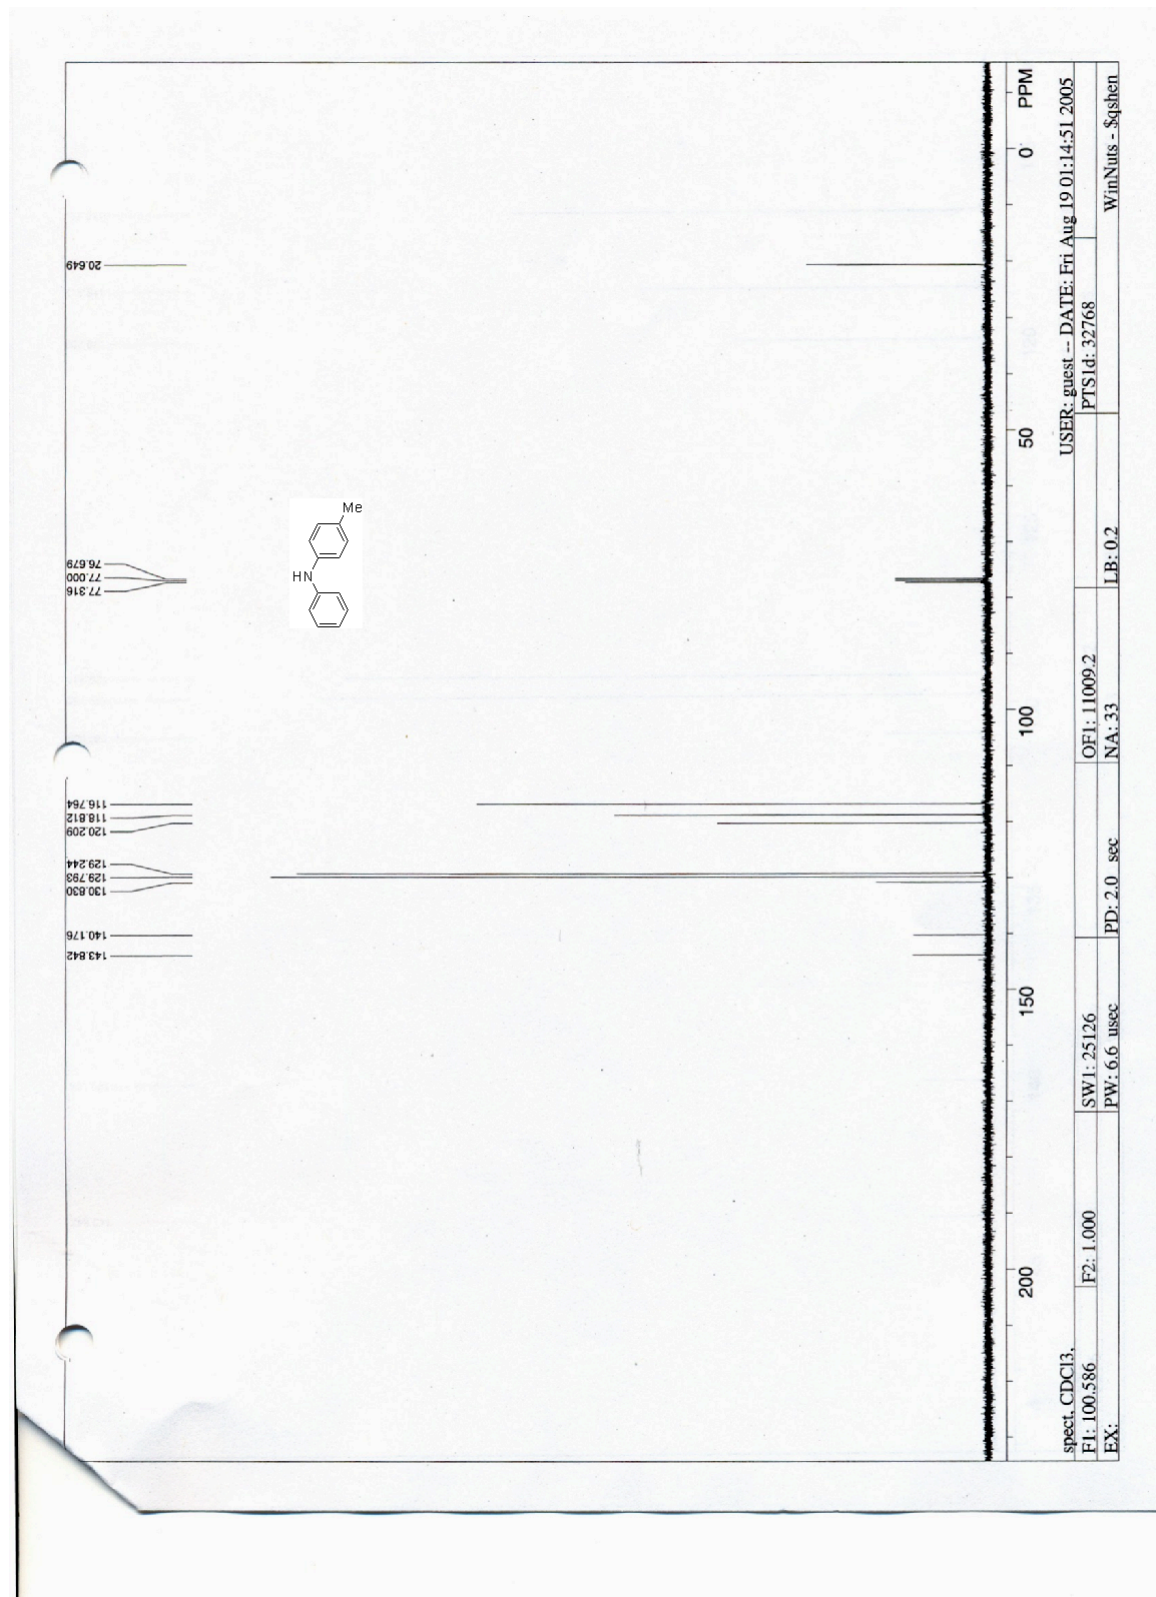

Table 6, entry 15, N-(2-Pyridyl)-aniline

S-VIII-134

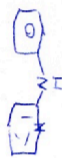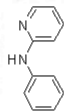

Current Data Parameters  
 NAME Sep05-2005-05h  
 EXPNO 10  
 PROCNO 1

F2 - Acquisition Parameters  
 Date\_ 20050905  
 Time 11.18  
 INSTRUM spect  
 PROBHD 5mm\_BNP\_H-F-  
 PULPROG zg30  
 TD 65536  
 SOLVENT CDCl3  
 NS 10  
 DS 2  
 SWH 8278.145 Hz  
 FIDRES 0.126314 Hz  
 AQ 3.9584243 sec  
 RG 128  
 DM 60.400 usec  
 DE 6.00 usec  
 TE 300.0 K  
 D1 1.00000000 sec

\*\*\*\*\* CHANNEL f1 \*\*\*\*\*  
 NU1 1H  
 P1 6.40 usec  
 PL1 -6.00 dB  
 SF01 399.9824700 MHz

F2 - Processing parameters  
 SI 32768  
 SF 399.9800408 MHz  
 EM  
 SSB 0  
 LB 0.30 Hz  
 GB 0  
 PC 1.00

1D NMR plot parameters  
 CX 20.00 cm  
 F1P 11.000 ppm  
 F1 4369.76 Hz  
 F2P -1.000 ppm  
 F2 -399.98 Hz  
 PPKM 0.60000 ppm/cm  
 HZCM 239.98802 Hz/cm

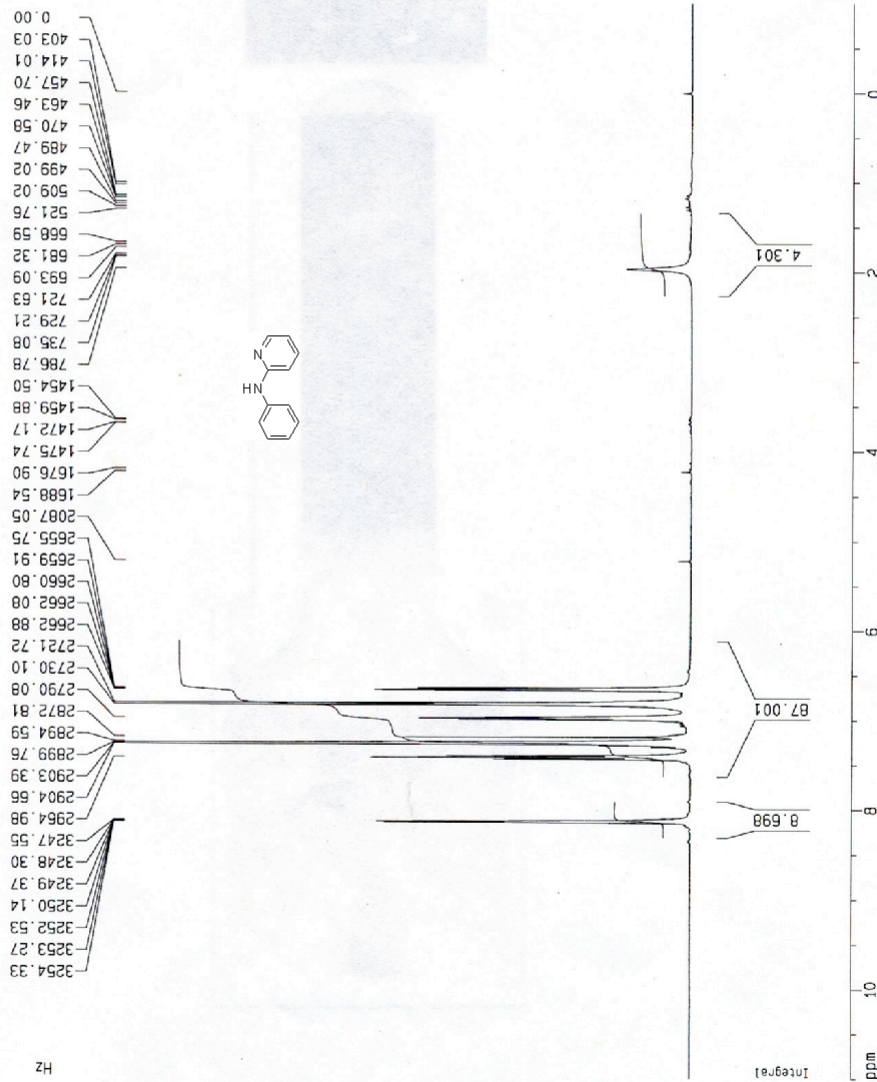

Table 6, entry 15, N-(2-Pyridyl)-aniline

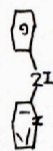

S-VIII-134

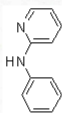

Current Data Parameters  
 NAME Sep05-2005-osh  
 EXPNO 11  
 PROCNO 1

F2 - Acquisition Parameters  
 Date\_ 20050905  
 Time 11.20  
 INSTRUM spect  
 PROBHD 5mm\_GNP\_HF-  
 PULPROG zgpg30  
 ID G5036  
 SOLVENT CDCl3  
 NS 128  
 DS 4  
 SWH 25125.629 Hz  
 FIDRES 1.58387 Hz  
 AQ 1.3042464 SEC  
 RG 6152  
 DW 19.900 USEC  
 DE 6.00 USEC  
 TE 300.0 K  
 D1 2.0000000 SEC  
 d11 0.0300000 SEC  
 d12 0.0000000 SEC

\*\*\*\*\* CHANNEL f1 \*\*\*\*\*  
 NUC1 13C  
 P1 6.55 USEC  
 PL1 -3.00 DB  
 SF01 100.5850742 MHZ

\*\*\*\*\* CHANNEL f2 \*\*\*\*\*  
 CDPORG2 waltz16  
 NUC2 1H  
 PCPD2 80.00 USEC  
 PL2 -6.00 DB  
 PL12 18.00 DB  
 PL13 18.00 DB  
 SF02 399.9815999 MHZ

F2 - Processing parameters  
 SI 32768  
 SF 100.5750110 MHZ  
 MDW EM  
 SSB 0  
 LB 1.00 Hz  
 GB 0  
 PC 1.40

1D NMR plot parameters  
 CX 20.00 cm  
 F1P 215.000 ppm  
 F1 21623.63 Hz  
 F2P -5.000 ppm  
 F2 -502.87 Hz  
 PPMCM 11.00000 ppm/cm  
 HZCM 1106.39250 Hz/cm

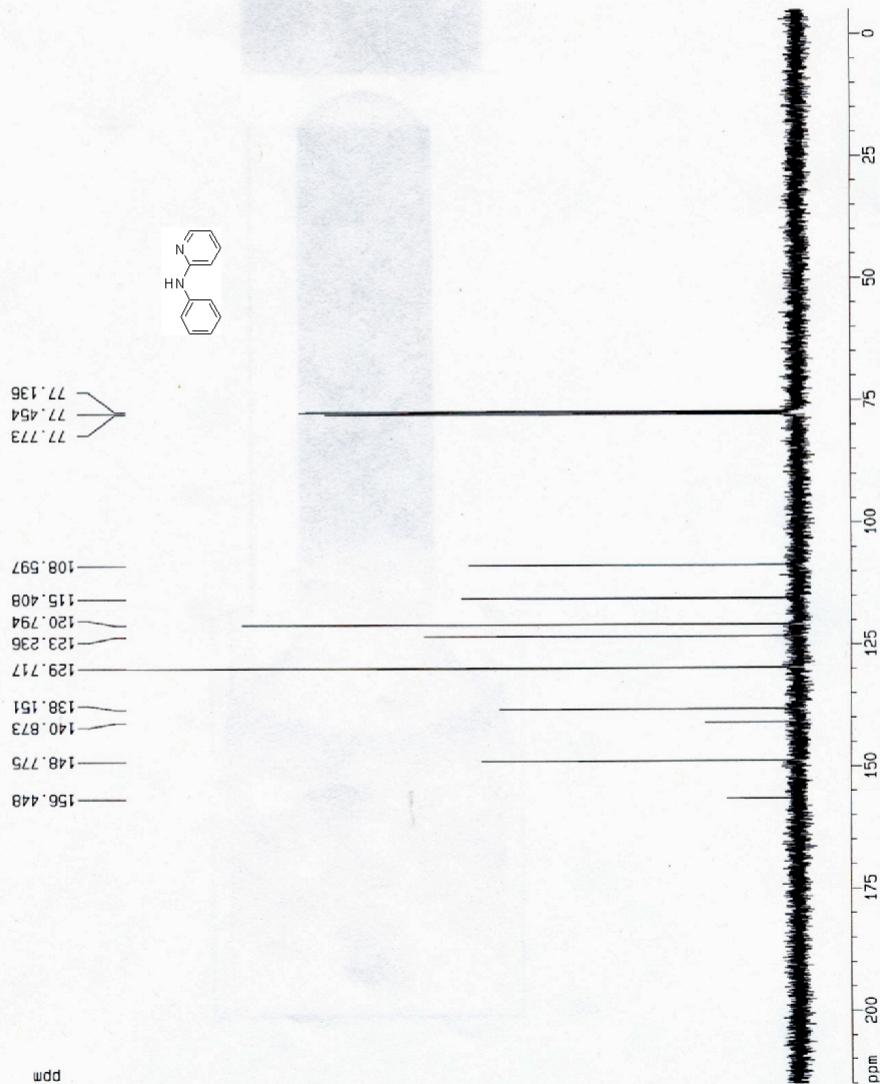

Table 6, entry 18, N-(p-Tolyl)-p-anisidine

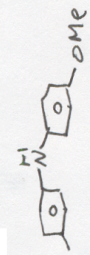

Current Data Parameters  
 NAME Aug24-2005-qsh  
 EXPNO 10  
 PROCNO 1

F2 - Acquisition Parameters  
 Date\_ 20050824  
 Time 0.38  
 INSTRUM spect  
 PROBHD 5mm\_BBO\_Dire  
 PULPROG zg30  
 TD 65536  
 SOLVENT CDCl3  
 NS 6  
 DS 2  
 SWH 8278.146 Hz  
 FIDRES 0.126314 Hz  
 AQ 3.9584243 sec  
 RG 64  
 DW 60.400 usec  
 DE 6.00 usec  
 TE 300.0 K  
 D1 1.0000000 sec

===== CHANNEL f1 =====  
 NUC1 1H  
 P1 8.00 usec  
 PL1 -3.00 dB  
 SF01 400.1324710 MHz

F2 - Processing parameters  
 SI 32768  
 SF 400.1300644 MHz  
 MDW EM  
 SSB 0  
 LB 0.30 Hz  
 GB 0  
 PC 1.00

1D NMR plot parameters  
 CX 20.00 cm  
 F1P 11.000 ppm  
 F1 4401.43 Hz  
 F2P -1.000 ppm  
 F2 -400.13 Hz  
 PPMCM 0.60000 ppm/cm  
 HZCM 240.07803 Hz/cm

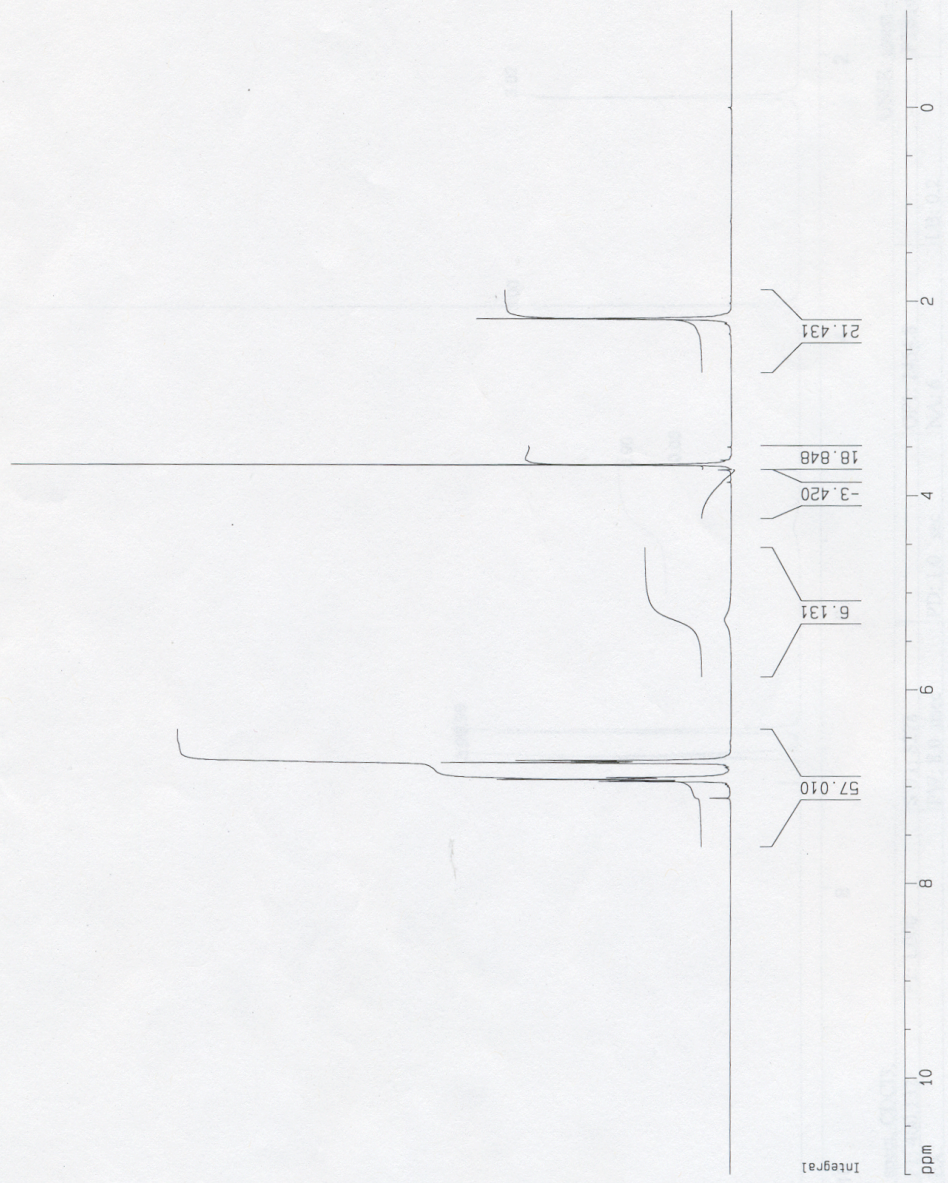

Integral

Table 6, entry 18, *N*-(*p*-Tolyl)-*p*-anisidine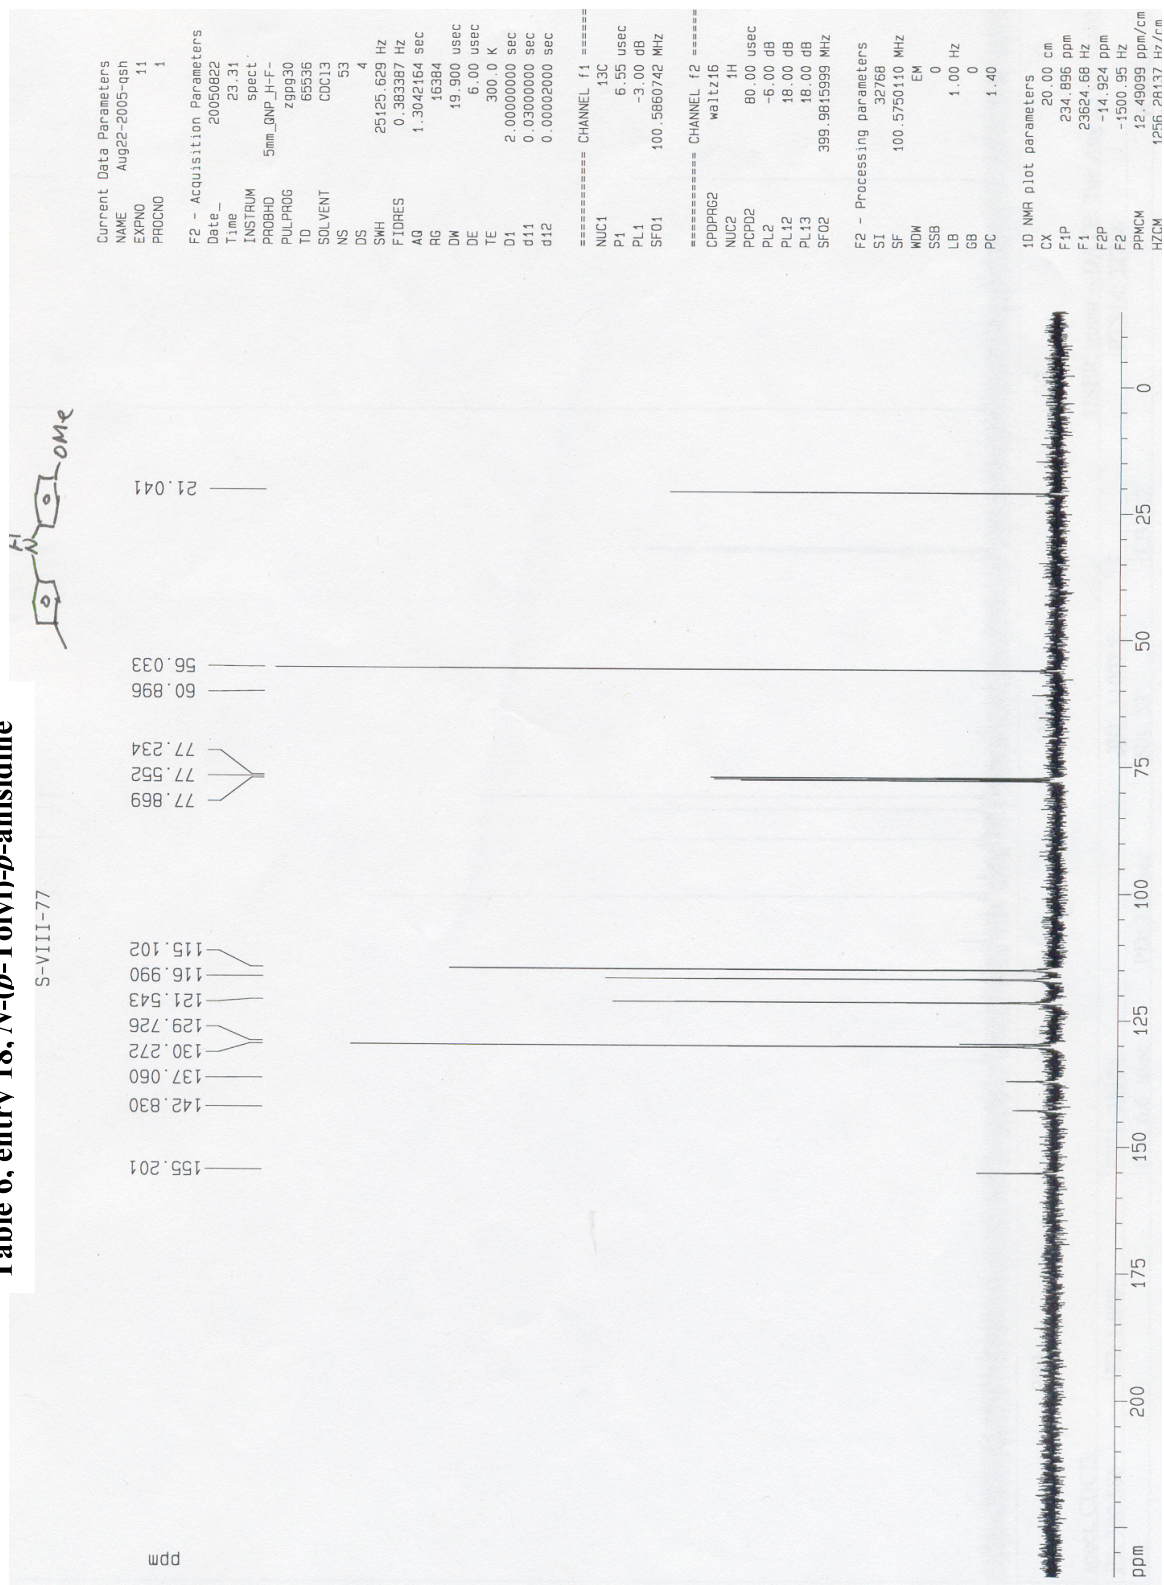

Table 6, entry 19, 3,4'-Dimethoxydiphenylamine aniline

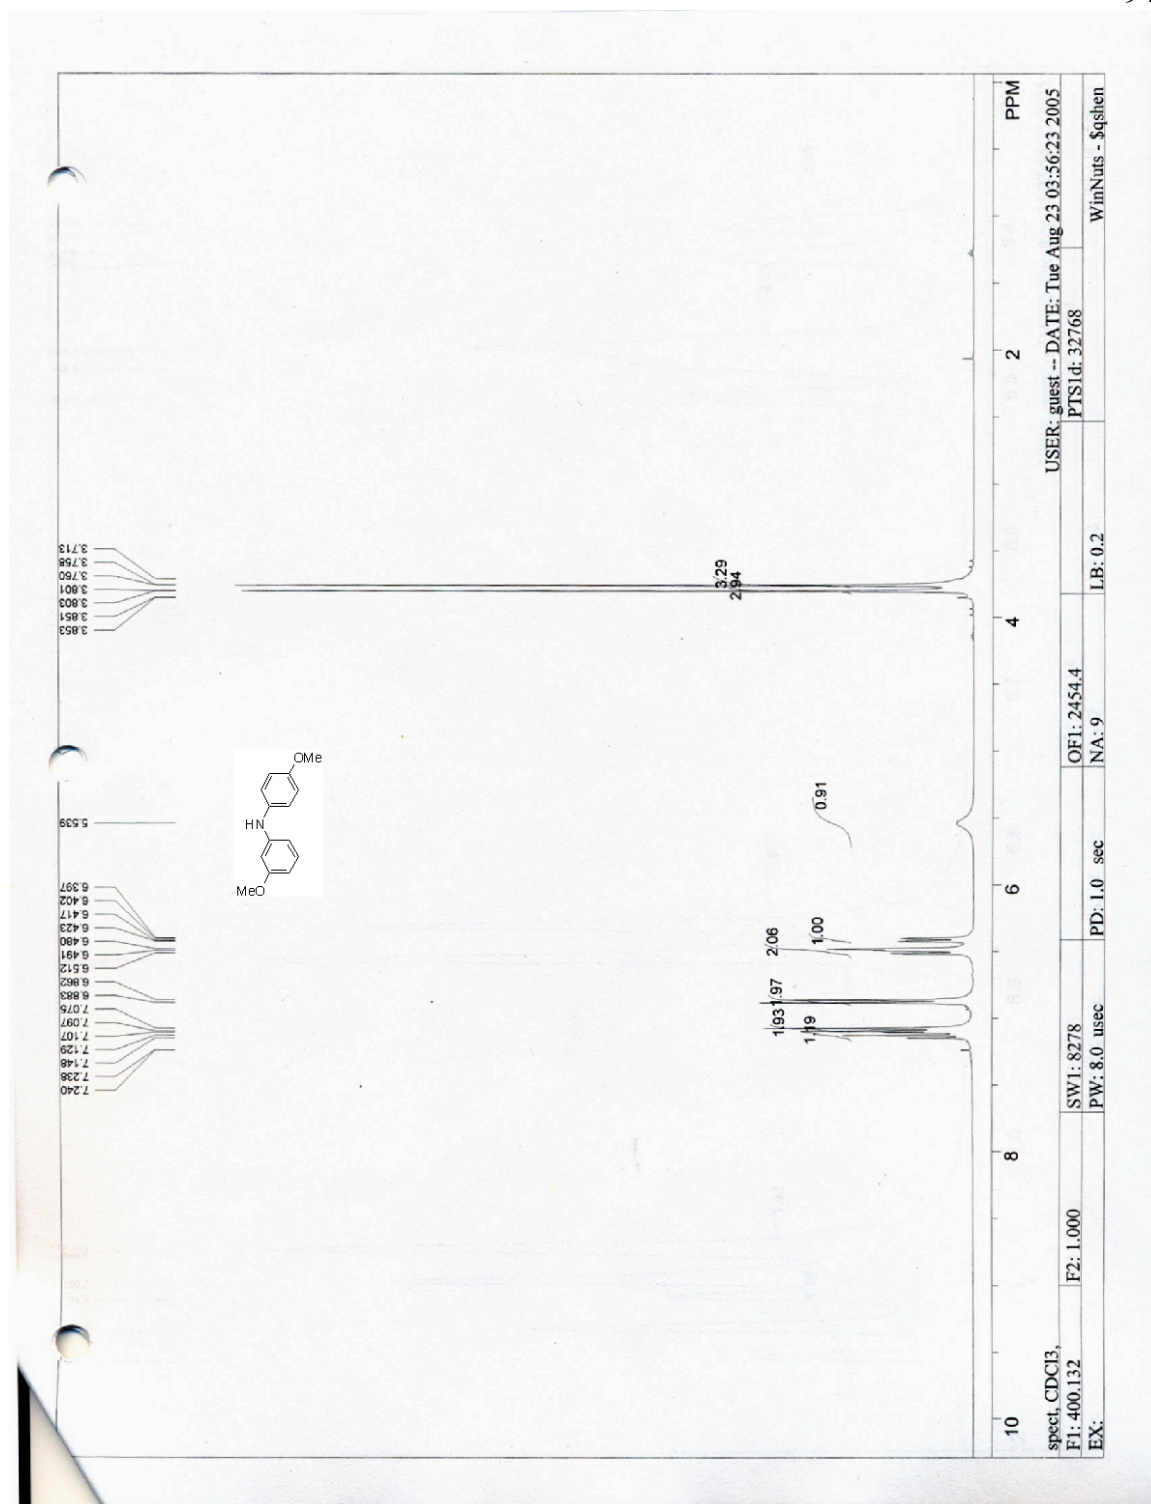

Table 6, entry 19, 3,4'-Dimethoxydiphenylamine aniline

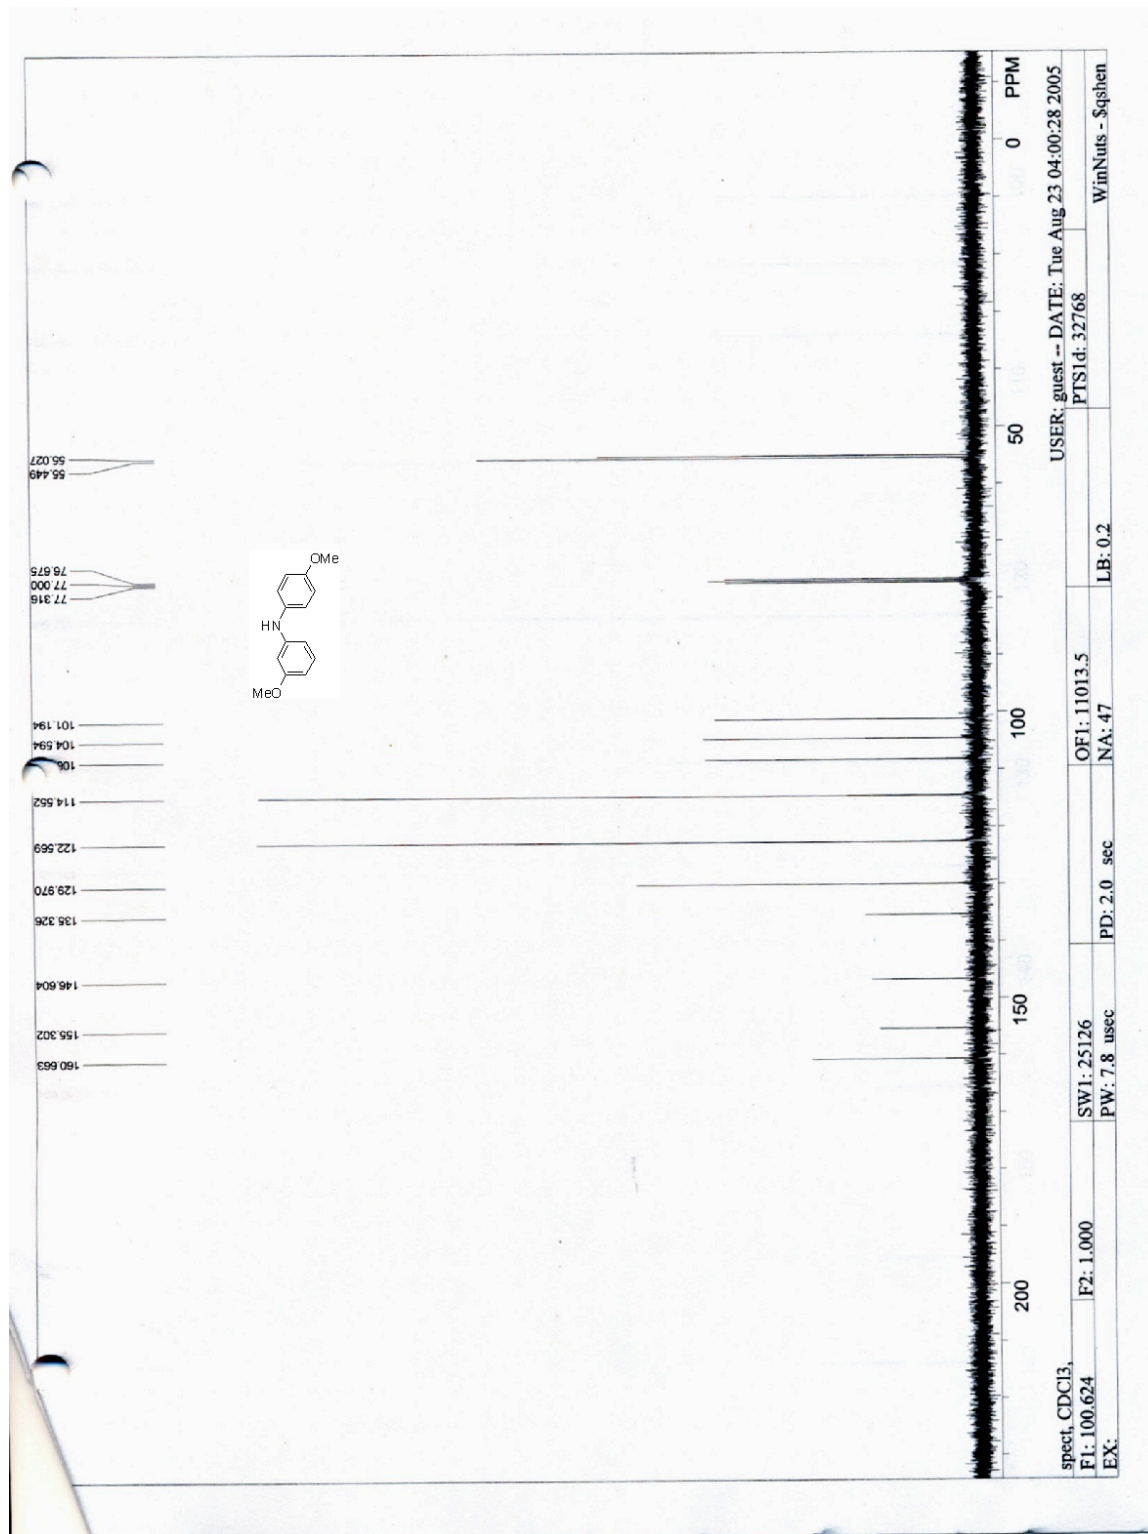

Table 6, entry 21, *N*-(*o*-Tolyl)-*p*-toluidine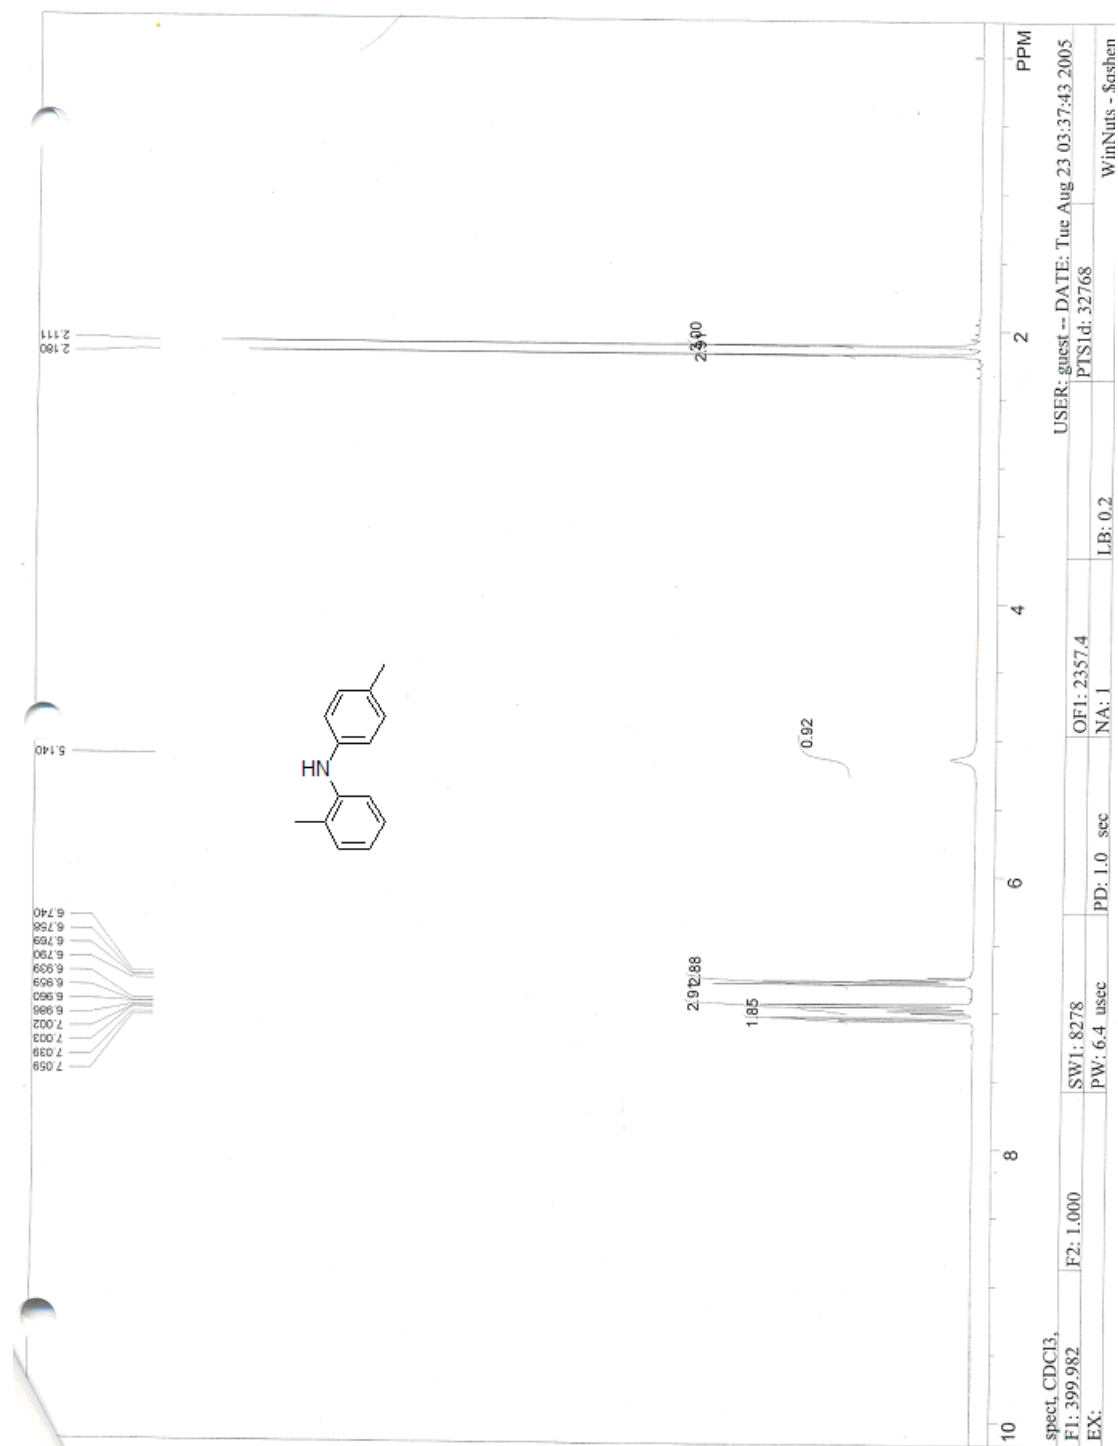



Table 6, entry 21, *N*-(*o*-Tolyl)-*p*-toluidine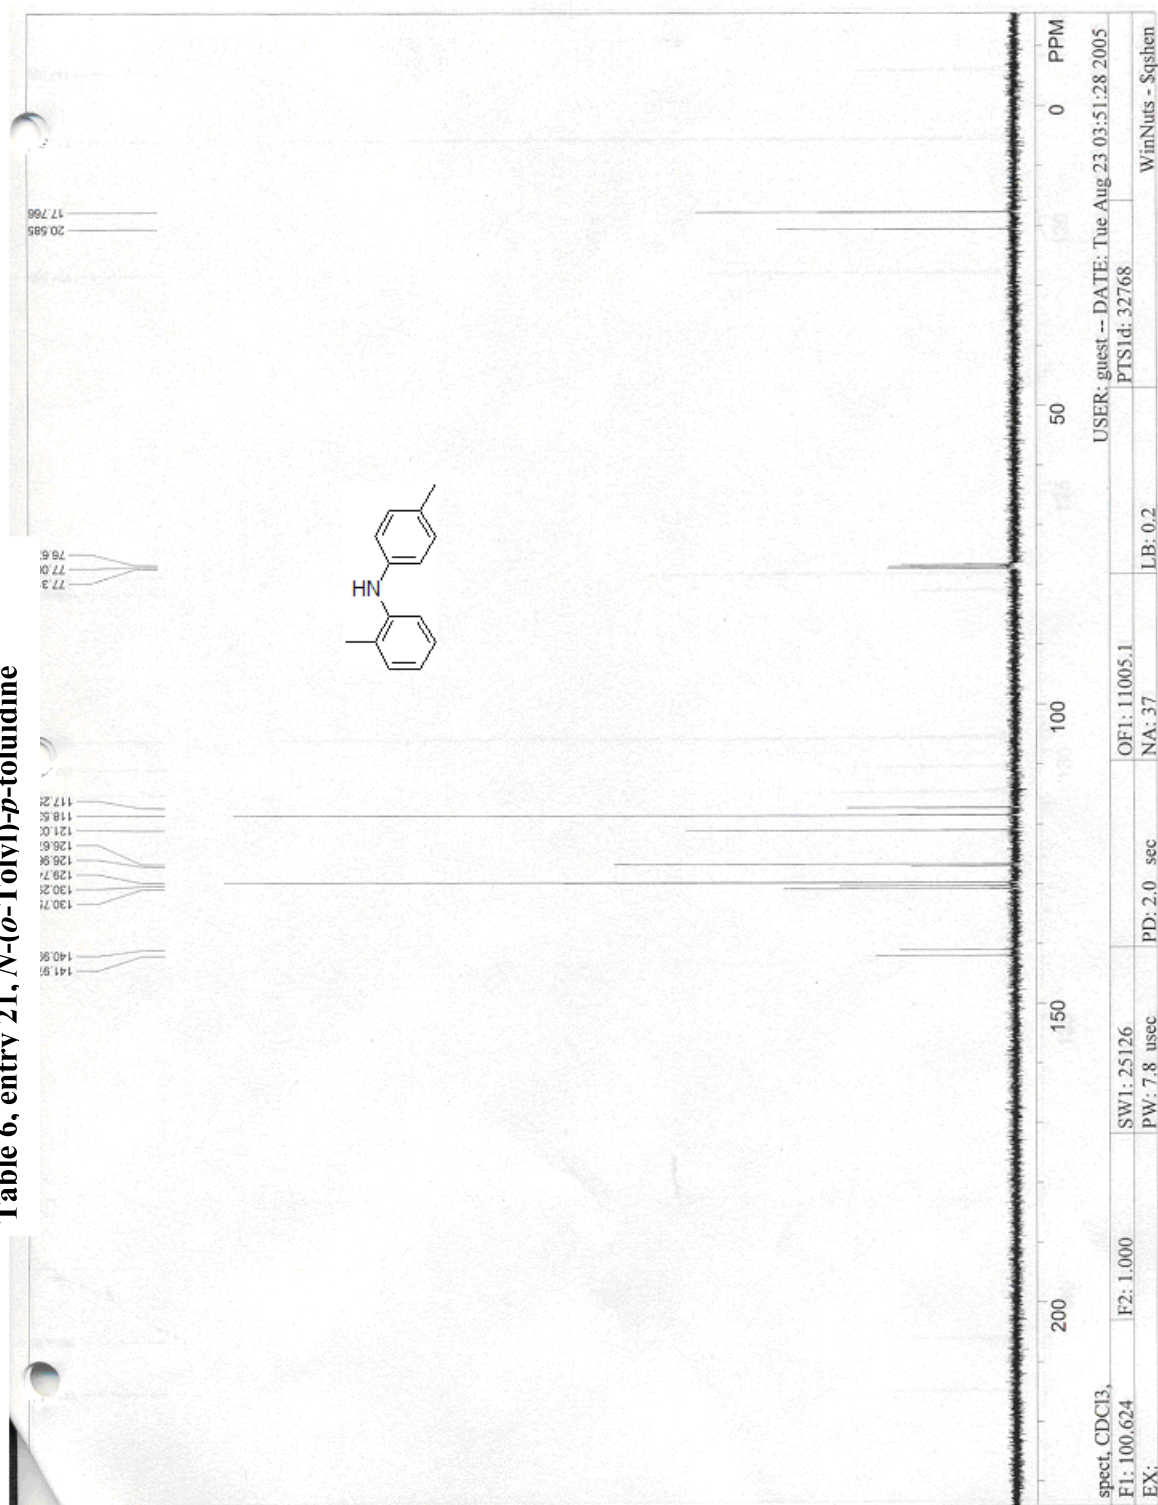

Table 6, entry 24, *N*-(*p*-Tolyl)-2-cyclohexylaniline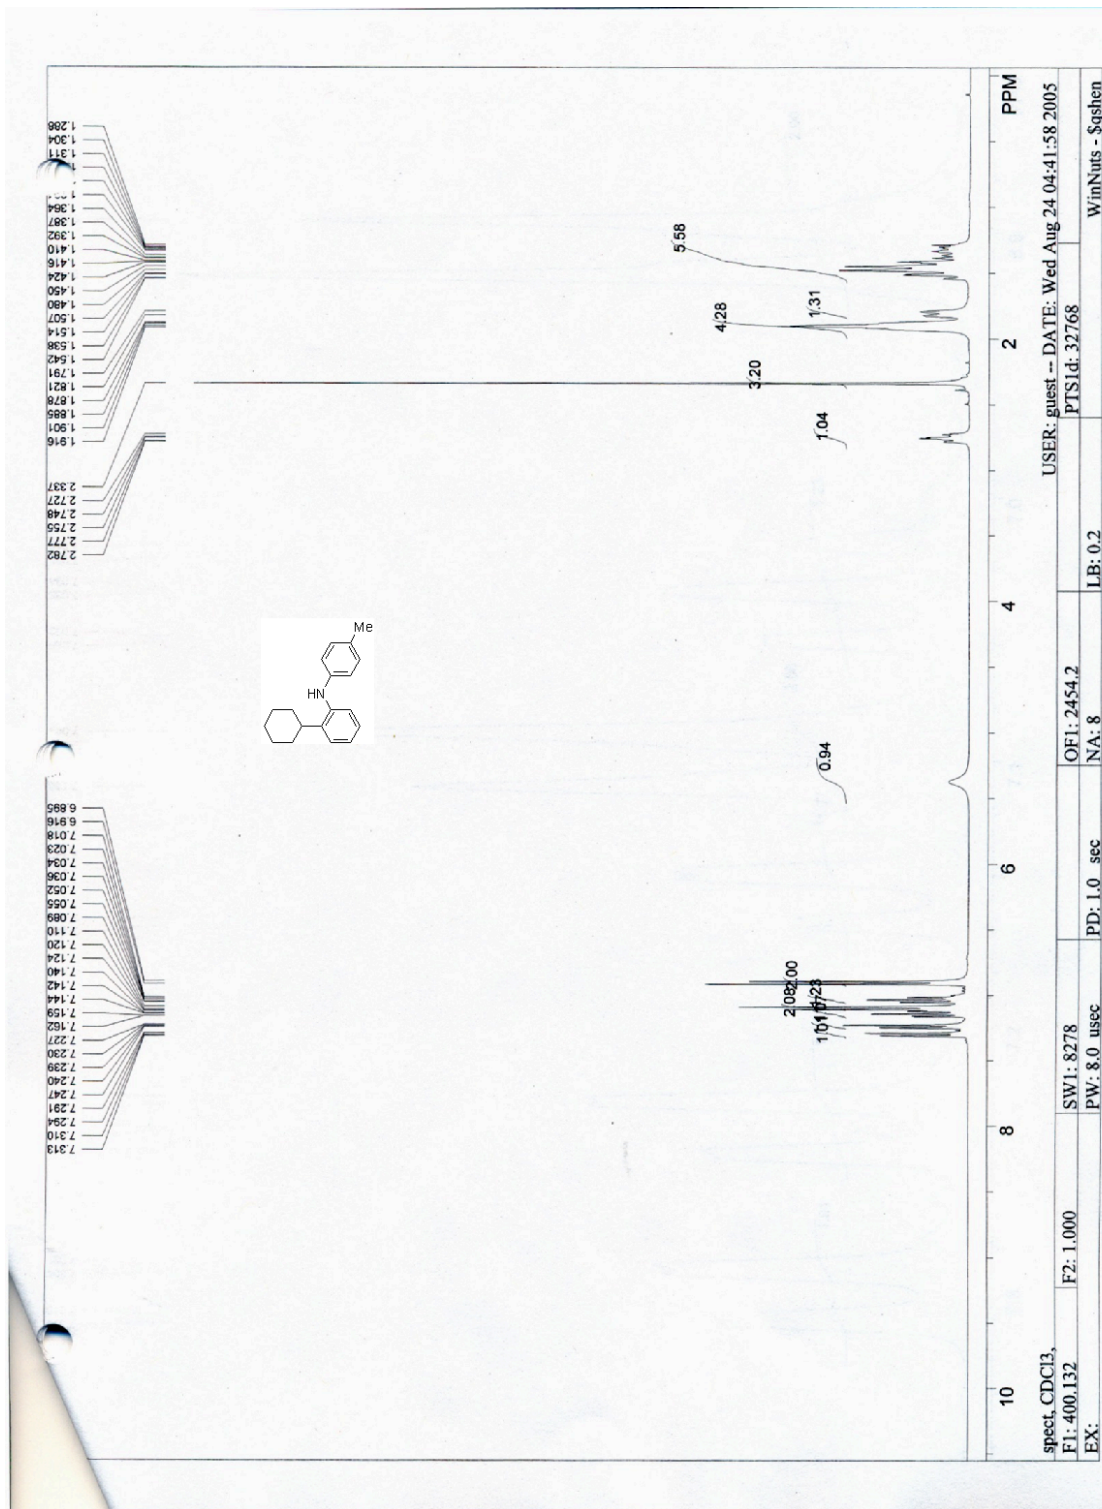

Table 6, entry 24, *N*-(*p*-Tolyl)-2-cyclohexylaniline

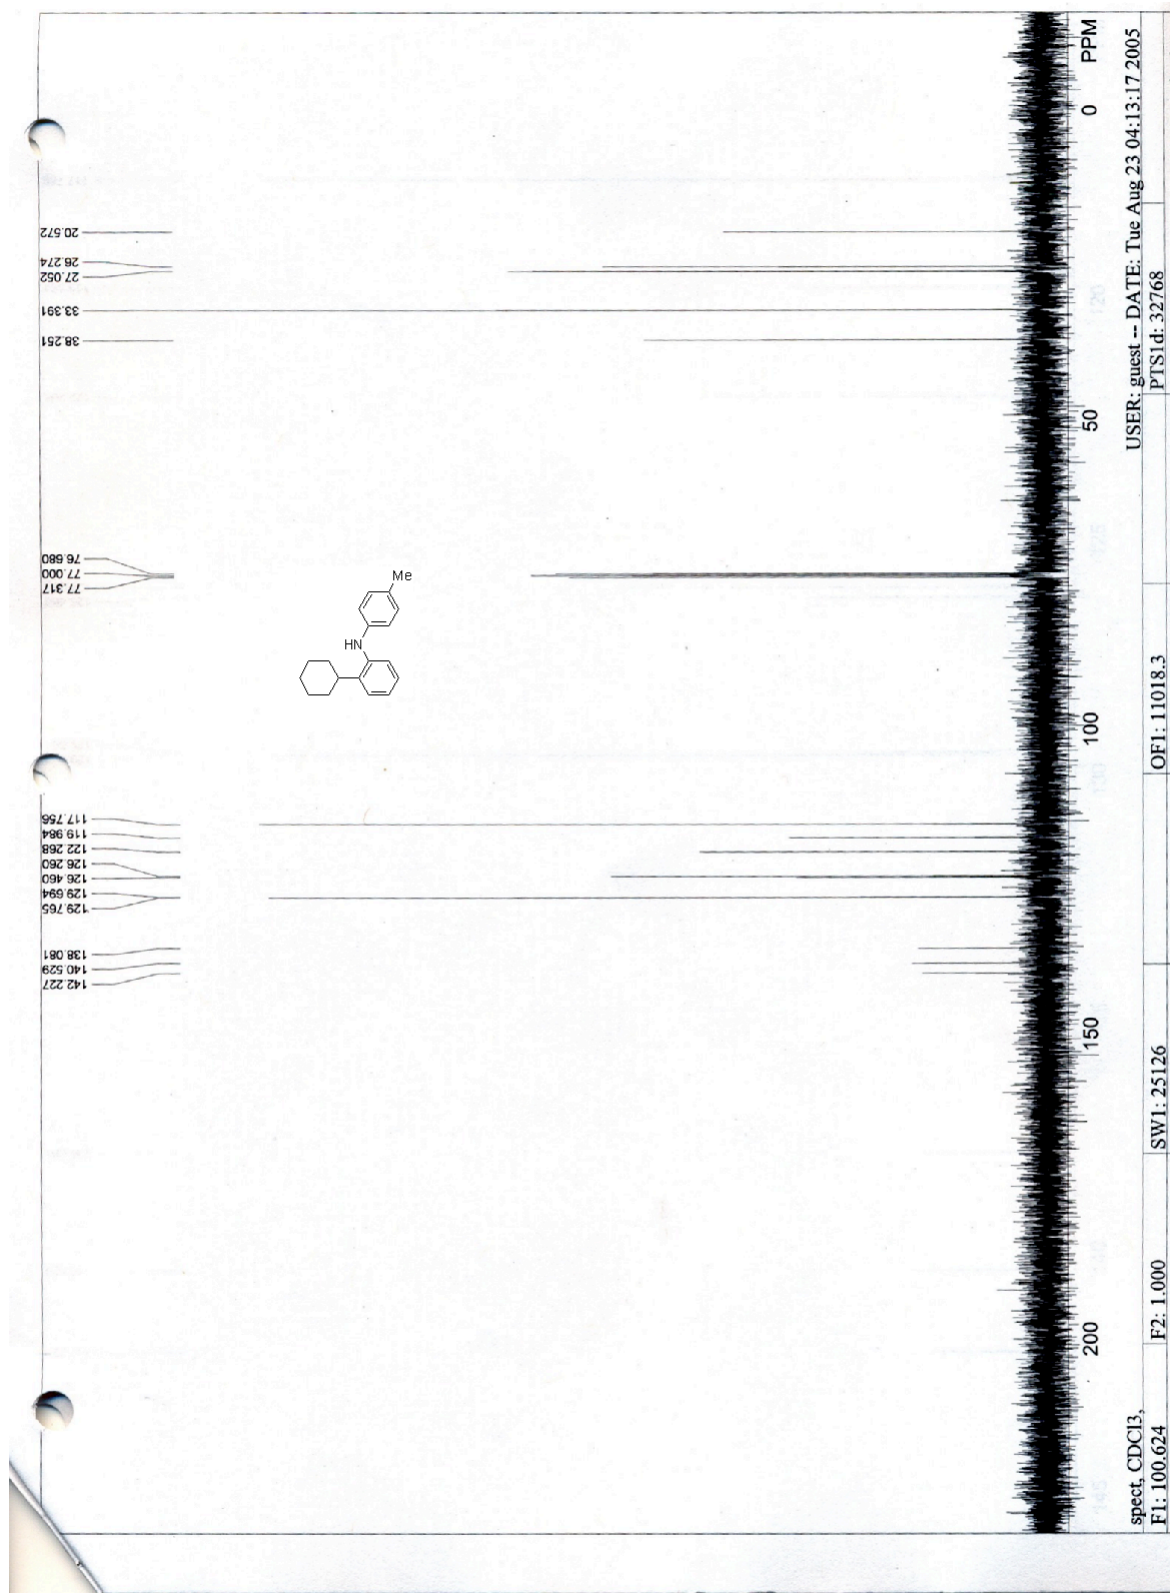

Table 7, entry 1, 2-(N-Methylamilino)pyridine

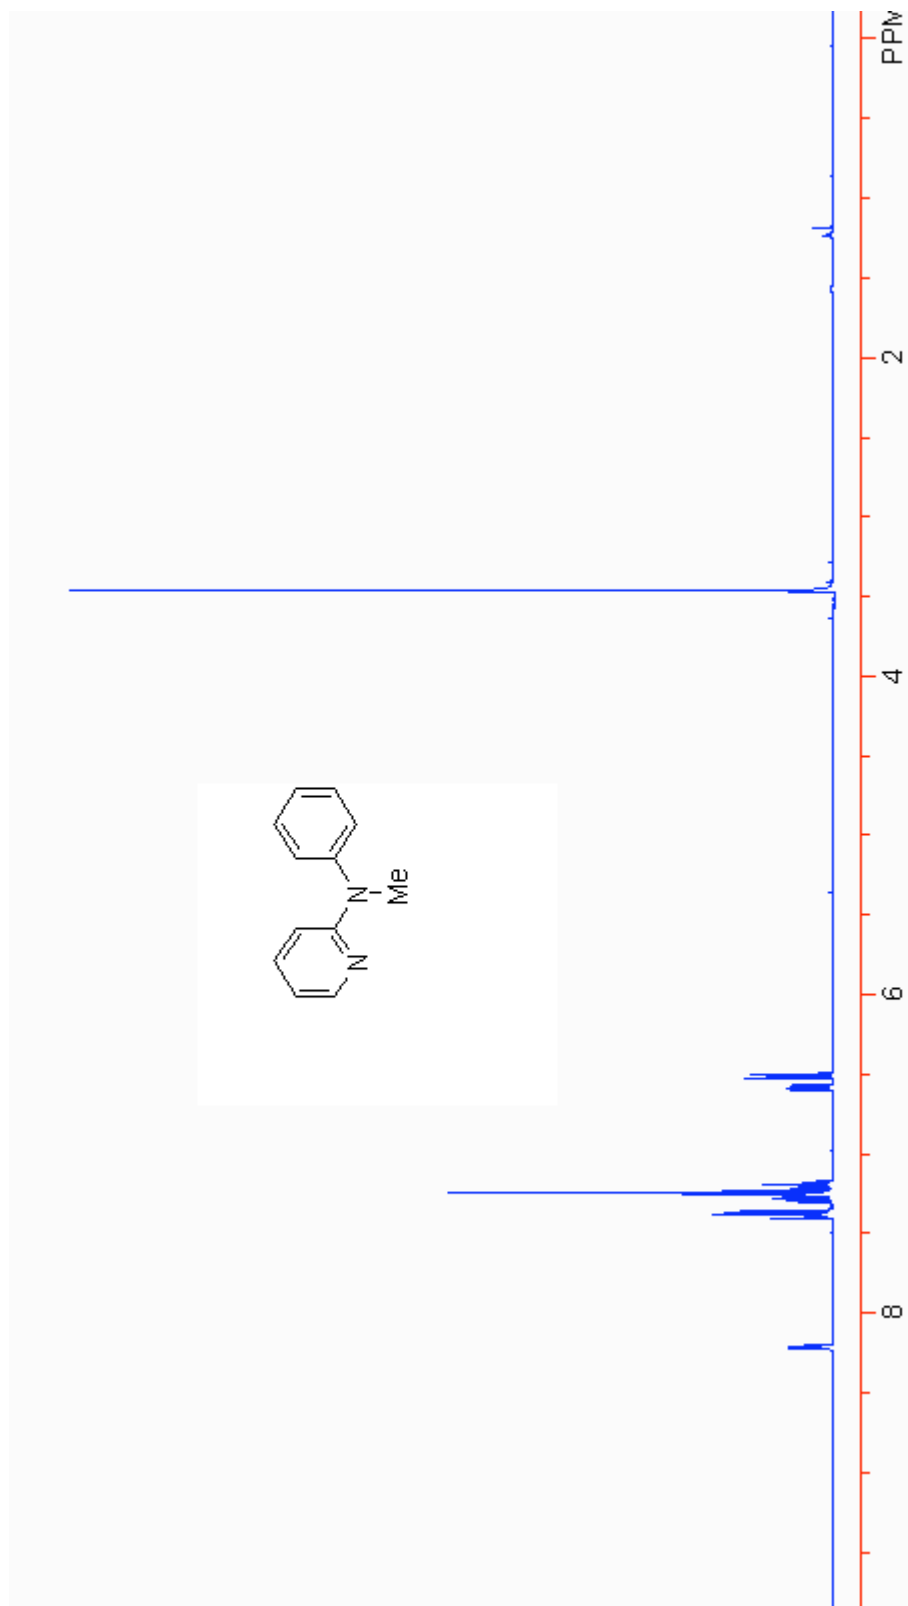

Table 7, entry 1, 2-(N-Methylamilino)pyridine

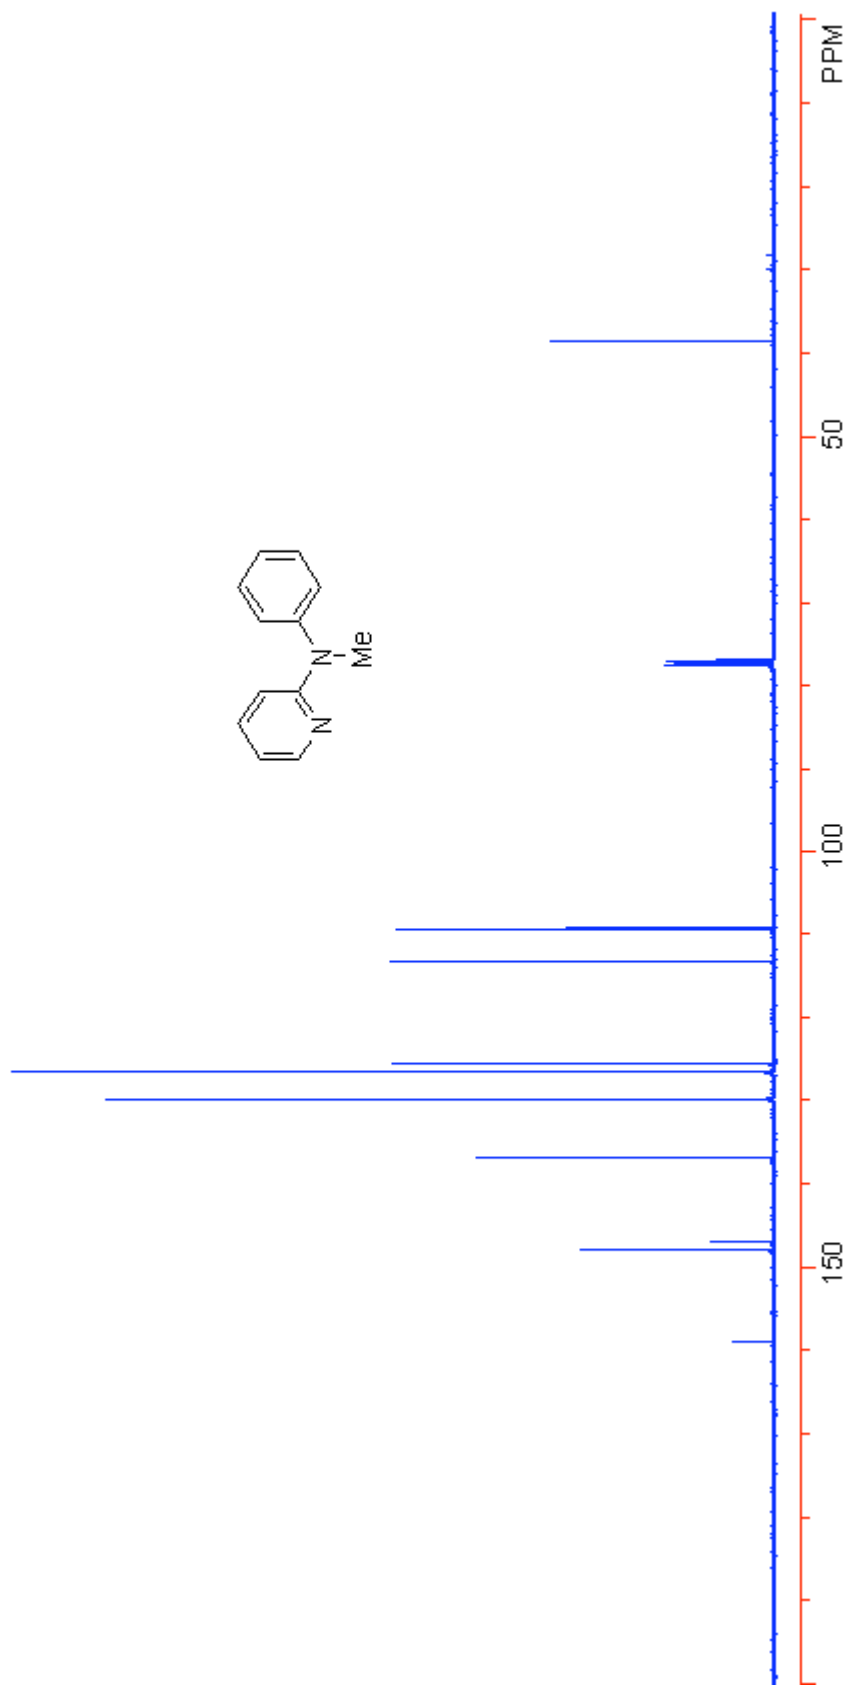

Table 7, entry 2, 3-Pyridylmorpholine

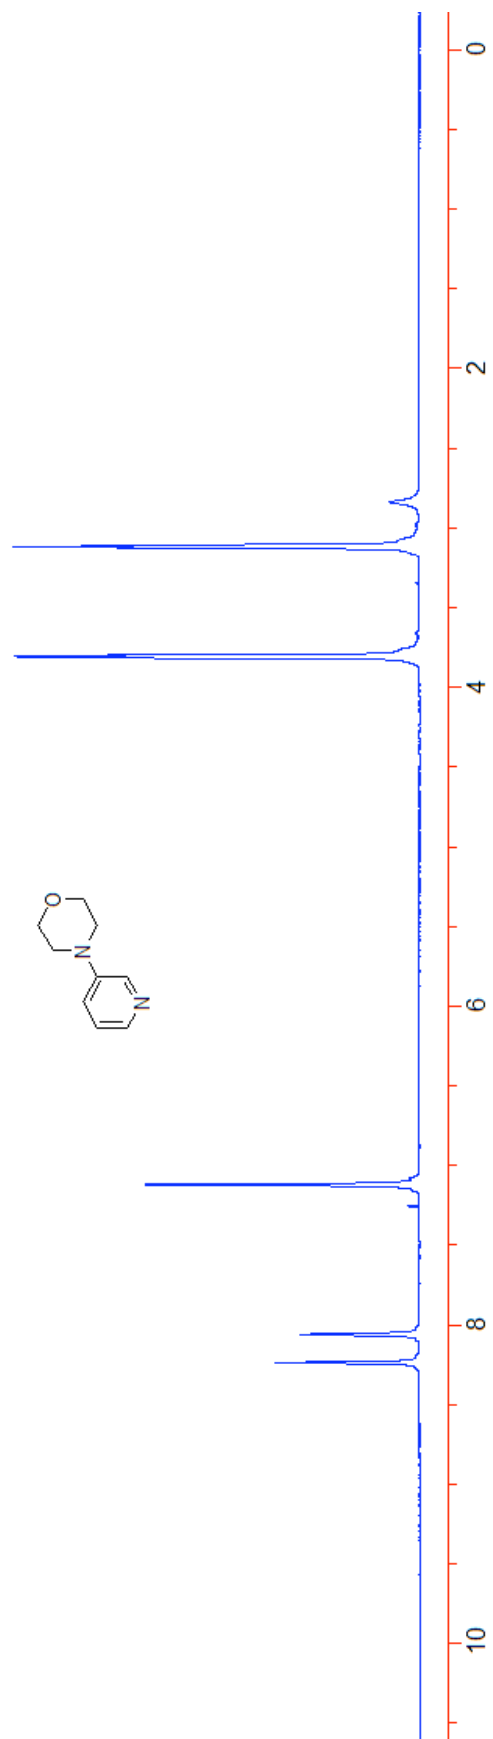

**Table 7, entry 2, 3-Pyridyl/morpholine**

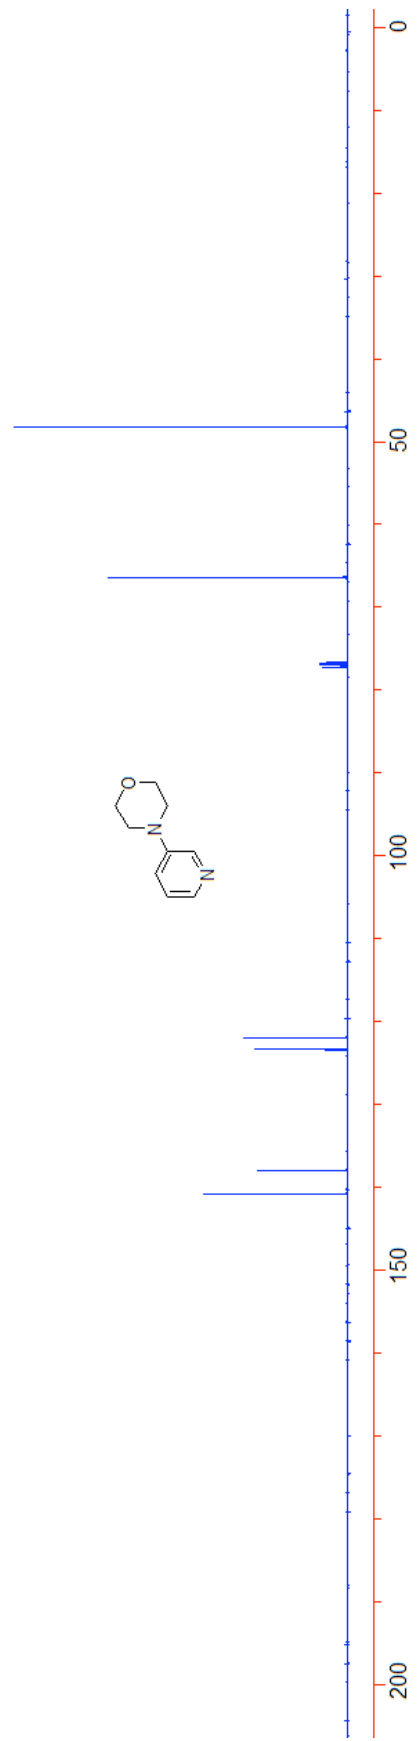

Table 7, entry 5, *N*-Methyldiphenylamine

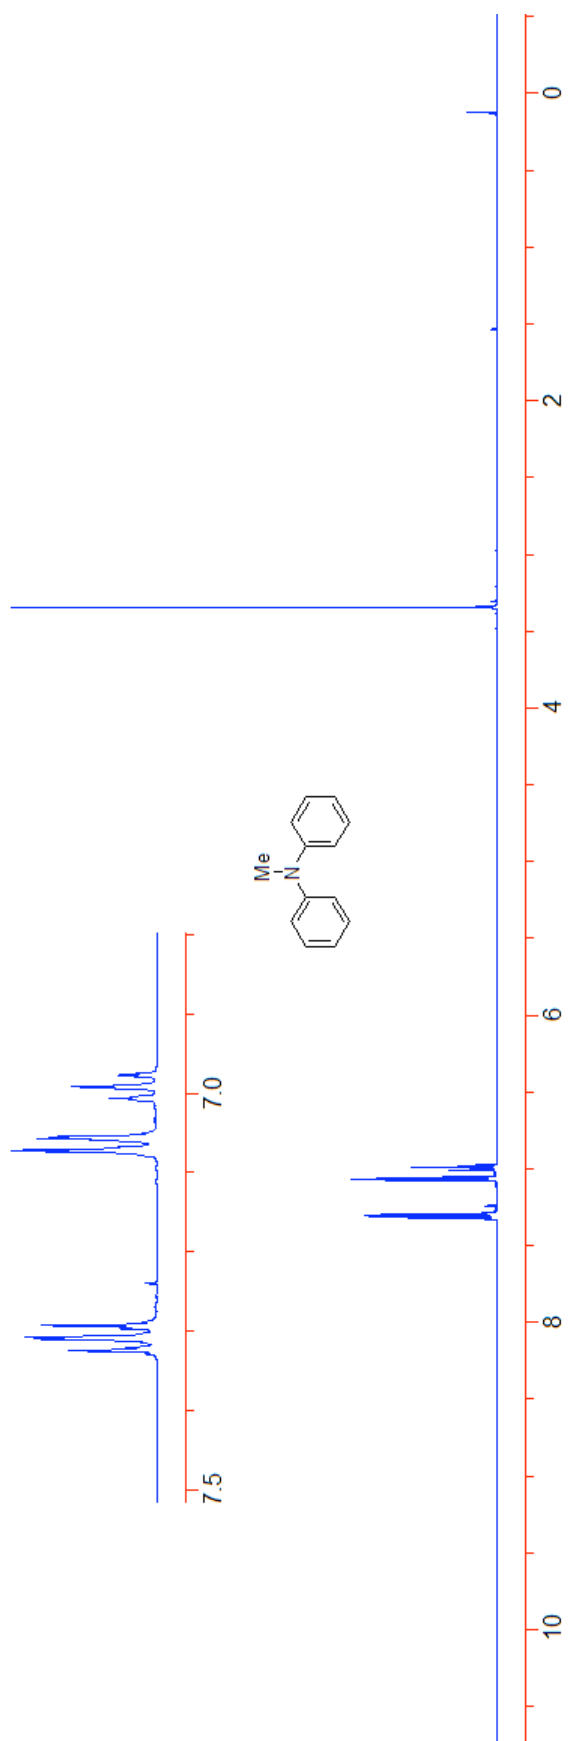



Table 7, entry 5, *N*-Methyldiphenylamine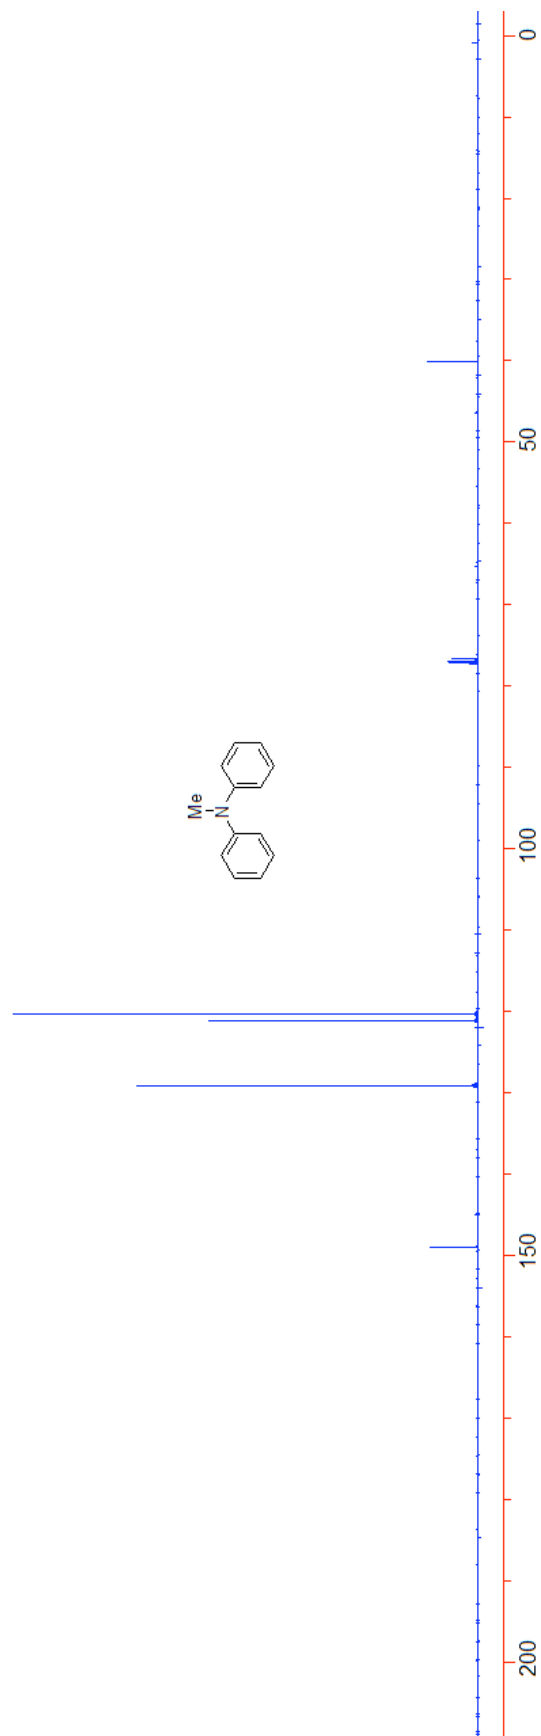

Table 7, entry 6, *N,N*-Di-butylaniline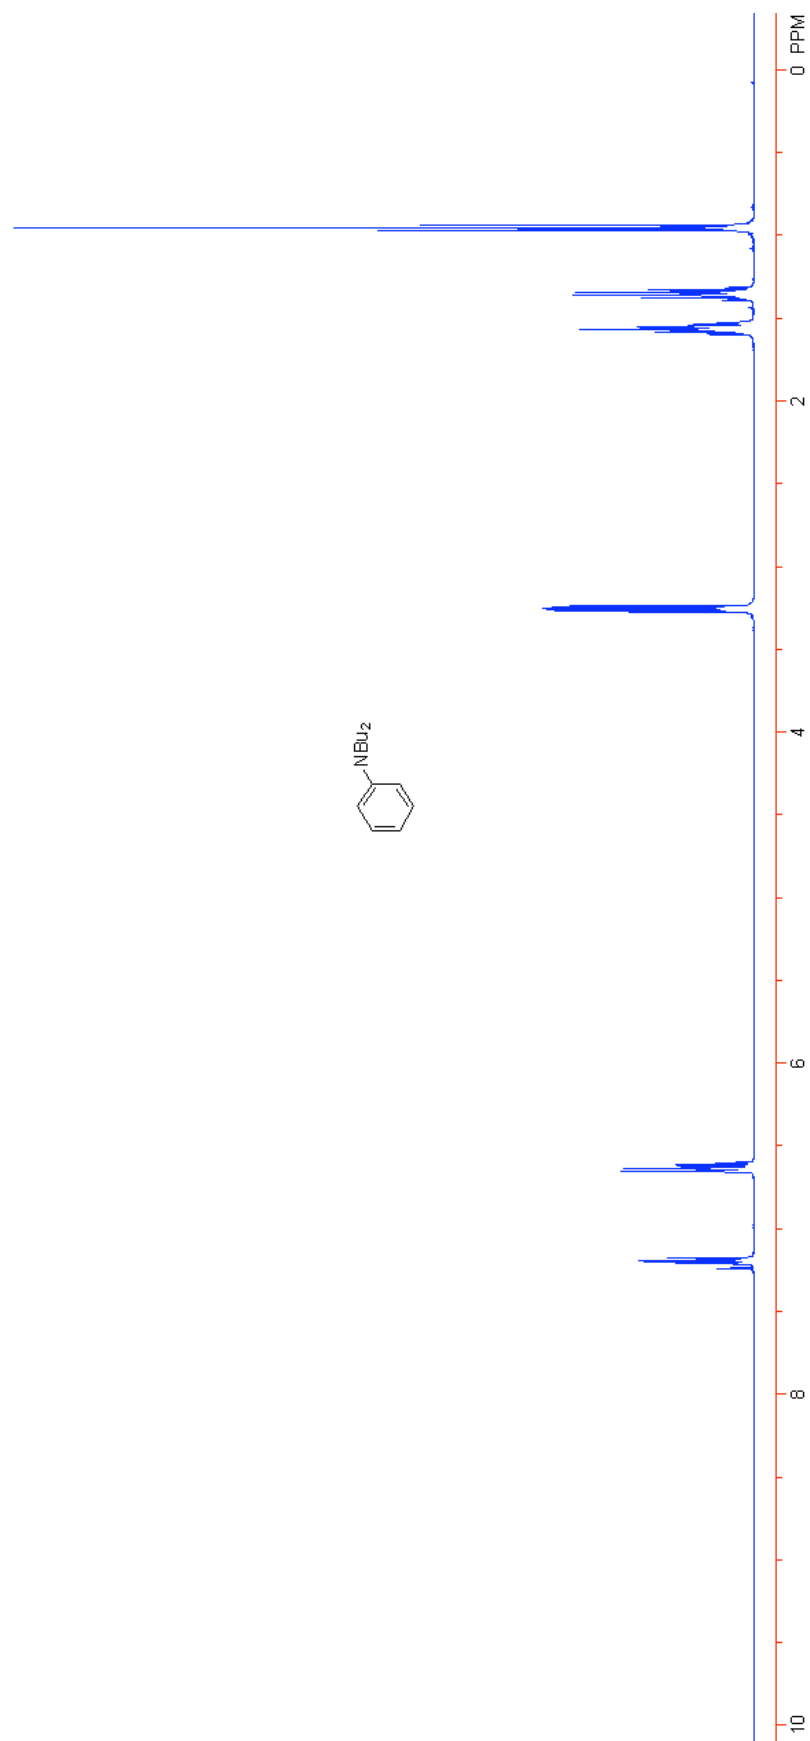

Table 7, entry 6, *N,N*-Di-butylaniline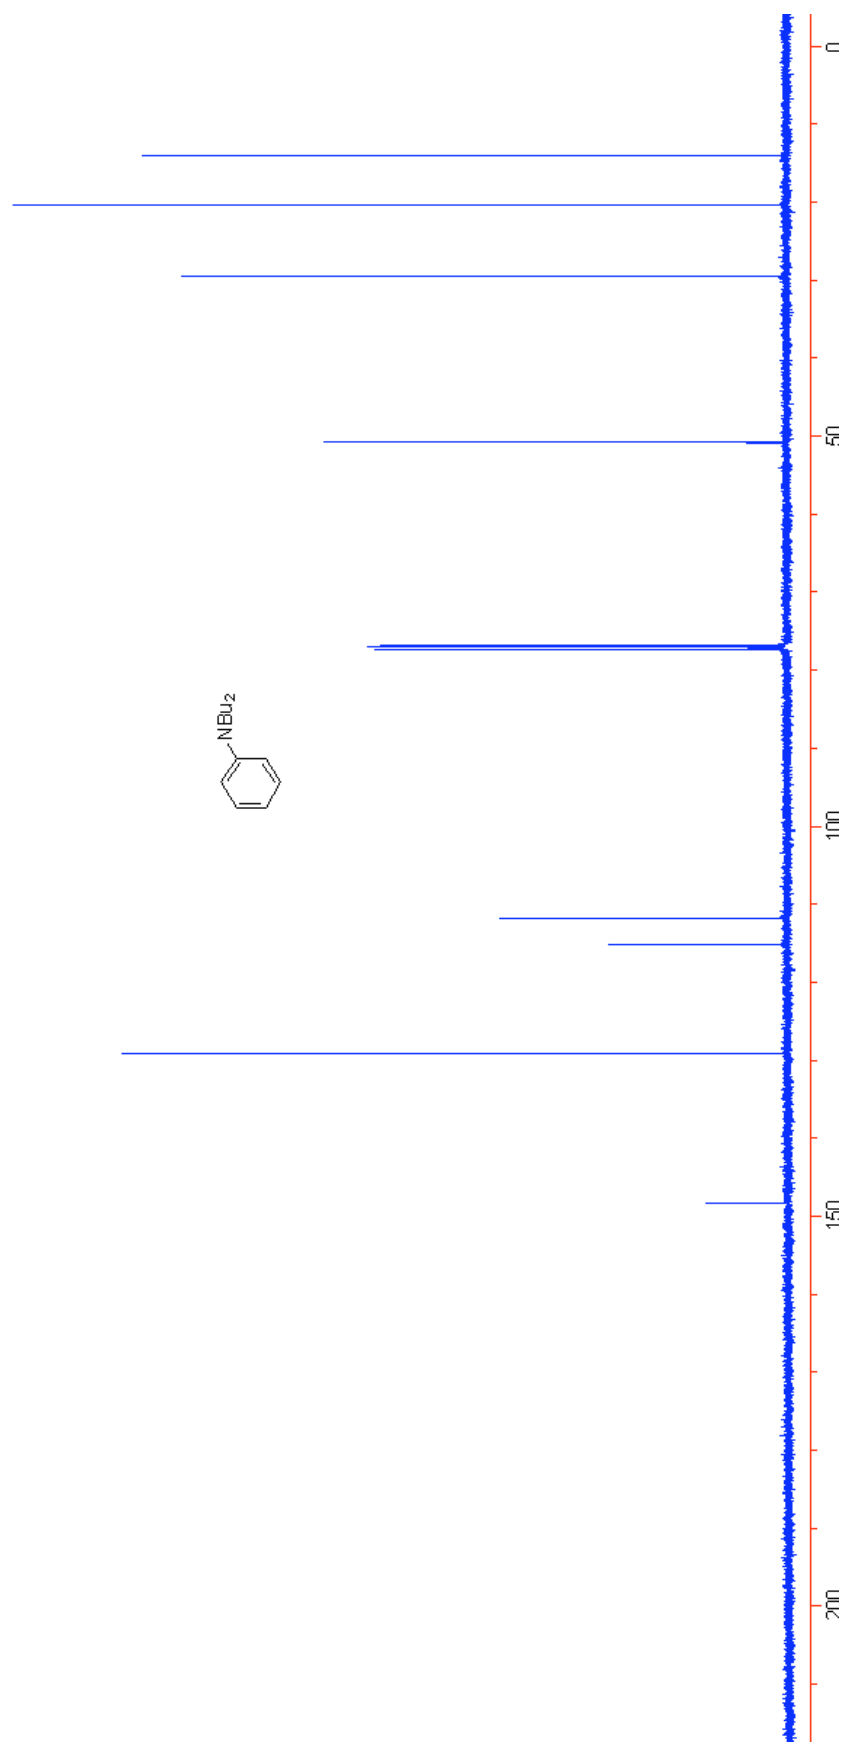

Table 7, entry 7, Triphenylamine

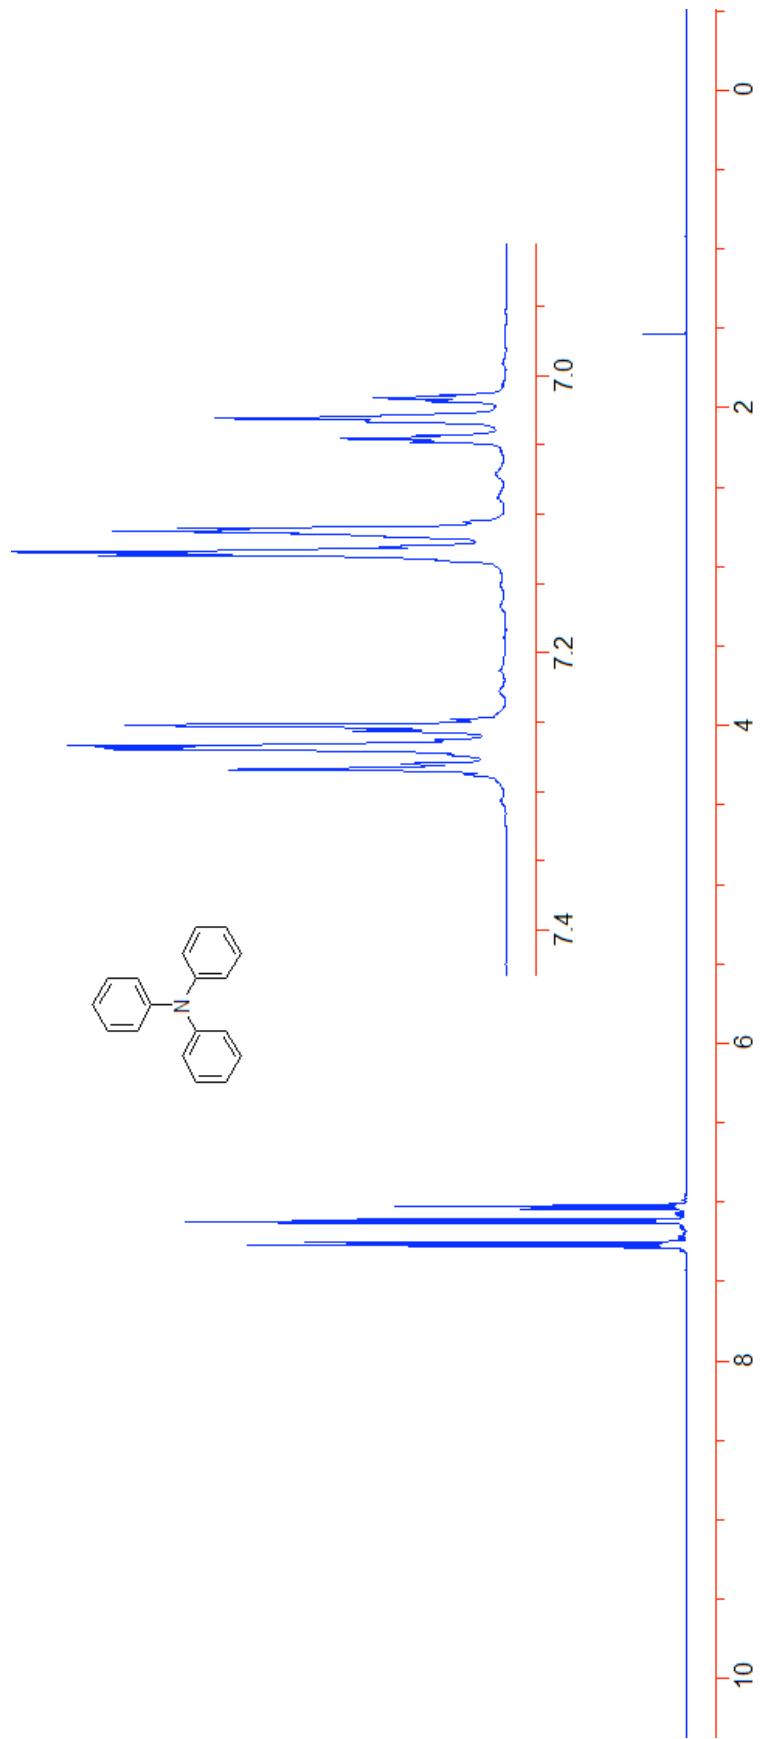

Table 7, entry 7, Triphenylamine

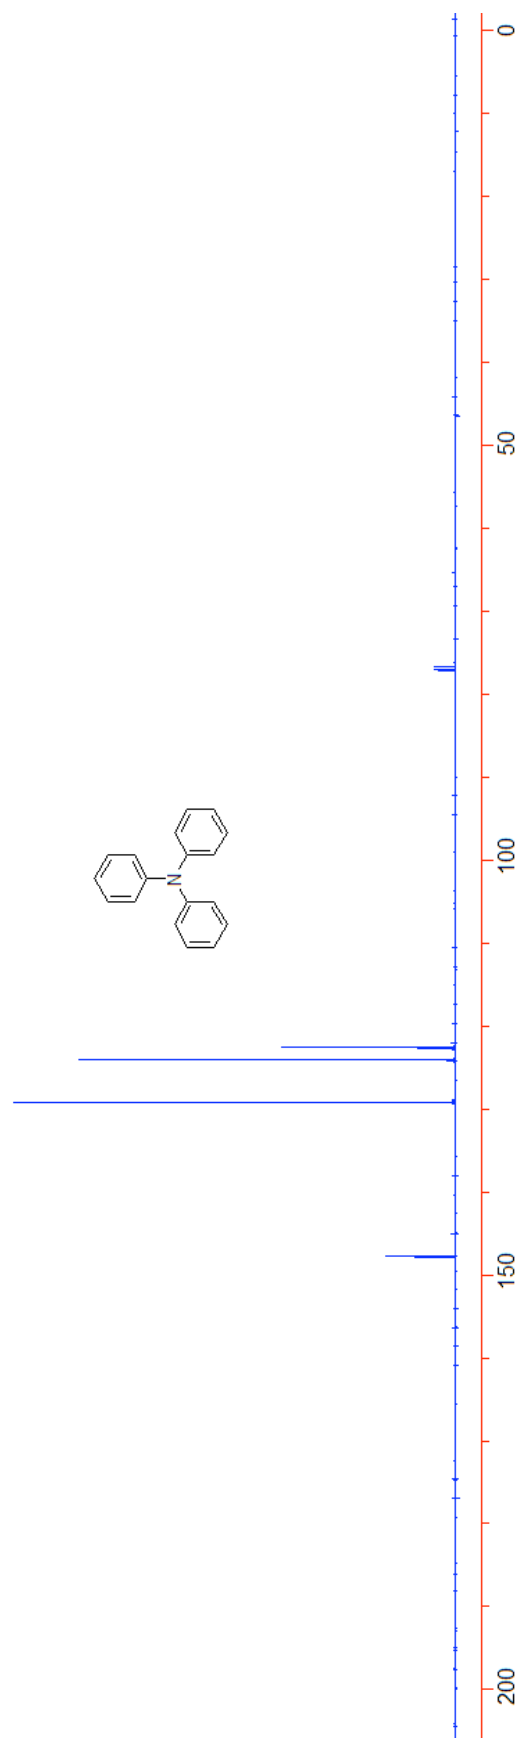

Table 18, entry 8, *p*-Tolylmorpholine

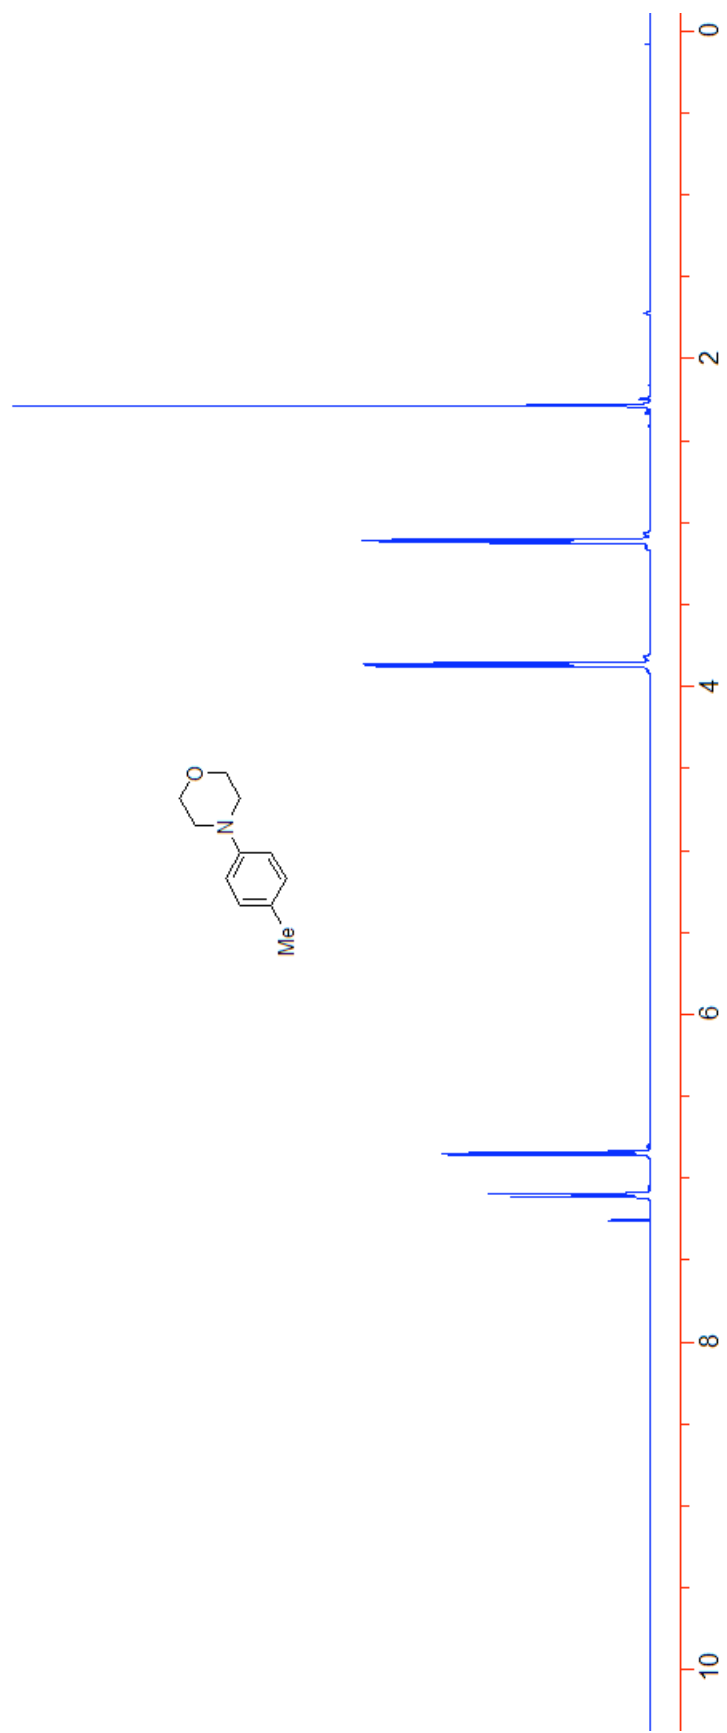

Table 18, entry 8, *p*-Tolylmorpholine

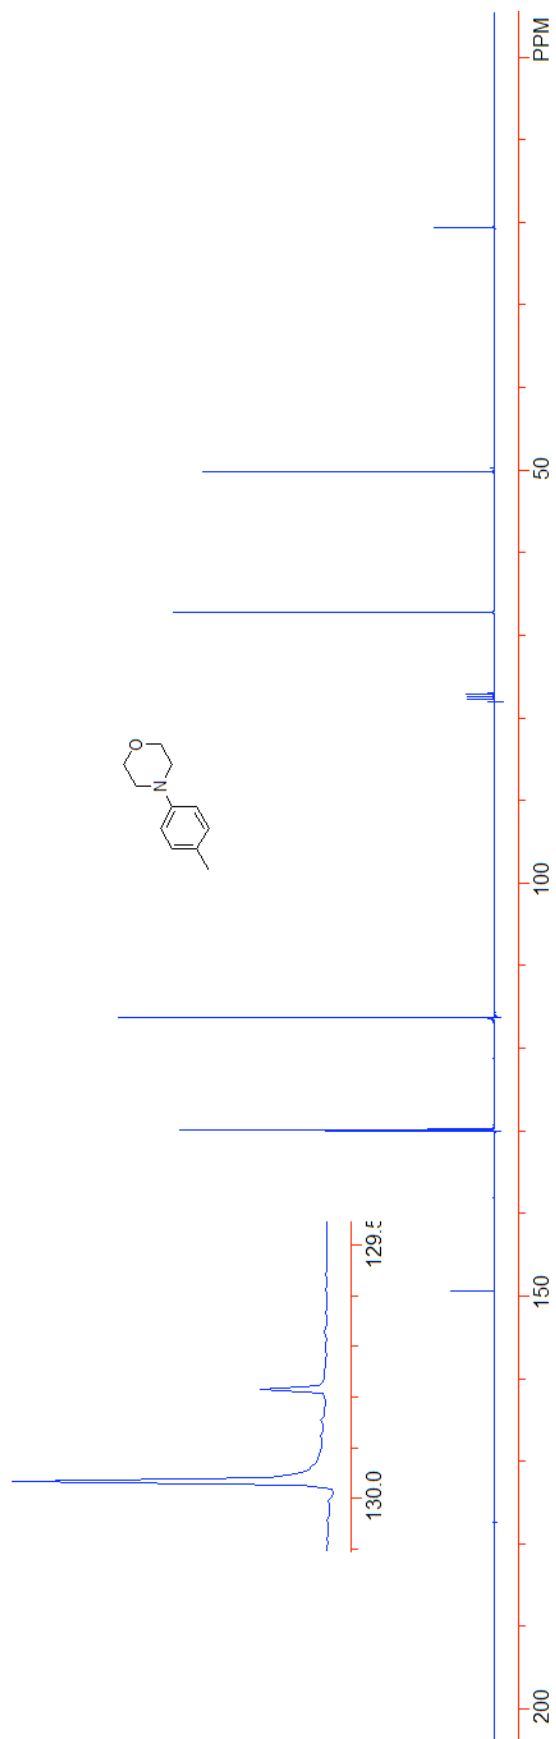

Table 7, entry 9, *N*-(3-Methoxyphenyl)-morpholine

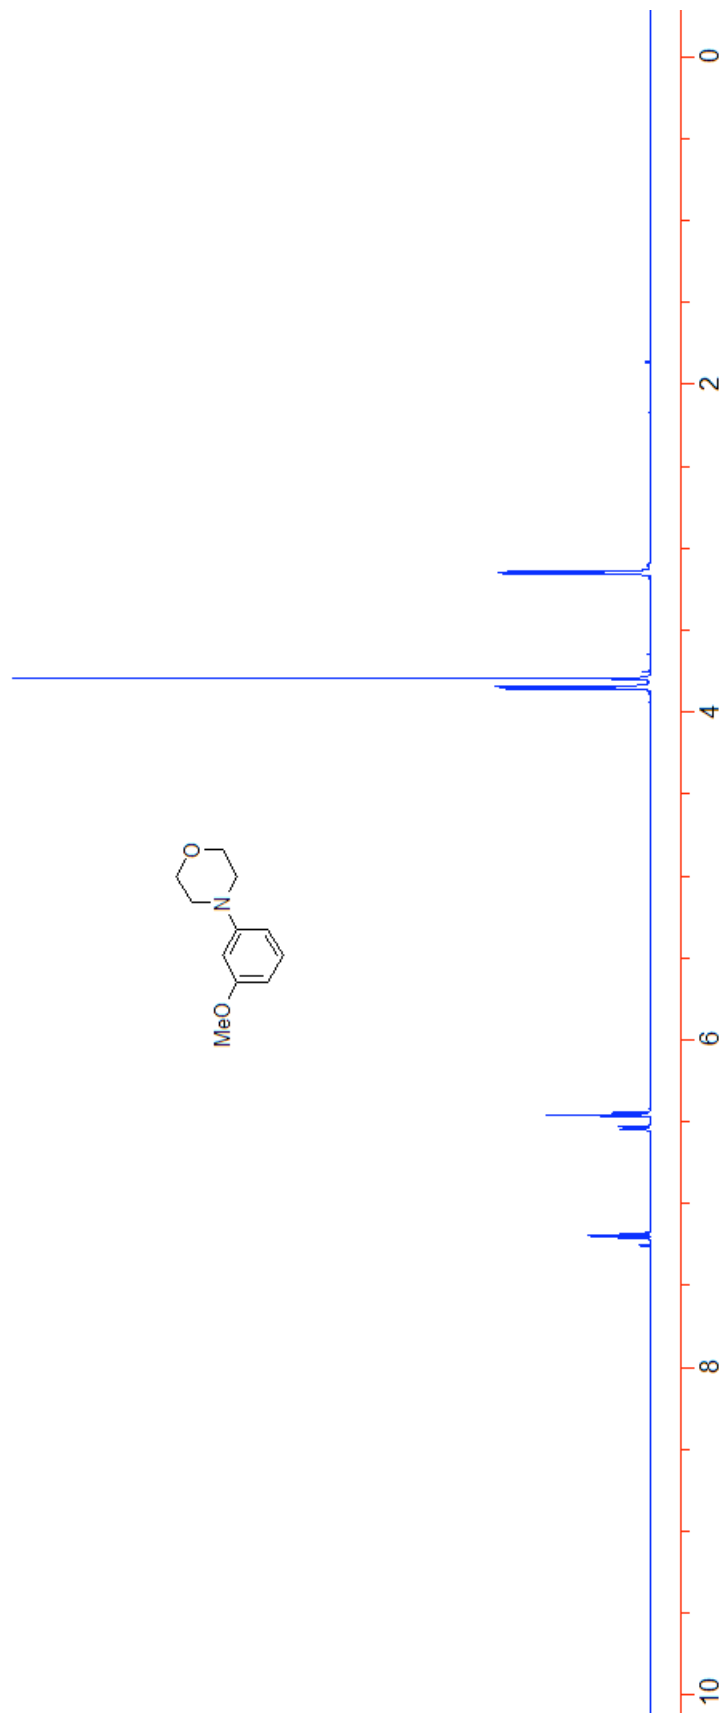



**Table 7, entry 9, *N*-(3-Methoxyphenyl)-morpholine**

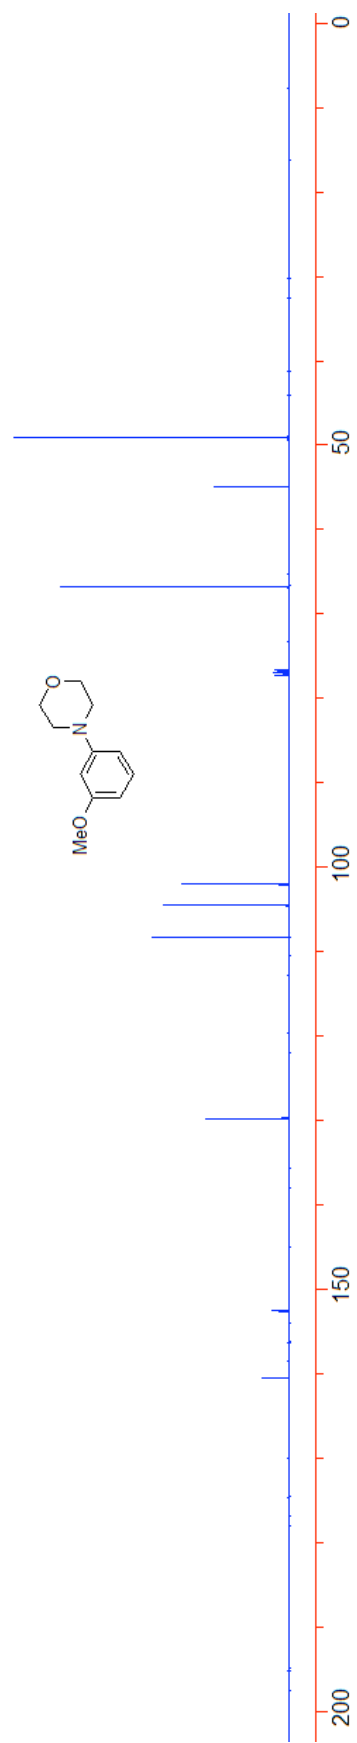

Table 8, entry 2, 2-Acetamido-5-*N*-*sec*-butylaminopyridine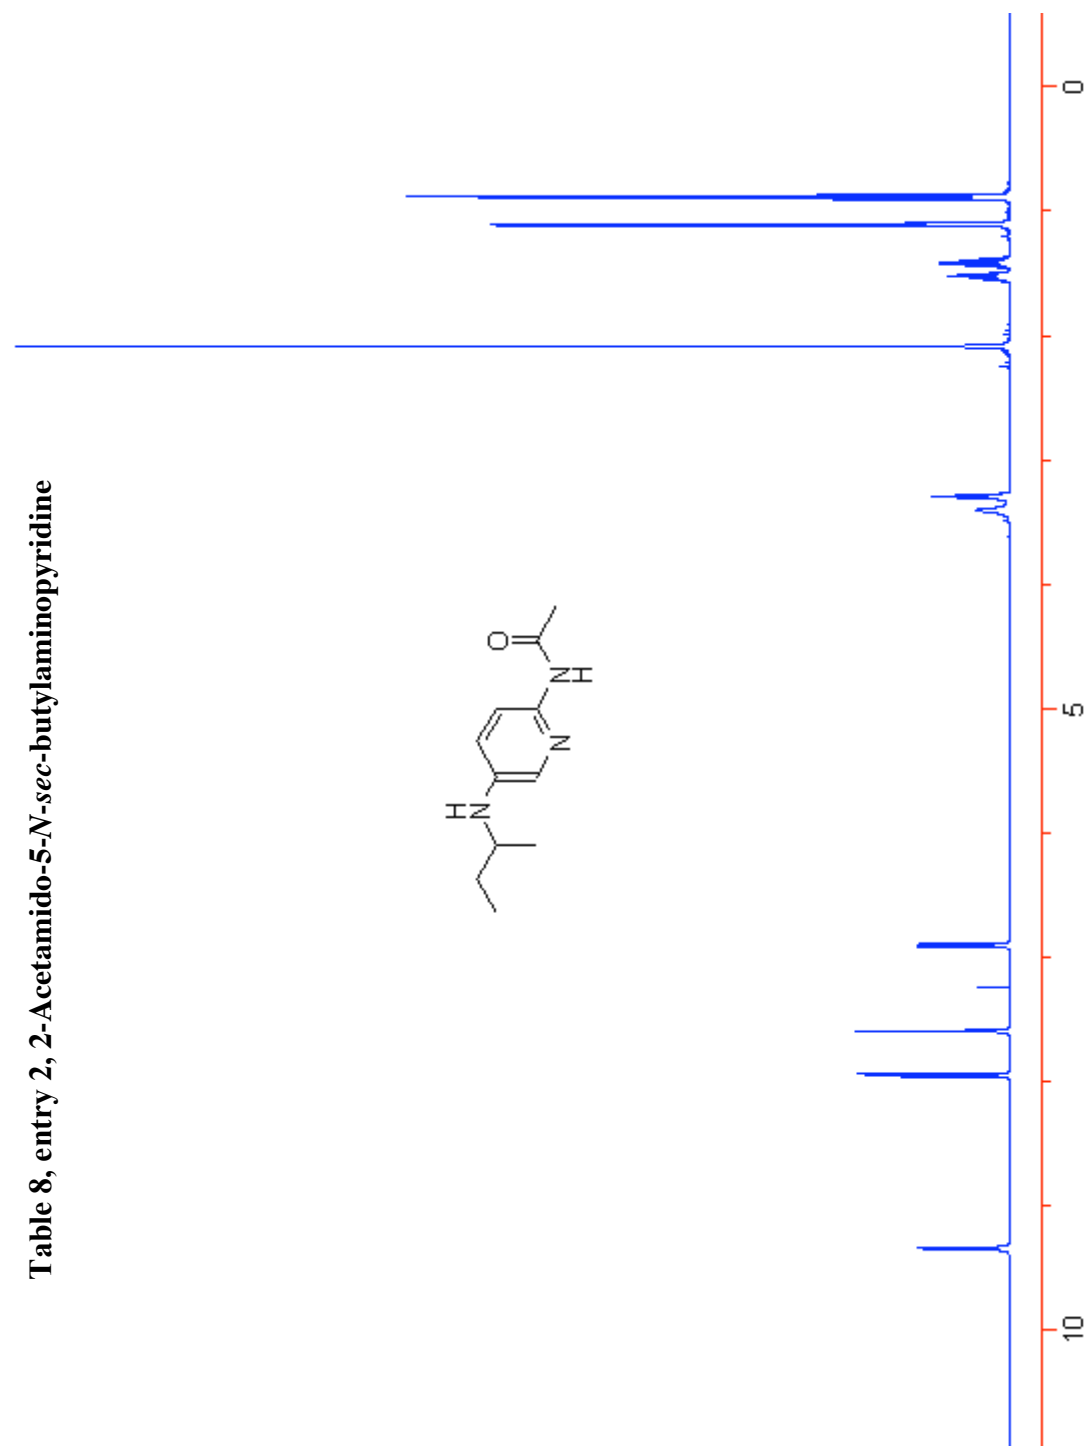

Table 8, entry 2, 2-Acetamido-5-*N*-*sec*-butylaminopyridine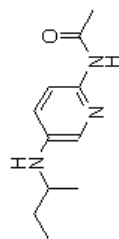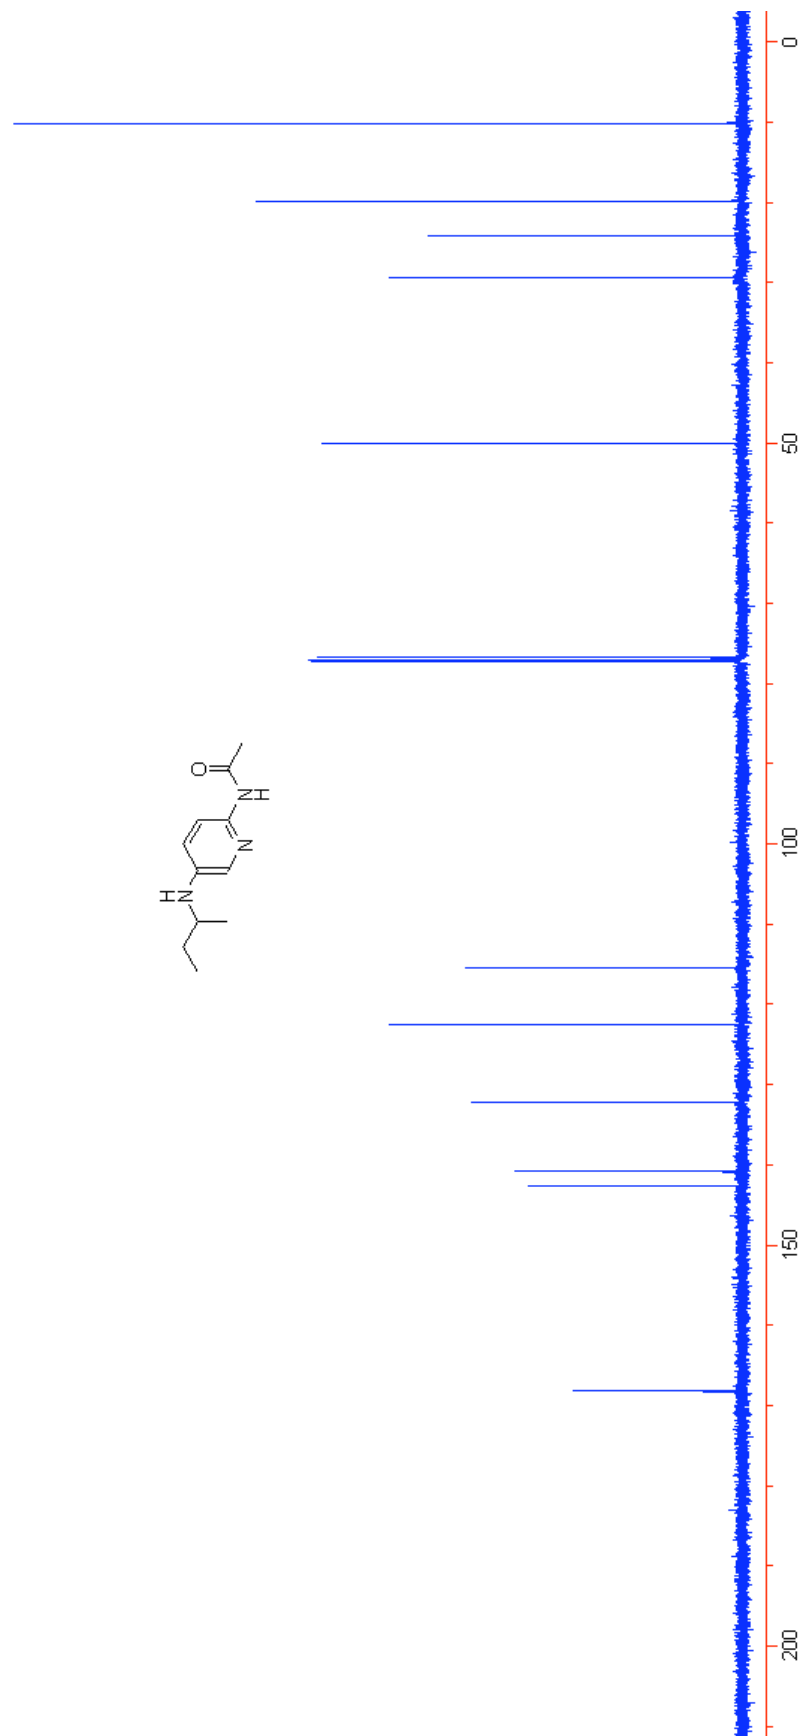

Table 8, entry 3, 5-Acetamido-2-N-benzylaminopyridine

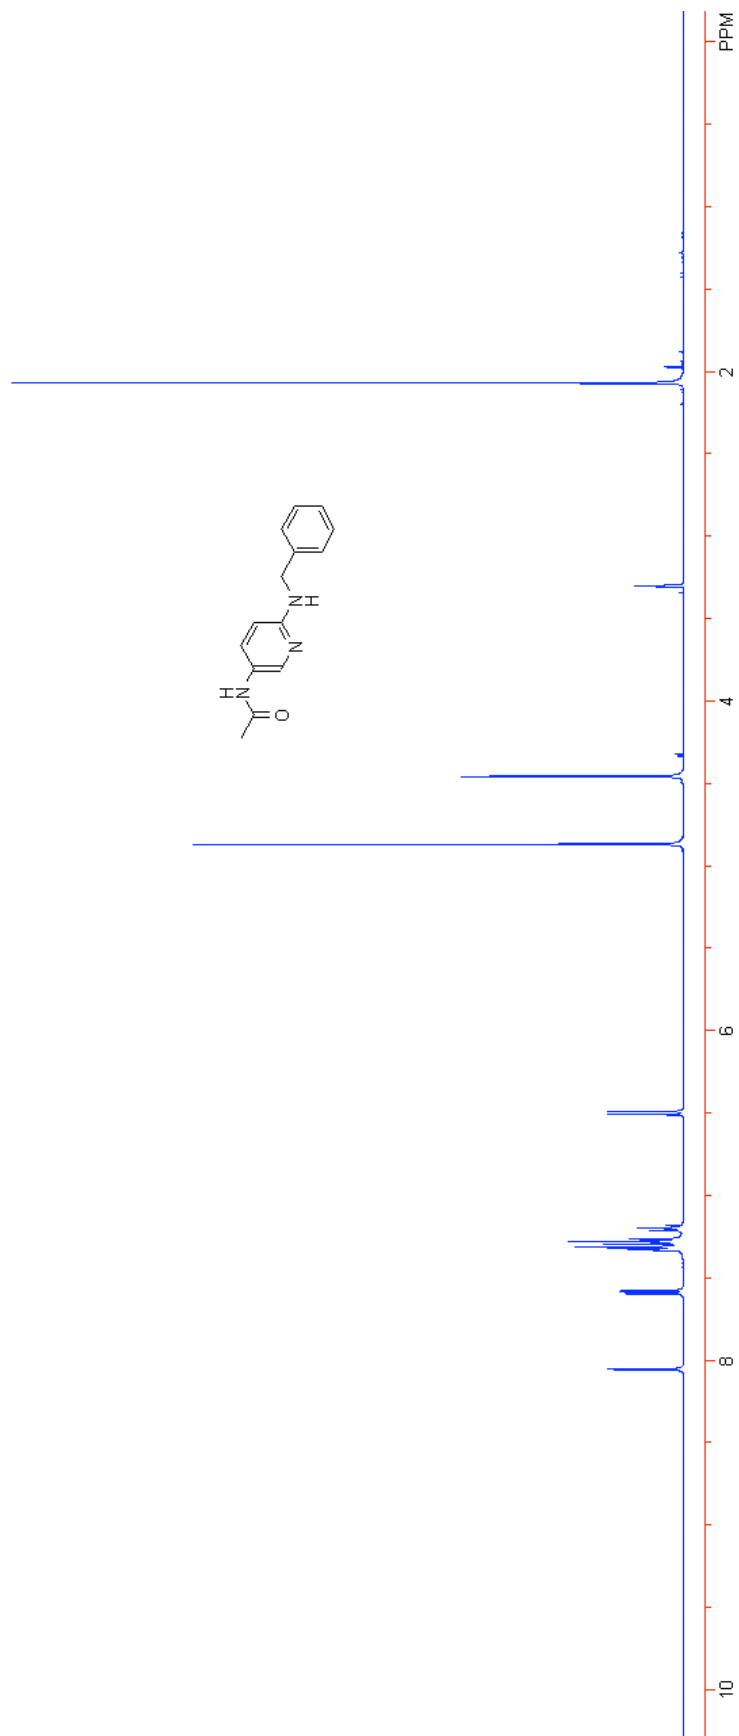

Table 8, entry 3, 5-Acetamido-2-N-benzylaminopyridine

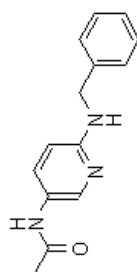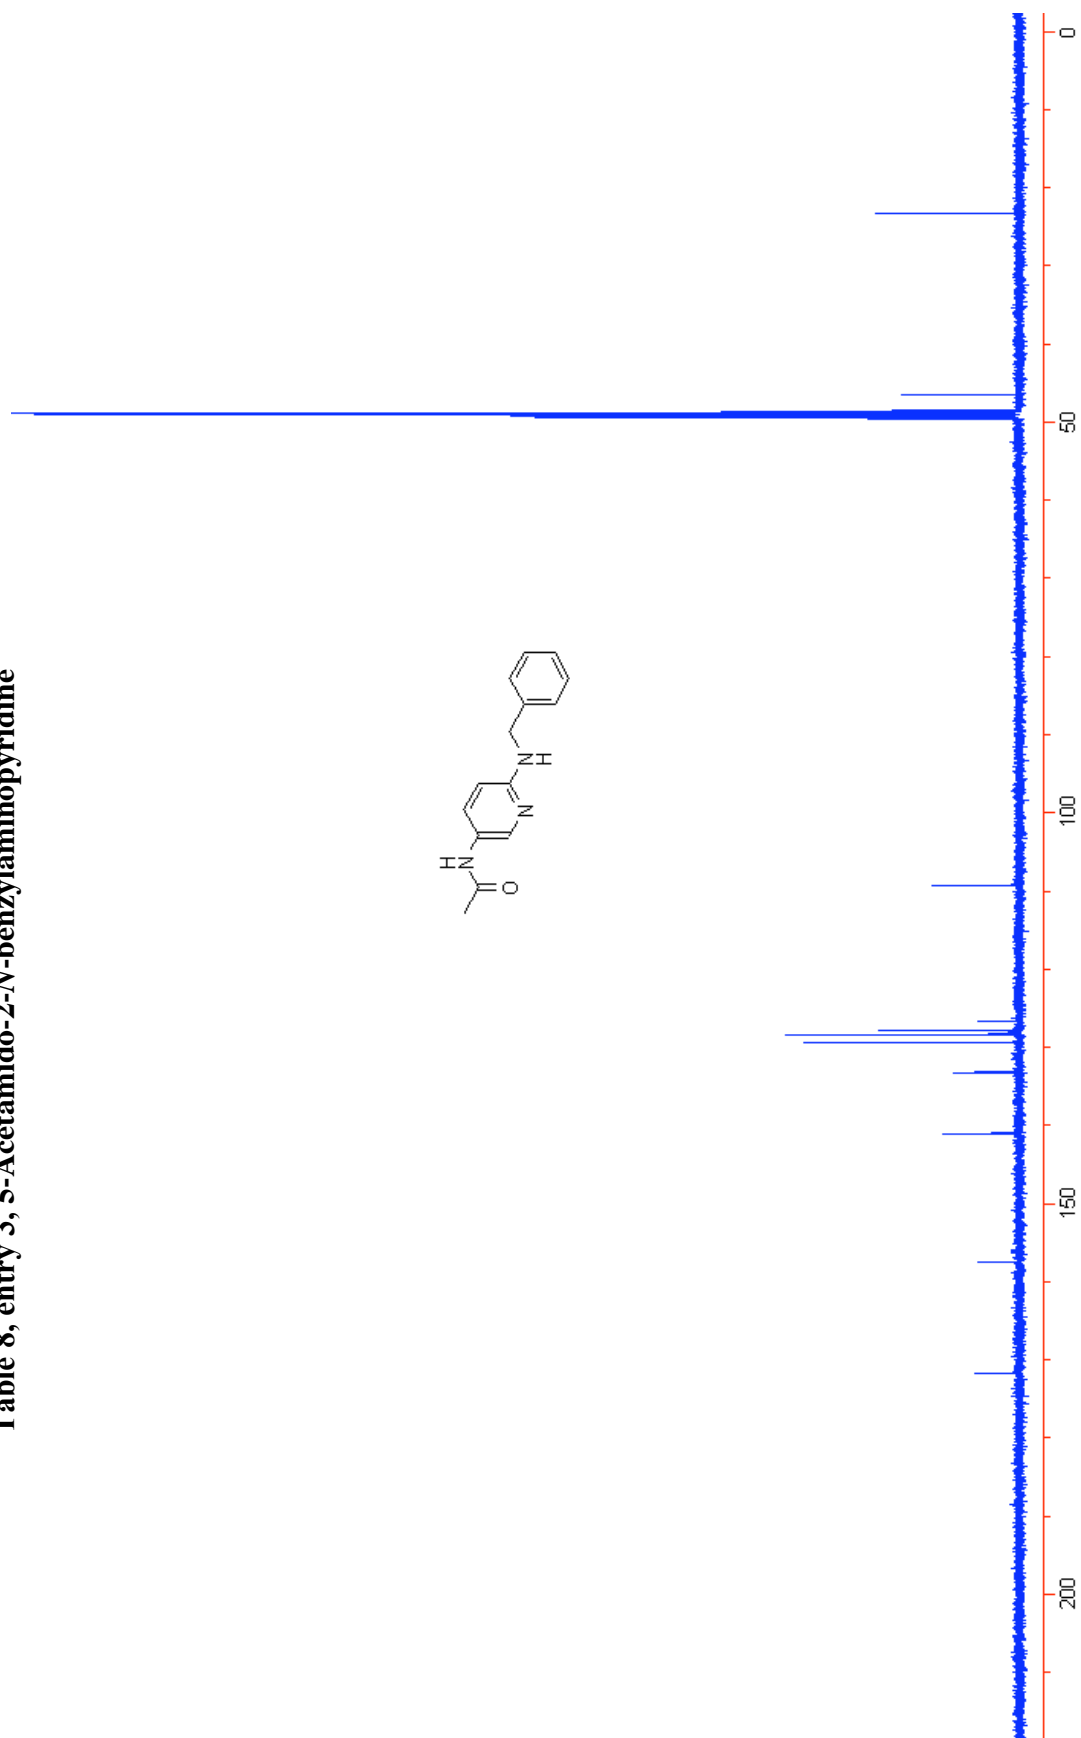

Table 8, entry 4, 5-Acetamido-2-*N*-iso-butylaminopyridine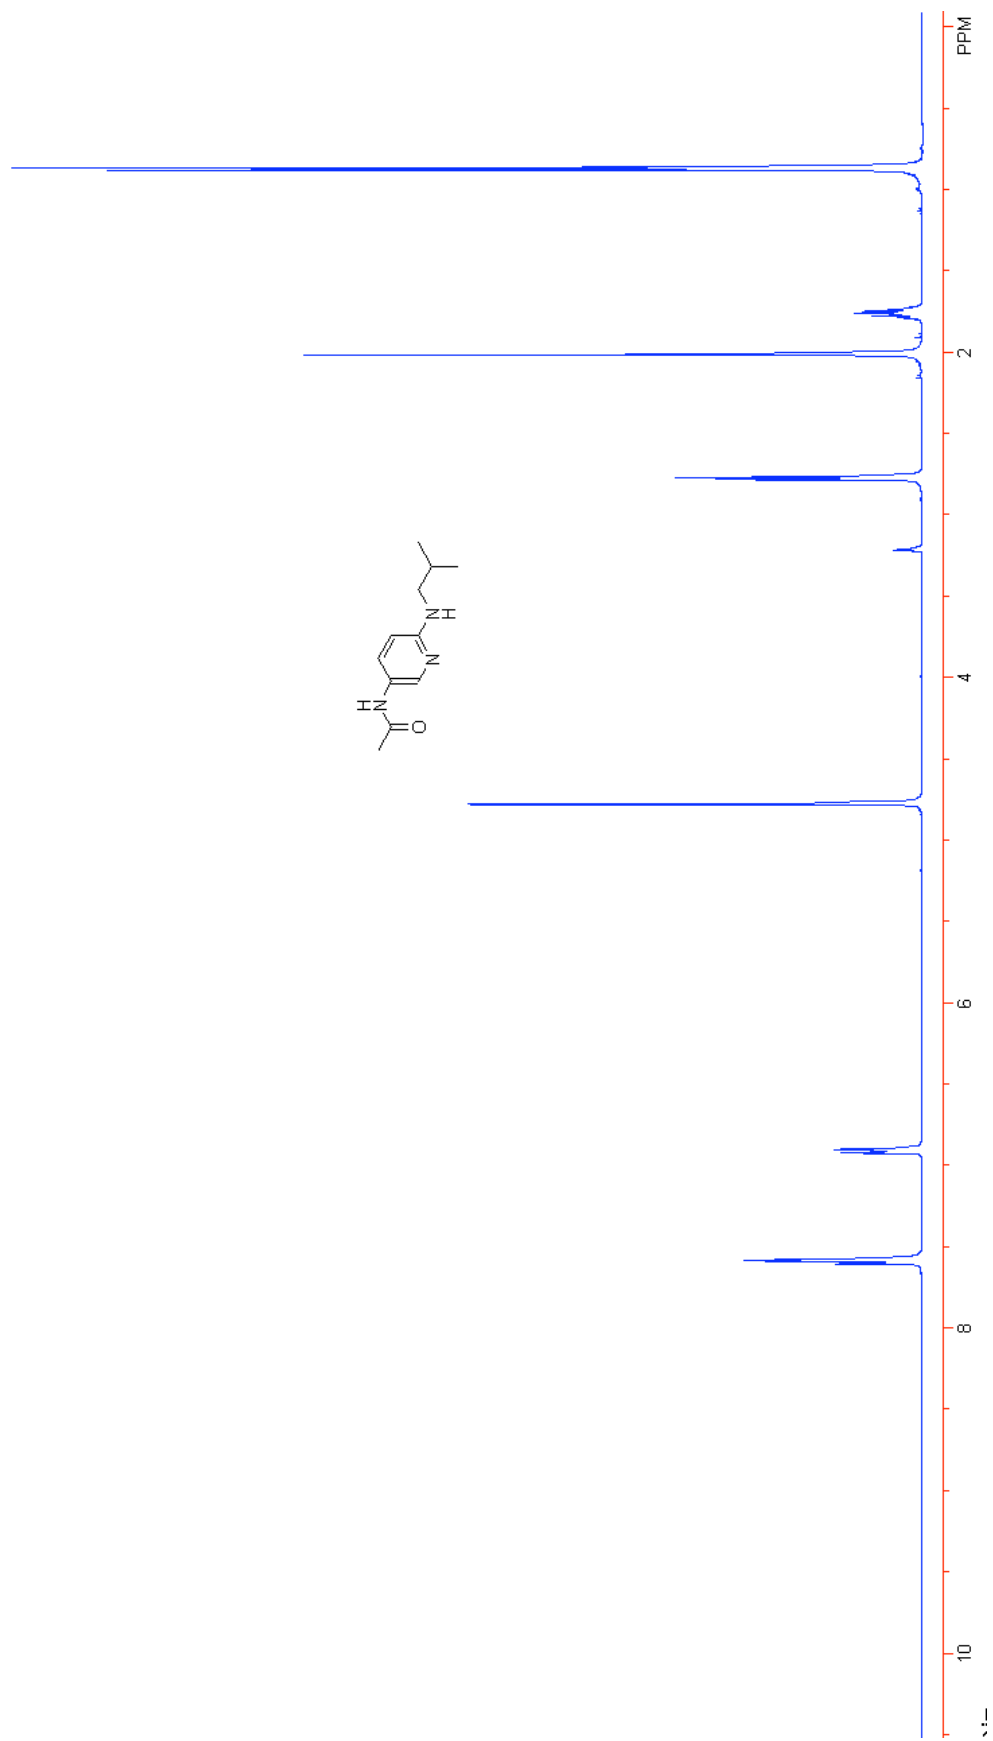

Table 8, entry 4, 5-Acetamido-2-N-iso-butylaminopyridine

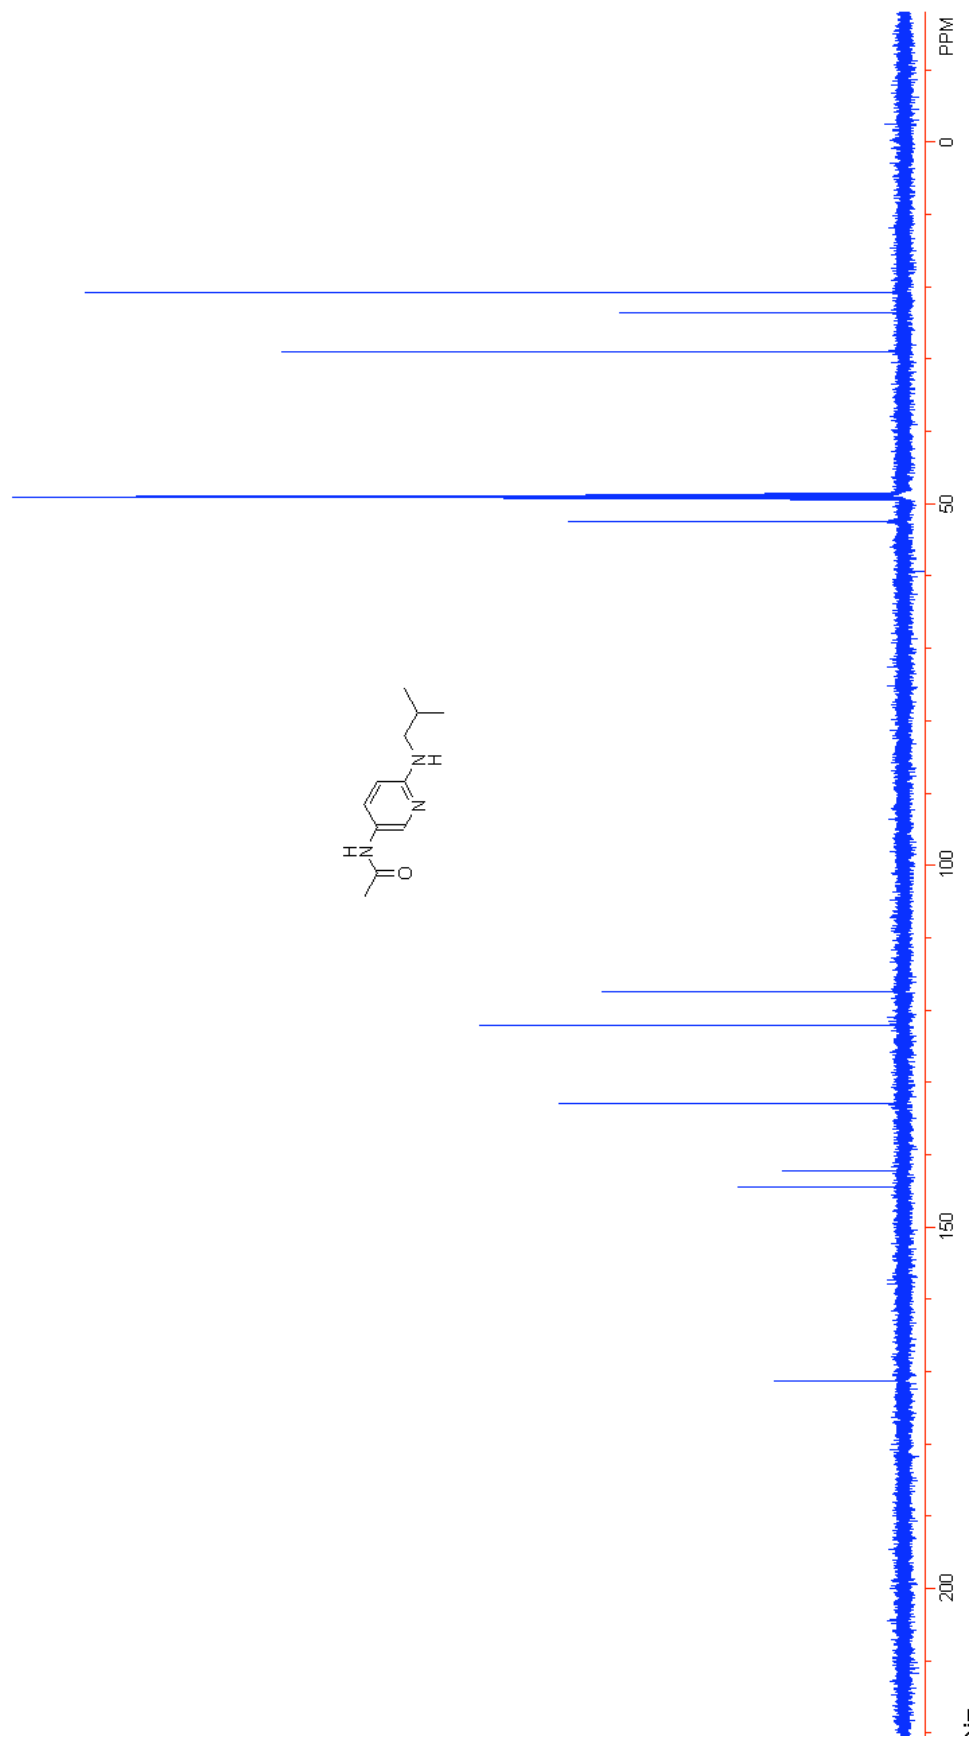

Table 8, entry 6, 3-Hydroxy-5-N-cyclohexylaminopyridine

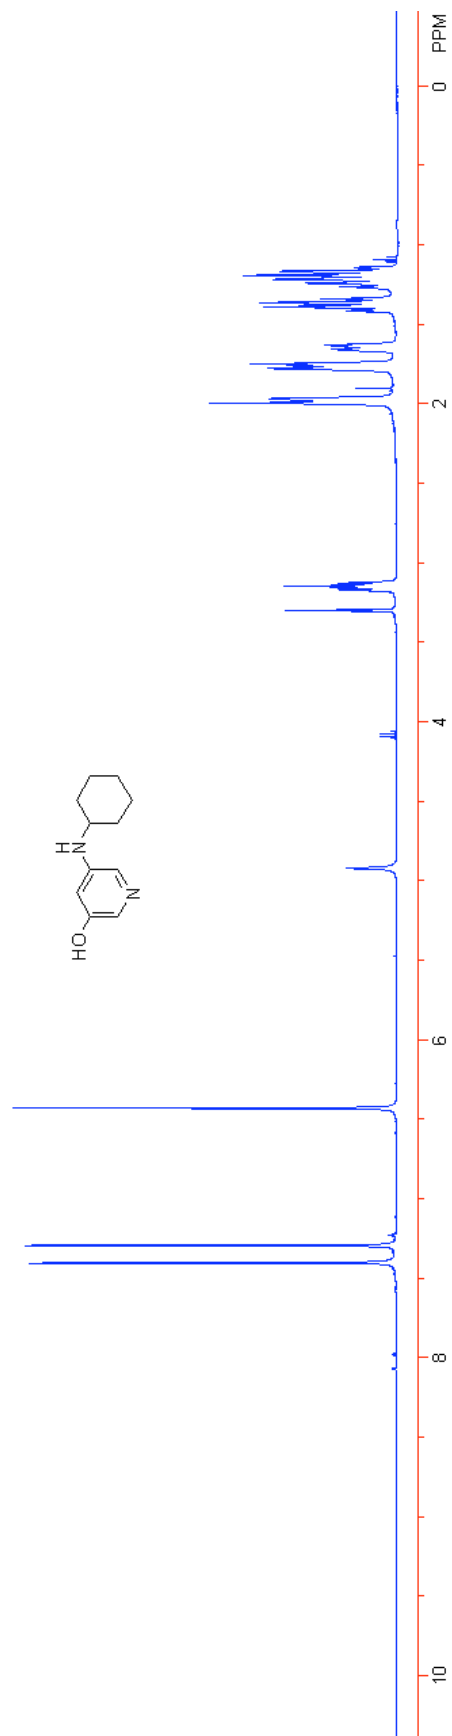



Table 8, entry 6, 3-Hydroxy-5-N-cyclohexylaminopyridine

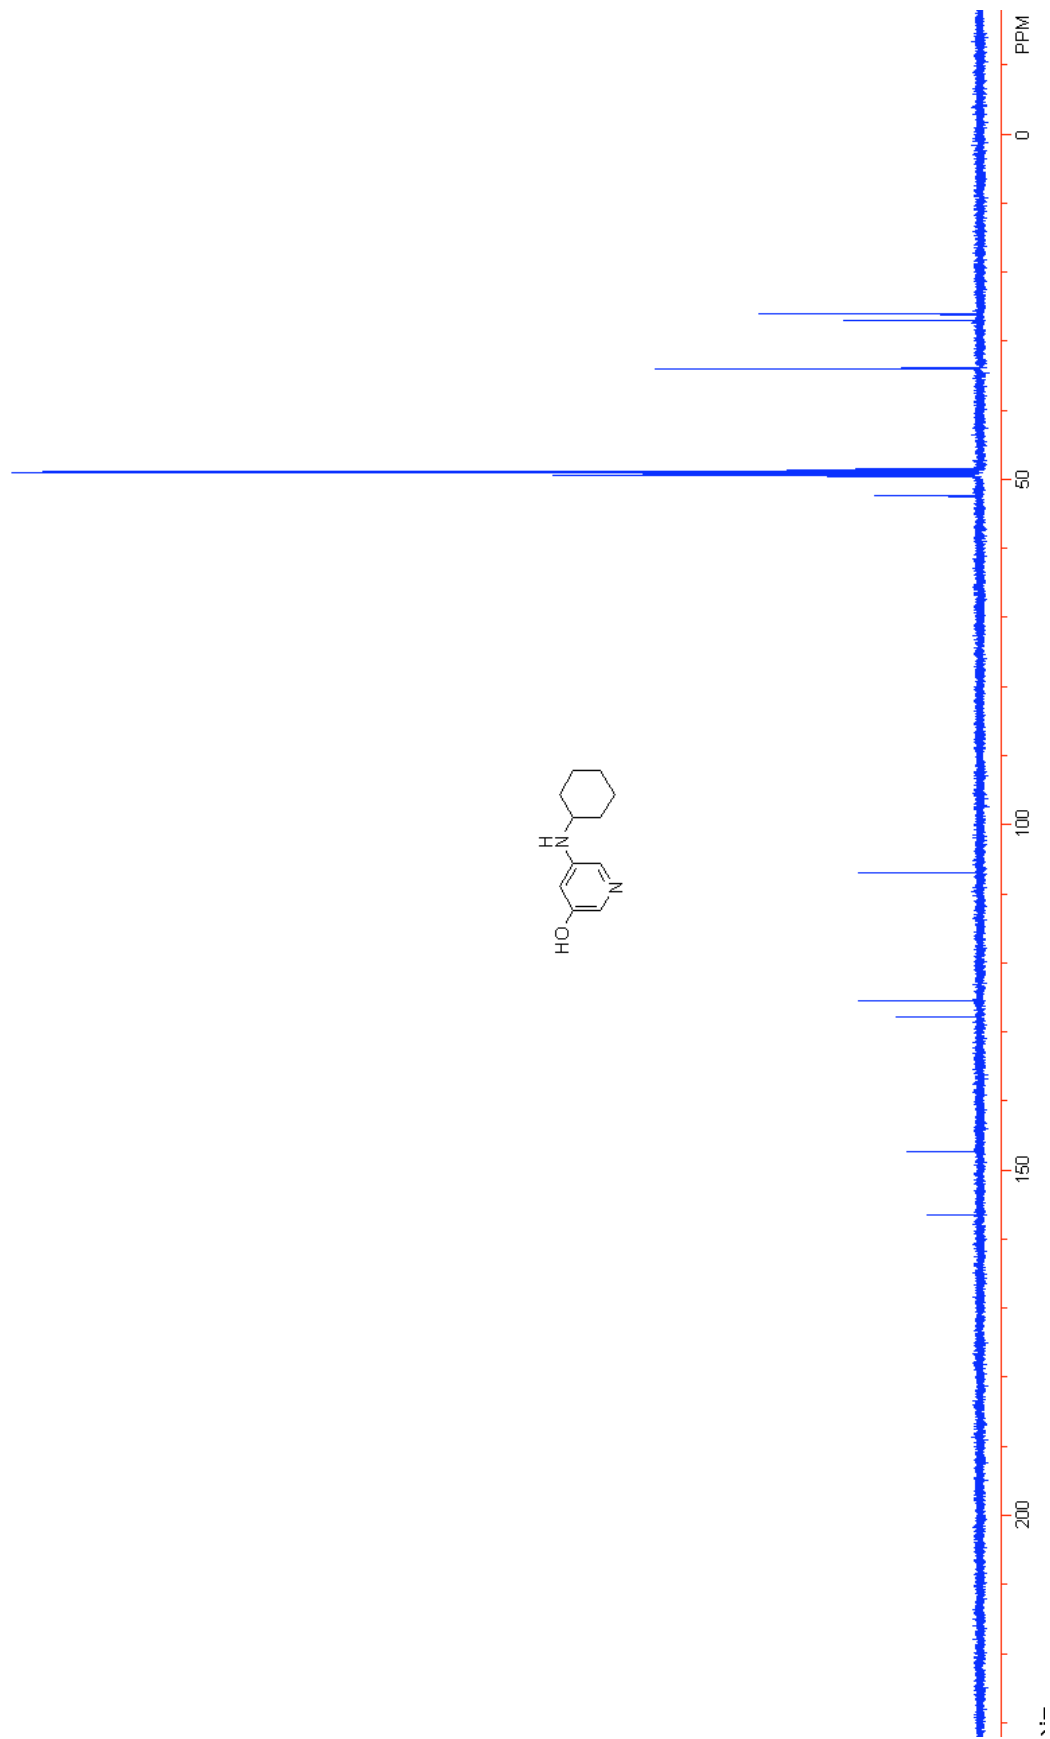

Table 9, entry 16, *N*-iso-Butylamino-benzylalcohol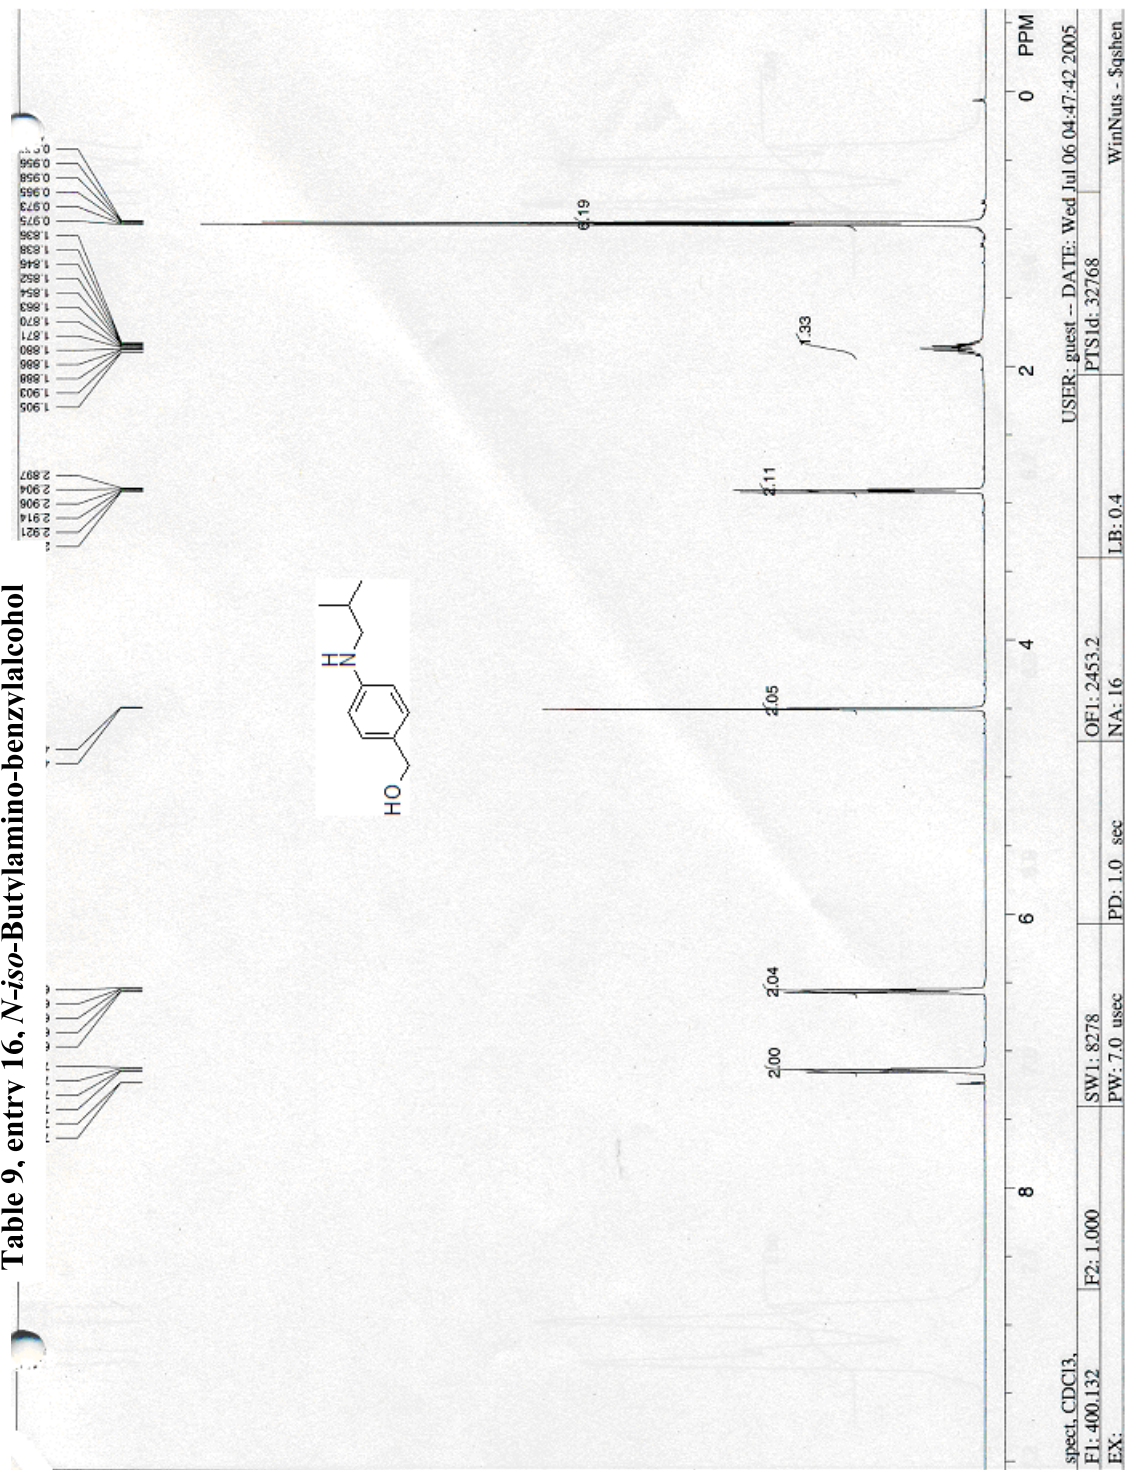

Table 9, entry 16, *N*-iso-Butylamino-benzylalcohol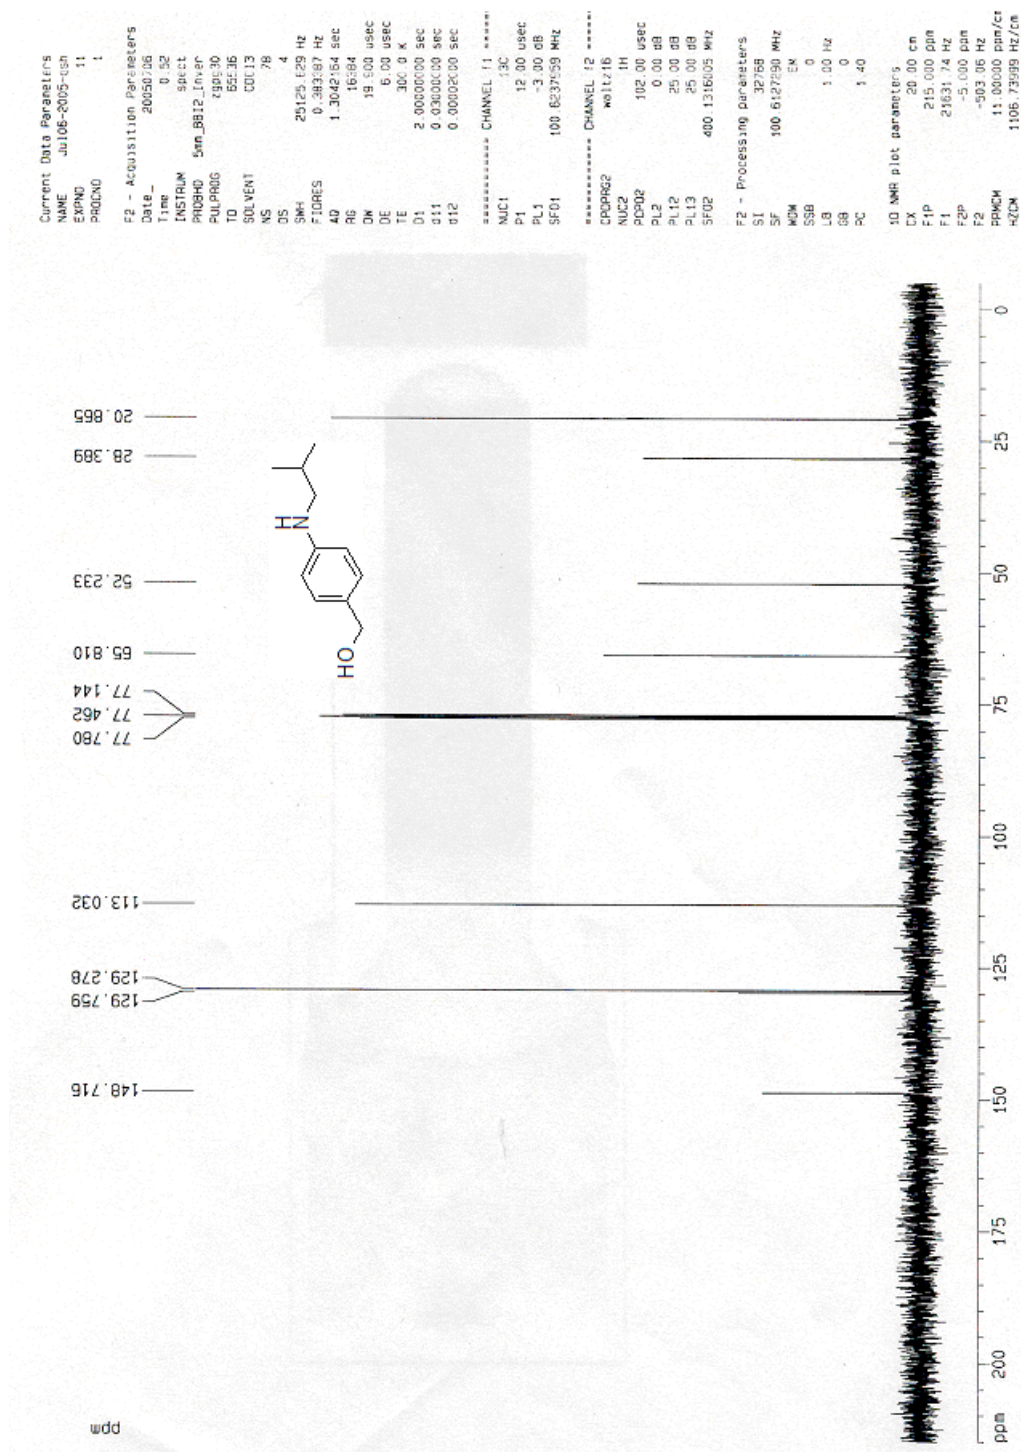

Table 9, entry 22, 3-Hydroxy-N-cyclohexyl-aniline

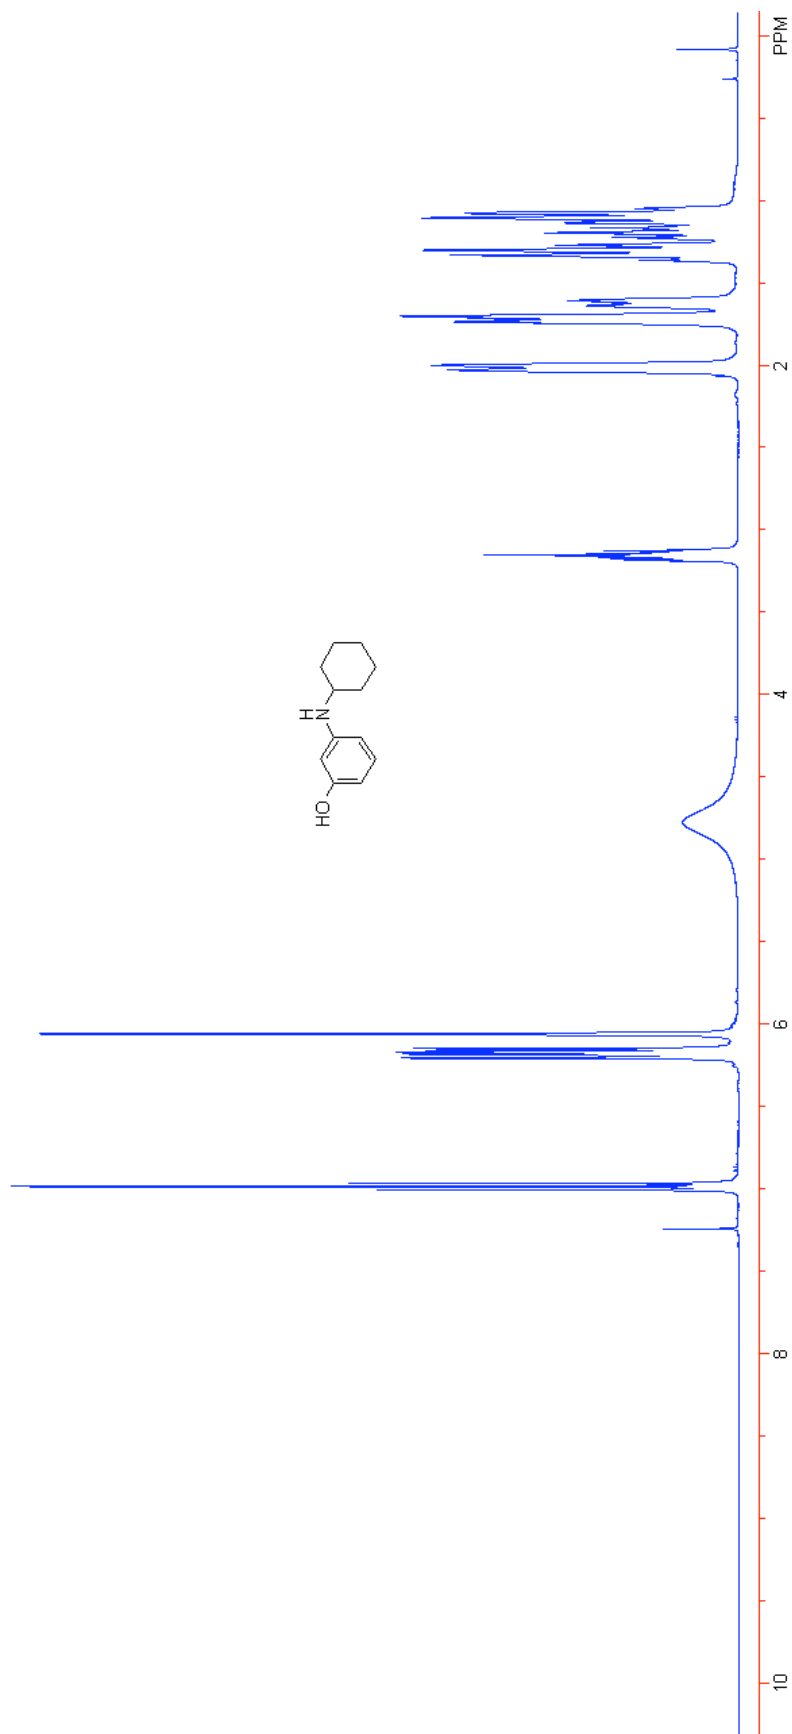

Table 9, entry 22, 3-Hydroxy-N-cyclohexyl-aniline

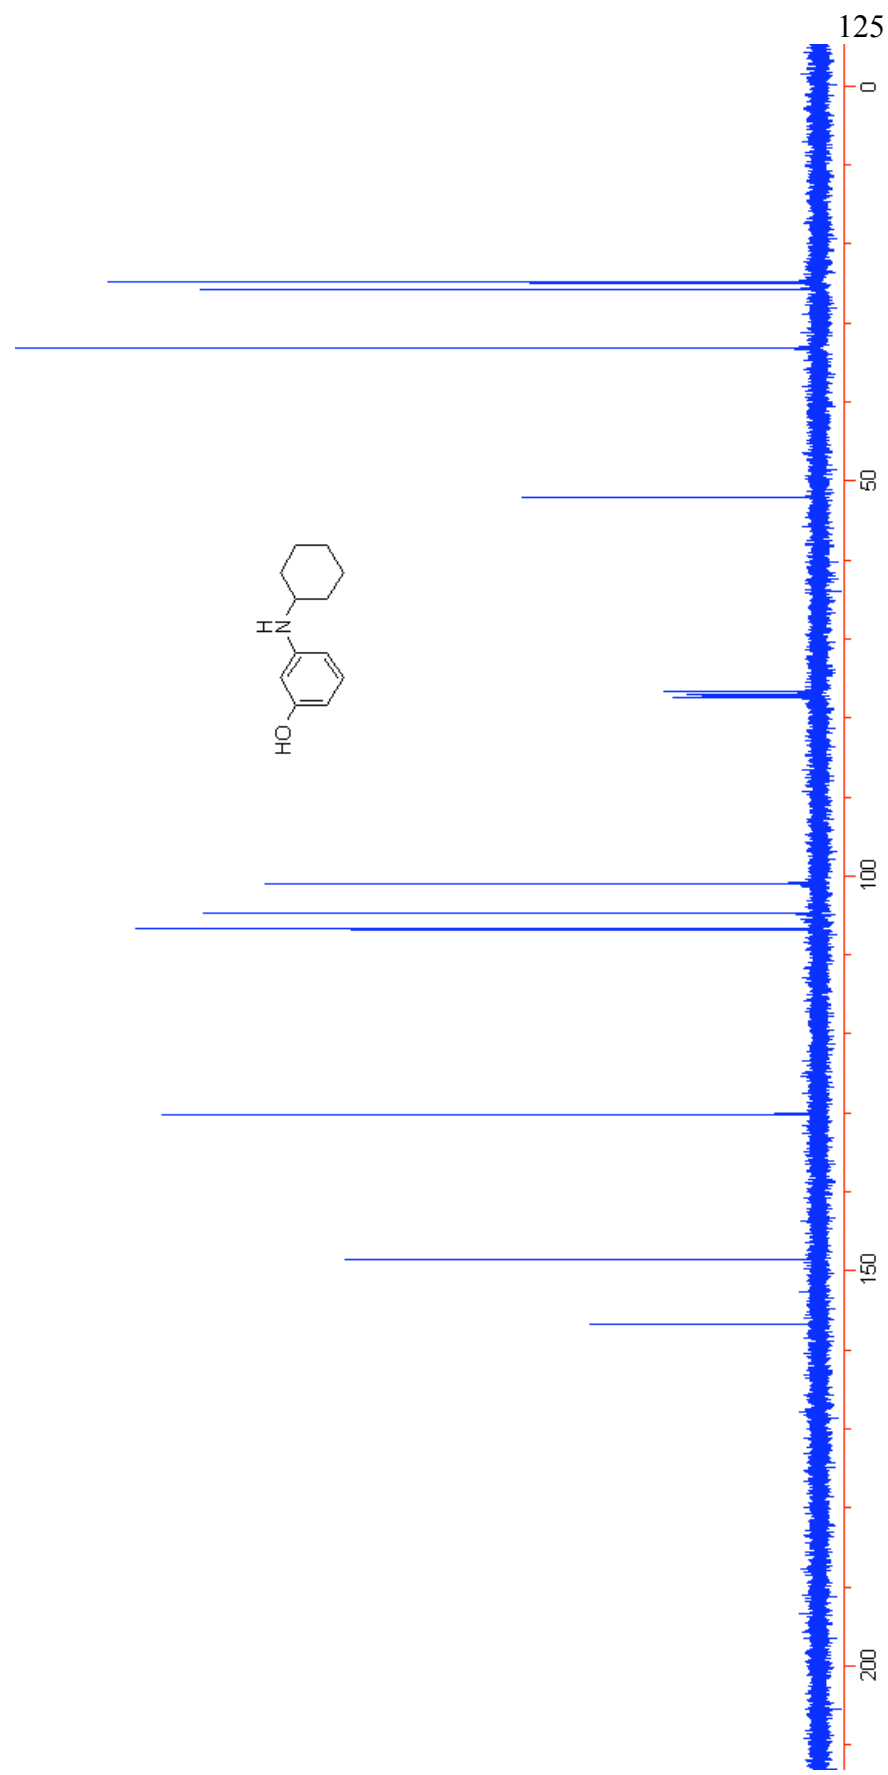

Table 9, entry 29, Methyl-2-(benzylamino)-benzoate

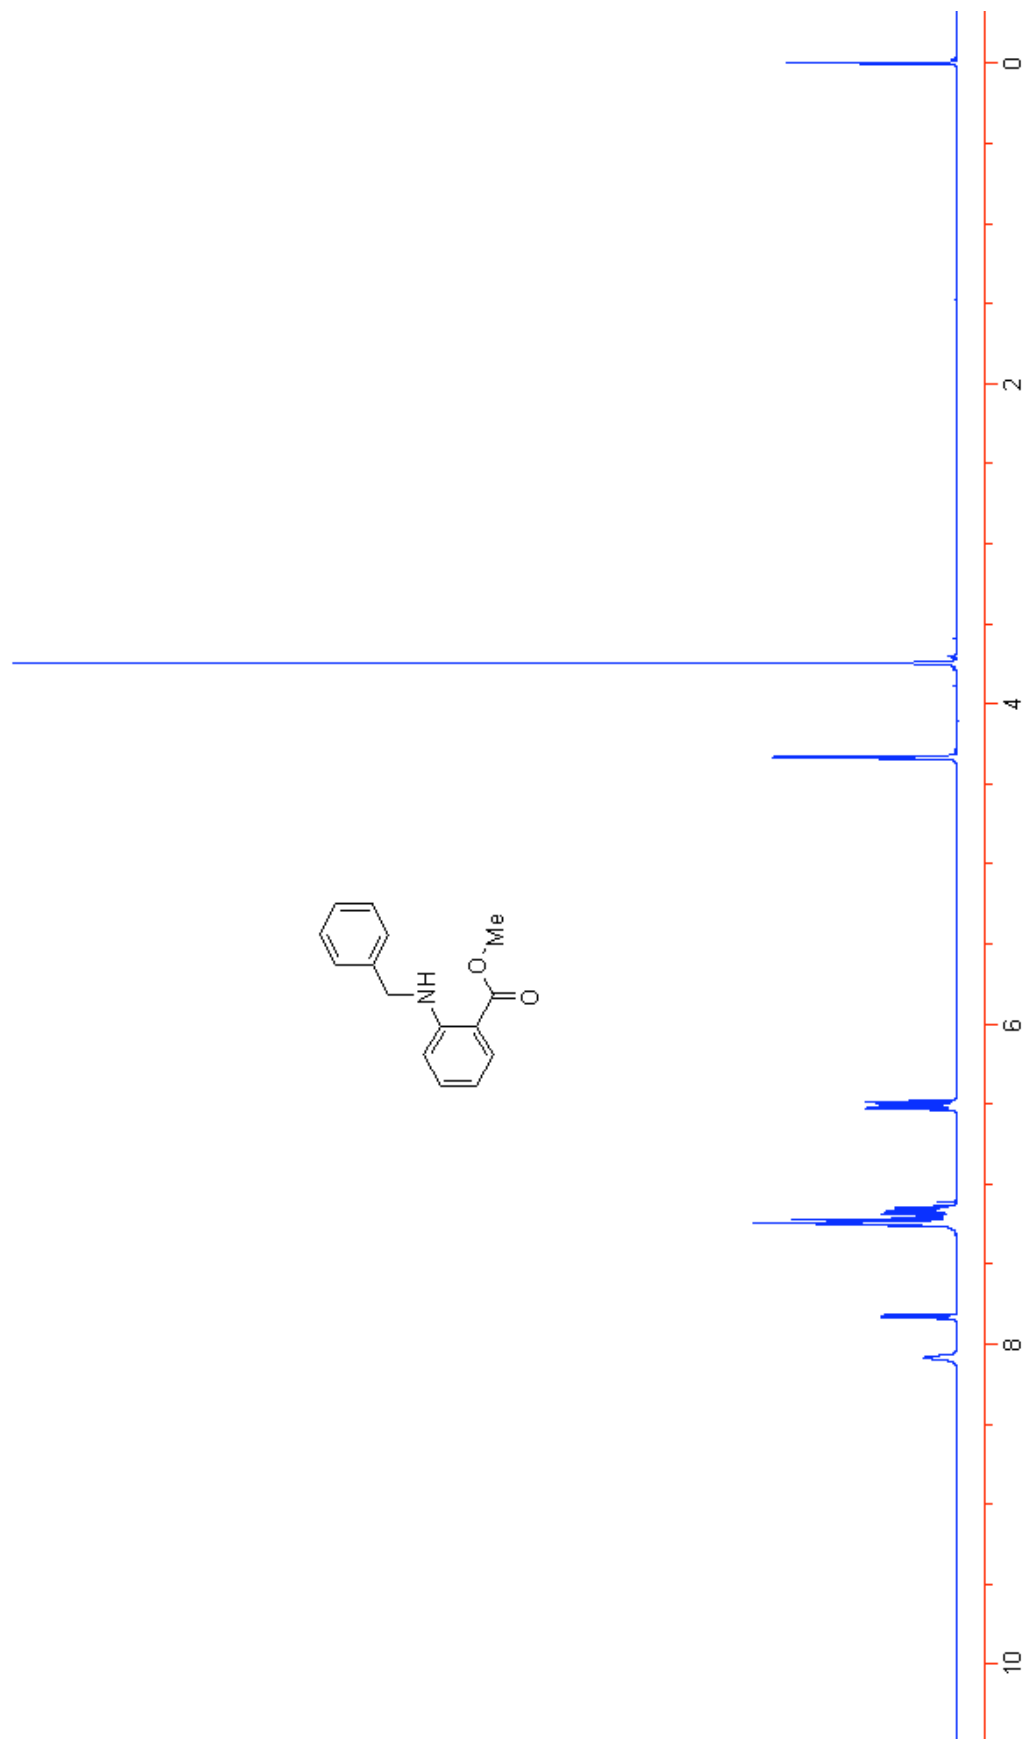

Table 9, entry 29, Methyl-2-(benzylamino)-benzoate

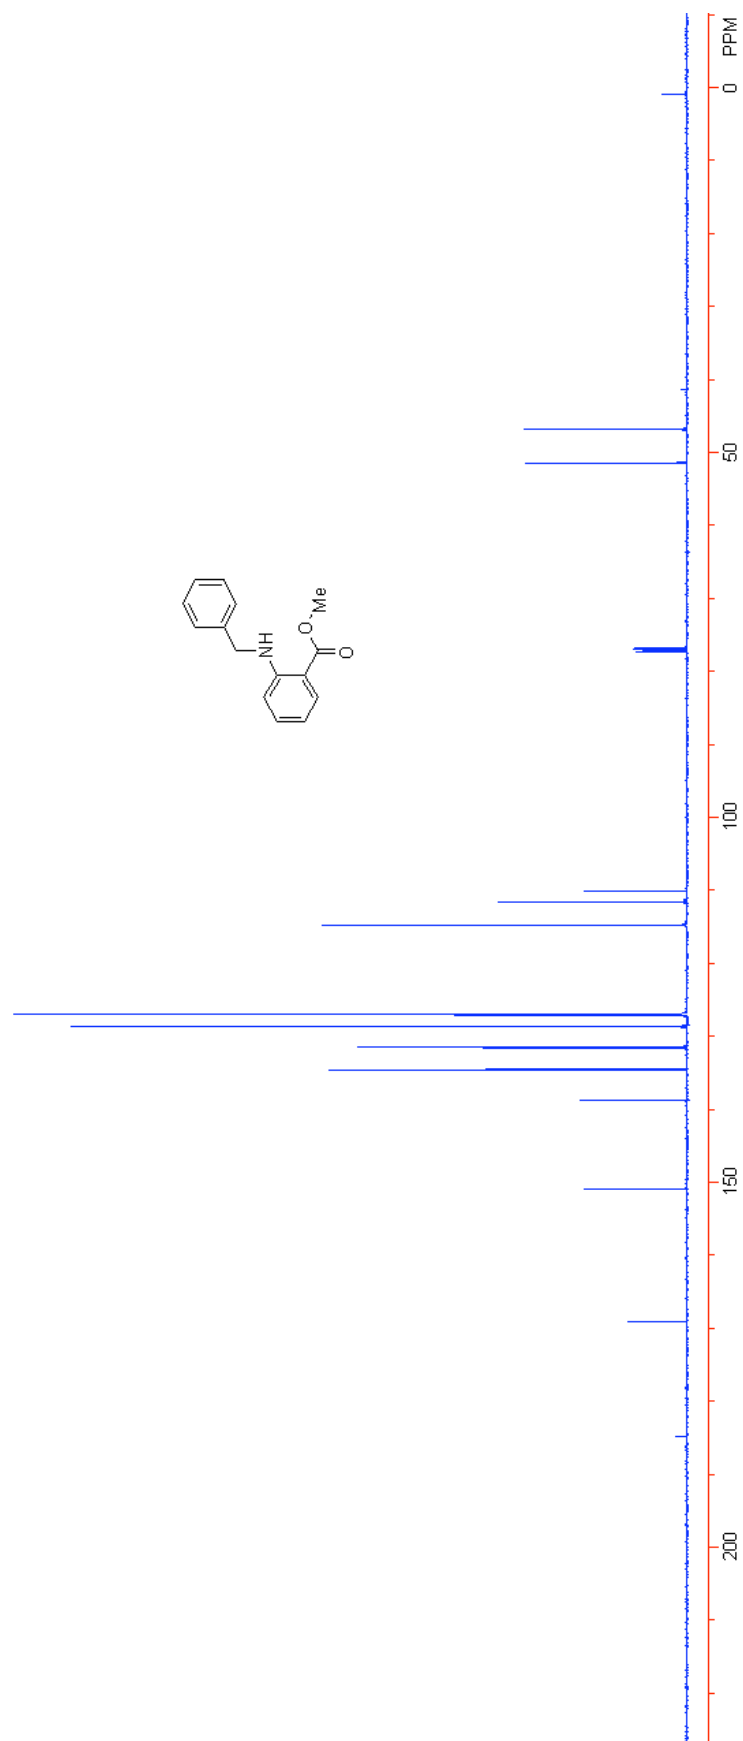

2,2,2

**Racemic Ligand 11** [CpFe(C<sub>5</sub>H<sub>3</sub>(CH(*m*Pr)PCy<sub>2</sub>)(P<sup>t</sup>Bu<sub>2</sub>))-1,2]

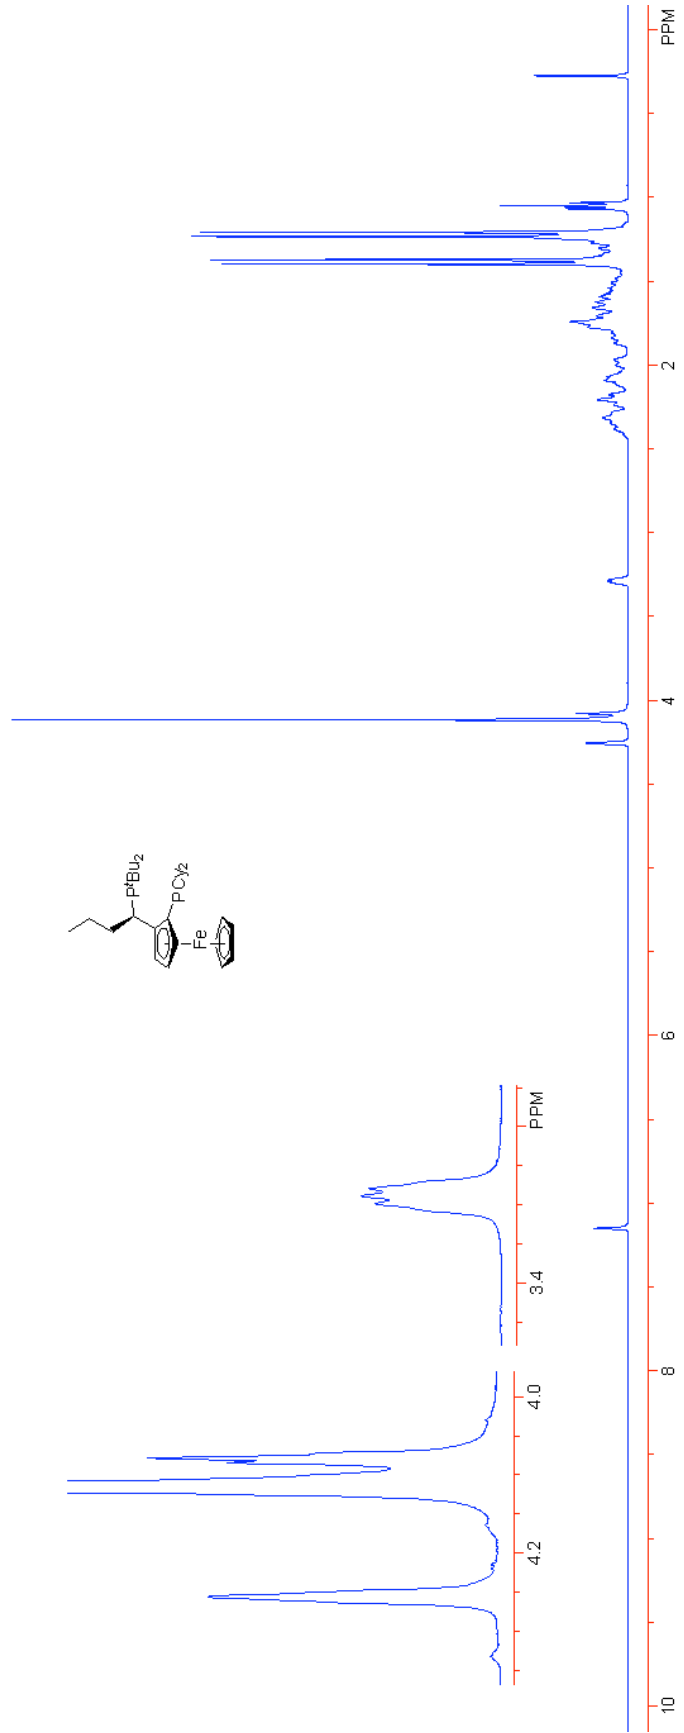



**Racemic Ligand 11** [ $\text{CpFe}(\text{C}_5\text{H}_5)(\text{CH}(\text{mPr})\text{PCy}_2)(\text{tBu}_2\text{P})$ ]-1,2]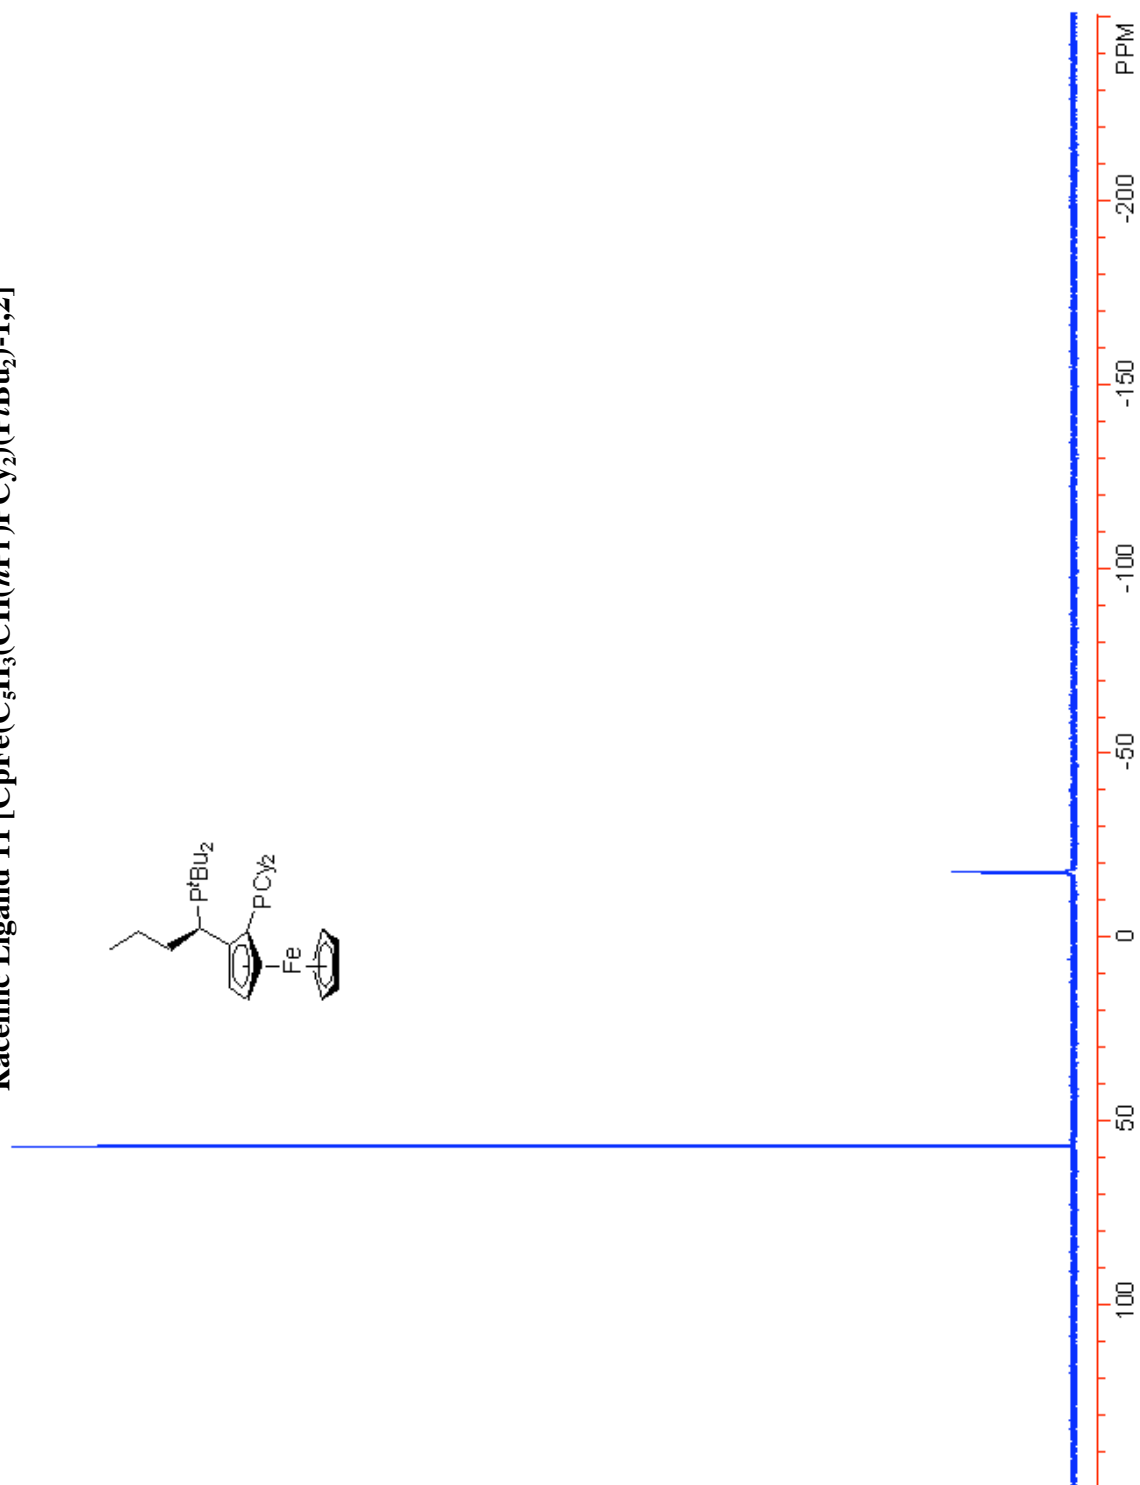

**Racemic Ligand 11**  $[\text{CpFe}(\text{C}_5\text{H}_3(\text{CH}(\text{nPr})\text{PCy}_2)(\text{P}^t\text{Bu}_2))\text{-1,2}]$

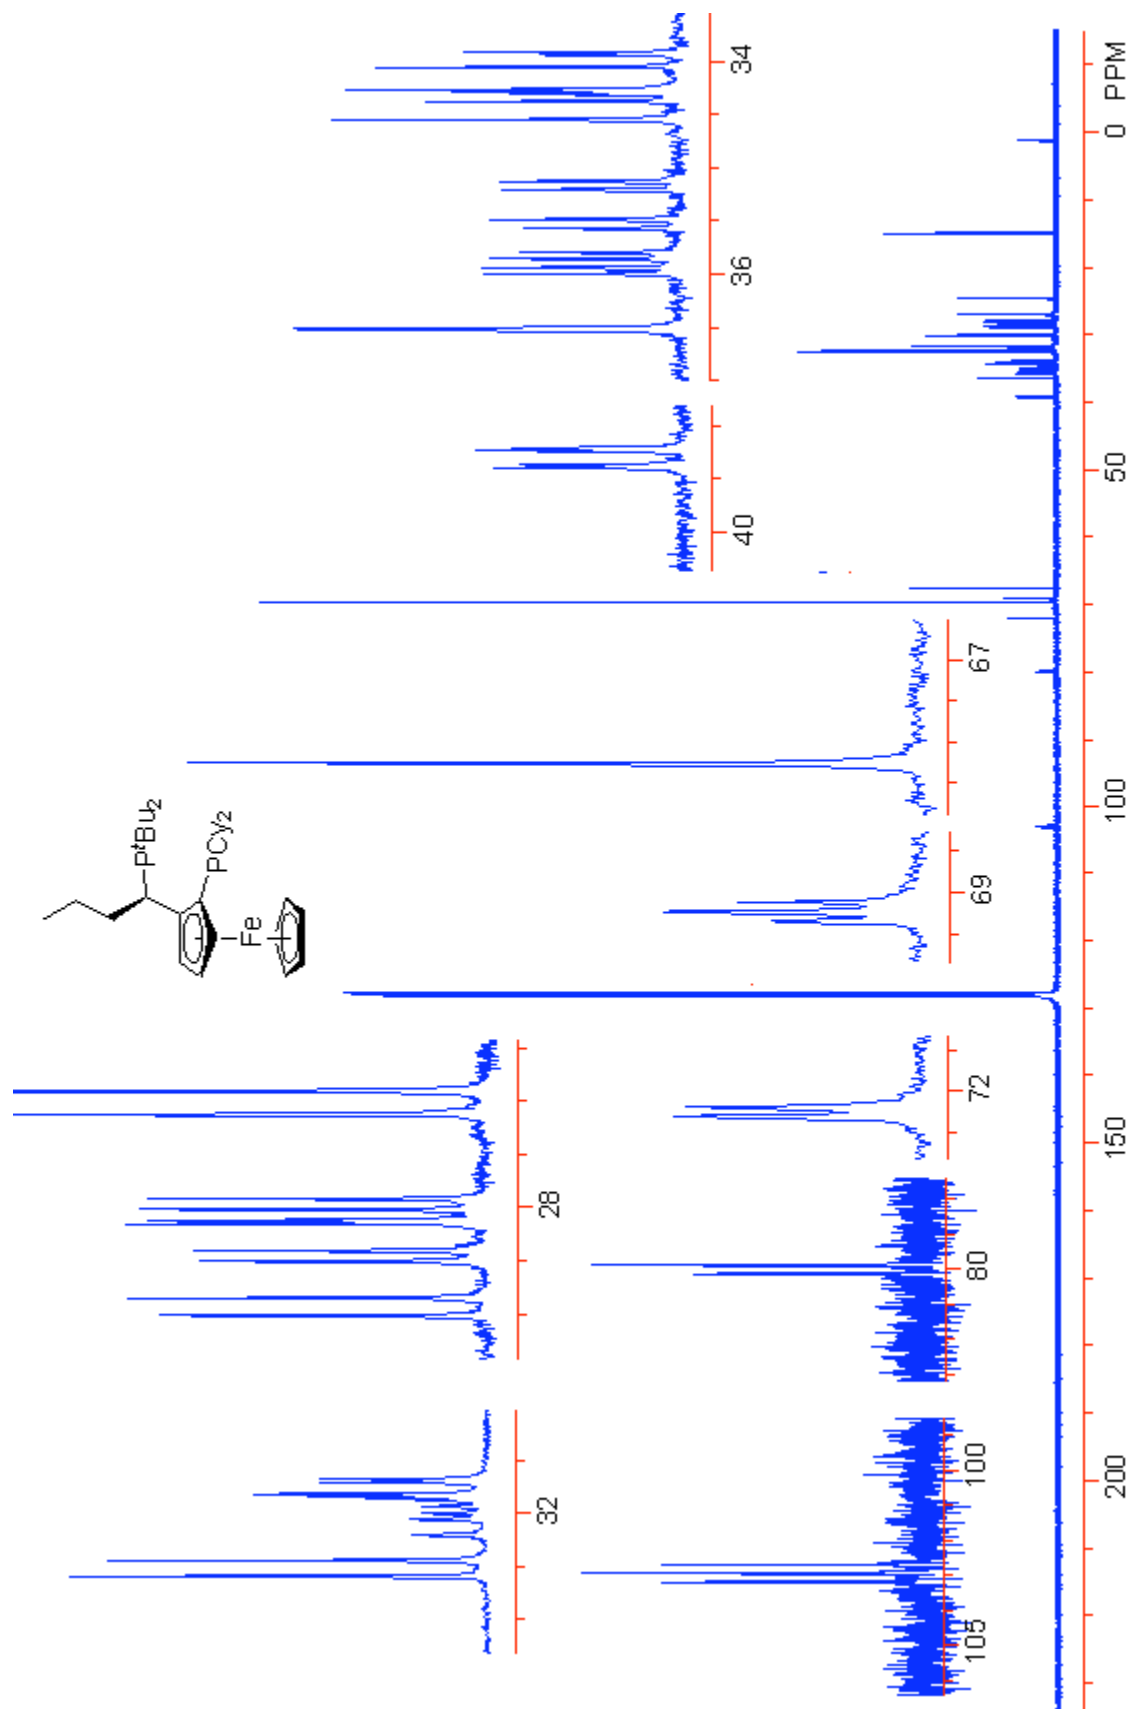

**Ligand 13**  $[\text{CpFe}(\text{C}_5\text{H}_3(\text{CH}(\text{Me})\text{P}(\text{O})\text{Cy}_2)(\text{P}^t\text{Bu}_2))\text{-}1,2]$

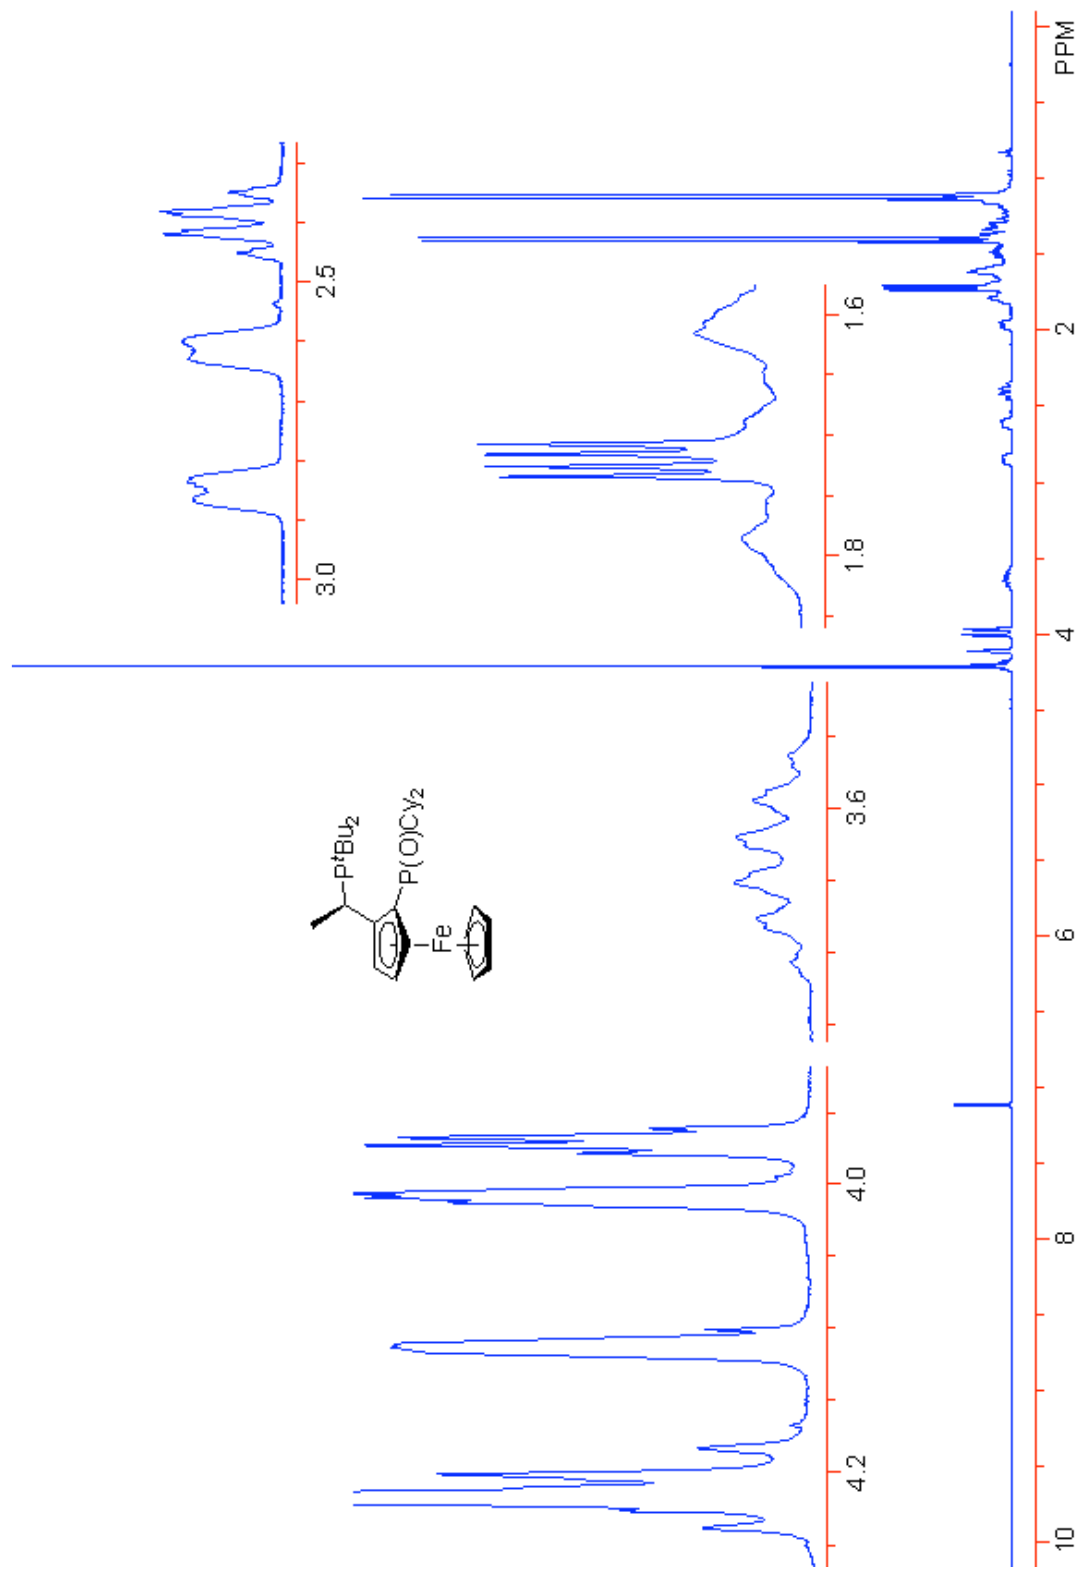

Ligand 13 [CpFe(C<sub>5</sub>H<sub>3</sub>(CH(Me)P(O)Cy<sub>2</sub>)(P<sup>t</sup>Bu<sub>2</sub>))-1,2]

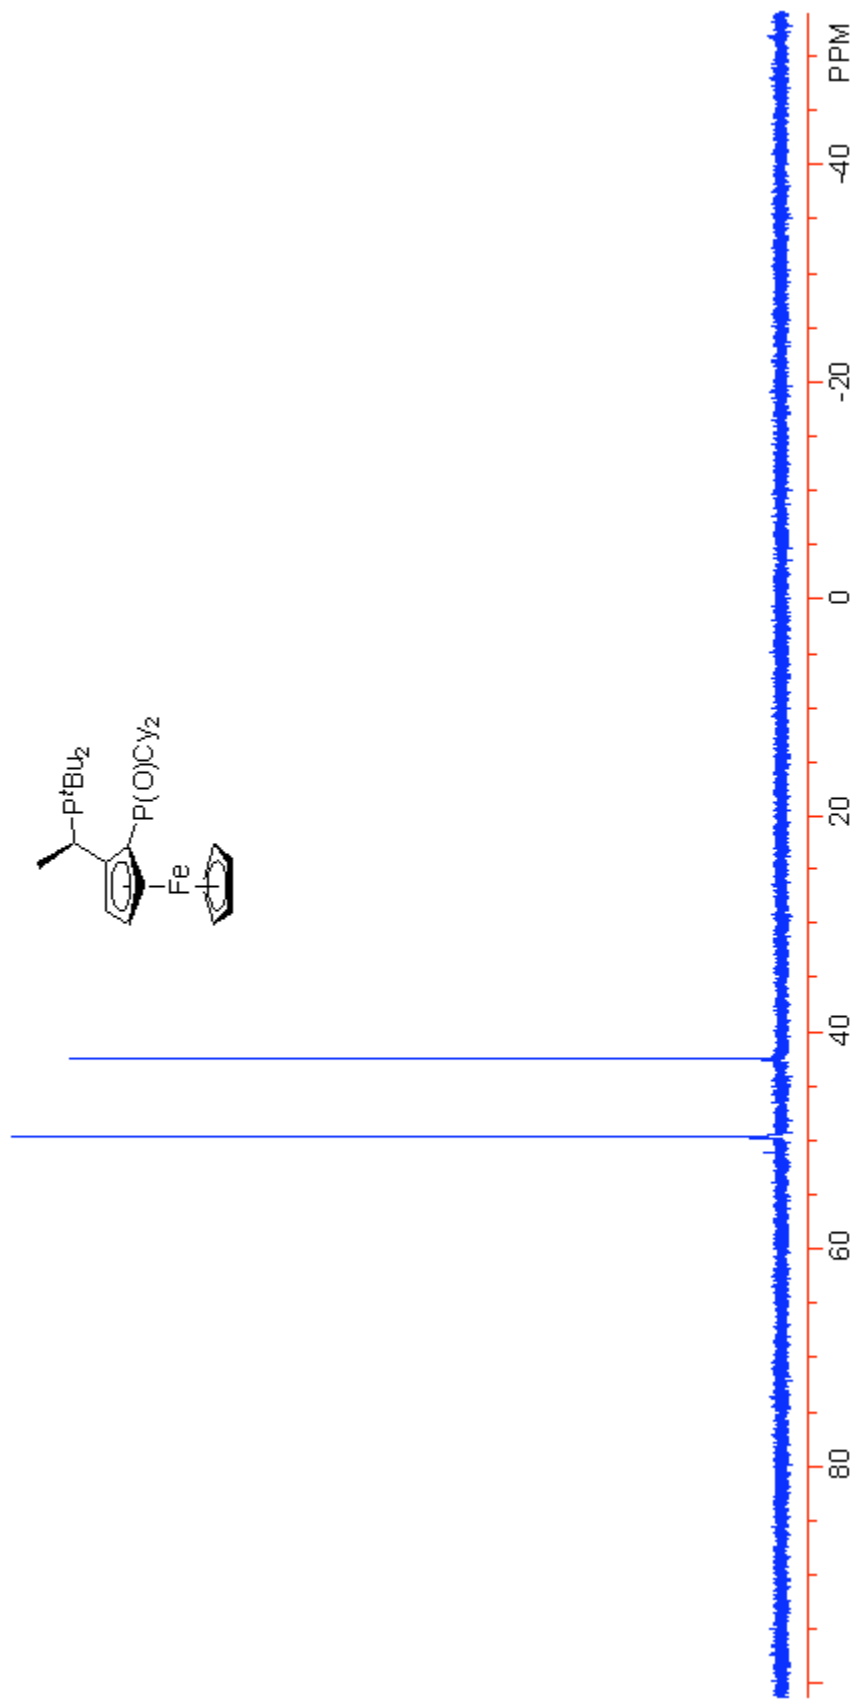

Ligand 13  $[\text{CpFe}(\text{C}_5\text{H}_3(\text{CH}(\text{Me})\text{P}(\text{O})\text{Cy}_2)(\text{P}^t\text{Bu}_2))\text{-}1,2]$ 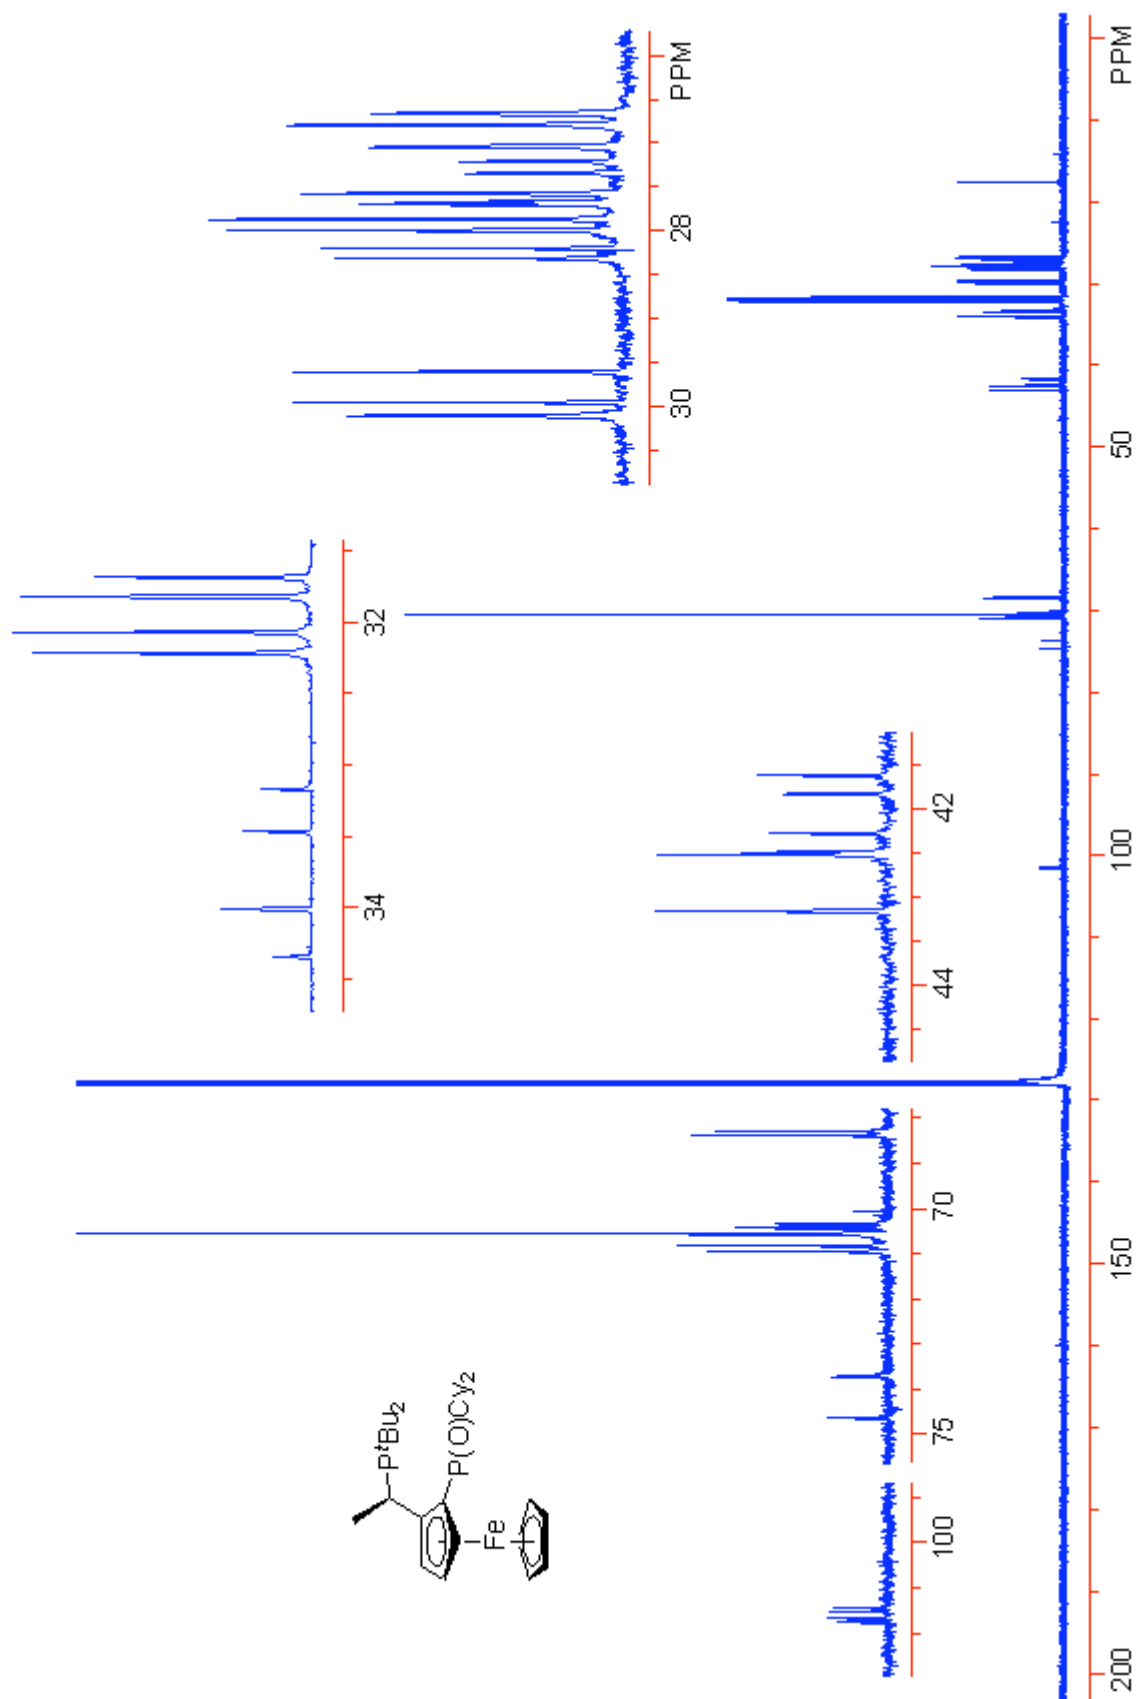

Ligand 17, XantPhos Mimic

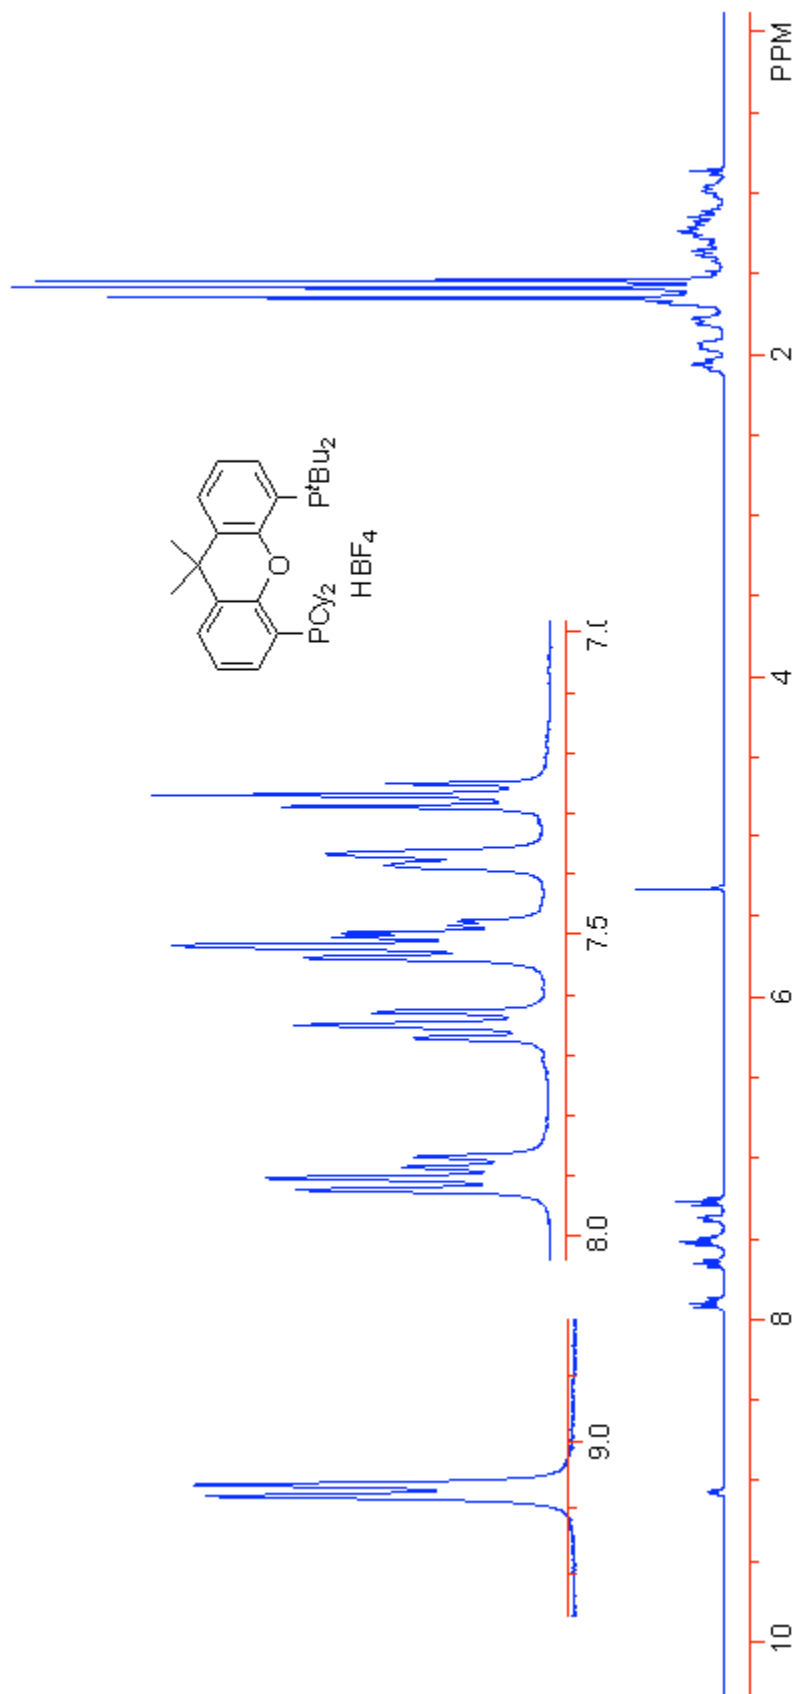

**Ligand 17, XantPhos Mimic**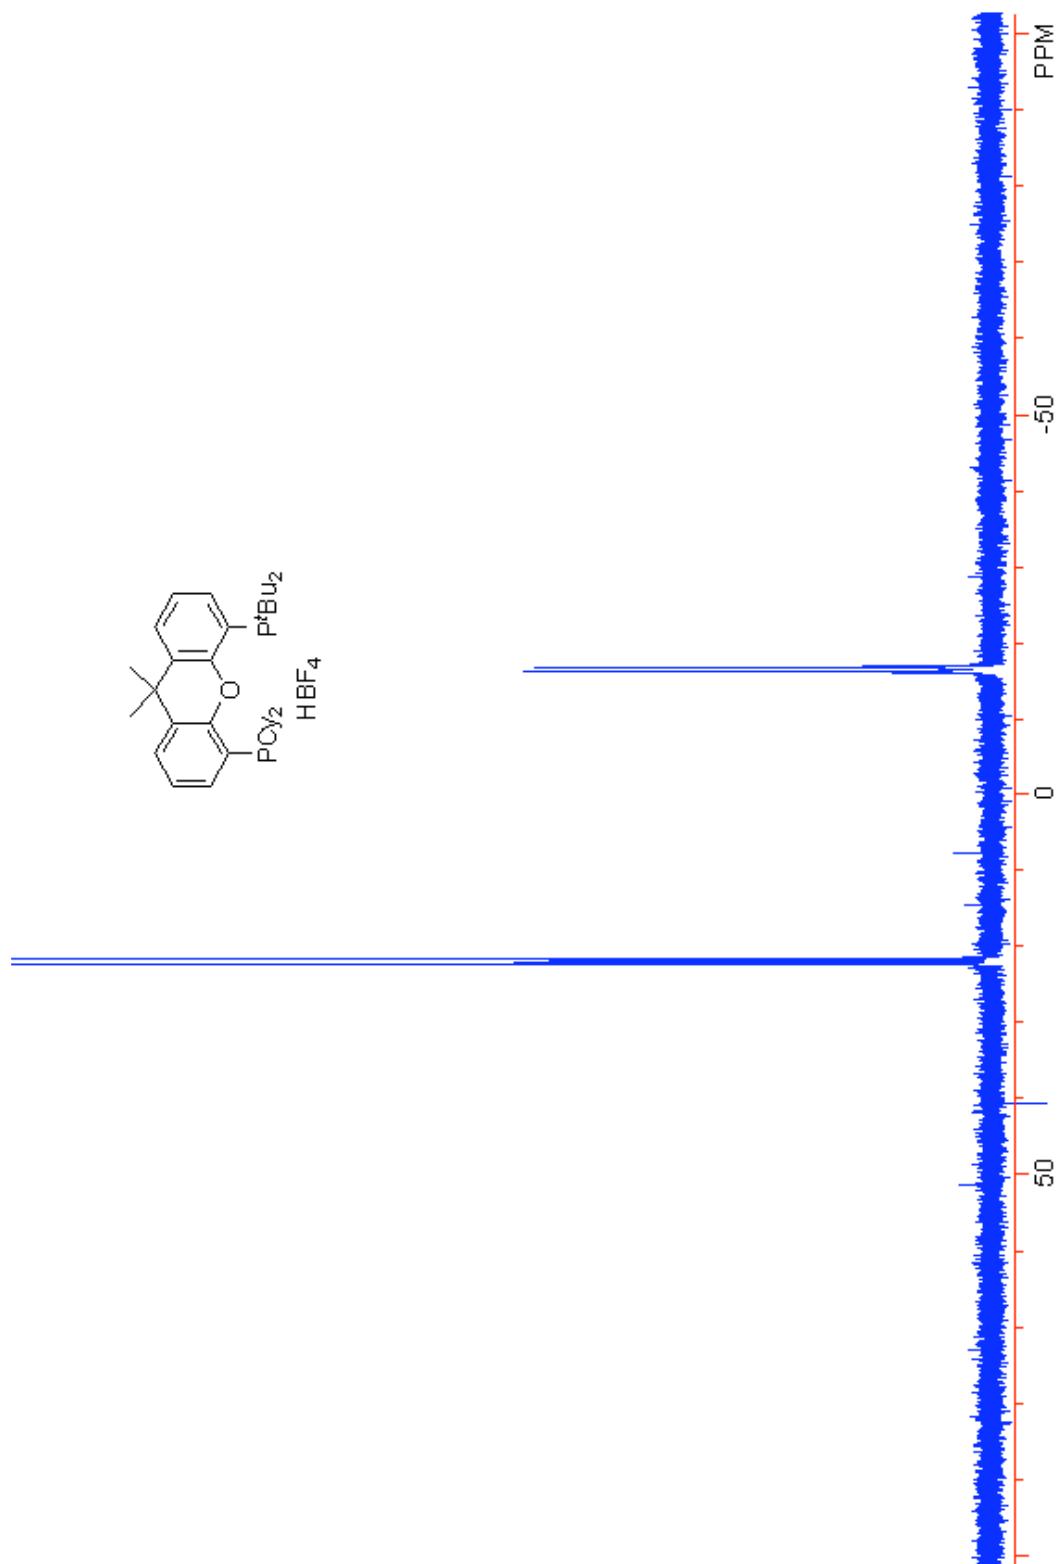

**Ligand 17, XantPhos Mimic**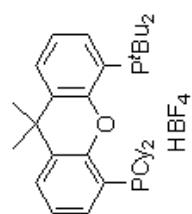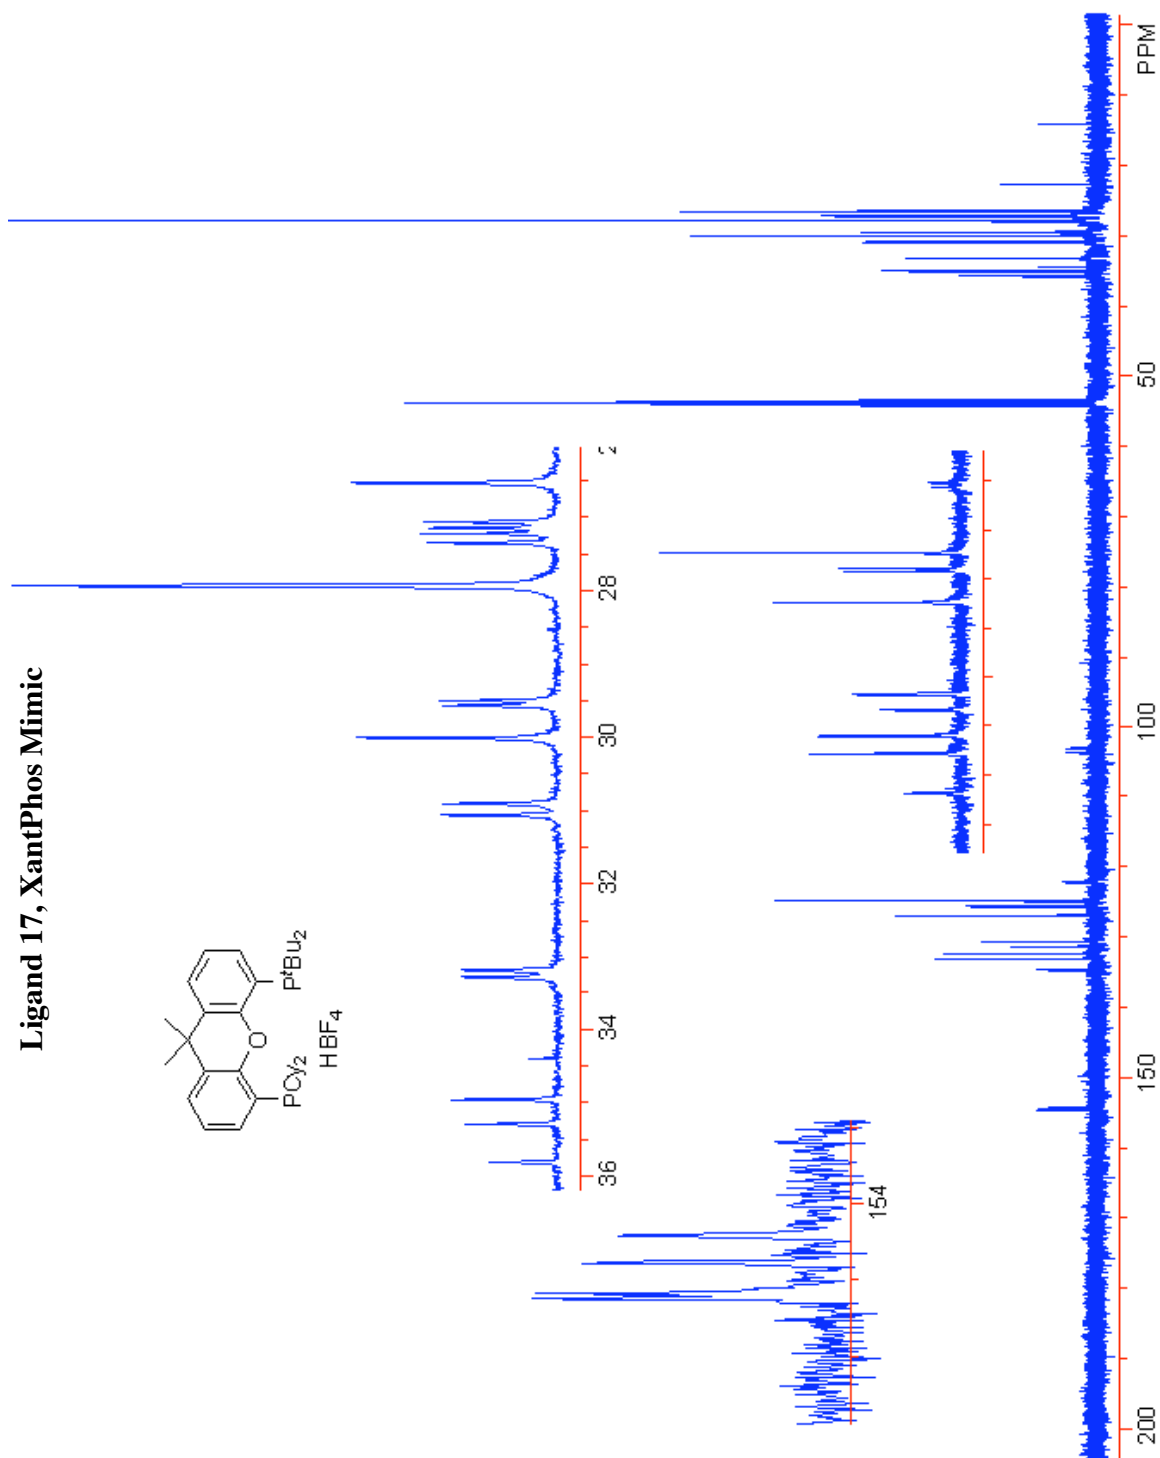

Supplement: NIHMS171850-supplement-1.pdf [file NIHMS171850-supplement-1.pdf]
